# Supplementary material for: Tricalbin proteins regulate plasma membrane phospholipid homeostasis
Source: Life Sci Alliance. 2022 Apr 19;5(8):e202201430. doi: 10.26508/lsa.202201430 (PMC9018018; doi:10.26508/lsa.202201430)
Supplement: Supplementary file 1 [file LSA-2022-01430_SdataF1.xlsx]

## Sheet: Fig 1B
Figure 1B: GCAMP3 fluorescence as measured by flow cytometry in Wild type, tcb1/2/3D, scs2/22 ist2D and Dtether cells
Strain	Wild type									tcb1/2/3D									scs2/22 ist2D									Dtether
Exp.	1			2			3			1			2			3			1			2			3			1			2			3
	FSC	SSC	FITC-background	FSC	SSC	FITC-background	FSC	SSC	FITC-background	FSC	SSC	FITC-background	FSC	SSC	FITC-background	FSC	SSC	FITC-background	FSC	SSC	FITC-background	FSC	SSC	FITC-background	FSC	SSC	FITC-background	FSC	SSC	FITC-background	FSC	SSC	FITC-background	FSC	SSC	FITC-background					Combined results:	Exp 1		Exp 2		Exp 3
cell 1	62655	77034.8	3724.65	54449.2	34818.6	1565.51	69160.5	80124	163.76	31542.8	19627.2	171.77	82404.8	93337.9	2116.42	58903.5	51688.5	628.34	39317.2	45536	1394.63	48089.2	40909.7	447.67	86743.5	112665	1173.91	84156	73498	2044.33	52994.2	36791.7	210.04	76266	40341.9	798.33						Mean FITC	Relative to WT	Mean FITC	Relative to WT	Mean FITC	Relative to WT
2	58728.8	76092.3	769.85	64710	39023.8	629.23	94773.8	140741	3452.31	44337.8	52175.4	445	83706.8	102535	655.93	57570.8	49202.8	741.37	58873.5	85456.9	1415.1	71597.2	64405.7	1430.23	49681.5	62107.8	302.6	66774.8	50924	772.52	148369	150151	1984.7	70608	71932.5	2382.53					Wild type	815.48	1	960.632	1	1133.95	1
3	84910.5	108093	1425.78	36528	21421.4	266.11	66618	85488.1	1027.06	87575.2	133642	2308.66	83035.5	93945.7	614.99	45504	19225.8	391.6	104403	142964	3287.66	68435.2	52886.5	1769.32	48781.5	63482.8	263.44	54829.5	51029	1834.29	78379.5	99876.7	795.66	123500	95471.2	2558.75					tcb1/2/3	747.164	0.916226	1096.36	1.1413	1113.12	0.981632
4	52170.8	66210.7	717.34	63132	49741.2	539.34	162018	262143	436.1	42798.8	48293.2	480.6	127522	160952	1124.07	41595.8	24751.8	542.01	96835.5	99882.9	1717.7	65103	54143.1	665.72	51881.2	66864.8	182.45	54857.2	58288.8	436.99	61811.2	92050	459.24	61545	67680.9	1496.09					scs2/22 ist2	1623.46	1.99081	2116.92	2.20367	2091.81	1.84472
5	52801.5	78273.7	290.14	78342.8	58646.6	807.23	81545.2	97620.5	391.6	46267.5	93302.3	552.69	58873.5	75951.7	777.86	59963.2	48712.4	2062.13	61626	67707.6	2786.59	85188.8	85141	2474.2	127709	185767	2606.81	59614.5	53582.4	824.14	96936	145957	1269.14	48200.2	33713.2	360.45					tether	1920.73	2.35534	1924.91	2.0038	1948.88	1.71868
6	70104.8	89020.5	1494.31	56686.5	43464	721.79	74722.5	97881.3	1477.4	49990.5	59309.6	1780.89	59457.8	62591.9	367.57	40291.5	37415.6	1258.46	75566.2	81405.6	2247.25	149392	113797	4919.03	95928.8	124051	952.3	71277	53034.2	777.86	131218	226018	1760.42	64724.2	48375.9	801.89
7	83224.5	97738	2130.66	43574.2	28472.9	427.2	75747.8	106448	167.32	98670.8	94471.7	1148.99	96649.5	136136	708.44	48704.2	31510.4	332.86	103828	214653	9596.87	98933.2	54325.6	1773.77	57534	98161.7	2047.89	62931.8	61203.5	539.34	77310.8	109616	797.44	86785.5	81696.7	387.15
8	39042.8	45978.3	272.34	42799.5	23385.6	380.03	113714	142735	2961.92	33751.5	29960.1	292.81	122643	146048	1158.78	48981.8	35218.2	396.94	52845	100091	558.03	75259.5	68163.3	2939.67	99469.5	217246	1386.62	69439.5	59058.6	935.39	150700	190921	1805.81	62032.5	41951.9	1766.65
9	77928	105877	1384.84	60130.5	64134.3	812.57	57846.8	66958.3	450.34	75140.2	107120	2603.25	66244.5	67873.2	517.98	157287	122498	1935.75	61638.8	59932.6	886.44	167093	142721	8842.15	130905	142241	1031.51	49278	31888.7	162.87	95349	161288	1767.54	262143	262143	4109.13
10	35553	34568.5	445	129896	95640.3	1354.58	63363	94651.5	1187.26	52081.5	56175.9	287.47	93500.2	125867	825.03	81452.2	57913.2	1737.28	41373.8	40897.3	687.97	58837.5	50099	558.92	111881	127819	3124.79	34866	42380	760.06	174421	262143	4576.38	52960.5	46919.9	334.64
11	37374.8	38302.9	884.66	65583.8	50342	1813.82	126645	167170	526.88	33752.2	37572.2	722.68	120040	179678	1355.47	75522.8	56286.3	651.48	64629.8	90506.8	1081.35	101510	45116.8	904.24	131932	243241	2184.06	39406.5	51026.4	1257.57	130444	234576	500.18	68647.5	55712.2	1847.64
12	35545.5	35747.7	534	116084	117548	1686.55	93221.2	138035	979	39418.5	29955.6	212.71	87067.5	107881	652.37	51563.2	38996.2	1709.69	44028.8	35729.1	835.71	73509	36373.4	552.69	175408	262143	853.51	64048.5	53003.1	174.44	47970.8	42094.3	71.2	78003.8	71044.2	2230.34
13	146030	177423	3355.3	69320.2	52926.5	1244.22	175295	262143	4272.89	36841.5	32806.3	257.21	84797.2	108126	500.18	96577.5	80140	1065.33	38734.5	42513.5	107.69	69006.8	42237.6	760.95	123232	138658	1066.22	41230.5	27753.8	73.87	64078.5	70858.2	1943.76	152764	189262	2239.24
14	49281	59703	242.08	86718	50195.1	1233.54	90508.5	107719	921.15	37017.8	41155.4	85.44	76854.8	108949	1055.54	80833.5	82328.6	822.36	53391.8	56679.6	732.47	114588	98379.7	5405.86	58628.2	68694.6	1249.56	175899	185378	2111.97	118076	147655	1424.89	138215	132371	1229.09
15	51946.5	69658.5	248.31	120456	94852.6	3800.3	60249.8	84263.4	698.65	37490.2	38518.3	358.67	71361.8	83186.5	539.34	53549.2	44198.3	880.21	59187.8	80085.8	2516.92	86444.2	32744	294.59	112370	245701	1694.56	138512	147337	1677.65	139953	213742	704.88	157984	126125	4036.15
16	31754.2	37153.9	963.87	45932.2	24823	566.04	54714.8	63869.1	356.89	32725.5	35721.9	969.21	67068.8	90242.4	1556.61	75609	68476.6	940.73	77317.5	88585.3	496.62	56768.2	44481.3	42.72	262143	262143	10132.6	67841.2	51683.2	1347.46	116596	189077	1797.8	134270	131455	1091.14
17	46536.8	73398.3	611.43	68298.8	61565.8	989.68	98301.8	204619	1961.56	39756.8	40774.5	264.33	54510	71368.2	339.09	93075	70970.4	517.09	53881.5	50517.3	408.51	56659.5	46681.4	282.13	132677	218655	1707.02	48526.5	48229.1	560.7	127014	189300	1034.18	65326.5	53533.5	517.09
18	42030.8	46057.5	680.85	46549.5	36803.3	436.99	116444	199491	1319.87	37187.2	33080.4	468.14	73908.8	110481	557.14	55407.8	34229.4	561.59	44347.5	45241.4	486.83	70473.8	53272.7	1363.48	54453	53834.3	356	86604	112662	713.78	113724	165905	1029.73	71933.2	52903.4	1306.52
19	40889.2	39312.2	489.5	43026	33418.6	392.49	71271.8	89607.9	989.68	51813.8	56766	532.22	60443.2	80643.8	738.7	70815	51640.5	685.3	148968	112805	1787.12	52765.5	36544.3	1392.85	75432	114435	578.5	210281	185974	10649.7	185918	257562	2333.58	68429.2	57218.1	664.83
20	51972.8	62238.6	643.47	101120	77567.9	1179.25	57103.5	76996.6	558.92	68079	96550.8	906.02	60396	60942.8	625.67	44071.5	29766	678.18	41448.8	42099.7	726.24	80404.5	72518.1	2147.57	93231.8	135912	3456.76	67566	96379	376.47	132454	157436	1480.96	203498	174573	1800.47
21	42645	53323.5	373.8	46071.8	43149.9	744.93	76702.5	121509	827.7	34617.8	33173.9	286.58	46969.5	38937.5	282.13	68915.2	42999.5	875.76	95141.2	128693	5067.66	224109	167228	2831.98	58904.2	64037.3	2971.71	72843.8	70891.2	1971.35	67358.2	80582.4	602.53	104211	124531	782.31
22	34946.2	19739.3	349.77	59958	53432.9	708.44	71692.5	101850	1607.34	37609.5	29617.4	250.09	59654.2	46989.3	477.93	44489.2	33030.6	717.34	54531	62211.9	542.01	38569.5	33122.2	998.58	107052	137819	330.19	59138.2	46874.5	352.44	55397.2	68933.2	704.88	98630.2	66548	1189.93
23	48249.8	64002.6	403.17	114984	66712.6	846.39	83140.5	95008.4	728.02	44334	35980.9	461.91	204318	262143	1611.79	114188	89828.6	1430.23	46228.5	42972.8	282.13	88653.8	116987	1221.08	58813.5	75221	1755.97	125114	160228	560.7	111410	169209	351.55	95148.8	93309.4	2535.61
24	50020.5	51418.9	505.52	43487.2	36838.9	919.37	88264.5	180184	952.3	55437	72765.5	492.17	77257.5	141438	996.8	69432.8	54898.8	635.46	105870	174848	1855.65	153400	127667	2002.5	262143	262143	32928.2	134665	82012.6	1765.76	67779.8	106263	1410.65	91975.5	94274.1	1634.93
25	39220.5	40310.8	828.59	103215	87464.8	1333.22	67251	84545.5	303.49	57249.8	95032.4	702.21	129447	184421	2412.79	46314.8	32800.1	905.13	63992.2	64896.1	1315.42	74794.5	63966.1	528.66	77260.5	106647	4662.71	97641.8	95998.1	5768.98	77757	163019	397.83	87732.8	115000	656.82
26	53820	58585.1	1435.57	72682.5	65451.5	906.91	114910	88175	1558.39	46275.8	57498.4	1180.14	77521.5	101743	385.37	100406	70862.7	768.96	93846	173900	2848.89	60329.2	45044.7	930.05	74110.5	96512.5	2816.85	154860	67435.3	5784.11	8469.75	12091.5		58302.8	57286.6	1892.14
27	74946	105187	1007.48	60056.2	43367	486.83	126563	179725	1375.94	46901.2	60920.5	671.06	69948.8	89967.4	437.88	45822	15129.1	61.41	87698.2	83166	1270.03	60564.8	69970.9	603.42	72765	102674	1593.99	189297	184682	14844.3	60270	75346.5	914.92	141668	97425.6	1710.58
28	41429.2	42027.6	669.28	56664	39202.7	617.66	157770	158920	3849.25	72430.5	84331.1	1435.57	66084.8	82428.2	848.17	56010.8	42477.9	218.94	77473.5	123662	5906.93	88236	76009.6	1799.58	46040.2	17540.1	100.57	70527.8	65959.7	384.48	62250	25851.8	216.27	68365.5	61213.3	315.95
29	42357.8	33781.7	1045.75	101202	71292.6	1064.44	121372	185462	1239.77	35641.5	32242	250.98	73911	118291	1180.14	97267.5	73232.8	1143.65	53422.5	62453.1	1513	53539.5	36134.9	835.71	153159	171679	1751.52	72286.5	56745.5	859.74	77958	119108	2181.39	39618.8	32501.9	302.6
30	34906.5	40269.8	323.07	44375.2	31101	893.56	61137	67430.9	465.47	42964.5	44171.6	471.7	110104	171997	393.38	69081.8	68832.6	875.76	45584.2	51394.8	1052.87	45054.8	50362.4	190.46	100562	187033	284.8	120980	110527	1979.36	103834	90061.8	2049.67	66092.2	64724.4	2448.39
31	43070.2	41404.6	430.76	69692.2	63778.3	768.96	49776	53367.1	435.21	42894	41183	534	56103.8	70287.8	396.94	45807.8	25097.1	278.57	108224	103916	1333.22	102562	125721	8402.49	76834.5	143170	335.53	89540.2	65185.4	1982.03	56054.2	69745.7	454.79	51166.5	39474.2	835.71
32	33813	21083.2	311.5	58979.2	49656.7	516.2	56955	72684.5	425.42	31932.8	38901	308.83	78131.2	73619	840.16	111928	103926	2892.5	72141	109638	1972.24	74317.5	59611.3	1659.85	138274	168769	434.32	120149	119472	1016.38	115314	168591	1703.46	99859.5	86289.9	2646.86
33	35923.5	24234.7	315.06	44084.2	21709.8	333.75	76143.8	104671	3252.95	62813.2	78823.7	1297.62	71538	120073	766.29	52475.2	33243.3	299.04	48916.5	61078.9	962.98	83817	61314.8	376.47	52578	78399.2	289.25	113607	106565	1255.79	154341	262143	3835.9	119260	147220	1285.16
34	51722.2	58768.5	889.11	46875	19442	299.93	59637	68707.1	505.52	34572	38622.4	137.06	67516.5	65646.4	281.24	45990	38659.8	983.45	38127.8	44330	970.99	36279	28660.7	283.91	94967.2	186540	1068.89	68854.5	83988.4	3251.17	49812.8	93874.5	526.88	80772	72036.6	1639.38
35	40017.8	29908.4	12.46	45336	36534.5	477.04	117314	161620	1188.15	38730.8	31470.4	237.63	149847	178174	1549.49	40218.8	29534.7	476.15	91959.8	155902	4527.43	180760	174290	6777.35	60845.2	117457	890	80317.5	61959.1	680.85	73942.5	115087	825.92	68907	54634.4	669.28
36	37691.2	39843.5	201.14	44817	26920.7	470.81	116914	121685	1167.68	35987.2	44088.8	424.53	56624.2	78371.6	721.79	56975.2	44019.4	752.94	53442.8	82369.5	288.36	54790.5	40138.1	479.71	262143	262143	10901.6	176150	161314	1382.17	58759.5	62073.1	109.47	69673.5	69583.8	1791.57
37	48870	50997.9	568.71	87704.2	82283.2	930.94	60377.2	91298.9	202.03	66556.5	64979.8	213.6	140469	195859	621.22	68311.5	59297.1	671.06	62836.5	54913.9	660.38	121305	124128	1912.61	162440	216554	8762.05	212091	204974	29697.5	89207.2	104916	751.16	63641.2	45487	1031.51
38	45172.5	71761.6	785.87	37686	28745.2	560.7	63028.5	78706.3	1519.23	38470.5	45416.7	681.74	88664.2	116232	501.96	43071	33778.2	524.21	51214.5	37278.5	1191.71	95604	120364	1070.67	59874.8	55882.2	634.57	199988	194316	3284.1	93618.8	124866	1096.48	73731	65208.5	292.81
39	34903.5	31174.9	1185.48	43884.8	36324.5	444.11	132296	211249	1302.07	114043	157798	3744.23	94353	146208	1476.51	39527.2	34370	401.39	33419.2	23118.6	408.51	112431	99887.4	2366.51	147940	143336	893.56	127947	84316.8	1398.19	74321.2	75761.2	542.9	122823	115209	2337.14
40	33896.2	23197.8	167.32	71200.5	47176.2	595.41	70762.5	103742	517.09	81920.2	87154.1	1383.06	102832	125985	775.19	104762	90356.4	1608.23	45018	60015.4	1115.17	43542.8	31751.6	1061.77	125416	174944	1456.04	73157.2	54587.3	801	203894	262143	9081.56	65088.8	49985.1	1193.49
41	66520.5	83872.7	1363.48	62099.2	35928.4	958.53	75042	106730	849.06	75876.8	79639.9	889.11	66066.8	62611.5	95.23	131140	114889	2857.79	50500.5	64330.1	1526.35	119440	61006.8	2785.7	107466	111967	3314.36	64309.5	58593.1	1256.68	59975.2	66277.4	464.58	120000	69565.1	1163.23
42	46917.8	65150.7	544.68	47100	39419.9	478.82	63591	52445.9	491.28	45390	54525	649.7	58021.5	59520.5	785.87	101114	117767	1645.61	33130.5	26859.3	574.05	43446.8	30003.7	539.34	49976.2	37781.4	283.02	262143	262143	15209.2	87147.8	130858	1050.2	124705	49947.7	706.66
43	62175.8	67785.1	1071.56	41826	30323.2	574.05	65004	87537.7	1072.45	93162.8	86343.4	1490.75	65019	84887.3	219.83	44844	40318.8	987.01	33236.2	45756.7	327.52	55708.5	37907.8	436.99	186286	223471	4228.39	59591.2	38669.6	233.18	160936	170541	2077.26	71310.8	49212.6	3914.22
44	57309	82812.7	2028.31	139650	121645	2696.7	80772.8	91148.5	602.53	78639.8	120568	3682.82	76773.8	106697	421.86	101014	83366.3	2056.79	50767.5	47160.2	801	70503.8	55198.7	2450.17	153705	237351	3449.64	152176	118895	2081.71	76262.2	101395	736.92	70602.8	106266	703.1
45	51462.8	50204	526.88	97318.5	77595.5	2598.8	130712	152406	1143.65	51111.8	54970	1755.08	51975	32898.8	186.01	107986	75269.1	1172.13	69184.5	49511.6	266.11	80964	70177.4	1755.97	163047	262143	1906.38	88767	80506.7	525.1	57690.8	79512.6	1260.24	161280	125382	2564.09
46	44811	34605.9	502.85	107587	83920.8	1234.43	92494.5	102642	945.18	90643.5	168780	1569.07	55965.8	59645.1	409.4	80018.2	60468.4	2454.62	49611.8	53492.6	528.66	115241	121246	4948.4	81996	186304	1326.1	134306	77818.9	1467.61	158334	253433	4838.04	83327.2	57178.1	642.58
47	14808	24967.2	125.49	123764	110294	1448.03	88209.8	124675	1679.43	47810.2	51409.1	640.8	102375	156075	1145.43	40344	30861.6	508.19	32957.2	24058.5	638.13	102457	68894	1102.71	84657	80076.9	2568.54	94557	84137	1025.28	101327	103433	1226.42	116476	87382.9	3080.29
48	46729.5	45842.1	453.9	86892.8	73699.1	854.4	64727.2	56866.6	121.04	39629.2	34889.8	671.06	97071	171938	2639.74	62534.2	44908.5	1085.8	104093	146222	1537.03	54296.2	42188.7	687.08	70012.5	108514	577.61	66625.5	68475.7	804.56	60057.8	70456	767.18	48033	80372.3	617.66
49	50856	58503.3	320.4	43493.2	29405.6	253.65	60732.8	64944.2	393.38	46055.2	53214	815.24	83508	127832	1583.31	38043	25695.2	406.73	47802.8	60401.6	175.33	39522	31658.2	461.02	51301.5	62415.7	686.19	94620	95424	1509.44	66358.5	77402.4	147.74	75894.8	75703.4	4039.71
50	54516	51043.3	523.32	59014.5	50930.2	242.97	64506	78644	648.81	41965.5	48029.7	647.03	63393.8	86807	423.64	56019.8	44387	189.57	38687.2	39105.7	753.83	41260.5	26567.4	79.21	86289.8	102263	1418.66	67165.5	35312.5	175.33	156045	231495	2698.48	120088	134661	1575.3
51	45623.2	58139.2	606.09	60322.5	49967.3	1059.99	154988	229957	4333.41	186136	193579	2388.76	108740	160988	1244.22	78502.5	67096.2	1340.34	49844.2	44394.1	1303.85	37827.8	36523.8	329.3	82479.8	143895	1720.37	149143	123180	341.76	64213.5	81842.6	528.66	204050	150316	2064.8
52	35866.5	30336.5	113.03	47021.2	26505.1	469.03	147106	205274	1395.52	103821	152534	2530.27	58557.8	62567.9	1068.89	59355.8	47065.9	393.38	125226	169746	2519.59	46484.2	31201.6	1292.28	132447	193142	1561.06	74763.8	50210.2	943.4	58486.5	70705.2	387.15	62637	51905.7	590.07
53	34020	31103.7	457.46	49303.5	33792.4	558.03	90918.8	103035	1931.3	121255	146823	1549.49	69307.5	89031.1	830.37	105320	56470.5	1552.16	39758.2	44598.8	331.97	36114.8	39609.4	91.67	58335	66501.7	412.07	88599	62922.1	987.01	59310.8	71176	577.61	64071	56662.7	1421.33
54	40456.5	49379	383.59	47494.5	40683.7	1056.43	66649.5	113746	575.83	42486.8	56049.5	434.32	53268	49737.6	151.3	72032.2	57166.5	934.5	47917.5	54192.1	1406.2	67871.2	71804.3	1107.16	93703.5	193630	1721.26	90441	110356	1023.5	78894.8	106504	1370.6	172386	91473.3	2768.79
55	49377	51572.8	869.53	59874	47169.1	798.33	87741.8	116125	716.45	67119.8	99919.4	753.83	63960	74056.9	465.47	44055	30512.8	501.07	106024	70181.8	352.44	62400.8	56515.9	2364.73	72000	123968	4256.87	108304	73874.4	654.15	77003.2	78293.3	659.49	84984.8	78475.8	521.54
56	46123.5	59218.8	856.18	86793.8	111114	2517.81	79316.2	115675	247.42	69635.2	83576.3	445	65460.8	88721.4	566.04	81696	89643.5	1266.47	35935.5	37603.4	120.15	53187	46016.6	1191.71	59025	63339.5	1434.68	42310.5	28222.8	526.88	70449.8	83216.8	1105.38	82598.2	67766.4	2589.9
57	60001.5	85384.8	1294.06	40239	27766.2	445	79643.2	101561	511.75	63907.5	73400.1	614.1	68283.8	85003.9	249.2	77169.8	57865.1	1466.72	53301.8	73633.3	1580.64	61447.5	50357.1	1429.34	105603	133322	1244.22	59751	42438.8	573.16	61815	63158	271.45	65970	57108.6	554.47
58	35160.8	27508.1	331.08	71611.5	85053.7	1600.22	89834.2	110430	1157	69686.2	99027.6	459.24	163830	237037	612.32	46730.2	34365.6	1606.45	75184.5	92200.4	5922.95	64625.2	56024.6	670.17	72222.8	78301.3	1040.41	94429.5	67505.6	566.93	100973	182458	2611.26	88008	89607.9	992.35
59	46740.8	59305.1	710.22	51093.8	32234.9	-25.81	71485.5	99526.9	1030.62	39633	31295.1	339.09	164374	225549	1879.68	52999.5	40875.9	846.39	98881.5	108194	1271.81	133837	94429	4933.27	32176.5	41624.4	137.06	79788	72551	478.82	49484.2	28882.3	167.32	95914.5	100071	2477.76
60	48675.8	60570.7	501.07	126405	77291.2	1023.5	58587.8	71832.8	469.92	33488.2	28126.7	86.33	73430.2	121644	383.59	54936.8	49610.4	1240.66	50807.2	59884.5	417.41	155797	149166	6039.54	58670.2	64515.2	2767.01	79008	96897	2052.34	57507	61177.7	563.37	41424.8	34368.2	171.77
61	34614	44233.9	356.89	57347.2	46453.6	648.81	75307.5	110265	1008.37	42833.2	42632.8	420.97	84713.2	123124	252.76	79377.8	56149.2	1470.28	44179.5	40074.9	1441.8	150561	136059	1653.62	65292	85108	291.03	67659	88010.3	749.38	103534	115453	2094.17	71510.2	61313.9	534.89
62	47010	45541.3	553.58	68881.5	45874.2	585.62	138516	122382	1157	49225.5	55487.1	445	54816	61353	372.91	65261.2	52495.8	1216.63	42480.8	57758.3	423.64	78945	55296.6	1270.92	71357.2	99598.1	1011.93	79685.2	102544	679.96	123504	171561	1408.87	44082	34608.5	161.98
63	57219	91856.9	733.36	49457.2	38781.8	1037.74	29571.8	88460.7	1002.14	36439.5	28862.7	315.95	85373.2	139380	1034.18	41206.5	26526.4	366.68	55941.8	52704	1034.18	262143	262143	16424.9	51262.5	56143	1088.47	75350.2	48440.9	1325.21	76280.2	101504	1031.51	138552	104911	4862.96
64	37591.5	30847.4	371.13	67562.2	46306.7	810.79	67302.8	103993	309.72	72632.2	77242.2	878.43	101290	127324	304.38	44409.8	25523.4	284.8	128927	215481	4918.14	103003	114474	2620.16	50250	53232.7	640.8	81926.2	78156.2	1076.01	65086.5	71766.9	1736.39	115421	93048.6	1325.21
65	43689	46147.4	671.95	54759	37613.2	558.92	81726	115609	1982.92	37787.2	32005.3	192.24	115984	158227	3178.19	77889	56332.6	825.92	38948.2	23018.1	296.37	97834.5	66656.5	2194.74	95370	223674	5220.74	39112.5	23725.6	235.85	66051	79447.6	525.1	51216	36118.9	537.56
66	56585.2	65522.7	224.28	44499	28476.4	660.38	124895	158076	992.35	73272	75885	1473.84	58943.2	60971.2	268.78	62465.2	46423.3	631.01	41316	51744.6	505.52	65363.2	57333.8	2731.41	82626.8	162635	576.72	72069.8	69690.6	448.56	107186	180854	493.95	61097.2	46514.1	1157
67	45026.2	52421	1335	50513.2	44065.7	1787.12	144663	262143	4114.47	38342.2	33960.6	52.51	57214.5	61613.8	355.11	53473.5	36293.3	1032.4	63399	75720.3	766.29	36739.5	23923.2	569.6	258843	262143	12075.5	116493	147739	1808.48	127846	157691	2752.77	74114.2	82003.7	892.67
68	34824	27929.1	550.02	44280	27366.6	339.09	76197.8	99725.4	1463.16	41604	38950	1102.71	90623.2	129718	1223.75	39271.5	31919	414.74	59957.2	85480.9	1197.94	52842	23587.7	614.1	70504.5	110607	1095.59	96649.5	85559.3	1587.76	119589	223613	3950.71	130244	143691	4814.01
69	36716.2	26027.2	161.09	118771	75756.8	1139.2	61605.8	62051.7	170.88	34152.8	30466.5	288.36	59367.8	75449.8	426.31	74850	60256.6	409.4	170037	262143	3090.97	74655.8	64690.5	712.89	45642	57168.3	311.5	45711	39217.8	689.75	95319	146595	807.23	104836	101868	852.62
70	62069.2	64748.4	703.1	41242.5	26142	567.82	99036.8	164492	3480.79	33634.5	34431.4	361.34	74055.8	104018	862.41	49558.5	32582	171.77	61361.2	70996.2	824.14	151946	165430	2937	145224	260899	1754.19	57766.5	57096.2	1703.46	74312.2	101793	957.64	262143	197070	5271.47
71	135496	200326	6682.12	55308.8	30584.8	376.47	79970.2	99289.3	1161.45	41298.8	46741.9	582.06	62195.2	81834.6	888.22	65535.8	61590.7	1343.9	70730.2	74709.3	3051.81	36551.2	48582.4	1301.18	130521	145550	1621.58	84174	78699.1	1344.79	138653	232616	2119.98	75594.8	46534.5	1448.92
72	42933.8	46443.8	1035.07	46941	32194	465.47	82964.2	115186	676.4	39768	41061	125.49	49372.5	59939.7	255.43	45573.8	37296.3	650.59	38666.2	50442.5	346.21	182693	154401	5305.29	131846	157930	1888.58	161124	213456	1661.63	155054	246225	2194.74	64271.2	58133.9	952.3
73	32880	38426.6	247.42	148852	156684	2091.5	101715	115825	1351.91	65705.2	90610.9	811.68	76457.2	81016.7	738.7	43119	30235.1	455.68	45397.5	59257.1	763.62	89443.5	85219.3	1171.24	140814	153418	1110.72	103199	99987	1043.08	76987.5	102793	1307.41	123133	148102	580.28
74	46870.5	45373.1	557.14	110081	81572.1	1180.14	79616.2	141966	1693.67	44055	51587.1	576.72	57119.2	79058.7	477.93	98388.8	87971.2	1059.99	34486.5	37971	497.51	125593	65539.6	1915.28	65891.2	89804.6	616.77	52180.5	45700.6	460.13	112901	146628	1612.68	59935.5	41297.8	667.5
75	39065.2	37139.7	308.83	40926	30689	648.81	75959.2	97156	606.09	38253	26625.2	330.19	79327.5	104707	508.19	105482	81372.7	2602.36	71072.2	84064.9	15989.7	88332.8	106237	3608.95	101443	154004	3433.62	41846.2	56063.8	577.61	97897.5	130113	1157	40120.5	24205.3	272.34
76	51666	67256.4	371.13	49145.2	35333	1142.76	87659.2	122670	6296.75	49390.5	62329.4	776.08	89888.2	164513	905.13	80678.2	65449.7	1738.17	71783.2	110694	356.89	95577.8	103523	5426.33	153519	238067	1569.96	79886.2	110413	891.78	131797	171379	4215.93	65034.8	60366.9	781.42
77	33891.8	22112.9	62.3	147652	74592.7	1287.83	78038.2	93733	1985.59	40726.5	54683.4	455.68	80730	116083	837.49	48496.5	48007.5	532.22	54722.2	104636	1488.97	65913.8	42243.8	2707.38	95257.5	156548	2463.52	75838.5	64126.3	2777.69	58185.8	65140.9	607.87	140079	165848	11020
78	56688.8	60399	698.65	37680	23000.3	614.1	68964.8	89070.3	437.88	72516.8	111038	2141.34	61764.8	55792.3	389.82	60303.8	38226.4	643.47	46119.8	44869.3	436.99	46231.5	28871.6	442.33	94594.5	123580	637.24	80838.8	75763.9	842.83	92517.8	142821	4410.84	55481.2	64586.4	239.41
79	68929.5	115347	992.35	65730	52853.5	851.73	87741.8	137300	1510.33	40486.5	45016.2	467.25	84564.8	98285.4	712.89	50423.2	39696.7	1259.35	48755.2	102007	425.42	63565.5	38092	238.52	79794.8	117518	1059.1	70056	68107.2	1461.38	233368	262143	5024.94	71607	65619.7	4981.33
80	68295.8	82375.7	1300.29	66086.2	50249.4	704.88	53466.8	88245.3	689.75	40231.5	24705.5	640.8	66439.5	81975.2	720.01	61572	53607.4	1035.96	68019	93514.1	2717.17	49090.5	32209.1	426.31	94337.2	106634	256.32	47681.2	56074.4	620.33	98542.5	158475	1363.48	82026.8	55058.1	881.1
81	59394.8	78819.3	3052.7	93732	88508.7	2479.54	76361.2	121000	1022.61	41033.2	41075.3	442.33	54452.2	60398.1	262.55	42219	22189.5	61.41	72572.2	101751	836.6	73637.2	57334.7	1808.48	91401.8	163929	1280.71	99900	99615.9	1302.07	160610	229886	3914.22	74252.2	66483	1600.22
82	33189.8	34831.9	743.15	87738.8	69630.9	1171.24	159690	211082	1905.49	66368.2	90948.2	1537.03	115014	180237	2150.24	90564.8	78577.2	1358.14	61215	69413.8	630.12	110104	71209.8	2467.97	245803	262143	55298.4	126709	112360	1165.01	125314	168801	898.01	119616	207411	6679.45
83	68570.2	96322.9	1094.7	58185	48933.1	1969.57	73519.5	98426	1044.86	37220.2	24664.6	159.31	69641.2	87597.4	609.65	44600.2	42150.4	1504.1	31368	29845.3	630.12	217792	178522	2354.94	208035	262143	2858.68	91770	85393.7	6398.21	61397.2	85319	1447.14	140348	144024	1828.95
84	36912.8	42052.5	911.36	47049	39885.3	267	72790.5	101687	668.39	53991	65072.3	1645.61	136546	134113	851.73	70766.2	54610.4	816.13	31463.2	28921.4	210.93	99677.2	76752.7	3979.19	85234.5	126307	2604.14	110008	146269	4145.62	97128.8	135319	1013.71	111132	108956	898.9
85	33584.2	24822.1	167.32	103642	88912.8	1010.15	77454.8	106570	431.65	35161.5	30379.3	129.94	66677.2	91401.2	464.58	45376.5	31509.6	510.86	58694.2	74059.6	1046.64	100968	90107.2	4600.41	77255.2	86557.8	802.78	41951.2	32291.9	601.64	136445	262143	8245.85	109757	108618	809.9
86	43129.5	56135	519.76	53588.2	42558.9	530.44	165350	237320	1464.94	45017.2	47820.6	479.71	74889.8	106928	663.05	111080	98449.1	3621.41	56631	58661.7	590.96	45879	51080.7	282.13	80236.5	28326	6025.3	83332.5	87236	774.3	100203	186880	1533.47	84982.5	76446.5	3183.53
87	40383	40305.4	1907.27	63939.8	54151.2	817.91	59979	64996.7	411.18	37802.2	35581.3	291.92	131572	165982	2877.37	57459	39669.1	780.53	54523.5	72642.7	1885.02	69273.8	51137.6	3023.33	68601.8	78660.9	2420.8	74820.8	65196.9	1626.92	70767	39826.6	777.86	43923.8	58692.8	295.48
88	39555.8	42315.1	636.35	45393.8	34500	719.12	87479.2	112871	769.85	44557.5	40891.9	801.89	56796.8	67603.5	305.27	86681.2	58524.6	1173.91	52850.2	54759.9	1141.87	48179.2	44149.3	514.42	55869.8	46562.1	230.51	86476.5	80351	582.95	105083	132792	861.52	57442.5	53056.5	131.72
89	65505.8	93709	1058.21	69218.2	65851.1	658.6	119590	159996	3378.44	33702.8	32056	852.62	117840	162746	2094.17	67892.2	45008.2	1136.53	67986.8	90445.4	1027.06	44862	33436.4	602.53	70125.8	81812.4	523.32	134732	118936	5793.9	95556	142642	1028.84	50978.2	52907.8	509.97
90	43767.8	47631.9	625.67	64824	56457.1	666.61	75692.2	103797	810.79	49095.8	55021.6	1006.59	87819	117383	1932.19	41828.2	27952.2	436.1	31801.5	38332.3	469.03	57818.2	67802	3243.16	63008.2	87621.4	520.65	82851	71823.9	582.06	74616.8	104365	531.33	66871.5	63372.4	1655.4
91	39068.2	41866.5	522.43	64242.8	49898.7	404.95	96198	136357	835.71	61338	47150.4	1365.26	52380	73137.5	1519.23	65906.2	47552.7	1277.15	95100	149067	1504.99	51420	42252.8	870.42	142499	184953	15436.2	159926	144227	8717.55	106970	197671	6499.67	84112.5	65043.9	239.41
92	134163	161660	2729.63	48292.5	33737.2	1011.93	71456.2	109140	2032.76	35586.8	30397.1	335.53	57736.5	67464.7	310.61	54023.2	43667	490.39	37324.5	39085.2	303.49	182300	119620	2208.09	94560.8	101255	2529.38	74198.2	47901.6	701.32	103480	134255	4215.04	48138.8	49823.1	476.15
93	75590.2	75944.6	262.55	68699.2	46490.9	991.46	82824.8	107452	149.52	48028.5	57831.3	630.12	75882.8	111246	469.03	83637.8	68986.6	977.22	78852	129662	1344.79	40289.2	23213.9	309.72	77778.8	98341.4	1542.37	76887	84303.5	1743.51	109591	171224	2297.09	185922	130933	3803.86
94	34254.8	34149.3	446.78	41511.8	32703	1087.58	90411.8	100592	767.18	57327	70358.1	632.79	62356.5	81638.8	275.01	180895	150283	5587.42	58974	74466.3	761.84	102874	87418.5	1330.55	67671.8	91201.9	287.47	70965	89178	1373.27	172574	148591	5323.98	84034.5	64181.5	1862.77
95	41862.8	51232.8	373.8	77707.5	65833.3	833.04	61216.5	75045.7	679.07	84657.8	144028	1281.6	125083	177717	1068	52083.8	42579.4	1003.92	30603.8	50311.7	256.32	125642	89655	1136.53	61941	57165.6	155.75	77689.5	60114.2	505.52	77087.2	38140.9	491.28	75727.5	62648	841.94
96	34960.5	24746.4	370.24	66717.8	55653.5	387.15	78147.8	92871.5	700.43	43209	50703.3	558.03	97410.8	120695	773.41	72750	64699.4	1093.81	47296.5	46209.7	520.65	99163.5	90791.6	1139.2	48392.2	47068.5	564.26	171161	169724	2425.25	219775	262143	3079.4	70692	84525.1	730.69
97	55226.2	69576.6	1282.49	76221.8	61081.6	2750.1	78639	112906	498.4	52778.2	89701.3	849.95	63235.5	80310	438.77	125668	88898.5	1405.31	37463.2	33548.6	962.98	77289	49264.2	2281.96	118080	179926	1593.1	120511	106670	1523.68	97569.8	143586	914.03	61649.2	60661.5	1189.93
98	56290.5	68086.8	837.49	56682.8	49963.7	655.04	44723.2	34066.5	321.29	50044.5	61676.1	580.28	61347	63784.5	64.97	45372.8	23309.1	47.17	46280.2	50560.9	938.95	45350.2	31292.4	132.61	144868	205412	2857.79	164958	155461	3050.03	101482	149472	574.05	118720	165459	2404.78
99	42295.5	49734.1	369.35	68058	41163.4	1567.29	102431	109011	509.97	39849.8	41320.9	413.85	85397.2	146496	1874.34	71854.5	51976	689.75	43023.8	47122.8	344.43	79954.5	48838.8	742.26	68376.8	70073.3	712.89	34680.8	38140.1	85.44	137537	186018	1373.27	81856.5	80192.6	1189.04
100	41147.2	46010.3	825.92	55139.2	48416	266.11	72873.8	106988	768.96	52365.8	73773	152.19	77619	97620.5	257.21	76925.2	73415.2	1282.49	71920.5	97900.9	1097.37	138301	100552	4086.88	65228.2	75076.8	777.86	70619.2	79073.8	450.34	148455	142667	1944.65	108213	97800.3	4343.2
101	38424	41765.9	768.96	51721.5	35222.6	193.13	70633.5	111320	982.56	42735	43247.8	823.25	53358.8	60686.4	415.63	47529.8	41725	585.62	48873	69067.6	827.7	64227.8	52195.8	1536.14	67011	78894.9	487.72	74144.2	65757.6	2990.4	189102	262143	3026	93534	76600.5	500.18
102	34839	25612.4	309.72	80992.5	68076.1	1734.61	96180.8	128923	670.17	67278.8	81511.5	1040.41	211547	262143	2794.6	49860	39690.4	491.28	44172	53836.1	275.01	101193	61776.7	1574.41	62612.2	74663.9	783.2	153039	160136	4436.65	86930.2	148396	2750.1	43278	31484.6	368.46
103	50533.5	59672.7	1051.09	92429.2	68238.1	1529.91	102944	157785	2505.35	41640.8	43569.1	219.83	87030.8	81533.8	1321.65	68310.8	51267.6	1801.36	32924.2	29132.4	270.56	152206	123901	1718.59	66147	76354.9	261.66	202742	235602	1875.23	94050.8	115818	705.77	241787	224762	4454.45
104	46191	53212.2	458.35	45977.2	37574.9	477.93	130842	189092	2533.83	36244.5	47958.5	399.61	106025	160192	1367.04	50802	38384.8	1006.59	90017.2	91931.7	552.69	69330	54719	87.22	135244	171848	484.16	68561.2	63178.4	347.99	98655.8	140171	3333.94	65872.5	89090.8	1650.06
105	47429.2	53260.3	1332.33	61540.5	48415.1	1047.53	56416.5	80495.2	548.24	44061	46455.3	1258.46	102488	162906	1682.1	100645	81532	3000.19	63467.2	81783.9	5770.76	57703.5	37150.4	334.64	102827	126981	2338.03	60417.8	47746.7	435.21	114454	159475	1640.27	78864	57995.1	344.43
106	57168	66477.7	747.6	60792.8	54104.9	573.16	94311.8	94700.4	665.72	52326.8	64231.3	391.6	145234	188151	1217.52	47810.2	38915.2	617.66	44041.5	42448.6	1893.03	95368.5	106108	6545.95	61053.8	66354.8	1133.86	64463.2	68752.5	821.47	87888.8	100806	1002.14	76358.2	80236.2	2610.37
107	35172	38881.4	349.77	63846	46523	422.75	61628.2	76078.1	156.64	54600	74516.1	687.08	68671.5	88934.1	582.95	112017	82469.2	1974.91	120214	149494	1366.15	48311.2	30243.1	467.25	80673.8	105539	1157	101993	97775.4	1361.7	119586	162624	2078.15	117187	121239	3843.02
108	35643.8	32482.3	615.88	70361.2	62219.9	976.33	73122.8	107828	572.27	80961.8	81249	413.85	97185	178087	2405.67	57954	42790.3	648.81	105465	145177	1971.35	219896	195286	2939.67	59752.5	85239.8	404.06	78573.8	64170.8	786.76	105338	141475	1514.78	118891	106336	1440.02
109	34660.5	36513.1	970.1	69506.2	47673.7	1307.41	86159.2	123474	2000.72	79492.5	116926	954.08	67318.5	95038.6	552.69	63359.2	50492.4	558.03	87971.2	98324.5	951.41	48033.8	45522.6	1174.8	64242.8	59205.5	574.05	70146.8	69974.5	3528.85	127437	177722	1778.22	58822.5	51338.8	213.6
110	38253.8	27773.3	304.38	142085	113804	2545.4	127249	147953	1286.94	35841	42299.9	1125.85	59538	77588.4	542.01	42267	30470	458.35	57879	69342.6	675.51	72597.8	53044.9	2224.11	55968	69166.4	1068.89	173176	212567	3808.31	78599.2	169686	816.13	110881	122918	3158.61
111	56443.5	68059.2	1003.92	54969	39890.7	369.35	111928	127150	1257.57	61451.2	82007.3	1108.94	100469	144200	1982.92	74712.8	75921.4	1595.77	68262	77260.9	1318.98	89541	89347.1	2512.47	113622	176896	5499.31	36206.2	33777.3	365.79	175227	230516	6738.19	74142	58286.1	693.31
112	42453.8	51134.9	888.22	130374	165010	899.79	71439.8	82067.8	1561.06	50217.8	68914.5	1132.08	102040	171021	1287.83	172396	113204	2520.48	34341	44867.6	282.13	240410	206596	2707.38	60903.8	57440.6	573.16	50687.2	44796.4	907.8	88517.2	104055	1068	176610	149150	4908.35
113	39329.2	49470.6	386.26	47950.5	38302.9	801	62709.8	84131.7	649.7	42643.5	43473.8	774.3	87792.8	149078	834.82	82995.8	68639.5	1695.45	50236.5	63268.3	2236.57	40142.2	60834.2	871.31	67552.5	83952.8	3603.61	73233	68222.1	706.66	101254	105361	2309.55	54961.5	46262.2	337.31
114	51363	65148	445	47823.8	28841.3	461.91	92308.5	106950	747.6	72291	91606.8	904.24	84033.8	121729	982.56	62028	48736.4	1935.75	93727.5	108008	10798.4	82806.8	74446.7	12790.2	96114.8	198698	4199.91	69978.8	64380.8	1986.48	93970.5	138523	418.3	65568.8	60926.7	715.56
115	71853.8	57633.7	246.53	65990.2	52657.7	921.15	68365.5	101762	689.75	47529	57486	460.13	53695.5	105337	779.64	41109	27711.9	434.32	36564	30223.5	301.71	70238.2	51304.9	1985.59	50802	65350	858.85	71397.8	53918	792.99	156134	194045	6472.97	42459.8	38677.6	1449.81
116	55307.2	64332.8	611.43	54309	44324.7	548.24	47622	53480.1	399.61	38343	41563.9	506.41	44501.2	48076.9	580.28	78918.8	80711.4	1077.79	47631.8	54839.1	871.31	114875	104986	2023.86	71678.2	82311.6	3425.61	93045.8	128140	3734.44	77860.5	85178.3	436.1	113761	102792	2896.95
117	31896.8	21380.5	105.02	50969.2	38634.9	743.15	69504	96675.4	1705.24	48753.8	59475.1	556.25	80353.5	135478	873.98	74791.5	70256.6	715.56	32256.8	33844	290.14	58323.8	53994.5	298.15	142334	251197	7055.03	92780.2	94858.9	3236.04	68123.2	82855.4	795.66	73878.8	78841.5	2079.93
118	34555.5	32298.1	218.94	51885.8	37664.8	577.61	143763	170640	2880.04	36785.2	14759.8	363.12	71472.8	106951	208.26	76689	47604.3	287.47	64219.5	62707.6	2354.94	52302	43040.4	1373.27	124887	170172	1321.65	70150.5	80089.3	248.31	141719	173189	469.03	44766	46279.1	522.43
119	103844	124468	886.44	51618.8	42548.2	566.93	56275.5	53430.3	678.18	48403.5	59385.2	594.52	64547.2	101460	560.7	41337.8	25739.7	490.39	38920.5	40175.5	122.82	115576	80059.1	3014.43	106929	96416.4	821.47	103566	104206	1648.28	101191	89377.4	238.52	62224.5	70535.2	2702.93
120	44477.2	50166.6	575.83	68143.5	43497	541.12	157168	216718	2832.87	36576	22679	419.19	54154.5	55106.1	416.52	146539	82333.9	1468.5	43921.5	19928	145.07	43099.5	29385.1	401.39	81024	110913	986.12	96594	72010.8	1143.65	126156	243840	11764.9	58719.8	66175.1	257.21
121	54708.8	66949.4	637.24	52481.2	19525.7	647.92	67187.2	82812.7	727.13	64660.5	77228	284.8	159857	262143	3037.57	81858	73061	1462.27	72779.2	91078.1	3212.9	54907.5	46706.3	250.98	64442.2	87675.7	188.68	83722.5	75317.1	2134.22	98750.2	127176	1246	120462	112077	3066.05
122	40551.8	52136.2	701.32	40500.8	31966.1	543.79	52927.5	62564.3	407.62	56109	74726.2	1035.96	65250	76557.8	534.89	78252	66378.9	789.43	59445.8	74938.9	1990.04	45501.8	37971.8	186.01	112515	152484	1704.35	88005.8	79477.9	818.8	148520	183475	1271.81	115861	73577.2	4036.15
123	35932.5	35458.5	267	76042.5	59176.1	2409.23	53212.5	62761	334.64	37514.2	39937.9	280.35	67916.2	98143	573.16	49641.8	40740.6	1311.86	53588.2	96792.8	387.15	48573.8	42493.1	913.14	183484	262143	681.74	64509.8	51481.2	497.51	141647	262143	7271.3	56139	41526.5	1194.38
124	44596.5	49322.9	1106.27	105039	84024.9	1062.66	58789.5	65079.5	512.64	41913.8	48048.4	159.31	102731	162568	1497.87	167542	97726.4	9289.82	145681	247038	2588.12	64338	50409.6	796.55	55133.2	58381.3	2378.97	68500.5	62866	681.74	130787	225239	3084.74	176417	134150	2175.16
125	42101.2	35960.4	364.9	40224.8	22871.2	591.85	75990	104414	834.82	43499.2	56047.8	403.17	111100	189879	353.33	43320	32305.2	1120.51	56763	76526.6	1005.7	65058	38685.6	1364.37	52052.2	58621.6	804.56	64417.5	38916.1	275.9	68346	73470.4	113.03	153638	171775	3934.69
126	36837	26390.3	596.3	82519.5	72244.9	965.65	78871.5	97436.3	846.39	35647.5	40604.5	1092.92	131410	192477	381.81	68045.2	67208.4	2168.04	45468.8	56550.6	1124.96	56171.2	62163.8	1449.81	117660	200055	4015.68	75501	83172.3	1244.22	134442	184420	1314.53	62621.2	59086.2	251.87
127	45029.2	66010.4	1095.59	61920.8	41852.2	680.85	187145	262143	677.29	34593.8	38796	317.73	83390.2	112841	556.25	43689	30877.7	717.34	90980.2	91195.6	928.27	85781.2	76775	2531.16	83836.5	130538	242.08	241444	214780	3487.02	135512	176754	2983.28	149026	137970	3299.23
128	47718.8	51259.6	692.42	46170	18721.2	274.12	97708.5	123924	555.36	40839.8	45220	463.69	135153	202447	1227.31	125284	98714.4	2129.77	36365.2	41733	320.4	257492	252535	4586.17	84939	111432	2525.82	124235	126955	400.5	127926	200348	1730.16	106909	148074	1271.81
129	36216.8	41075.3	716.45	75636	64431.6	1997.16	59951.2	59395.9	368.46	48875.2	68407.2	578.5	61831.5	83894.1	516.2	79475.2	57291.1	1540.59	39448.5	31300.4	619.44	77809.5	68508.6	913.14	119567	167055	2886.27	109773	102514	4749.04	77419.5	86256.1	1577.08	84779.2	99571.4	3070.5
130	31871.2	27291.8	344.43	67023	55671.3	2751.88	75621.8	136393	532.22	37605	35779.8	288.36	63678.8	86916.5	765.4	70806	39179.6	1092.03	58023.8	124030	3762.03	103028	55017.1	2275.73	119159	176525	2808.84	77218.5	92641	543.79	100647	123637	844.61	99829.5	85559.3	2813.29
131	46389.8	37539.3	411.18	73816.5	53721.3	1157.89	70676.2	97447.9	1406.2	35317.5	24605.8	181.56	62666.2	59033.7	566.93	90519	93173.2	1298.51	37428	37540.2	158.42	107459	100742	3356.19	96103.5	135143	4943.95	93240.8	50331.3	1642.05	160072	238473	6292.3	101645	119075	1229.98
132	34689	30124.7	599.86	108526	84435.2	1937.53	59163.8	82064.2	418.3	40774.5	51706.3	910.47	77592.8	86862.2	1028.84	44579.2	33365.2	623	62976.8	94221.6	4535.44	155644	107970	1035.96	103321	169399	976.33	112358	88781.1	1124.96	115274	218507	1007.48	140532	179683	7592.59
133	51541.5	41638.6	832.15	52999.5	42048.9	380.03	59362.5	72851.8	1061.77	45560.2	48230	162.87	68191.5	100873	366.68	45225.8	40503	264.33	94620.8	114107	1694.56	108244	167741	768.96	60306	89231.4	1026.17	85961.2	47917.6	658.6	80558.2	119717	871.31	39963	48872.6	726.24
134	45401.2	48382.2	550.02	47141.2	38358.1	584.73	56874	29583.6	183.34	46887	63141.1	227.84	57950.2	62357.8	214.49	59912.2	60539.6	906.91	57351	91452.8	2428.81	157552	148354	1563.73	253868	262143	9361.02	84648.8	91221.4	828.59	96751.5	164013	1692.78	90545.2	68114.4	423.64
135	50180.2	69874.8	1699.9	66261	57572.3	1019.94	85097.2	123244	1074.23	33606.8	24151	488.61	53264.2	60020.7	308.83	44835.8	23904.5	467.25	62135.2	58497	2403.89	95009.2	132762	11935.8	55962	48796	404.06	45690	60690	473.48	19173	144644	1523.68	117370	113885	1379.5
136	262143	262143	8845.71	51245.2	36340.5	469.92	154289	137295	930.05	88962.8	99026.7	2144.01	154802	155964	2578.33	62229.8	60906.3	729.8	62965.5	62866	836.6	63499.5	53490.8	1157	103502	161820	329.3	99808.5	83532.7	1371.49	129976	192374	2945.9	101426	97698	461.02
137	54362.2	77036.6	672.84	37653.8	23350.9	376.47	59037	72033	555.36	103470	129407	2511.58	59095.5	72697	403.17	42920.2	26862	717.34	60859.5	78676	1530.8	150058	110121	1604.67	98838.8	123900	1251.34	95432.2	94049	2167.15	68645.2	207987	4033.48	85317.8	77962.2	2149.35
138	41371.5	25325.8	274.12	81852	64220.6	1518.34	95834.2	139135	1717.7	68052	77476.3	2512.47	86871.8	135835	1038.63	57951.8	56635.1	1121.4	42773.2	57140.7	208.26	78469.5	71097.6	280.35	84914.2	122212	1454.26	70358.2	67359.6	720.01	85796.2	103863	1064.44	58617	71443.9	1900.15
139	32285.2	22113.8	284.8	56511	43470.3	799.22	57421.5	50752.2	263.44	40851.8	39596.1	760.95	118460	181030	4529.21	62397	59312.3	603.42	31652.2	39224.1	346.21	133294	111173	2106.63	71480.2	109168	1313.64	48079.5	52052.5	361.34	101044	133595	1442.69	62688.8	68016.5	610.54
140	52269	48635.8	590.07	40147.5	29286.3	363.12	70380.8	90462.3	421.86	44835.8	60338.4	356.89	119737	93026.4	1051.09	70330.5	65407.9	2129.77	110278	136464	2506.24	47492.2	30261.8	105.02	57258.8	72565.3	1119.62	136793	83160.7	593.63	52349.2	36789.9	202.03	109045	95338.6	1359.03
141	54333	59022.1	593.63	121204	75240.6	1584.2	111508	153223	1206.84	47668.5	52905.2	371.13	152620	216735	523.32	123007	100844	2601.47	61950.8	87460.3	2020.3	89895.8	58182	1914.39	99405	164599	284.8	68221.5	53886.8	315.06	149795	262143	9424.21	101211	116028	1876.12
142	36082.5	42696	711.11	84284.2	56293.4	850.84	120956	179413	1351.91	74766.8	58239.8	735.14	67727.2	97277	1089.36	52856.2	47512.6	447.67	66234.8	89512.6	313.28	74700	89061.4	3901.76	84658.5	119509	6248.69	141918	137126	1032.4	87220.5	127548	1276.26	114349	110882	1838.74
143	42062.2	55031.4	478.82	44500.5	32018.6	110.36	87909.8	128432	1636.71	36429	28850.2	127.27	106384	121346	1444.47	64833.8	46080.6	2063.02	79903.5	99660.4	1069.78	128602	101451	1758.64	94281	110680	1556.61	113172	119227	9955.54	159966	260005	1031.51	90648.8	73355.6	1709.69
144	33558.8	27599.8	280.35	193553	128494	2065.69	51079.5	43537	410.29	40548.8	59338.1	907.8	104676	140709	939.84	73472.2	57460.2	1565.51	43090.5	57410.3	1714.14	73359.8	76161.8	5963	92541	136158	364.01	148756	136533	613.21	66285	89272.3	253.65	242131	262143	10746.8
145	86287.5	103685	4118.92	61618.5	45695.3	639.02	101863	144824	1606.45	34146.8	31902	294.59	75795.8	114345	555.36	51058.5	39859.5	562.48	43529.2	38481.8	550.91	144532	116609	2923.65	56313	61277.4	1353.69	59428.5	62754.8	2086.16	69330	112581	416.52	80853	73048.5	1795.13
146	40919.2	34568.5	477.04	43947.8	26529.1	757.39	76876.5	115480	835.71	37981.5	29393.1	248.31	72442.5	111178	869.53	51843	46702.8	958.53	55627.5	85606.4	1432.9	99597	94233.2	4962.64	44187.8	38731.9	325.74	120824	82871.5	1081.35	85461	116863	907.8	79233	68689.3	1032.4
147	99399	111834	2276.62	66138.8	37335.5	1308.3	82711.5	104528	639.91	38550	55417.6	924.71	92462.2	89074.8	720.01	89712.8	80245.1	1365.26	31116	39693.1	464.58	72726.8	63008.4	4760.61	76158.8	105082	623.89	77645.2	84870.4	1164.12	55674.8	55735.4	482.38	73626	62599	1464.05
148	41658.8	51161.6	485.05	50510.2	39099.5	540.23	84240	113998	575.83	44493.8	55252.1	445	73982.2	102013	841.94	50661.8	34974.3	1108.05	59125.5	60851.1	826.81	75140.2	62766.4	1773.77	52593	80947.3	250.98	109711	62408.6	1049.31	65293.5	85725.7	520.65	47668.5	33288.7	76.54
149	42737.2	57267.9	480.6	54662.2	39540	234.96	92441.2	144009	1786.23	113496	183836	1515.67	106975	145719	3625.86	159480	162914	2627.28	42993.8	57241.2	550.91	179738	206548	7921	97303.5	116507	344.43	64416	82362.4	773.41	89384.2	94444.1	583.84	75219.8	74962	1507.66
150	36059.2	43366.1	387.15	80874.8	62146.9	2696.7	69540.8	97643.7	561.59	47328.8	64169	795.66	100522	123315	687.97	46486.5	36796.2	315.95	43934.2	57411.2	667.5	61581.8	53125.9	776.97	92709	145468	2132.44	91701.8	48585.1	412.07	105122	164079	344.43	74169.8	46900.3	1320.76
151	45863.2	57603.5	1111.61	59715.8	39795.5	1268.25	66747.8	88478.5	1104.49	63173.2	67081.1	1445.36	67846.5	96876.5	653.26	62430	43297.6	1607.34	53163.8	67009	891.78	115596	117232	2075.48	104488	133137	5096.14	87456	95022.6	565.15	87132.8	143679	1997.16	61694.2	56625.4	644.36
152	35397.8	31932.3	340.87	43895.2	32323.9	299.93	68931.8	104166	638.13	49310.2	73681.3	2150.24	52346.2	43109.8	287.47	45025.5	39047	404.06	75927	89189.6	3079.4	114265	76646.8	3268.97	58352.2	89910.5	700.43	137917	178069	2961.03	73011.8	86467.9	62.3	118226	85796	3204.89
153	49450.5	54319.4	681.74	50031.8	41807.8	685.3	100703	123076	1020.83	48456.8	61498.1	1083.13	89419.5	89570.5	1423.11	77475.8	67089.1	1545.04	52659	48685.7	1535.25	118017	118698	5288.38	73919.2	91690.5	744.93	48352.5	52189.6	229.62	59816.2	63879.8	1253.12	262143	262143	5775.21
154	74109	110083	1028.84	64009.5	56075.3	504.63	60348	65558.3	790.32	43359.8	51972.4	832.15	79503	113345	1941.09	218584	167170	4758.83	97736.2	136482	1667.86	73842.8	84564.2	1731.05	97689.8	113364	816.13	111793	76414.5	2548.96	77143.5	108277	1251.34	160148	180739	1546.82
155	34482.8	37325.7	402.28	45041.2	32049.8	604.31	68682	85908.1	554.47	37456.5	39856.9	632.79	131984	250905	2942.34	43001.2	22852.5	339.98	42404.2	48969.6	1101.82	130059	85827.1	1205.06	74949	110075	1485.41	60175.5	52647.9	1274.48	186668	245206	3100.76	208539	171300	3466.55
156	37594.5	46839.8	1190.82	49976.2	38805.8	421.86	68325.8	97733.6	1256.68	35775	30657.8	242.97	125216	209305	2454.62	128314	101263	3567.12	64827	92560.9	1869	81507	74548.2	389.82	140441	213351	527.77	61448.2	46045.9	1242.44	78562.5	128263	2364.73	77979	102851	943.4
157	38229.8	41028.1	797.44	39417.8	31934.1	965.65	85874.2	113603	889.11	46490.2	41146.5	216.27	73686.8	100724	372.02	56564.2	49152	58.74	51803.2	68571.8	833.04	86936.2	97286.8	3958.72	148746	198208	2993.96	63748.5	64367.5	439.66	184462	216439	4861.18	71925.8	45277	768.07
158	42786	46178.5	589.18	56311.5	45814.5	890	101074	135010	1016.38	46129.5	53823.6	526.88	82221	147337	1244.22	86658	66409.1	1002.14	57950.2	96096.9	1400.86	116981	98973.3	1333.22	49457.2	49667.3	414.74	59660.2	56603.1	2668.22	61205.2	79363.1	771.63	43113.8	26778.3	439.66
159	55898.2	56418.9	809.01	58682.2	38448	662.16	122149	190554	586.51	163127	262143	3935.58	88800.8	140044	243.86	66759.8	49109.3	1508.55	80922.8	122708	1541.48	57954	51031.7	1124.96	146393	131445	2194.74	74612.2	51095.8	1788.01	132005	186799	1282.49	96171	98108.3	804.56
160	56005.5	74883.7	910.47	125372	83069.9	4001.44	83867.2	149147	1016.38	52225.5	59119.1	362.23	77271.8	118267	707.55	60603.8	51338.8	600.75	58060.5	72236.9	1100.04	37784.2	33683.8	527.77	75928.5	66666.3	2411.9	113302	81464.4	1328.77	52320.8	35188.8	283.91	58516.5	45125.7	649.7
161	68466	92699.7	1808.48	51239.2	42793	592.74	89606.2	83013.9	619.44	32936.2	26345.8	482.38	60973.5	73211.4	374.69	72788.2	72597.3	707.55	49020.8	53762.2	606.98	105926	87096.3	2200.08	55842	53370.6	454.79	103793	91677.1	3606.28	149905	259051	2713.61	138637	131734	1913.5
162	42596.2	52366.7	507.3	53627.2	63005.8	1103.6	90733.5	123818	795.66	38806.5	33925.9	523.32	86706	109598	283.02	70638.8	46509.6	1000.36	71807.2	93309.4	2150.24	103864	66758.9	1809.37	164072	146372	6548.62	81680.2	62400.6	672.84	188570	262143	4209.7	80636.2	63653.7	1019.94
163	47567.2	50863.5	513.53	67845	66237.4	1260.24	139226	194323	1964.23	35636.2	26320	231.4	126736	218526	506.41	81451.5	69160.1	1075.12	62040	66683.2	743.15	167156	172142	2539.17	86808.8	127428	3160.39	47907	47307.9	1365.26	82218.8	93115.4	2183.17	44114.2	30871.4	546.46
164	37230.8	41469.6	323.07	111808	81445.7	1403.53	81396.8	107596	1464.94	52809.8	62365.9	728.91	55930.5	55872.4	413.85	55389.8	41025.4	194.91	41039.2	43433.8	422.75	62248.5	47885.6	1265.58	247787	262143	1589.54	101987	61925.3	2461.74	59866.5	63740.9	414.74	73377	64025.7	1055.54
165	45066	52390.7	435.21	52031.2	38197	1194.38	73036.5	93483.8	724.46	72701.2	68951.9	1270.92	121906	92730	545.57	64380	61543.5	1547.71	31014	28083.9	265.22	48720	47932.7	266.11	54045	62488.7	466.36	61587	72867.9	3039.35	66399	120539	1187.26	233380	262143	2354.05
166	46022.2	57053.4	2288.19	84078.8	69161.9	428.98	67878.8	82746.9	2895.17	50733.8	73037.9	556.25	59502	59052.4	354.22	67814.2	51593.3	1049.31	52002.8	59303.4	2612.15	62531.2	46707.2	244.75	262143	262143	5070.33	90028.5	57091.7	623.89	73410.8	107242	233.18	182512	216366	1305.63
167	31800.8	32289.2	334.64	104671	120180	1529.91	86188.5	128945	343.54	42694.5	52488.6	510.86	105028	167025	289.25	64376.2	45958.7	595.41	50071.5	59780.4	982.56	97298.2	75525.4	580.28	153478	208710	1827.17	56023.5	32716.4	608.76	54859.5	30432.7	144.18	86241.8	57111.3	2050.56
168	62889	74889	1090.25	73626.8	73813	1955.33	59566.5	79193.1	517.09	172823	235743	5168.23	131260	186481	1502.32	39741	33249.5	504.63	108500	132837	515.31	64128.8	49152	248.31	73929	99211.9	1596.66	57873.8	86918.3	6135.66	51405.8	37587.4	232.29	65937	65810.2	756.5
169	44771.2	43270.9	652.37	56793.8	42927.4	1321.65	72606.8	93711.7	740.48	37443	41919	72.09	141940	220565	1772.88	80353.5	88718.8	1980.25	29758.5	30785.1	386.26	51084.8	47862.4	415.63	51148.5	45365.1	565.15	70432.5	64880.1	2283.74	48661.5	44712.7	405.84	112409	92343.7	1476.51
170	39807	34770.5	129.94	65511	56272.9	541.12	61593	70861.8	423.64	142824	210724	2777.69	94068.8	162060	846.39	60801	51367.2	1114.28	83205.8	83454.4	1084.91	38991.8	30019.7	472.59	56716.5	49997.5	1635.82	84195.8	89790.3	7864.04	50772.8	20861.6	274.12	59084.2	48331.4	687.08
171	37944.8	38432.9	353.33	39396.8	32424.5	332.86	87074.2	94345.3	1143.65	43350.8	51513.2	479.71	65969.2	84734.2	86.33	106346	80059.9	2483.1	43355.2	43932.2	291.03	70102.5	46482.9	1087.58	191236	175317	2289.08	119284	103615	2524.04	75480	94850.9	788.54	194243	178139	6834.31
172	34545.8	36518.5	424.53	42941.2	28532.5	445.89	113578	138249	1082.24	58132.5	79528.6	574.94	92926.5	155100	306.16	131531	113920	6530.82	58650	87076.7	712.89	75726.8	70361.6	2957.47	72906	87457.6	1344.79	86363.2	96233	1162.34	118812	170199	2516.03	66747.8	57012.5	2095.95
173	51462.8	57120.2	265.22	100787	68922.5	438.77	109825	138313	2263.27	37236	36315.6	374.69	114802	187445	1687.44	59613.8	43403.5	443.22	56431.5	63603.8	3168.4	86148	66726	850.84	57531	73909.2	1681.21	75031.5	65438.1	414.74	95676	133188	1251.34	262143	262143	27266
174	47919.8	62122	139.73	46809.8	36155.4	967.43	55926.8	68211.4	349.77	41949	54929	598.08	119190	208255	1927.74	75763.5	56145.6	135.28	205097	262143	2385.2	51228	44304.2	217.16	78279	98842.5	761.84	159346	132954	842.83	144401	206052	7989.53	69137.2	77266.2	1882.35
175	33974.2	31235.4	345.32	53842.5	39402.1	1384.84	94917.8	133440	381.81	35814	29192	154.86	85482.8	134853	1917.95	61528.5	42019.6	315.06	74385.8	50907.1	871.31	113711	73804.1	1224.64	117500	172316	1992.71	75489	77213.7	956.75	81468.8	130120	2995.74	44750.2	39403	343.54
176	60423.8	72842	900.68	52316.2	44816.8	745.82	66911.2	89927.4	1041.3	36819	48307.4	442.33	80878.5	115417	1166.79	68223	75506.7	840.16	64989.8	83382.3	1435.57	56993.2	52014.3	465.47	52570.5	59926.4	1003.03	47074.5	37552.7	432.54	122235	208644	2973.49	51645	52971	1141.87
177	71289.8	80059.1	1330.55	74729.2	78863.8	868.64	62831.2	79395.1	327.52	45696.8	65019.8	71.2	115324	228524	2316.67	72270.8	49112.9	503.74	47370.8	46806.9	599.86	108892	114203	1788.01	262143	262143	15794.8	82753.5	64747.5	634.57	48302.2	41769.5	1179.25	95270.2	51466.9	1558.39
178	32710.5	23674.9	212.71	42810.8	23718.5	109.47	87177	122595	986.12	80023.5	99449.5	2046.11	64299.8	62121.1	113.92	71808	47545.6	360.45	71846.2	116636	811.68	215600	163384	8539.55	73731	113637	314.17	93247.5	85031.5	461.91	43685.2	65510.2	806.34	156256	161912	1217.52
179	38052.8	17388.8	11.57	51942	43539.7	349.77	101199	180611	914.03	51646.5	55523.5	558.92	59059.5	73805.9	684.41	104145	72008.1	794.77	147442	183591	2114.64	207551	103810	4696.53	76874.2	124171	614.99	78345.8	96666.5	992.35	56760	68024.5	684.41	80455.5	139075	1323.43
180	38038.5	37193.1	298.15	41040	19411.8	366.68	56063.2	68354.7	617.66	60537	64840.1	728.91	89295	115320	1626.03	62662.5	47946.1	380.03	38861.2	48288.7	1179.25	80469.8	99680.9	2730.52	78780	134216	1124.96	98744.2	85000.3	806.34	174340	247922	3913.33	54005.2	40260.9	439.66
181	36339.8	40772.7	1197.94	86607.8	61839.9	883.77	62142.8	81759.9	343.54	41831.2	49096	601.64	64080	70426.6	486.83	75904.5	58577.1	1693.67	64987.5	87017.1	1399.08	59068.5	50613.4	668.39	118533	176258	1596.66	117474	111113	1932.19	78448.5	53032.4	110.36	105724	119162	4484.71
182	53316	47105.9	534	59891.2	45058.9	501.96	64878.8	79930.9	516.2	39408.8	40200.4	534	109484	183389	2177.83	65617.5	71275.6	2026.53	79658.2	131604	3696.17	84732.8	94535.8	5724.48	139910	231184	1758.64	56082	43678.5	220.72	59109	55741.6	178	99750	133836	900.68
183	44853.8	54210.8	581.17	103674	64451.1	1333.22	118197	164043	1267.36	41733.8	43414.2	277.68	65853	49973.5	165.54	77291.2	72725.5	1739.06	58573.5	68941.2	1425.78	82668	72139.8	2142.23	53378.2	52307.1	204.7	54533.2	42483.3	793.88	87745.5	124954	1214.85	64317.8	52210.1	2576.55
184	43623.8	55280.6	655.93	56887.5	32741.3	1383.95	94126.5	139484	681.74	262143	262143	12728.8	100406	102860	3614.29	66705	57204.8	495.73	51959.2	65376.7	652.37	86110.5	81584.5	843.72	48877.5	57293.8	493.06	262143	262143	44335.3	157177	226888	14904.8	156021	120560	3896.42
185	43931.2	53782.7	728.91	84241.5	65520.9	270.56	86679	117854	2221.44	40538.2	47034.7	573.16	76566	118998	858.85	67239	49929	2011.4	82147.5	93993.8	3474.56	98962.5	52692.4	5025.83	65025.8	73047.6	772.52	79206.8	82471.9	437.88	206770	262143	4437.54	134819	203245	5278.59
186	46881	50967.6	618.55	78381.8	64282	802.78	149204	239588	2611.26	33185.2	38414.2	404.95	90758.2	98277.4	629.23	68042.2	48436.5	782.31	56400.8	92374	1224.64	57615	56814	2281.96	73088.2	69698.6	1007.48	141268	139912	4223.94	108392	158571	1970.46	79298.2	71014.9	4690.3
187	34686	24564.9	814.35	117865	114524	1985.59	87541.5	135844	840.16	112814	134145	696.87	141254	247791	2976.16	102168	62816.2	728.91	61365.8	61704.6	607.87	61478.2	46264	1440.02	101158	132079	2505.35	147428	118288	4469.58	46947	55730.9	686.19	99223.5	118720	2532.94
188	34079.2	33698.1	410.29	58886.2	51972.4	628.34	57691.5	63667.9	470.81	34571.2	33796	168.21	94220.2	144552	749.38	84420	61928	1264.69	201884	262143	11597.6	109071	91153.8	2070.14	103229	119072	1746.18	172426	115292	971.88	68246.2	49661.1	260.77	64074.8	62796.6	1362.59
189	53274.8	77072.2	460.13	81356.2	76347.8	905.13	63525.8	78911	836.6	55232.2	57888.3	1264.69	73428	113024	1150.77	110355	74811.6	1043.97	49151.2	53845.9	376.47	79003.5	54752.8	740.48	50809.5	47539.3	221.61	37200	29552.4	226.95	105540	161092	899.79	47264.2	38966.9	891.78
190	44758.5	49136	72.09	57082.5	47022.3	147.74	78810.8	109992	591.85	51400.5	88685.8	966.54	62170.5	98291.6	460.13	66573	54068.4	776.97	61897.5	85880.5	4391.26	65655	48084	436.1	56835.8	67514.5	454.79	60414	52993.3	1212.18	211864	262143	28212.1	90291	89192.2	812.57
191	37041.8	37715.5	1188.15	42457.5	33252.2	309.72	78908.2	102856	991.46	58961.2	94051.6	1780.89	63559.5	85401.7	1144.54	64731	55430.1	1596.66	37890	42736.9	659.49	138055	100149	5161.11	129080	164334	3179.97	49895.2	49210.8	524.21	89588.2	123782	822.36	145924	114907	5734.27
192	103024	135081	6897.5	66333	58505	1567.29	188620	262143	3351.74	39273	42527.8	386.26	103968	135857	1003.92	55149.8	50625.9	203.81	38674.5	29130.6	89	45233.2	32489.4	376.47	103806	146355	380.92	62703.8	52510.9	655.04	55449	70524.5	737.81	58142.2	52942.5	577.61
193	48711.8	44751.9	659.49	75899.2	62090.8	347.1	66557.2	84650.6	1021.72	56292.8	44682.4	985.23	121837	163432	432.54	47438.2	40419.3	1399.08	35371.5	33194.3	540.23	66835.5	54349.6	1889.47	39778.5	52165.6	136.17	54373.5	60498.6	906.02	98517	152608	1437.35	110336	113757	2046.11
194	44613	40980.9	409.4	183080	88765	1567.29	58125	54962.8	111.25	55812.8	61571.1	1210.4	126208	162393	1939.31	116712	113849	3385.56	132043	169783	1512.11	41583	31106.4	938.06	120182	141673	2866.69	81925.5	90210.4	1017.27	254576	230060	4249.75	58527.8	38919.7	1005.7
195	54531	70357.2	828.59	143590	101006	1817.38	70014	86694.9	97.9	46825.5	50954.3	796.55	76802.2	101555	656.82	78595.5	64653.2	1974.91	109365	198352	3195.1	68556.8	51633.3	790.32	50467.5	63245.2	207.37	145624	164983	1193.49	94963.5	166241	890	175161	149169	4141.17
196	39480.8	52107.7	972.77	239298	194664	3006.42	54213	61113.6	279.46	41121	44968.1	744.04	55788.8	75529	391.6	66065.2	68851.3	2148.46	28527.8	37625.6	493.95	242225	262143	8878.64	64620	79550	570.49	45746.2	33262	396.05	164133	172391	3163.95	98476.5	65308.2	4145.62
197	16284	76168	1128.52	57603	38314.5	396.05	100077	146714	1040.41	33522	36505.1	389.82	89819.2	115399	504.63	82424.2	51121.6	1010.15	42575.2	58623.4	584.73	45876	36382.3	1934.86	53670	50289.4	1191.71	65241.8	47986.1	594.52	51213	43691	222.5	115295	116659	1552.16
198	43045.5	50699.7	815.24	90449.2	68257.7	431.65	70491	115645	1638.49	47427.8	51544.3	669.28	69588	99795.7	2395.88	55717.5	48592.2	1121.4	74771.2	117759	5657.73	170187	136920	2268.61	103156	121449	970.99	147628	119990	2264.16	125155	262143	602.53	72667.5	91823.1	1207.73
199	36540	50971.2	320.4	64763.2	38994.5	278.57	88625.2	97973	1562.84	43522.5	42976.3	412.07	73210.5	95242.5	946.96	45435.8	30112.3	368.46	34323	37222.5	134.39	65118	58569.1	674.62	107002	181389	1017.27	70472.2	102694	1240.66	262143	262143	3762.03	56358.8	52669.3	1238.88
200	56565	58939.4	642.58	51810.8	40246.7	611.43	63482.2	79227.8	1157	32547.8	20582.1	-14.24	123739	134358	1019.05	61780.5	44874.7	1230.87	59163.8	101577	2758.11	85953.8	80051	1036.85	174314	232936	8803.88	198574	220262	2741.2	74865.8	97763.8	653.26	91425	84758.3	2852.45
201	35323.5	12307.8	78.32	48972	42457.4	525.99	137776	154318	1512.11	50457.8	62782.4	719.12	87021.8	124583	723.57	45322.5	24957.4	176.22	42010.5	41077.1	1849.42	72608.2	89455.7	965.65	54532.5	70742.5	1044.86	35787.8	39231.2	227.84	73870.5	95411.6	1108.05	56274	43523.7	104.13
202	54903.8	52535.8	668.39	42842.2	37391.6	342.65	84139.5	111172	584.73	61033.5	63157.1	1536.14	122885	167866	1200.61	72637.5	56058.4	999.47	78045	147275	1359.92	123271	98724.1	1718.59	47910.8	59538.3	423.64	204438	232074	1198.83	108744	110348	1516.56	149082	134507	2444.83
203	35930.2	27351.5	499.29	91782.8	75949.9	258.99	52708.5	47143.3	324.85	60401.2	103778	1708.8	50445	49653.1	284.8	42807.8	30199.5	402.28	40177.5	59681.6	2378.08	149578	116729	4987.56	153575	157807	1452.48	75806.2	77892.8	1636.71	134000	212134	504.63	90021	91023	839.27
204	58452	72444.2	849.06	75447	57395.2	1788.9	201914	262143	4639.57	48456	55072.3	441.44	74316.8	109028	451.23	96261	107914	1883.24	52283.2	81409.2	669.28	83388	56509.7	1589.54	115256	191077	1484.52	62063.2	52923	754.72	95560.5	67147.8	917.59	74841.8	66798.9	1593.1
205	35006.2	25559	195.8	42489.8	30805.6	385.37	77967.8	143348	507.3	44948.2	52946.1	722.68	105050	156468	1131.19	201545	199422	2707.38	101323	150874	4819.35	41339.2	36767.7	734.25	57306	63491.7	320.4	166976	161289	6876.14	106216	168400	4610.2	41262.8	40881.3	1278.04
206	34374.8	28716.7	361.34	51804	40763.8	854.4	58892.2	66993	757.39	69910.5	87233.4	784.98	145234	189157	3066.05	120311	99656	2872.03	34966.5	32707.5	475.26	36144	29609.4	405.84	70392.8	88600.4	1271.81	112616	128267	6473.86	155055	262143	1755.97	82331.2	65840.4	1788.01
207	60939.8	55543.1	781.42	85651.5	76149.3	995.91	58347	72102.5	428.09	34107	30385.5	153.97	122082	182905	1406.2	120235	113874	1679.43	57131.2	76491.9	2440.38	262143	262143	6058.23	141674	169560	1445.36	112072	117092	882.88	58926	72345.4	511.75	118844	58569.1	1294.95
208	38574.8	23841.3	108.58	56922	45323.2	485.94	86227.5	122684	711.11	44440.5	67956.8	1713.25	59564.2	80590.4	278.57	46767.8	36765	586.51	43039.5	54580.1	319.51	200216	119470	2446.61	131421	214879	1351.91	132805	131763	2592.57	64911	79792.1	761.84	58270.5	47363.1	247.42
209	35979	33165.8	692.42	37411.5	19285.4	349.77	145526	142291	1399.97	44096.2	52963	242.08	47344.5	42287.5	229.62	63172.5	58171.3	163.76	63692.2	90107.2	1401.75	114174	79546.4	775.19	70595.2	82156.8	1041.3	134164	99826	568.71	67993.5	107949	403.17	39191.2	31499.8	379.14
210	37035	30696.1	219.83	64944.8	56814	1004.81	89073.8	165953	306.16	36598.5	30842.1	83.66	80060.2	116428	736.03	44565.8	31445.5	793.88	67089.8	92357.1	441.44	132591	100478	589.18	84261.8	126190	755.61	97423.5	77571.5	238.52	61734	40771.8	10.68	65933.2	52581.2	590.96
211	41430.8	35750.4	770.74	54016.5	40754	1155.22	57181.5	52071.2	119.26	56094.8	57842	611.43	81946.5	147255	1167.68	65052	47571.4	925.6	43984.5	53026.2	601.64	50187	36379.6	408.51	81857.2	126414	2476.87	68488.5	67307.1	692.42	79941	152424	315.06	86318.2	118762	1541.48
212	39962.2	40392.6	494.84	49161	38898.3	486.83	65646	86941.4	780.53	48857.2	58938.5	388.93	76163.2	101452	811.68	83198.2	73150	1021.72	56511.8	81904	1537.03	58618.5	44139.6	2157.36	192584	262143	3285.88	96832.5	96352.3	921.15	88670.2	158750	835.71	65518.5	53864.6	2777.69
213	46731	53958	910.47	68284.5	57950.6	768.96	91662	141063	1175.69	34497.8	27309.7	258.99	64530	90179.2	1390.18	52282.5	41013.9	791.21	32154.8	32040.9	286.58	126760	123944	1775.55	65781.8	73929.6	539.34	74610.8	59841.8	2484.88	87105.8	109467	1593.99	46851	35995.2	226.95
214	137687	196759	2175.16	56473.5	50852.8	202.92	68089.5	96796.4	590.07	56181.8	88227.5	648.81	102157	136738	1995.38	58583.2	63850.4	961.2	36300.8	38488.1	940.73	93588.8	64368.4	387.15	48670.5	61073.6	383.59	134828	111869	1595.77	99206.2	141996	2263.27	171442	200917	5779.66
215	173356	161363	2092.39	75342	47630.1	1043.08	62511	87675.7	1511.22	35355	27760	316.84	52894.5	57612.4	265.22	59689.5	49522.3	784.98	104958	150294	461.91	75816	83039.7	3129.24	62754	81241.9	1109.83	158902	161668	9056.64	87195.8	108034	2761.67	69666	57104.2	3428.28
216	40042.5	43563.7	448.56	50274.8	37508.2	1126.74	78792	110744	685.3	44296.5	46496.3	858.85	114124	152429	1286.94	83535	75762.1	1206.84	59582.2	60915.2	583.84	47198.2	40819	1242.44	51845.2	92938.2	226.95	131816	151603	1914.39	41061.8	16707.1	52.51	152715	138164	24708.2
217	47833.5	55450.6	350.66	50106.8	28061.7	328.41	82677.8	144210	564.26	102528	146215	454.79	63733.5	72664.9	1152.55	49992	37974.5	942.51	44434.5	57552.7	285.69	181568	155601	2589.01	146965	256108	4446.44	120508	102953	5430.78	147426	262143	1765.76	45067.5	43514.8	292.81
218	31434.8	47168.2	936.28	46827.8	44177.8	377.36	92848.5	103897	843.72	43791.8	34144.8	335.53	80498.2	120404	702.21	95568	74441.4	1044.86	59430	66207.1	2673.56	90616.5	69129.9	2532.94	72034.5	86485.8	2152.91	73173	61734.8	499.29	164883	164547	3543.98	50442	44734.1	445
219	74346.8	87394.4	1793.35	43101.8	30589.3	784.98	98114.2	118741	1064.44	42262.5	49174.3	1167.68	109527	163777	397.83	55384.5	55000.2	419.19	36359.2	36055.7	558.03	43917.8	36080.6	210.04	101086	68805.9	1043.97	65857.5	60796.8	855.29	171757	215415	1823.61	57770.2	56207.9	804.56
220	43549.5	50500.4	1221.08	45972	48574.4	702.21	102060	145840	817.02	38027.2	34184.9	425.42	141693	215271	504.63	59451.8	48348.4	722.68	90505.5	112285	5869.55	248206	262143	6253.14	175700	185350	1607.34	97929.8	119493	2538.28	95388.8	134604	523.32	116271	78797	1243.33
221	39898.5	38503.2	486.83	128380	113454	1533.47	57477	69910.4	365.79	41556	28276.2	348.88	100404	113520	880.21	65205	49702.1	631.01	34981.5	35889.2	177.11	124965	93055.7	2003.39	51024	68471.3	361.34	87516.8	69681.7	727.13	78082.5	100380	616.77	87402.8	74574.9	1058.21
222	55866	71404.7	823.25	84568.5	97166.6	1302.96	68250	76218.7	166.43	58882.5	64969.1	709.33	56638.5	69427.1	828.59	69410.2	46115.3	1414.21	58188	70907.2	687.08	158735	96758.1	1907.27	94122	145606	330.19	55217.2	55061.6	67.64	150794	219690	2567.65	81405.8	62944.4	844.61
223	55087.5	62897.2	786.76	64377.8	59751.9	749.38	76344	114842	549.13	111914	126568	513.53	146564	262143	1922.4	66381	42870.4	396.05	101083	100235	3401.58	66126	62787.7	566.04	63817.5	68491.7	1486.3	74451.8	48498.8	374.69	113429	167766	2081.71	85591.5	50318.8	1150.77
224	44735.2	50211.1	897.12	43463.2	36577.2	412.07	60575.2	65289.5	372.91	87563.2	123316	558.92	55072.5	76243.6	1106.27	73557.8	80943.7	2621.05	38231.2	38609.1	425.42	39517.5	19497.2	273.23	83952.8	126195	1566.4	73587	94697.8	728.02	194916	262143	5364.92	130681	113024	3368.65
225	36907.5	32380.9	309.72	60165	61653	1196.16	108238	153308	1766.65	45189	55642.8	474.37	77617.5	174593	1532.58	45180	40540.4	1650.95	43745.2	54387	660.38	88998.8	76200	3750.46	51668.2	85245.1	866.86	87814.5	81784.8	2434.15	95080.5	179795	6681.23	98391.8	98222.2	467.25
226	54746.2	77126.5	222.5	72053.2	55338.4	1321.65	59477.2	61680.6	121.04	50719.5	50845.7	941.62	152156	144420	1084.91	49657.5	42358.7	489.5	59547	77028.6	1287.83	142423	94510	3755.8	88748.2	174870	2166.26	102952	91620.2	1857.43	148410	241117	1445.36	235403	262143	12319.4
227	50217	75462.2	1029.73	44235	23803	198.47	132665	174460	1979.36	47434.5	54774.2	939.84	108234	140026	376.47	131173	103082	1442.69	85138.5	113335	8147.95	62178	46058.4	951.41	126368	204595	3155.05	81298.5	75829.8	308.83	103492	203558	1540.59	104188	106724	4862.96
228	44054.2	40543.9	1346.57	75804.8	54397.7	1503.21	65992.5	77917.7	633.68	61917.8	79491.2	690.64	76408.5	111013	820.58	53031	46945.7	1444.47	76974	93741.9	4748.15	127823	95749.8	1296.73	116667	161242	2928.99	165591	161175	2075.48	70269	83757	1669.64	71967	57571.4	651.48
229	37698.8	26886	211.82	48769.5	33826.2	-24.92	87050.2	116283	822.36	105753	142483	2603.25	71081.2	117143	626.56	117672	118613	1558.39	35420.2	37348	776.97	70377.8	52853.5	802.78	104059	120049	1880.57	79560.8	106168	2377.19	112651	172982	1681.21	140000	133179	4474.92
230	40778.2	56483	517.98	67050.8	43132.1	1012.82	71291.2	106561	1393.74	37415.2	42287.5	438.77	103309	154843	1149.88	43587.8	29983.2	372.02	61282.5	81369.1	321.29	71871.8	77373.9	925.6	51086.2	51750.8	409.4	59116.5	58450.8	687.08	71880	43447.1	366.68	98904.8	95288.7	1103.6
231	35874.8	26380.5	238.52	94410.8	74810.7	2638.85	106210	114312	678.18	38679	50579.6	178	82903.5	114935	633.68	70361.2	58767.6	730.69	28720.5	23739	234.07	52551.8	44067.5	3327.71	101012	91866.7	4882.54	78279.8	92406.9	1337.67	118841	189801	3802.08	168980	152756	16887.8
232	86831.2	132561	1457.82	140936	125990	2488.44	117270	163288	328.41	39616.5	42218	1883.24	77901	118115	859.74	52780.5	50746	678.18	69186	90895.7	2569.43	80603.2	62356.1	1172.13	67623	71020.2	522.43	109234	108018	2615.71	50796	72911.5	1424.89	66339.8	55036.7	721.79
233	39375	39394.1	456.57	73242.8	60986.4	596.3	68592.8	99993.3	689.75	46779.8	63619.9	986.12	126688	262143	1635.82	69285	58731.1	795.66	77102.2	66487.4	1402.64	56694	48807.6	654.15	65574.8	105933	281.24	103965	63241.6	1341.23	102184	148162	1112.5	91527.8	112609	3848.36
234	41593.5	56533.7	206.48	148462	99917.6	2985.95	108712	173083	534	37881	46150.9	370.24	110499	127072	818.8	177312	143254	1331.44	37341.8	27570.4	267	60948	51644.9	1588.65	119090	120626	914.03	75294.8	71648.6	6091.16	128224	143934	1129.41	57864.8	52038.3	391.6
235	39022.5	39576.5	107.69	49725.8	42113.9	882.88	138560	222609	1978.47	47850.8	53942.9	599.86	75518.2	97010.9	540.23	78112.5	62974.6	736.03	51235.5	87133.7	1626.92	99742.5	50948.9	2297.09	60001.5	55158.6	523.32	227840	187442	4830.03	122376	151520	982.56	136798	110876	2049.67
236	51459.8	58518.4	831.26	79358.2	93935.9	4215.93	99042.8	138658	310.61	48120	54423.5	486.83	100790	155208	1015.49	66155.2	65489.8	1039.52	36455.2	58099.2	1997.16	110226	97115	1598.44	153168	217144	2224.11	54009	56334.3	717.34	101162	115720	781.42	93819	92630.3	1930.41
237	47935.5	56134.1	915.81	74523	47921.2	380.92	73186.5	99089.9	620.33	54387	89893.6	995.02	161824	252060	7543.64	82596	75413.3	1686.55	81556.5	91332.7	922.04	38724.8	28826.2	454.79	86884.5	94034.7	246.53	63996	85598.4	688.86	124700	136269	987.9	114296	99599.9	13456.8
238	149055	150442	2184.95	65653.5	47118.4	604.31	59560.5	93734.8	563.37	40028.2	42292.8	1153.44	133745	262143	1846.75	112973	84129	2468.86	46447.5	60526.2	1678.54	171916	102225	2126.21	67883.2	69515.2	154.86	106485	116040	4506.96	132318	165133	2728.74	59793	53940.2	2843.55
239	34348.5	29765.2	275.9	42252	26791.7	490.39	105348	167835	1024.39	38291.2	31425.9	74.76	78383.2	102742	819.69	70622.2	87706.8	859.74	50357.2	66022.9	914.03	55128	62898.1	728.02	71047.5	87386.4	1224.64	188703	200327	9765.08	95553.8	132672	2144.9	95507.2	115392	881.99
240	36052.5	34866.6	443.22	47763.8	35563.5	970.99	56009.2	72381.9	1027.06	72084	101013	1536.14	113127	167925	1318.09	67917	58850.4	1488.08	62034	73703.6	715.56	61366.5	45761.1	712	62943	107791	915.81	171536	260950	7355.85	82151.2	114673	2131.55	73690.5	56543.5	749.38
241	38622	37244.7	334.64	102564	93946.6	2237.46	62283.8	89613.2	600.75	90172.5	71181.3	1298.51	84222.8	122889	932.72	55887.8	43198.8	1269.14	32403.8	34609.4	716.45	74942.2	46960	1203.28	70503	111901	475.26	75504.8	85722.1	1119.62	84754.5	154937	748.49	43425.8	36583.4	389.82
242	40423.5	42031.1	485.05	49755	36585.2	458.35	75105.8	103539	664.83	35416.5	25220.8	234.96	114583	187066	1424	100761	145493	2921.87	43216.5	45420.3	347.1	78448.5	57617.7	1054.65	66714.8	109450	2134.22	178312	200048	1378.61	123784	209996	1975.8	62948.2	65682	690.64
243	35076.8	34026.5	342.65	77013	51353.9	722.68	142466	199040	5453.92	34948.5	31060.1	224.28	85494	124793	590.07	85340.2	78061	783.2	62337.8	64542.8	1649.17	131392	94149.5	1419.55	129324	224324	1916.17	47702.2	41943.9	243.86	248588	262143	25887.4	59901.8	73106.4	1019.94
244	104390	137460	1468.5	69726	49909.4	778.75	80241	91067.5	227.84	42486.8	51034.4	118.37	56170.5	59679.8	534	102390	90715.9	4174.1	58765.5	57758.3	1202.39	67602.8	55275.2	1287.83	171181	141168	1743.51	65391.8	61385.1	734.25	98220.8	146854	1856.54	57632.2	60035.8	1148.99
245	57123	68595	1030.62	158078	114826	1574.41	67953.8	77394.4	628.34	42948	55415.8	404.06	117875	143935	969.21	101576	81149.3	2451.06	55732.5	80632.2	3278.76	78875.2	55245.9	660.38	90427.5	104474	656.82	130259	105260	1888.58	162863	262143	2883.6	80393.2	113097	796.55
246	38070	26945.6	229.62	40994.2	27484.1	395.16	60027.8	51524.8	345.32	44095.5	46870.1	516.2	70530.8	90443.6	852.62	66896.2	41928.8	974.55	32962.5	36191.8	131.72	65525.2	84450.3	893.56	118579	111472	1008.37	82373.2	78700.9	3617.85	94674.8	60177.3	686.19	42051	25798.4	647.03
247	35214	37068.5	510.86	67767.8	63190	372.02	183916	254610	1877.01	47503.5	75423	703.1	168131	262143	1089.36	96985.5	61446.5	2620.16	55899.8	53031.5	1079.57	60921	42624.8	368.46	93786.8	147498	290.14	144443	169424	2226.78	188251	262143	6250.47	110008	88610.2	888.22
248	43173.8	48934	1133.86	53165.2	40443.4	366.68	65095.5	81767	631.01	56466	69236.7	1377.72	56283	49187.6	646.14	74683.5	65150.7	846.39	39072.8	42646.1	615.88	59857.5	38603.8	436.1	115796	153805	1218.41	43578	38320.7	602.53	88580.2	159419	976.33	52775.2	39467.1	623
249	56288.2	58901.1	2912.97	97140.8	66077.2	4905.68	72216	107259	1351.02	109228	147202	3423.83	83839.5	104197	782.31	47499	36039.7	776.97	32463.8	30090	315.06	102976	76693.1	1728.38	37780.5	39494.6	443.22	262143	262143	3506.6	78474.8	74676.3	520.65	52113.8	38425.8	2400.33
250	54108.8	67921.2	500.18	52019.2	38755.1	75.65	97943.2	130887	664.83	42849	43962.4	411.18	94638.8	116392	952.3	61381.5	66857.7	711.11	43878	56159	606.09	63998.2	46835.4	1749.74	55308.8	78425.9	452.12	138492	130396	1993.6	76194	155483	1521.9	72185.2	39773.2	622.11
251	35519.2	42484.1	839.27	103465	50282.3	816.13	96968.2	108173	863.3	40908.8	46154.5	605.2	69503.2	104506	436.1	88577.2	105883	924.71	56541.8	69965.6	687.08	162676	114418	1401.75	121360	170402	1454.26	114443	83828.2	1910.83	105727	166933	2585.45	69995.2	66727.8	1103.6
252	32430.8	29807.9	131.72	56089.5	40819	456.57	78700.5	128308	659.49	36803.2	33900.1	313.28	42418.5	35895.5	83.66	82649.2	78934.1	379.14	48280.5	64924.6	979.89	48068.2	32183.3	161.98	55875.8	45769.1	978.11	127689	99241.2	2257.04	48970.5	262143	258.99	74083.5	68704.4	316.84
253	52434	55734.5	241.19	62325.8	47471.7	1310.97	113278	210626	3277.87	59739.8	63998.1	547.35	61360.5	65357.1	293.7	62499	45337.5	953.19	32205.8	39796.3	602.53	62486.2	44046.1	686.19	93387	128474	841.05	76218.8	58136.6	1543.26	48163.5	83265.7	352.44	80296.5	85987.4	501.07
254	42486.8	54548.1	365.79	67068	52674.6	650.59	69057.8	98381.5	769.85	44666.2	58784.5	182.45	102377	139539	1236.21	43625.2	35997.8	801.89	55033.5	82128.3	794.77	157774	128376	1367.93	117152	130621	1795.13	148612	140588	1852.09	58131	69511.7	1185.48	69519	50115.9	242.08
255	46595.2	45125.7	310.61	78891.8	36640.4	1043.08	64806	86160.9	1532.58	44466.8	58040.5	1095.59	104894	149038	704.88	72495	70795.9	2064.8	73522.5	84152.2	1093.81	81321	105770	2768.79	87188.2	103294	1453.37	120731	112508	15431.7	150737	201707	1787.12	58287.8	53431.1	403.17
256	34701.8	27784	401.39	49227.8	40041.1	565.15	49015.5	55989	115.7	69604.5	111918	1886.8	46811.2	63280.8	376.47	104091	91500	2393.21	29441.2	33330.5	391.6	53125.5	52468.2	501.96	152113	187871	1514.78	88726.5	68808.6	1063.55	162321	260702	2119.09	73041.8	64592.6	2945.9
257	29558.2	23844	184.23	178159	165398	2334.47	61763.2	73389.4	1019.05	44501.2	48416	550.02	64946.2	91977.9	728.02	52451.2	37992.3	1085.8	112479	174174	11754.2	37627.5	31397.4	468.14	188038	262143	2467.97	74441.2	74807.2	2570.32	99748.5	122635	1078.68	63251.2	59894.3	2038.99
258	42235.5	41111.8	418.3	60716.2	50443.4	700.43	74052	100493	677.29	61869	78215.9	747.6	67248	109795	2551.63	56589.8	51029.9	1073.34	82553.2	119867	809.9	66079.5	50301.9	2477.76	75708.8	94261.7	1059.99	93214.5	98188.4	1004.81	123710	196081	1786.23	133854	114622	1593.1
259	84661.5	94253.7	1657.18	45339.8	40981.8	558.92	86642.2	95125.9	1262.02	48563.2	57915.9	517.98	227789	262143	2777.69	41310.8	25684.5	346.21	64071	80302	883.77	44829	36530.1	494.84	59454	84653.2	636.35	53036.2	37909.6	898.9	65231.2	96928.1	1188.15	71751	41183	821.47
260	36360.8	39145.8	398.72	47637.8	35640.9	658.6	91437.8	119701	615.88	44903.2	50785.2	881.1	44298	18908.9	148.63	57196.5	40690.8	804.56	100379	146999	1670.53	54067.5	45926.7	1407.98	79117.5	130697	1119.62	90402.8	106767	6804.05	77763.8	169613	2243.69	59238.8	65764.8	250.98
261	36749.2	30024.2	307.05	89074.5	87967.6	2468.86	79196.2	114838	722.68	52743	60445.2	139.73	65738.2	98984.9	1085.8	80939.2	66098.5	1627.81	88398.8	85382.1	1874.34	74054.2	51375.2	388.04	80970	90929.5	842.83	125150	103018	1326.99	102704	172415	1181.03	64854.8	55414.1	707.55
262	38817	30786	530.44	148833	135600	3929.35	69182.2	86532	744.93	41439.8	39597.9	363.12	70293.8	123527	836.6	73089.8	63619.9	1574.41	41166	54488.5	482.38	58848	47786.8	1424.89	70188.8	85221.1	575.83	37506	33013.7	260.77	119388	173020	3179.08	248947	262143	7799.96
263	32090.2	23192.5	321.29	53951.2	44605.9	619.44	143398	150806	1051.98	45777.8	38468.5	1197.05	82345.5	116069	587.4	69198.8	71172.4	1179.25	46559.2	59845.4	702.21	81549	72903.5	1726.6	112904	172853	1643.83	143282	189290	805.45	128184	226596	2908.52	134572	107906	1296.73
264	51540.8	58919.8	1026.17	45864	24055.8	865.08	100073	134287	2347.82	36594	35977.4	629.23	91077	143533	1905.49	70608	60613.4	1313.64	42966	53653.6	1204.17	82467	67339.2	2753.66	52410.8	81241.9	2364.73	74429.2	63394.7	943.4	80117.2	83246.1	192.24	67617.8	58494.4	3069.61
265	37964.2	43171.2	326.63	39592.5	19366.4	222.5	58051.5	63779.2	586.51	44089.5	56100.3	892.67	54332.2	47061.4	148.63	79314	61399.3	462.8	43681.5	54071.1	612.32	65382	58372.4	1105.38	84415.5	117538	2302.43	70680	62734.3	838.38	108544	110198	2859.57	68210.2	48656.3	833.93
266	42226.5	42082.8	434.32	72027.8	78360	1064.44	86240.2	164328	1213.07	45057.8	53343.9	612.32	99567	84271.4	796.55	95690.2	64613.1	1353.69	176195	200904	2964.59	124284	117533	2136	74316.8	96230.4	697.76	168566	190322	4723.23	76562.2	118564	671.06	77778	47686.2	1231.76
267	51267.8	56520.3	623	67777.5	45503.9	810.79	122498	156543	1440.02	53613	48722.2	634.57	72027.8	102287	1013.71	52874.2	37201.1	954.08	53674.5	79849	812.57	34945.5	21581.6	116.59	52368	63930.5	119.26	190356	166611	1755.08	130954	183311	1426.67	261806	247048	7580.13
268	54652.5	65360.7	630.12	75272.2	69578.4	1344.79	79985.2	114602	656.82	36465	33493.4	242.08	129123	190055	2206.31	63774	46237.3	682.63	38394	40415.8	761.84	213046	176746	4000.55	207849	262143	4710.77	72483.8	92558.2	1083.13	67759.5	50032.2	330.19	78680.2	55918.7	789.43
269	37956	43633.1	333.75	62986.5	44131.5	620.33	88459.5	130766	1610.9	42050.2	43578.8	1511.22	96299.2	156444	870.42	105459	87747.8	1303.85	45486.8	58679.5	582.95	74643.8	52621.2	402.28	93165	154658	1983.81	138743	124283	701.32	131891	235430	1685.66	170884	137980	6257.59
270	51277.5	59169.9	1196.16	46565.2	20261.7	327.52	64452	98467.8	1804.92	36852	26847.7	356	67833	91878.3	272.34	72856.5	60979.2	1928.63	59975.2	53002.2	272.34	71260.5	88097.5	245.64	153216	215648	566.04	52624.5	41215.9	539.34	90768.8	77042	391.6	213315	189196	2144.01
271	50775	46804.2	743.15	71739.8	53673.2	2366.51	86295	112427	977.22	72219.8	95410.7	1664.3	83192.2	110711	759.17	48597	36764.1	368.46	32521.5	30208.4	312.39	145825	112205	3689.05	262143	262143	6515.69	120418	127379	1318.09	127520	150123	1188.15	74442.8	64750.2	658.6
272	33426	23943.7	453.9	67413	48892.1	612.32	63504	84864.2	224.28	42800.2	50915.1	758.28	94426.5	139960	927.38	61392	45714.8	1039.52	47765.2	51690.3	547.35	65388	64794.7	2063.02	81479.2	104686	560.7	43986	29102.1	346.21	113355	181289	1269.14	99071.2	61900.4	837.49
273	43658.2	54555.2	853.51	44029.5	33570.8	73.87	149956	228036	1686.55	40432.5	39096.8	309.72	169643	262143	2791.93	131560	124820	2348.71	37416	50666.8	924.71	96816	94276.8	1570.85	92025	167198	408.51	46851	43383.9	441.44	104486	205602	1764.87	83828.2	107435	4803.33
274	42242.2	61281.8	1092.92	142030	162717	3341.06	55173	63088.5	440.55	41088.8	43728.4	491.28	75273.8	85067.1	497.51	68514.8	42767.2	946.96	40218	64456.5	845.5	70279.5	80679.4	522.43	192754	262143	2980.61	66509.2	68085	954.97	75940.5	107459	977.22	52767	53261.2	501.07
275	50121.8	56186.6	645.25	73825.5	59009.7	852.62	77541.8	120805	2355.83	48621	61748.2	472.59	61925.2	74334.6	556.25	194866	115914	2143.12	37251.8	41646.7	225.17	117203	117606	1151.66	177502	262143	2926.32	44169	33156.1	478.82	94011.8	129059	422.75	52745.2	38570.8	1032.4
276	39890.2	20913.2	296.37	68608.5	48908.2	509.97	97507.5	148076	260.77	41044.5	48903.7	553.58	69243.8	90945.5	554.47	58954.5	45497.7	1012.82	41566.5	47596.3	1035.96	48114	44562.3	520.65	112334	132475	1716.81	78882	46733	464.58	139706	236310	1824.5	104588	153614	1015.49
277	52033.5	68052.1	478.82	51501	35994.3	702.21	87723.8	116837	1171.24	44226	69550.8	1067.11	55535.2	63685.7	364.9	82968.8	70941.9	3780.72	40686.8	35825.2	370.24	73513.5	55531.6	1102.71	150468	150131	2338.03	60867.8	74370.2	507.3	124561	236195	999.47	50702.2	44788.4	841.05
278	86417.2	92753.1	1165.9	39515.2	25012.6	723.57	58701	58887.7	406.73	65013	119196	671.95	52290.8	52407.6	175.33	94100.2	61381.5	491.28	34756.5	32812.5	61.41	72477.8	40929.3	1510.33	45669	57598.1	218.05	225157	213003	3956.05	175184	262143	2340.7	35563.5	26676	503.74
279	38550	38790.6	262.55	44151	25718.3	291.03	71313.8	115538	807.23	58836.8	74331	1051.09	82788.8	131678	693.31	54547.5	57462.8	883.77	54707.2	70550.3	174.44	60171.8	65304.6	789.43	127474	138000	1967.79	109287	46774.8	1495.2	133556	164595	3641.88	96810	75687.4	721.79
280	86109	100622	1440.02	46814.2	33077.7	995.02	57222	72358.8	428.98	63030	74623.8	909.58	66807	74815.2	349.77	86289	71491	859.74	36549	27184.2	353.33	118404	84244.7	1606.45	95717.2	124307	1214.85	172553	165398	3168.4	57153.8	64978.9	575.83	109095	98333.4	1608.23
281	33565.5	35585.8	307.94	84221.2	64473.4	1669.64	84572.2	126070	352.44	37887	47357.8	789.43	72813	102724	482.38	44276.2	35715.7	482.38	37489.5	46531.9	115.7	55511.2	49315.8	595.41	160994	217626	1825.39	94259.2	66823	2208.98	61062	31825.5	176.22	76956.8	51750.8	777.86
282	40629.8	42684.4	488.61	44581.5	36027.2	852.62	62511.8	98990.2	646.14	52178.2	61391.3	248.31	54706.5	70520.9	1265.58	90360	80157.9	1854.76	42172.5	61674.3	271.45	105110	126085	1189.93	129437	165887	1751.52	73410	60528	1583.31	226412	262143	1509.44	262143	256731	8311.71
283	60271.5	95305.6	1573.52	74765.2	56053.1	806.34	84743.2	106735	3284.1	69183.8	103940	1482.74	78054.8	116167	597.19	48517.5	37250.9	632.79	44523.8	52678.2	1227.31	74685	61007.7	2011.4	169570	243385	2136.89	61731	52371.2	1196.16	133315	186674	3064.27	88085.2	97868	639.02
284	45462	61038.9	1299.4	58828.5	39490.2	511.75	59704.5	59088	924.71	36327.8	31074.3	336.42	63697.5	95471.2	800.11	66221.2	46841.6	1809.37	69492	97439	3019.77	82493.2	62795.7	1957.11	96948	212495	3663.24	56780.2	50077.6	639.02	145535	202493	7040.79	79858.5	58090.3	3865.27
285	48515.2	53650.1	651.48	63251.2	52898.9	940.73	67212	77303.6	395.16	39949.5	37623	1452.48	109855	165366	2770.57	38808	17274.9	302.6	44937.8	81282.8	2094.17	156482	176944	16284.3	136534	262143	1644.72	130821	173809	1440.02	95064.8	179902	1028.84	54249.8	55518.2	1109.83
286	178422	261551	4453.56	51324.8	38776.4	410.29	66747.8	88724.1	984.34	47031	26894.9	542.01	122972	186254	2443.05	65215.5	52808.1	289.25	41226.8	45220	379.14	76353	63448.1	2196.52	149812	193119	2863.13	117814	150323	3305.46	100394	63166.9	1117.84	142142	135070	3058.04
287	40836.8	37457.4	620.33	86412.8	75888.5	231.4	83787	137493	1261.13	36246.8	31249.7	187.79	63755.2	58913.6	380.03	100594	79100.5	1733.72	53261.2	59205.5	1980.25	68800.5	45788.7	650.59	73081.5	143411	1626.92	96719.2	53890.4	1695.45	73902.8	132629	2986.84	40017.8	33996.2	849.95
288	34071.8	36808.6	160.2	90594.8	86934.3	2356.72	59805.8	81969	426.31	59865.8	62304.4	1143.65	239687	262143	20425.5	158523	197753	2920.09	35403	32679	761.84	84432.8	64252.7	877.54	113296	100920	680.85	93845.2	65641.1	1206.84	156404	169034	1469.39	49957.5	87802.9	412.07
289	44514.8	48620.7	625.67	70005.8	68800.6	749.38	91797.8	138415	775.19	38238	37774.3	93.45	91883.2	110541	2111.08	59489.2	55311.7	764.51	32817.8	24988.5	210.93	62926.5	61941.3	555.36	120685	222591	2820.41	90997.5	110871	1096.48	125455	140747	1177.47	96012.8	77167.4	2907.63
290	37194	30054.4	525.99	39408	26340.4	158.42	54683.2	50974.8	116.59	36670.5	29710	440.55	68883	113513	971.88	53550.8	39478.6	869.53	36268.5	30552.8	231.4	116039	108511	3827.89	101235	137352	1763.98	74441.2	86668.2	1189.04	208323	262143	2753.66	61689.8	54738.6	357.78
291	46173.8	51665.4	445.89	123910	110388	2944.12	126340	184164	4180.33	37788	26337.8	80.99	64212.8	78677.8	397.83	60911.2	48246	504.63	109240	116018	2071.03	42996.8	30158.5	1174.8	55125	76161.8	1952.66	72397.5	60107	931.83	79857.8	101646	921.15	72499.5	56007.7	2144.01
292	42303.8	41787.3	521.54	71497.5	55317.9	306.16	81687.8	112758	821.47	48614.2	62929.2	568.71	74852.2	96402.1	531.33	71943	48854.8	782.31	36591.8	28821.8	378.25	96558.8	105799	1621.58	116722	155706	887.33	43224.8	35469.2	382.7	137852	197668	3304.57	98358.8	72508.3	1990.04
293	33865.5	36958.1	403.17	52187.2	43964.2	598.97	107743	172915	597.19	46110.8	72805.6	606.98	73639.5	102459	540.23	51969	39865.8	927.38	40119.8	48354.6	317.73	245431	206500	14164.3	94383.8	138139	930.94	128311	109455	7706.51	125774	171715	2581	49323	37577.6	263.44
294	124498	167352	2277.51	92458.5	72694.3	1019.94	59205	51513.2	325.74	38229	41991.1	686.19	147279	226699	6522.81	155798	149882	3302.79	44727	57376.5	464.58	79224	128609	2851.56	69826.5	106347	736.03	127635	162683	6314.55	123955	208235	1638.49	46459.5	23511.1	701.32
295	50155.5	67599.1	590.96	58381.5	62718.3	1226.42	59329.5	84040	1310.08	78582	97200.5	1436.46	59525.2	83947.5	869.53	47661.8	39095	954.08	37908	31560.3	1091.14	207814	198458	4252.42	62127.8	83986.6	2046.11	61601.2	48001.3	1446.25	171712	181702	2422.58	165112	165014	1113.39
296	35741.2	39666.4	186.9	79459.5	64869.4	923.82	95952	129015	2184.06	63037.5	92865.3	212.71	100161	140227	453.9	75588.8	61920	642.58	39169.5	49446.6	227.84	68031.8	53452.5	708.44	53304.8	69590.9	1274.48	38070.8	25291.1	314.17	113606	192625	1766.65	39330.8	28497.8	344.43
297	35750.2	38558.4	217.16	76960.5	53853	730.69	53691	58821.9	482.38	50349.8	60659.7	933.61	80654.2	94072.1	525.99	47355.8	36651.1	714.67	174706	262143	3152.38	68892.8	54053.3	249.2	51266.2	47336.4	436.99	151061	175085	1083.13	76622.2	109210	1117.84	94768.5	103361	1374.16
298	36577.5	32169.9	472.59	66580.5	39977.9	530.44	56142	53658.1	562.48	41346	40553.7	1546.82	67311.8	82169.2	1272.7	53000.2	41779.3	1387.51	130737	138011	5979.91	59679.8	58303	992.35	139906	193711	4181.22	62890.5	50207.6	1312.75	110708	170640	320.4	117503	95829	3464.77
299	55481.2	94323.1	935.39	132885	103327	1488.97	83406.8	136700	1511.22	64977.8	77769.1	558.03	67794.8	96459.1	1106.27	56340.8	43164.1	416.52	61123.5	73771.2	1328.77	78333	66831	1925.07	93409.5	124832	1471.17	88333.5	92622.3	898.9	84316.5	121440	202.92	123038	167445	988.79
300	43116.8	50945.4	502.85	70271.2	37939.8	1363.48	123501	178384	1503.21	49732.5	67509.2	1522.79	60441.8	89222.5	555.36	58484.2	48432	552.69	52455.8	56212.4	669.28	32888.2	35883	372.91	99520.5	113810	1195.27	117860	108996	7896.97	101146	125692	340.87	65577	40787.8	1354.58
301	51998.2	62653.3	102.35	44166	31158.9	495.73	61872	72503.9	493.06	58510.5	85241.5	809.01	111018	150252	213.6	49764	41135.8	982.56	167637	262143	11752.5	77796	74597.1	5680.87	78603.8	121125	833.93	129184	99006.3	1545.04	125012	262143	20088.2	207662	204347	2506.24
302	36603	38981.1	600.75	40528.5	18258.3	44.5	54504.8	46322.7	931.83	44235	50008.2	429.87	106966	154390	3341.06	49406.2	37127.2	512.64	33532.5	48231.8	487.72	63885	51099.3	2315.78	101670	170714	4659.15	58943.2	39688.7	536.67	166176	262143	2815.07	103759	96117.3	2550.74
303	173508	175767	3194.21	38058	26274.6	126.38	99321.8	157203	1124.96	53781	66898.6	380.92	85161.8	121579	641.69	94230	67930.1	964.76	98757.8	136294	3150.6	85932	50673.9	1320.76	130828	251416	674.62	187668	211976	1736.39	56003.2	69144.1	469.03	74558.2	147830	7828.44
304	54211.5	65912.5	776.08	45477	38460.5	501.96	96892.5	119870	645.25	49338	57776.1	1571.74	107431	134836	2131.55	94460.2	83325.4	1692.78	45234	53618.9	418.3	152327	103721	7630.86	73269.8	194253	1861.88	64478.2	56790.9	741.37	97339.5	83263.1	4681.4	81020.2	92500.4	825.03
305	39589.5	41114.4	600.75	41930.2	26583.4	358.67	97407.8	139175	330.19	53768.2	75747.9	2368.29	81798.8	130106	1308.3	49934.2	45494.1	574.94	39402	42294.6	627.45	80747.2	69808.9	2084.38	70457.2	99680	685.3	46298.2	43000.3	411.18	143137	179839	2654.87	109334	105770	585.62
306	36717.8	31372.5	589.18	57463.5	56875.4	561.59	63865.5	65037.6	292.81	37557	33734.6	337.31	117691	189728	1778.22	66269.2	47630.1	1209.51	39502.5	55433.6	994.13	95874	69820.5	865.97	65508	73169.6	699.54	137104	92499.5	2377.19	216803	262143	4181.22	73178.2	90779.1	1604.67
307	50669.2	52419.2	704.88	79306.5	64832.9	686.19	52323	66167	523.32	72357	68830.8	680.85	69240	104110	591.85	94527.8	71226.7	1146.32	61399.5	65814.6	1202.39	75802.5	94412.1	635.46	60509.2	65294.8	460.13	50014.5	40558.2	1275.37	88909.5	98002.4	1850.31	58596	44086.1	2528.49
308	46298.2	51443.8	453.01	78730.5	55856.4	882.88	177585	262143	3851.92	56951.2	54330.9	558.92	61602.8	97405.2	869.53	48675.8	25478	480.6	86070.8	115887	2879.15	71536.5	65978.4	2642.41	61152	64582	459.24	84262.5	79949.6	2787.48	150878	197861	2726.96	51210.8	53714.2	977.22
309	34168.5	39902.3	310.61	44433.8	39403	671.06	77410.5	112433	620.33	40005.8	49717.2	339.09	66296.2	65221	3069.61	87630	84454.8	353.33	36240.8	30737	706.66	45785.2	29843.5	171.77	105568	184619	2796.38	160594	106230	1885.02	66144	74914.9	888.22	100420	138242	1442.69
310	43137.8	48469.4	478.82	63080.2	46480.2	550.02	52995.8	69316.8	356.89	41555.2	47494.8	351.55	91308	157164	847.28	46479.8	25270.7	223.39	53808.8	56784.7	559.81	56076	45020.6	492.17	158194	219261	1270.03	107983	126948	3187.98	88881.8	138341	1372.38	85783.5	105214	404.06
311	38826.8	33409.7	780.53	86021.2	59840.9	1079.57	90336.8	126508	739.59	50946	51723.2	114.81	86132.2	155125	910.47	143557	110487	3056.26	47578.5	60288.6	724.46	101828	94987	1078.68	122755	164122	3307.24	60019.5	50495.9	533.11	60342.8	71348.6	2229.45	47541	47901.6	628.34
312	34265.2	36907.4	220.72	78117	71548	1003.03	66275.2	94913.2	425.42	41784	40395.3	811.68	63764.2	97907.1	409.4	51362.2	46019.2	456.57	35992.5	47680.9	794.77	136386	120462	7118.22	75399.8	97110.6	602.53	190570	170990	3355.3	64641	67181.6	453.01	71335.5	106586	3248.5
313	123136	168411	3810.09	47963.2	31157.1	264.33	180854	262143	1825.39	50865	56225.8	1114.28	95298.8	146345	1038.63	63123.8	36337.8	1232.65	97672.5	153183	2241.02	50421	40600.9	2265.94	81840	106957	582.95	123860	120030	395.16	43558.5	54211.7	235.85	89624.2	92153.3	1807.59
314	57803.2	70225.4	1257.57	50360.2	40418.5	475.26	57566.2	56823.8	250.98	35952.8	41261.3	279.46	94703.2	144943	796.55	97951.5	75648.2	905.13	96012	178933	3652.56	42600	36774.8	824.14	66802.5	92377.5	810.79	97135.5	102526	930.05	55530.8	62882.9	369.35	66981	65559.2	719.12
315	36701.2	43447.1	392.49	114583	104810	1354.58	69764.2	97462.1	644.36	74272.5	80567.2	679.07	76263	138872	718.23	60916.5	43581.5	307.05	36120.8	66004.2	942.51	60009.8	53083.2	666.61	166364	262143	6898.39	124309	70853.8	1792.46	52830.8	36568.3	349.77	102388	85569.9	1451.59
316	64663.5	69635.4	785.87	57678	42486.8	939.84	71073	93822	1103.6	39312	32337.3	496.62	119428	169153	452.12	70481.2	55175.6	331.08	76869	91425.2	1093.81	66788.2	71294.3	829.48	53463.8	50503.1	809.01	101804	152747	1545.04	61864.5	37261.6	310.61	54832.5	50902.7	552.69
317	59202.8	60295.7	2057.68	59829.8	43064.4	930.05	115435	158151	1112.5	65426.2	90502.3	468.14	62877.8	69867.7	290.14	40164.8	25456.7	217.16	41849.2	47937.2	780.53	109268	99733.4	1529.91	92874	112760	470.81	71976	63631.4	307.94	69186	85784.4	885.55	74069.2	80816.4	2347.82
318	43250.2	40730	853.51	77189.2	66345.9	943.4	61838.2	87313.4	1024.39	37185	40377.5	841.05	74641.5	151047	888.22	66583.5	52548.3	1219.3	31497	44379.8	742.26	125364	112566	5212.73	95067	137748	2292.64	130885	115035	539.34	71253	98276.5	1249.56	70815.8	63826.3	1324.32
319	38426.2	49802.6	77.43	82281.8	95043.1	907.8	93975.8	167393	1183.7	44181	60908	640.8	65770.5	62867.8	525.1	46333.5	38388.4	906.91	52272	68365.4	181.56	34133.2	28643.8	1268.25	106643	182124	1820.05	73823.2	87486.1	729.8	49029	64089.8	955.86	207745	207763	3494.14
320	37536.8	40513.7	743.15	49318.5	42841.9	528.66	58876.5	66063.8	824.14	36817.5	37064.9	356	59049.8	63053.8	60.52	80786.2	66431.4	1127.63	38069.2	45035.8	456.57	109603	91070.1	1218.41	159565	192411	2599.69	44665.5	37092.5	1354.58	121054	220925	2673.56	95738.2	91630.8	858.85
321	43778.2	33618.9	116.59	68911.5	60913.4	1030.62	76641.8	120855	604.31	37116	48389.3	447.67	64243.5	73832.6	396.05	68176.5	64968.2	903.35	60910.5	76322.8	554.47	65367	64881.9	1042.19	69435	108786	279.46	49800	45114.1	338.2	100164	112567	757.39	94528.5	99189.6	1727.49
322	37023	42337.3	359.56	46938	20009.9	336.42	106545	170653	961.2	48090.8	64630	505.52	110002	167794	1051.09	100553	82541.3	1346.57	59275.5	68019.1	3233.37	72918	53307.4	2570.32	51336	51132.3	537.56	98975.2	77258.2	1436.46	100809	162996	2102.18	41448.8	29414.5	527.77
323	42103.5	47890.9	562.48	45870	29321.9	760.95	89099.2	115984	1243.33	58974.8	78215.9	1127.63	61135.5	83774.8	505.52	70269	59870.3	1352.8	111878	154655	621.22	53091.8	43261.1	2611.26	82861.5	119212	1167.68	51698.2	44395	552.69	65339.2	68183.8	625.67	63357.8	67198.6	520.65
324	54025.5	64646	314.17	78409.5	54670	802.78	68490.8	95198	1027.06	40731.8	37908.7	478.82	132892	191302	614.99	130118	114905	1333.22	45390.8	45425.6	673.73	70233.8	46325.4	1225.53	38470.5	52518.9	635.46	39540	55897.3	879.32	138513	199989	1857.43	86285.2	120747	817.91
325	43284	49634.4	453.9	93103.5	79354.2	1032.4	50494.5	36607.5	921.15	28956	27024	344.43	64584	79626.5	1650.95	105801	98002.4	1390.18	96541.5	130679	4442.88	112851	89348	3441.63	51017.2	70723.9	1241.55	96469.5	94229.6	2305.99	95644.5	137849	930.94	244799	155762	5806.36
326	132332	124175	2644.19	43149	21975.9	549.13	155945	241637	1869.89	35925	29621.9	430.76	60396	68350.2	522.43	40500	26824.6	566.04	41583.8	43406.2	744.93	39474	36112.6	795.66	78324	97754.9	751.16	136322	124034	1498.76	103432	88678.7	816.13	167725	161153	3494.14
327	62841.8	96941.5	384.48	37290	24014	229.62	75374.2	106305	224.28	37223.2	41459.8	469.92	52011	71111.9	518.87	73794	52670.2	1480.07	128120	180885	4878.98	132046	128378	1948.21	84369.8	115175	5230.53	200846	214185	1458.71	49558.5	21185.6	166.43	83749.5	73083.2	374.69
328	47114.2	54198.3	525.1	48206.2	35737.1	418.3	98043.8	171985	706.66	49407.8	57990.6	210.04	67175.2	89882	1299.4	77018.2	44524	617.66	72276.8	103265	3797.63	49823.2	37723.5	713.78	81927	174355	1513	73475.2	98475.8	436.99	131850	202978	1439.13	89100.8	88822	1264.69
329	60633.8	67494.9	772.52	83400.8	53524.6	2178.72	87966	135601	1497.87	62743.5	86871.1	247.42	87148.5	128397	587.4	44405.2	34865.8	420.97	37692	41241.7	397.83	67447.5	63912.7	402.28	181622	262143	2151.13	143636	180417	3055.37	160226	207497	4380.58	133486	90794.2	4107.35
330	42620.2	48343	583.84	42805.5	30653.4	638.13	94563.8	131054	199.36	46719	45527.9	531.33	53486.2	58270.1	182.45	76820.2	62968.4	933.61	65033.2	99898.9	1619.8	57183.8	43957.1	413.85	80494.5	131254	1663.41	84751.5	118168	1974.91	189104	223515	2069.25	111631	57794.8	781.42
331	54665.2	79218	721.79	109516	75633.1	1662.52	61107.8	66078	294.59	49761.8	66599.6	598.08	89939.2	114812	772.52	197447	145729	2927.21	94635.8	106979	234.07	73752	51029.9	1969.57	104649	162889	3107.88	44374.5	38881.4	344.43	140162	136982	1847.64	185894	179694	1899.26
332	35835.8	43981.1	758.28	92507.2	91320.2	1196.16	103430	145493	1398.19	36498	46675.2	404.06	85902	121626	1310.08	65202	35836.7	842.83	44412.8	46253.3	590.96	40023	25330.3	697.76	210850	262143	4822.02	71751.8	87973.8	2190.29	101290	147495	1324.32	67680.8	58877.9	228.73
333	38311.5	27591.8	396.05	65449.5	48953.6	647.03	55457.2	67444.2	422.75	48162	66003.3	1039.52	117382	182867	1193.49	81732.8	78396.5	1425.78	98105.2	124954	4668.05	197922	139386	2104.85	72693.8	104103	817.91	141704	146875	2066.58	79739.2	52511.8	341.76	134816	64594.4	3095.42
334	43037.2	49603.3	469.92	102373	85439.1	581.17	89581.5	129555	2810.62	46248	64235.8	906.02	78364.5	114940	762.73	60942.8	42453.9	663.05	45634.5	63077.9	408.51	46583.2	44092.4	342.65	59326.5	99038.3	169.1	82653	74042.7	3717.53	66518.2	85044.8	430.76	97252.5	78610.1	1001.25
335	40199.2	54695.8	867.75	46491.8	36348.5	378.25	52700.2	72770	558.03	163659	215200	1675.87	121645	217482	2221.44	53382	53442.7	574.05	33080.2	30183.5	803.67	70198.5	63984.8	1304.74	67287.8	119339	966.54	64241.2	89066.8	1037.74	86905.5	105174	915.81	71704.5	36086.8	538.45
336	39189	28325.1	45.39	126476	93076.2	2138.67	95016	186348	1803.14	63191.2	85936.6	1796.02	127572	239167	2203.64	199378	153795	3682.82	49377	74338.1	1206.84	151382	135163	2311.33	114236	163649	1517.45	86327.2	63394.7	517.98	104563	230822	1713.25	87435	80907.2	1336.78
337	38118.8	46371.7	142.4	48301.5	41591.5	744.04	67362.8	101659	553.58	34437.8	35921.3	325.74	50999.2	52245.7	803.67	62658.8	43411.5	578.5	49531.5	57840.2	522.43	68471.2	50592.1	947.85	88164	120822	1098.26	131236	93527.4	2410.12	92158.5	122234	424.53	121772	91139.6	4796.21
338	190370	260112	4164.31	85170.8	80437.3	1804.03	89614.5	138193	258.99	42424.5	46030.8	550.02	54235.5	43531.7	239.41	41188.5	26027.2	68.53	156189	202589	6767.56	59562.8	38490.7	279.46	61056	82914.2	1878.79	146068	175651	4558.58	125240	192075	1877.01	57743.2	50463	209.15
339	47586	52211.8	436.1	170355	125727	2093.28	129656	144791	3770.93	34120.5	26934.1	87.22	54075.8	81542.7	1122.29	54532.5	36930.6	1199.72	36050.2	30455.8	787.65	146612	180955	2886.27	49970.2	44846.2	445.89	104730	73873.6	1920.62	64499.2	107723	662.16	71901	61305	1447.14
340	67069.5	60705.1	196.69	53052	40455.8	485.05	70644.8	86132.4	339.09	33163.5	40003.7	364.9	52031.2	63675.1	451.23	39051.8	29784.7	269.67	45551.2	52690.7	2356.72	108806	94154	897.12	81285.8	91081.7	524.21	87610.5	89235.9	1691.89	85385.2	117104	951.41	148410	144590	2684.24
341	96882	151050	1890.36	81966.8	81208.9	1126.74	110379	138307	579.39	40292.2	35538.6	503.74	74397	94920.3	667.5	58306.5	49395.9	758.28	64546.5	48973.1	857.07	66437.2	59711	2577.44	96712.5	79748.4	1685.66	80432.2	79852.6	1063.55	70318.5	100718	501.96	112878	88440.2	673.73
342	65333.2	86079	748.49	57198	40712.2	666.61	62003.2	84408.5	1461.38	61618.5	55949.8	2422.58	98292	149061	1561.06	38124	27641.6	879.32	45604.5	25373	350.66	60114	60247.7	332.86	58618.5	62324.9	417.41	51082.5	53883.3	661.27	70009.5	112921	487.72	76773.8	72387.3	847.28
343	69709.5	81497.3	1525.46	59592.8	43885	492.17	130278	183304	1336.78	40718.2	31259.5	183.34	65916	86426.1	500.18	51144.8	40139	1423.11	133000	208156	6187.28	105181	69356.8	3014.43	123049	175297	12015	93929.2	87754.9	977.22	55745.2	67197.7	571.38	109289	103568	3136.36
344	56573.2	58569.1	317.73	101066	69147.7	1003.92	70966.5	94845.5	757.39	59448.8	62308.9	636.35	93574.5	79386.2	666.61	51580.5	38107.1	719.12	73650	89484.2	1158.78	81447.8	59355.9	1259.35	61770.8	82161.2	598.97	142404	80294.9	2409.23	55939.5	42820.6	184.23	82899.8	134821	2790.15
345	51675	71653.9	125.49	45825	23164	489.5	56964.8	81426.1	643.47	55756.5	86040.8	474.37	100636	146509	1677.65	144868	130144	3492.36	38880	32823.2	126.38	106915	90587.8	1054.65	84180	158099	219.83	58777.5	49962.8	558.92	249703	262143	4415.29	63126	46470.5	1218.41
346	35860.5	20157.6	413.85	61236.8	42008.9	698.65	68133	86398.5	570.49	45078	48772.9	239.41	85242	155042	934.5	39591	23437.3	703.99	57861.8	79685.3	1699.01	209206	219651	8521.75	168896	262143	922.93	59514	62119.3	460.13	209062	242291	4459.79	145200	134718	2223.22
347	47223	59023	654.15	57663	45997	967.43	59310	82521.7	659.49	32491.5	21877.1	43.61	71967	103682	477.04	70354.5	65594.8	1712.36	57687.8	46976	585.62	42516	29088.8	394.27	37893.8	55575.2	414.74	48586.5	25512.7	1414.21	67599.8	86636.2	721.79	95107.5	99707.6	1470.28
348	46026.8	57764.6	2385.2	40712.2	26179.3	350.66	51993	54858.7	655.93	50638.5	74587.3	639.02	96750	130116	586.51	52204.5	21277.2	247.42	62565.8	82662.3	1691	66996.8	44408.3	279.46	156376	226448	11597.6	56280	56470.5	613.21	145066	134225	1246	140652	103348	1365.26
349	126296	158715	2964.59	57047.2	41045	280.35	53667	54518.7	437.88	51801.8	78397.4	331.97	58040.2	73635	1051.98	67035	75957	1640.27	58766.2	95789.8	699.54	102046	75836	1820.05	65272.5	94184.2	1979.36	135508	142846	4804.22	51660.8	55610.8	457.46	90841.5	76170.6	3223.58
350	53955.8	68489.1	677.29	43232.2	32678.1	1098.26	73782.8	89269.7	1246.89	57238.5	67583.9	97.9	83982.8	127866	615.88	120603	106310	2059.46	41135.2	68238.1	639.91	83100	62648	718.23	63164.2	111432	488.61	102818	81083.4	2449.28	76974	126591	2075.48	68738.2	63957.2	132.61
351	39672	47349.8	78.32	72697.5	52270.6	631.9	73663.5	114593	777.86	90227.2	218192	3894.64	49715.2	39988.6	388.04	107083	110840	2103.96	52196.2	76915.6	1567.29	104192	91176.9	4087.77	102952	152794	436.1	155599	170355	2228.56	107674	148027	1222.86	84510	88089.5	4953.74
352	57633	78929.6	995.91	41672.2	31672.4	635.46	93727.5	134905	1242.44	56123.2	77242.2	844.61	60441.8	58404.5	1017.27	84690	99348.9	1244.22	37345.5	34183.1	234.07	143481	96255.3	1715.03	81491.2	80887.6	1076.01	122150	86093.3	2770.57	86865.8	110324	1529.02	106063	92954.3	1046.64
353	84003.8	102643	955.86	84427.5	64406.6	971.88	79886.2	105480	787.65	48177	54637.1	676.4	138398	185298	789.43	48924.8	35077.6	987.9	61818.8	110955	2035.43	108435	123339	2656.65	96781.5	140559	4917.25	141277	143458	1865.44	97899.8	117997	852.62	49331.2	46359.2	280.35
354	81325.5	82554.6	661.27	54832.5	40689.9	1035.96	52479.8	66281	831.26	35847	39690.4	459.24	59709	57362.3	412.96	171146	132786	1930.41	65675.2	50408.7	1038.63	99315	108531	1352.8	43377.8	46593.3	366.68	106017	102880	964.76	81259.5	83987.5	683.52	131867	103396	859.74
355	65016	86006	950.52	44968.5	24532	801	92777.2	186092	2022.97	72723.8	63522.9	237.63	162321	186702	2366.51	89555.2	80903.7	897.12	32391	40710.4	534.89	96648	72041.9	1161.45	218800	262143	5289.27	66857.2	50678.4	573.16	70692	89432.5	1011.04	173371	239637	5174.46
356	52276.5	65196.9	2759.89	60686.2	44095.1	483.27	178718	262143	2240.13	53643	74679	1262.91	174830	262143	1708.8	46714.5	31409	396.94	171262	144226	3133.69	125290	114042	3810.98	262143	262143	10215.4	43765.5	40742.4	1019.94	103911	140260	1074.23	83568	93544.3	608.76
357	46251.8	66869.3	1441.8	236632	147054	2907.63	89886.8	164037	1510.33	36285.8	46575.5	399.61	198105	262143	1988.26	56421	47109.5	626.56	51588.8	79436.9	712.89	102330	82462.1	1276.26	83172	100291	386.26	92454	102277	827.7	98346.8	136197	1138.31	93139.5	96996.6	560.7
358	81025.5	92463	421.86	65642.2	54433.3	1437.35	146571	216252	1990.93	48628.5	58206.9	146.85	135679	173821	2460.85	69651	60704.2	769.85	57463.5	75006.5	864.19	121402	87017.1	2549.85	58726.5	49980.6	672.84	70622.2	66770.5	1767.54	186766	245967	3183.53	64677.8	60149.8	902.46
359	47170.5	61150.1	501.96	45459.8	29941.4	300.82	78107.2	113575	1306.52	36306.8	40425.6	616.77	119378	158758	2033.65	132842	95025.3	1552.16	64218	91095.9	1602.89	45753	32086.3	-8.9	93469.5	92507.5	368.46	69537	55131.9	919.37	110375	168156	533.11	128407	182980	4152.74
360	36129	45603.6	297.26	64095	37160.2	665.72	81006	106347	540.23	45557.2	53496.1	568.71	88091.2	134058	903.35	62445	56717.9	938.06	54556.5	55293.9	980.78	117194	62477.1	1587.76	50226.8	45192.4	93.45	49565.2	34182.2	503.74	89184.8	129340	4267.55	78696.8	63347.5	1474.73
361	43999.5	50966.7	452.12	76125.8	57956.8	1006.59	115100	153564	2326.46	40673.2	42186.9	543.79	49055.2	39005.1	181.56	46849.5	36399.2	566.04	128696	146006	1497.87	77661	108376	1158.78	150280	153180	5690.66	57075	43264.7	711.11	99260.2	116900	959.42	44770.5	37892.6	303.49
362	61545.8	64469.8	876.65	58421.2	47479.7	953.19	57185.2	73684.9	334.64	45129	37106.8	544.68	107047	158003	357.78	57817.5	55306.4	315.06	70730.2	55527.1	1281.6	51838.5	41341.4	603.42	250688	262143	18399	43781.2	28812	49.84	63258.8	89510.9	480.6	110936	100265	3997.88
363	59000.2	68886	603.42	44529	29410	574.05	110952	131292	1968.68	39194.2	27631.8	448.56	116176	154135	1278.93	229382	238067	17480.5	85488	117359	2809.73	59515.5	41299.6	894.45	45011.2	50866.2	267.89	151072	120631	1506.77	158504	222014	1191.71	72591	60208.5	401.39
364	41817.8	46154.5	407.62	39264	20746.8	138.84	102883	122120	2226.78	58533.8	80648.2	789.43	61392.8	54591.7	428.09	66362.2	68260.3	898.01	39241.5	37638.1	616.77	87410.2	111015	3885.74	59623.5	58927.8	539.34	92379.8	74939.8	3076.73	68414.2	77886.6	4435.76	39019.5	40310.8	571.38
365	33325.5	39039	289.25	58945.5	60615.2	283.91	79620	105534	717.34	92192.2	126392	1559.28	140386	185375	1746.18	49839.8	33929.5	745.82	48348	52940.8	560.7	50912.2	56663.6	286.58	118283	115726	2747.43	119345	116568	1512.11	103846	100432	666.61	50171.2	58272.8	552.69
366	68430	85377.7	1693.67	67160.2	49218.8	917.59	185126	262143	5390.73	43443.8	47822.4	474.37	81091.5	155861	989.68	65675.2	51923.5	1661.63	42089.2	49120.9	644.36	113520	120046	3087.41	100237	136185	926.49	115476	92166.6	2635.29	52842	56649.4	767.18	80413.5	78265.7	1187.26
367	32544.8	37001.8	703.99	75125.2	54303.3	834.82	81191.2	133553	1987.37	37503	30342.8	57.85	68626.5	77619.6	558.03	262143	240678	3214.68	53017.5	50093.6	1010.15	108105	96572.1	2374.52	64446.8	73669.8	1093.81	177742	152929	1786.23	128487	209819	2709.16	262143	262143	8091.88
368	34555.5	27411.1	312.39	51175.5	40661.4	172.66	61944.8	82306.3	1189.93	42048	52518.9	406.73	70386.8	97831.5	546.46	147272	121028	1563.73	36339	46886.1	566.93	104764	101476	2215.21	262143	262143	5225.19	85512.8	98725.9	1327.88	91838.2	116146	205.59	135195	101027	307.94
369	49623.8	54120	476.15	88402.5	90867.2	1333.22	120864	225934	520.65	81085.5	110904	2998.41	82506.8	126917	628.34	90631.5	91708.3	881.1	66773.2	75701.6	388.93	107092	108287	1707.02	55026.8	51359.2	100.57	65522.2	59661.1	2213.43	102956	133819	1246.89	90755.2	98607.5	1467.61
370	5410.5	29677	124.6	66518.2	47398.7	593.63	72265.5	126686	2613.04	41036.2	29560.5	455.68	102707	136257	1136.53	134741	120906	3129.24	30049.5	31185.6	708.44	63612	52946.1	837.49	78392.2	149483	6774.68	108595	89120.1	489.5	48462.8	61881.7	325.74	62367.8	40675.7	753.83
371	35287.5	33792.4	437.88	73098.8	57320.4	781.42	60644.2	73410.8	321.29	126808	262143	7576.57	122354	181426	1256.68	36351.8	26975	582.95	37050.8	45708.6	1373.27	98211	73929.6	1148.99	178609	220652	3238.71	57382.5	50985.4	1540.59	107042	223267	4585.28	72446.2	58983.9	2995.74
372	38298.8	38888.6	591.85	38798.2	28777.3	517.09	58007.2	70577	609.65	58147.5	80462.2	1448.03	77277	96063	756.5	69706.5	58747.1	170.88	98743.5	110176	350.66	85659	96305.1	404.95	93439.5	168298	1050.2	91597.5	81961	2297.98	162918	255957	4401.94	125296	103983	6446.27
373	43645.5	51554.1	1092.03	55575	40410.4	1246.89	171821	262143	3785.17	80177.2	64701.2	518.87	221503	262143	2022.08	60464.2	40956	650.59	49020	52814.4	839.27	169371	178089	2765.23	82211.2	115250	831.26	71940	49160	676.4	72147	86247.2	598.08	120868	69112.9	1359.92
374	63408	71135.9	1142.76	70434	54242.8	1545.04	108524	129041	1234.43	53732.2	65772.8	663.94	78254.2	121072	873.09	78503.2	77868.8	995.91	104344	117933	1787.12	76896	73763.2	809.01	108370	113779	3562.67	80038.5	85563.7	1781.78	89833.5	133761	2073.7	49863	41263.1	177.11
375	81499.5	80442.6	1997.16	103466	74813.4	1545.93	140452	220716	1122.29	41307	44745.6	77.43	118490	196870	1346.57	105664	93895	1324.32	35746.5	44306	1368.82	40076.2	30868.8	762.73	56988	72698.8	1117.84	54213.8	41348.5	1381.28	64820.2	66119.9	944.29	131752	90893.9	1139.2
376	86716.5	125111	967.43	39846	30592.9	251.87	59660.2	80252.2	1029.73	36277.5	41422.4	456.57	102135	142586	162.87	39310.5	29708.2	873.98	60911.2	50769.2	551.8	86994	73319.1	239.41	97238.2	127790	1103.6	47042.2	35447.8	222.5	41399.2	20679.2	19.58	143108	167332	1856.54
377	36903	29454.5	838.38	99544.5	86575.6	922.04	83186.2	103527	649.7	69299.2	106576	886.44	69605.2	72517.2	392.49	48489.8	33941	1137.42	67443.8	83619.1	921.15	58938.8	71585.4	831.26	69764.2	105651	810.79	86540.2	98265.8	1520.12	83049	111562	1966.9	55890	42019.6	706.66
378	164554	235540	4404.61	166009	122685	1662.52	108131	167352	318.62	39617.2	43543.2	1090.25	56171.2	82135.4	445.89	69260.2	55567.1	1330.55	57445.5	78091.3	1486.3	114251	115153	3324.15	97940.2	134904	388.93	191958	149949	3155.94	48938.2	39823.9	202.92	107120	112088	2040.77
379	34173	23965.9	65.86	58791	50787.8	590.07	139831	247093	517.98	53418.8	78364.5	550.02	85821.8	118673	1281.6	47286	45518.2	202.92	63629.2	73010.3	1107.16	156372	140353	2357.61	81362.2	113206	3794.07	94275	57955	1804.92	77884.5	138866	589.18	179704	198908	27514.3
380	100552	109334	2326.46	129905	76954.7	543.79	173492	209066	3046.47	49202.2	51894.1	564.26	89532.8	119531	794.77	89341.5	80259.3	1194.38	60054	82021.5	1304.74	71370.8	76368.2	650.59	65599.5	98705.4	1235.32	53232	32735.1	258.99	77843.2	115178	4513.19	87300.8	98900.4	1235.32
381	36792	30616.9	135.28	96189.8	52955	2455.51	108128	153306	1963.34	38398.5	41903.9	355.11	73200.8	116544	2202.75	90945	112255	2467.97	34430.2	40710.4	203.81	125669	98265.8	435.21	182578	262143	9825.6	63840.8	40048.2	798.33	207420	262143	8129.26	74406	62361.4	189.57
382	35930.2	30389.9	480.6	91149.8	77101.6	2531.16	58764.8	85448	355.11	38987.2	36517.6	72.09	86762.2	130438	285.69	74827.5	62318.7	795.66	34720.5	43026.2	335.53	151642	117484	6297.64	70503	95680.3	2628.17	53844.8	42801	510.86	225438	262143	1809.37	165808	144950	4270.22
383	59977.5	82012.6	1426.67	42260.2	25540.3	803.67	60821.2	72251.1	1836.96	71670.8	101271	833.93	63669	78520.2	436.1	71283	59879.2	778.75	71193.8	73163.3	1234.43	119127	139030	846.39	71691	100930	212.71	66889.5	75971.3	2488.44	117061	197405	2907.63	40848.8	28089.3	100.57
384	35922	30933.7	56.96	39469.5	19444.7	245.64	55299.8	68700	455.68	40560	49826.6	863.3	102562	169873	396.05	95514	64045.3	1661.63	62394.8	87380.2	1838.74	66749.2	53909.1	1159.67	70435.5	90810.3	649.7	69687	52710.2	936.28	148603	151256	2778.58	48610.5	34695.8	130.83
385	81940.5	92489.7	1797.8	45433.5	33256.6	678.18	55950	55479.9	448.56	32354.2	37273.2	782.31	124703	187178	1665.19	48927	36246.1	605.2	65137.5	78616.4	1791.57	115876	101877	3445.19	109609	196604	3225.36	44574.8	40588.4	1563.73	104939	140170	1239.77	108549	84981.6	1206.84
386	34631.2	26558.5	247.42	45731.2	36174.1	153.97	75712.5	105281	445	56745	57723.6	1078.68	90563.2	138079	4361	40178.2	69339	192.24	56071.5	81570.3	1763.98	66669.8	58794.3	776.08	78220.5	106535	2410.12	84569.2	51114.5	606.98	81765	121216	1375.05	84673.5	64169	1551.27
387	33021.8	24232	189.57	44008.5	33237.9	864.19	86282.2	125780	704.88	34145.2	19212.4	315.06	109532	192001	1556.61	75444.8	59264.2	1001.25	52638	63142.8	475.26	41477.2	29421.6	186.01	41613.8	77707.7	2750.1	118418	124047	942.51	129122	186509	1651.84	69084	58944.7	1815.6
388	34494	29062.9	493.95	49206.8	33121.3	490.39	53796	67763.7	637.24	40144.5	45441.6	758.28	77237.2	109176	888.22	50374.5	41467.8	823.25	68700	89866	323.07	245000	226379	4079.76	61032	83460.6	635.46	64064.2	56597.8	1187.26	121276	179483	478.82	120566	104515	8068.74
389	35973.8	25023.2	300.82	56649.8	44421.7	687.08	54891	59927.3	362.23	42735	36558.5	840.16	124172	170569	932.72	58153.5	63222	1335.89	44610.8	47905.1	435.21	87758.2	80872.5	1554.83	89061.8	123606	790.32	68646	68868.2	4717.89	64113.8	156895	783.2	63828.8	71384.2	1005.7
390	33121.5	30548.4	678.18	48591	39977.9	622.11	81525.8	108208	1801.36	46853.2	57700.5	409.4	53521.5	67781.5	534.89	209720	232872	1618.91	51383.2	67757.5	973.66	49935	44747.4	1704.35	100051	125969	2073.7	39270.8	33877.8	252.76	110725	123670	482.38	39717	36251.5	579.39
391	32482.5	24974.3	402.28	92525.2	80460.4	1625.14	59765.2	63230.1	325.74	60123.8	75078.6	517.98	56008.5	69731.5	589.18	67401	44620.1	707.55	104601	167312	3369.54	52677.8	40455.8	1015.49	90771	114999	1276.26	82324.5	84454.8	2238.35	72825.8	97264.5	598.08	130108	124855	1453.37
392	48857.2	62110.4	691.53	65509.5	53288.8	740.48	90626.2	114297	751.16	39534	49979.7	341.76	58923.8	72955.1	812.57	114148	111555	2130.66	57414	66452.7	942.51	66868.5	47186	803.67	77868.8	97777.2	1340.34	222625	253313	11079.6	117452	176226	1873.45	119360	113464	3021.55
393	65124	81012.2	2840.88	139956	102373	1665.19	104615	161429	307.05	35098.5	39529.3	305.27	73162.5	87627.6	701.32	74415	68253.2	749.38	44840.2	44997.5	473.48	42632.2	40771.8	117.48	185842	262143	3315.25	105616	102006	1109.83	147248	147105	862.41	74898.8	95101.8	984.34
394	47406	70358.9	529.55	94270.5	73774.8	905.13	68925	89704	3649	60334.5	61809.6	744.93	68895	48069.8	6935.77	63561.8	43374.1	691.53	94188.8	104225	2884.49	49726.5	43413.3	184.23	64580.2	121788	1022.61	86050.5	61772.2	915.81	157185	186013	1656.29	62859	59533.9	454.79
395	42322.5	37204.7	323.07	46527	29164.4	1119.62	78319.5	107172	631.9	71922	129912	851.73	71403	138914	836.6	64005.8	42946.9	545.57	35152.5	55207.6	3143.48	141197	173471	5978.13	130882	189860	2659.32	211664	232917	1835.18	60501	58251.4	333.75	79177.5	76847	545.57
396	60390.8	87067.8	683.52	58551.8	47204.7	1027.06	62945.2	73527.4	915.81	57961.5	87057.1	958.53	158241	262143	1517.45	43524	32707.5	682.63	122539	138680	526.88	93438	71944.9	946.96	100825	80816.4	1971.35	58104	83312	2289.97	153071	191799	1768.43	75669	64428	1039.52
397	36579	38038.6	1287.83	67083	67565.2	1598.44	92457.8	85083.1	1100.04	43380	37704	324.85	61754.2	90035.1	1078.68	46253.2	35492.3	727.13	87965.2	119089	1286.94	64660.5	55435.4	2581	71712	88843.4	957.64	113954	151081	1252.23	133430	177104	1394.63	50317.5	43594	671.06
398	52080	61993.8	1869.89	65804.2	50891.1	699.54	62598.8	78535.4	563.37	40119.8	28635.8	722.68	54651.8	66352.2	287.47	86495.2	82674.8	2332.69	62397	79692.4	3465.66	87221.2	93178.5	2160.92	95418	87187.1	30021.5	99914.2	81785.7	1106.27	97159.5	158157	3815.43	51120	46540.8	494.84
399	64996.5	74274.1	1546.82	47353.5	34626.3	283.02	55839	82749.5	566.93	38745	43126.7	404.95	59247	75265.5	397.83	55398	53287	2114.64	77123.2	116204	247.42	46596.8	44782.1	4526.54	88445.2	76448.3	275.9	38299.5	30841.2	631.9	74928	98240	1134.75	42215.2	37606.1	467.25
400	56730.8	67149.6	1087.58	71673	61201.7	731.58	99745.5	128718	1164.12	36600	36728.5	747.6	51792	65515.6	387.15	76009.5	67706.8	1080.46	72552.8	99203	4873.64	54862.5	35482.5	593.63	50466	65174.7	196.69	90880.5	83893.2	336.42	93882.8	136957	1053.76	65085	55267.2	551.8
401	40755.8	39894.2	451.23	117907	94753.9	1475.62	81050.2	147874	529.55	70227.8	76000.7	875.76	72609.8	119966	704.88	70184.2	55982.8	893.56	76362	111254	2539.17	78831.8	63378.7	1071.56	195458	205108	2386.98	160114	220942	1178.36	73613.2	111845	797.44	74013.8	57584.8	1904.6
402	36815.2	36636.8	356	135239	105756	5022.27	61991.2	70666	113.92	40260	33887.6	583.84	66313.5	95787.1	681.74	71470.5	70329.6	2337.14	91962.8	99585.7	1973.13	65541.8	52025.8	1214.85	72674.2	83240.8	1449.81	68343	103992	557.14	111322	199502	1398.19	86218.5	88549.7	8709.54
403	37136.2	37289.2	1000.36	65494.5	48573.5	781.42	94795.5	119876	181.56	39585.8	31368	1243.33	101482	153343	1245.11	84969	54006.1	1378.61	75178.5	93047.7	807.23	67893	53144.6	804.56	63827.2	98942.2	492.17	70208.2	73679.5	2126.21	103500	188143	1396.41	52538.2	54409.3	516.2
404	37350	42548.2	375.58	46156.5	25868.7	394.27	65709.8	85729.2	868.64	38348.2	41393	87.22	89081.2	141449	346.21	78119.2	65792.4	835.71	37784.2	43627.8	336.42	46809	39323.8	169.1	103830	127943	974.55	105856	100068	8378.46	106772	153933	1401.75	118169	100291	1314.53
405	49620.8	61628.9	589.18	71804.2	58724.9	828.59	77337	110704	1064.44	47556	41604.8	861.52	63893.2	98198.1	420.08	61142.2	47696.9	114.81	40745.2	48507.7	551.8	45876	39380.7	486.83	180809	207949	11093	78018	81089.7	1598.44	76218.8	166288	432.54	91248.8	74366.6	2225
406	36816	30143.4	477.93	69260.2	77745.9	1002.14	55661.2	59674.5	353.33	55682.2	55626.8	594.52	111022	197052	3618.74	70068.8	47549.1	1255.79	49500	50980.1	984.34	87045.8	85326.1	1317.2	97810.5	149014	287.47	102428	103443	1097.37	91493.2	154152	1238.88	113089	96781.3	5616.79
407	38679	52520.7	362.23	51987	43723	731.58	79976.2	107095	777.86	41199	55018	2003.39	85184.2	132557	1035.07	50004.8	31716.9	1504.99	81812.2	114323	829.48	144239	108468	7727.87	92658.8	176207	392.49	230463	262143	13317.1	55218	30886.6	209.15	69021	66830.1	669.28
408	49329.8	49537.4	119.26	79749	82028.6	775.19	85434.8	136483	571.38	52369.5	44678	546.46	77011.5	141750	1021.72	56142.8	44830.2	1189.04	86658	70764.8	1994.49	72291	47974.6	2027.42	77817.8	102945	1740.84	78903	83833.5	951.41	93793.5	118455	942.51	198201	120721	1568.18
409	39822	41570.1	606.09	40662.8	23298.4	608.76	97024.5	136319	1056.43	54429.8	71221.4	577.61	73028.2	107295	556.25	202554	171927	2491.11	66284.2	80564.6	980.78	106102	102018	639.02	43396.5	52476.2	607.87	103136	133779	1273.59	56894.2	71951.2	1151.66	70243.5	66907.5	518.87
410	35741.2	26445.5	526.88	52400.2	54460	1109.83	93969.8	133957	806.34	37159.5	41049.5	129.05	176417	203410	1905.49	48636.8	44647.7	532.22	52696.5	62357.8	2846.22	39975.8	36029	963.87	59760.8	67090.9	161.98	49445.2	50945.4	56.07	102010	162704	2223.22	95508	165132	4027.25
411	44943	53030.6	575.83	43548.8	27181.5	481.49	109197	144669	2670	45755.2	62790.4	709.33	102674	122840	970.1	80439	82114.1	955.86	64833	67827.8	270.56	59880	64435.1	5306.18	47229.8	60657.1	214.49	77013.8	41862.9	792.99	133705	217368	4439.32	50192.2	50244.1	431.65
412	31909.5	23004.7	278.57	66130.5	45226.2	1138.31	66912	66667.2	677.29	54429	72562.6	473.48	45280.5	53524.6	344.43	103755	70669.6	1164.12	132048	199166	2963.7	49491.8	44888.9	169.99	52507.5	63583.4	930.05	67773	59214.4	1370.6	75761.2	105706	571.38	74898	73595.9	1242.44
413	35577	35298.3	393.38	40791	33705.2	498.4	82919.2	97512	216.27	51711.8	66637	304.38	58055.2	78994.6	675.51	70397.2	39316.6	744.93	50838	60092.8	1479.18	105172	117937	3956.94	68239.5	101348	2120.87	38132.2	53360.8	315.06	78747.8	105818	1651.84	141783	100250	2741.2
414	40836.8	44211.6	902.46	79081.5	69964.7	944.29	57318.8	47669.3	319.51	44084.2	54627.3	561.59	140748	149085	1076.9	52984.5	35545.7	1209.51	79710.8	39980.6	793.88	106078	117838	5596.32	64493.2	82963.1	1161.45	108976	98287.1	1291.39	98211	150455	4698.31	144266	141377	1586.87
415	41253.8	48448	714.67	67141.5	47069.4	663.94	54732.8	86140.4	1226.42	34339.5	26983.9	250.09	61005.8	79604.3	663.05	76898.2	57314.2	815.24	71752.5	133091	206.48	108615	87094.5	2402.11	70932.8	92646.3	691.53	92415.8	71118.1	860.63	167231	197485	7009.64	102202	96951.3	1756.86
416	74205	83373.4	1566.4	43449.8	27736.8	696.87	66547.5	90392.9	795.66	53641.5	78510.5	1037.74	115245	155129	1221.08	72463.5	51666.3	1715.03	58958.2	80322.5	555.36	71391	46001.4	1194.38	91816.5	167760	2531.16	122926	137686	1400.86	113363	131541	1477.4	49831.5	46043.3	628.34
417	43149	45255.6	453.9	84576.8	61461.6	1283.38	86085	112946	190.46	33225.8	30140.7	108.58	70896	100898	598.08	45846	36704.5	242.08	57846	58807.6	1658.07	81903	81969.9	401.39	85405.5	117270	1184.59	62095.5	84985.2	676.4	119924	211241	1331.44	96629.2	73184.7	1969.57
418	39907.5	44891.6	336.42	63786	71103	941.62	188568	226946	2322.01	100253	173157	1441.8	74886	102912	604.31	64951.5	62010.8	947.85	63133.5	101245	773.41	63785.2	42558.9	1327.88	137418	262143	529.55	67034.2	61102.9	492.17	216501	262143	3430.06	94816.5	62550.1	405.84
419	50349	62225.2	1091.14	82773.8	51070	705.77	87547.5	126753	1356.36	43332.8	46713.4	436.1	57375.8	67566.1	503.74	67784.2	66818.5	1082.24	61960.5	66234.7	679.96	69288.8	75999.8	409.4	87429.8	262143	470.81	85465.5	88933.2	5544.7	104086	168393	1265.58	68345.2	53185.5	1702.57
420	49239.8	52222.5	954.97	106699	88078.9	1338.56	116592	182031	2329.13	97854	103345	2148.46	69100.5	134627	952.3	56953.5	42043.6	1437.35	57726.8	63825.5	828.59	124619	102176	1462.27	60571.5	91331.8	555.36	73839	52895.4	902.46	74523	129155	844.61	61138.5	45098.1	412.96
421	40935.8	44789.2	902.46	47834.2	29984.1	105.91	71270.2	90045.8	547.35	42540.8	39389.6	1253.12	57519	73340.4	297.26	71832.8	50587.6	1400.86	34503.8	28334	472.59	64365	49670.9	1603.78	135106	185872	5625.69	155152	134111	6616.26	160385	205121	2764.34	226183	234818	13488.8
422	37035.8	35822.5	837.49	49041	30311.6	1262.02	126902	146964	1190.82	46142.2	55742.5	901.57	70521	80027.9	798.33	82161.8	60240.5	2351.38	31946.2	26055.6	675.51	115654	83082.4	1955.33	58808.2	59374.6	334.64	114480	140162	762.73	150773	165007	6085.82	134325	163997	1284.27
423	46008.8	56547	570.49	75584.2	47421	1484.52	98916.8	135477	1978.47	33387	24014.9	292.81	100315	166572	2305.1	93599.2	51038.8	577.61	38478.8	30394.4	551.8	49466.2	39169.8	621.22	101882	103229	1090.25	72205.5	74922	2055.9	61410.8	66240.9	811.68	66222.8	59549	1668.75
424	47329.5	54191.2	590.96	142632	104320	3438.07	91383.8	109166	1068.89	55393.5	80470.2	953.19	82672.5	127056	880.21	47124	39981.5	1125.85	122653	128649	2407.45	86228.2	49826.6	1136.53	64054.5	86824.8	1501.43	123922	103749	1019.94	132775	233222	1632.26	84111	83640.4	398.72
425	49731.8	58067.2	517.98	40067.2	20324.9	315.06	89648.2	153239	1233.54	45057	70086.6	447.67	76249.5	132855	629.23	56148.8	43512.1	670.17	124851	198529	10490.4	97509.8	111180	727.13	45850.5	63060.1	585.62	68692.5	58561.1	685.3	68102.2	82558.2	447.67	97869.8	66976.9	1974.91
426	38559	31236.3	252.76	65446.5	51370.8	1601.11	53998.5	47107.7	267	47608.5	53319.9	461.91	167746	154959	1305.63	62576.2	41380.6	833.93	89703	141448	3732.66	64746	44702.9	665.72	72813.8	105356	858.85	42357	27317.7	145.96	114218	152794	1270.92	150233	157429	2557.86
427	69832.5	68748.9	983.45	61086.8	56845.2	865.97	154606	152568	1127.63	36247.5	42552.7	426.31	56334	59557.9	1051.09	68028	62667.6	884.66	73272.8	82700.6	2187.62	98017.5	89517.1	1307.41	127323	175841	1573.52	54566.2	40473.6	447.67	59750.2	76484.8	2176.94	51751.5	39662.8	85.44
428	32644.5	19959.1	127.27	41283	25319.6	422.75	116362	150398	1666.08	45984.8	57908.7	1158.78	58469.2	38459.6	369.35	48841.5	37872.2	531.33	39597.8	34639.7	1129.41	75984	68239.9	624.78	60162	97195.1	4188.34	71457	62763.7	1493.42	101440	133128	1036.85	57147	50947.2	1110.72
429	33808.5	36118	412.07	76719	59334.5	830.37	67297.5	93845.2	789.43	54331.5	69539.3	1550.38	153830	158560	1218.41	83103	78603	1613.57	32052.8	34746.5	433.43	179837	245836	4112.69	58888.5	95285.2	1602	58193.2	56607.6	525.1	74582.2	68651	4294.25	124518	161503	761.84
430	36318.8	36800.6	423.64	80218.5	70264.6	843.72	82118.2	115808	2354.05	58453.5	52989.7	319.51	85697.2	128099	1678.54	64972.5	46889.6	1211.29	31509.8	29084.3	1634.04	33753	32388	1610.9	109022	128036	2907.63	120256	134573	1127.63	94368	136957	1041.3	178911	188880	1440.91
431	83579.2	107619	5278.59	48046.5	22356.8	608.76	113338	156984	1941.09	49659	49659.3	585.62	79228.5	125357	703.99	62794.5	44370.9	1027.06	86116.5	96305.1	2074.59	63057.8	52349.8	1868.11	176563	262143	3875.95	134056	109728	1691.89	82048.5	134973	2151.13	180912	187544	7311.35
432	37185	33177.4	1480.96	46820.2	35173.7	646.14	76974	92925.8	860.63	41969.2	40920.4	715.56	59793	67980	412.07	72264.8	61452.7	2695.81	38212.5	38621.6	461.02	61181.2	45533.3	1221.08	91025.2	125630	912.25	67458.8	75849.4	712.89	99653.2	138390	439.66	102535	55965	1210.4
433	47999.2	43877.9	227.84	73643.2	41106.4	613.21	55155	60164	480.6	39979.5	35863.4	449.45	51096	54633.5	397.83	59481	38621.6	609.65	44203.5	49126.2	507.3	112541	63716.9	1771.99	88033.5	136911	2232.12	262143	262143	4036.15	70556.2	105406	1485.41	40020	43652.7	1058.21
434	33007.5	23925	206.48	39849.8	34388.7	285.69	68383.5	93347.6	672.84	51540	61562.2	1253.12	94806	100308	615.88	79737	72276	1301.18	36399.8	39407.4	797.44	79385.2	51053.1	2746.54	162974	262143	1640.27	74898	67658.7	729.8	116472	190268	2498.23	104700	77289.4	755.61
435	88569.8	92341.1	1190.82	51615	44163.6	467.25	67350.8	96694.9	767.18	63226.5	100910	1372.38	90486	108527	521.54	59841.8	41493.6	674.62	84417.8	81162.7	1179.25	62694.8	55821.7	1117.84	5435.25	11999	63.19	42908.2	33058.2	696.87	61785.8	74538.4	739.59	96156.8	92067.8	3762.03
436	45148.5	51345.9	477.93	105430	110380	1220.19	153004	239186	1395.52	47116.5	61915.5	501.96	154065	207985	1411.54	64868.2	57684.5	2553.41	34356	34836.4	420.97	77677.5	90813.8	1145.43	80103	104885	778.75	61625.2	47115.7	686.19	48874.5	29059.4	247.42	66195	61432.2	2168.93
437	47664	51020.1	788.54	52254.8	38695.4	900.68	82767	116099	2083.49	57505.5	70152.5	643.47	102330	143007	4225.72	64365	51444.7	817.91	40962.8	44338	871.31	92331	89337.3	1022.61	61693.5	63184.7	784.09	77964.8	52849.1	1641.16	147623	177212	3069.61	69102	49192.1	1513.89
438	39005.2	30206.6	208.26	184868	161160	2929.88	69183	78410.8	781.42	33800.2	28142.7	228.73	141233	186901	2913.86	45846.8	35786	550.02	153232	249922	5926.51	74403.8	73248.8	843.72	40416	40700.6	127.27	152866	161122	5572.29	244292	262143	3870.61	63950.2	60913.4	729.8
439	35868.8	36307.6	545.57	97539.8	76529.3	2567.65	60906	68753.4	469.03	73787.2	85483.6	1817.38	85253.2	137488	1496.98	51895.5	44373.6	917.59	52237.5	54992.2	2341.59	95305.5	124193	6667.88	81285	108293	1003.03	40754.2	27627.4	346.21	124466	227915	2050.56	148790	174103	1389.29
440	34390.5	31069	209.15	46744.5	30499.4	211.82	81044.2	104980	1638.49	76533.8	88949.3	407.62	237988	262143	4206.14	76067.2	52016.1	1375.05	142965	180748	4034.37	142143	110623	1706.13	112911	156288	339.98	95610.8	77396.2	892.67	60922.5	51682.3	106.8	96188.2	118334	1755.08
441	31034.2	35756.6	97.01	43650.8	25489.6	267.89	101818	157330	3849.25	46506.8	69913.9	491.28	69627.8	100299	1404.42	76715.2	59839.1	1416.88	39478.5	36034.3	363.12	106702	56562.2	1264.69	140847	224947	4726.79	106735	104450	3611.62	58731.8	71856.8	270.56	135400	108890	3956.94
442	64412.2	90984.7	1353.69	53584.5	39676.2	825.92	83184.8	113365	142.4	44939.2	52273.3	425.42	69073.5	69961.1	520.65	79801.5	50566.2	1314.53	51363.8	62073.9	873.98	262143	262143	13766.5	146888	242244	2045.22	246450	185876	5647.94	185728	262143	974.55	66421.5	56846.1	1555.72
443	47381.2	58060	581.17	50471.2	39348.7	506.41	60963.8	65377.6	392.49	39272.2	43068	2444.83	58048.5	63371.6	540.23	57268.5	41521.2	1573.52	49143	65325.1	1123.18	55248.8	51318.3	168.21	106764	193630	2640.63	66272.2	38076.9	1160.56	75657.8	47586.5	419.19	149970	190121	1833.4
444	40661.2	38649.1	470.81	48234.8	36860.2	893.56	175688	239001	2727.85	170856	262143	1267.36	65463.8	102428	571.38	57386.2	44557	774.3	69613.5	81422.5	2097.73	102368	90980.2	2896.95	105661	162736	1126.74	188408	128981	1680.32	184344	254587	7070.16	260277	221582	3251.17
445	39777.8	50982.8	461.02	90733.5	66187.5	891.78	120178	229471	1967.79	39275.2	44804.4	1128.52	77770.5	131337	1701.68	48219	39783.9	1182.81	58119.8	87410.5	931.83	95283.8	91475.1	802.78	135612	196154	1716.81	139415	132057	4299.59	81956.2	133622	697.76	109274	81541.8	1325.21
446	50919	49937.9	998.58	68613	55407.8	316.84	91985.2	113313	490.39	36536.2	30218.2	625.67	97740	145174	1135.64	45982.5	41281.8	397.83	96940.5	85966.9	1966.9	80511	32416.5	1307.41	88956.8	151204	1324.32	71766.8	67373.9	1646.5	262143	262143	3762.03	135696	195189	2476.87
447	29752.5	29032.7	639.91	66967.5	55634.8	586.51	60018	70930.3	346.21	62853	69432.5	1459.6	114104	155131	1467.61	51111.8	36190.1	807.23	39848.2	51399.3	414.74	135910	107358	1759.53	66327.8	79948.7	712	57919.5	51002.3	1716.81	146081	203801	2875.59	169744	149827	13995.2
448	33940.5	36764.1	258.1	37533.8	26781	250.98	78418.5	93538.1	347.1	41540.2	45009.1	374.69	140906	171297	1182.81	83838	64375.5	1480.96	35396.2	30646.3	255.43	84620.2	78518.5	317.73	71350.5	100244	550.02	40416.8	37527.7	1093.81	123982	237356	2083.49	86037	58204.2	420.97
449	44829.8	44708.3	396.05	60402.8	36689.4	1161.45	63627.8	68499.7	97.9	40471.5	43672.3	671.06	129772	214021	2211.65	45417.8	37158.4	517.09	42617.2	60313.5	3221.8	102939	116657	6982.94	88049.2	123685	801.89	131026	120822	3494.14	75438	123040	886.44	45324	45843.9	319.51
450	38854.5	56661	246.53	57301.5	47663.9	660.38	221606	262143	2451.06	37315.5	29191.1	100.57	82467.8	111795	1450.7	40458.8	38463.1	389.82	57396	75435.5	1823.61	54171	35023.3	768.96	201789	262143	2949.46	43329.8	27493.9	346.21	93065.2	155386	2123.54	57992.2	43477.4	643.47
451	42642.8	47902.5	476.15	84344.2	98062.9	283.02	60878.2	88160.7	642.58	55390.5	65299.3	1013.71	220154	262143	4122.48	62303.2	59964.6	922.93	54144.8	65656.2	993.24	112017	87989	1017.27	79466.2	118016	1487.19	93194.2	116310	1189.93	122250	207308	1390.18	93005.2	107497	1496.09
452	49002	65824.4	1431.12	50985.8	27615.8	380.92	55257.8	65663.3	596.3	67587	55245.9	1291.39	53736.8	48014.6	1285.16	69483	62166.5	816.13	52532.2	79585.6	1578.86	111427	52883.8	2752.77	91821.8	112933	765.4	40010.2	32386.2	438.77	179326	262143	3454.09	77277	78517.6	719.12
453	38187.8	16889.5	207.37	77808	62035.7	1325.21	51930	39741.2	101.46	55131	73446.4	1221.97	91659.8	109316	1140.98	78273	74938.9	620.33	112211	193409	2176.94	39555.8	32134.3	184.23	46149.8	50623.2	1380.39	138064	251619	2918.31	124641	120356	1028.84	45262.5	35961.3	485.94
454	36480	39783	943.4	74545.5	51418.9	687.97	80046.8	127448	291.92	89016	139040	441.44	68120.2	125540	529.55	86256.8	56541.7	768.07	72315.8	110985	884.66	65480.2	58675.9	1292.28	86940.8	106666	898.01	53040	42612.3	987.9	84605.2	136057	653.26	142510	159456	2432.37
455	36907.5	19767.8	322.18	71208.8	46268.4	772.52	92336.2	131312	446.78	50498.2	54667.4	313.28	58560.8	53982.1	558.03	55899.8	56829.2	712.89	115960	135063	1554.83	59873.2	46596.8	890.89	170409	258897	2468.86	94732.5	71651.2	2365.62	198583	262143	8967.64	71924.2	55536	748.49
456	64299	66680.6	1229.09	76839.8	62157.6	1266.47	70182.8	106391	987.9	60369	78605.7	767.18	53176.5	63181.1	343.54	98583.8	69861.4	1593.1	231530	262143	8471.91	97712.2	115890	2235.68	167466	237862	2377.19	83427	78497.1	4717	129084	182210	469.92	70646.2	49222.3	2589.01
457	53619.8	59249.1	725.35	66066.8	52202.1	741.37	81635.2	105024	658.6	43077	44338.9	358.67	63960.8	79895.3	703.1	41817.8	32892.6	438.77	44034	52376.5	824.14	38163.8	21554	21.36	58542.8	95352.8	2147.57	63333	68486.4	805.45	122545	179726	1549.49	113224	113768	1897.48
458	36650.2	40677.4	467.25	49248	42884.6	778.75	85038	128304	896.23	52120.5	58985.6	690.64	97718.2	122096	1521.9	47849.2	36474	540.23	43955.2	46098.4	545.57	64659.8	52751.2	2262.38	100250	164009	2444.83	125153	142864	11793.4	71759.2	85098.2	269.67	63434.2	51059.3	946.07
459	39578.2	46680.5	445	75314.2	54656.7	899.79	52431	50271.6	275.01	43372.5	55961.4	801	105865	203310	1146.32	52793.2	43219.3	809.9	44139.8	69536.6	603.42	62958.8	41522.1	956.75	64050	86200.1	364.01	106187	81234.8	1302.96	94183.5	113301	696.87	67686	46039.7	784.98
460	46427.2	50128.4	586.51	55305	43894.8	1140.09	64335	83664.4	1700.79	37254	31336.9	523.32	84717.8	136643	1637.6	44952.8	34386.9	720.9	35715.8	43209.5	166.43	48471	33030.6	686.19	51236.2	61499	354.22	114516	84289.2	3301.9	74810.2	65579.6	1312.75	234890	246012	2965.48
461	39640.5	38366.1	55.18	90680.2	76579.2	3274.31	79026.8	118047	271.45	39370.5	30606.2	283.02	80397	124301	1555.72	43587	26752.5	304.38	36445.5	26945.6	293.7	122238	128202	5087.24	67039.5	79611.4	674.62	70862.2	69426.2	472.59	45067.5	50238.7	903.35	95930.2	102079	1655.4
462	69885	71661.9	2599.69	53898	41210.6	391.6	97618.5	149440	539.34	78160.5	79434.3	930.05	115894	105501	1561.95	67445.2	49990.4	946.96	60867.8	71805.2	2045.22	68559.8	46934.1	869.53	69574.5	81268.6	200.25	137259	132425	2065.69	106313	178236	1229.09	60882.8	45437.2	1123.18
463	36885	27397.8	260.77	72287.2	51493.6	2228.56	148317	152825	1609.12	41869.5	46517.6	435.21	57983.2	58464.1	284.8	46313.2	31088.6	323.07	54252.8	43077.8	426.31	60589.5	63154.4	1259.35	86644.5	209759	1041.3	73189.5	73160.7	1318.09	128210	173975	1225.53	69943.5	69559.7	1448.92
464	35707.5	26692.9	351.55	79294.5	45833.2	1033.29	57693	69423.6	548.24	86783.2	64430.7	1651.84	66015.8	95000.4	1310.97	81093.8	71791	2743.87	93456	129367	3702.4	73466.2	58808.5	609.65	77616	116342	1721.26	84940.5	65355.4	879.32	102133	125229	830.37	102458	106041	8071.41
465	77243.2	90562.8	3332.16	51609.8	28149.8	471.7	104654	151143	1354.58	40553.2	45408.7	116.59	70179	98677.9	233.18	177737	138745	2322.01	41650.5	45985.4	388.93	63844.5	47062.3	1285.16	80174.2	122749	879.32	111112	108811	1820.94	182222	249479	2312.22	67342.5	44995.7	119.26
466	33299.2	34361.1	299.93	114768	69062.2	1128.52	76253.2	114697	250.98	63755.2	75441.7	1960.67	70636.5	98321	890.89	59418.8	50527.1	946.07	35499	40578.7	525.1	117311	94453	1225.53	112510	165226	11575.3	65238	64927.3	2453.73	129228	146423	1928.63	102636	102513	2053.23
467	39531	42576.7	375.58	113269	129972	1277.15	130362	180227	1358.14	38113.5	33141.8	545.57	53780.2	80095.5	494.84	103598	93160.8	1239.77	37398	48778.2	456.57	53157	44410.1	446.78	106304	171443	295.48	38499.8	35765.5	228.73	88410	118980	1240.66	181916	147385	1859.21
468	42348.8	52036.5	1001.25	41139	33297.6	318.62	56097	67318.7	412.96	33801	32960.3	347.99	63239.2	39349.6	2071.03	61198.5	66362.9	900.68	56335.5	87150.6	1745.29	89957.2	75132	2143.12	54276.8	64929.9	203.81	76097.2	70562.8	461.02	143684	160649	9776.65	127652	151561	1982.92
469	37900.5	39795.5	104.13	52341	37795.6	323.96	79191	83869.1	595.41	36621.8	32257.2	178	49048.5	50322.4	347.1	77736.8	59152.1	768.96	46043.2	44475.1	704.88	145413	110862	3547.54	153436	197384	6150.79	143521	172077	4576.38	67275	52817.9	382.7	44028.8	29356.7	340.87
470	34056	38664.3	289.25	39060.8	32403.1	772.52	113248	143741	1109.83	56128.5	70559.2	767.18	187583	201497	3706.85	62353.5	41805.1	451.23	74570.2	107416	1384.84	64758.8	57991.5	372.91	74938.5	71483	209.15	69912	47146.9	614.1	77198.2	106855	426.31	46833	41830.9	471.7
471	89936.2	116310	1068.89	52998.8	34969.9	233.18	67222.5	89856.2	531.33	56850	75884.1	973.66	262143	262143	8576.93	48285.8	30891.9	284.8	51444	70164.9	1230.87	50282.2	40375.7	376.47	78426.8	96166.3	1545.93	244157	242571	1734.61	74025	98546.1	925.6	136118	149762	3653.45
472	43199.2	49717.2	437.88	41319.8	34068.3	578.5	145688	258584	2643.3	35730	36195.4	579.39	69684	75397.2	908.69	71929.5	43625.1	834.82	102385	140343	1132.08	136504	119211	1078.68	52326	60426.6	129.05	193158	159727	2629.95	66109.5	82335.7	503.74	51328.5	36928.8	876.65
473	77412	95165	808.12	73164.8	67738.8	607.87	105858	114567	960.31	35472	34785.6	258.1	58770.8	73037.9	517.98	61125	59588.2	1243.33	98024.2	153586	2714.5	38871	28909	1219.3	110800	170633	1098.26	73970.2	60049.2	1893.03	91580.2	155928	1155.22	110942	128820	3438.96
474	56155.5	77445.1	198.47	56121	55374.9	646.14	141614	199450	1536.14	40724.2	33456.9	80.99	76610.2	125994	1191.71	59135.2	56822.1	489.5	44684.2	51792.7	944.29	70144.5	44270.4	1781.78	117444	180958	1072.45	86517.8	52801.9	980.78	86599.5	173354	451.23	46656.8	43779.1	1068
475	39190.5	44119.1	364.9	47850	43493.4	315.95	70096.5	132311	1111.61	40837.5	42782.3	774.3	91364.2	107794	1591.32	110966	93021.9	3567.12	58880.2	77716.6	723.57	199953	247068	1079.57	118051	128456	7352.29	256524	233704	2620.16	57188.2	60448.8	1812.04	82447.5	76047.8	4593.29
476	38970	50539.5	716.45	47109.8	25721.9	76.54	75250.5	122263	1079.57	46809	79000.9	635.46	79314.8	118537	914.92	63423	46117.1	1626.03	47817.8	59560.6	1417.77	87606.8	79828.5	7768.81	97470.8	111132	753.83	77009.2	71808.8	1828.95	67511.2	82495	525.1	62479.5	43678.5	75.65
477	35781.8	43225.5	1355.47	62926.5	41646.7	818.8	120878	163723	3152.38	36842.2	32805.4	250.98	96289.5	148739	1993.6	67023	48348.4	703.1	37617.8	28214.8	122.82	45159.8	29970.8	126.38	168773	241550	1578.86	58463.2	50915.1	274.12	68661.8	119434	1516.56	73605	52377.4	721.79
478	55163.2	57918.5	665.72	45776.2	44459.9	614.99	130409	197022	2828.42	42887.2	32358.6	991.46	80354.2	138594	570.49	40963.5	29927.1	606.09	38532	35208.4	373.8	99694.5	80147.2	1232.65	83689.5	135187	803.67	73124.2	74416.5	639.02	62226.8	70725.6	222.5	65680.5	61306.8	742.26
479	39243.8	39955.7	453.9	75685.5	65051	517.09	75830.2	108179	735.14	43620	46756.1	482.38	69192.8	86354.9	590.96	47658.8	36218.6	388.93	29261.2	30065.1	694.2	38881.5	35717.5	996.8	145219	203459	1602.89	45447.8	43381.3	548.24	233180	240172	2126.21	262143	262143	9887.01
480	40143.8	45664.1	727.13	55587.8	41561.2	1106.27	53733.8	81443.9	461.91	40248	43769.3	240.3	80205	119401	801.89	134632	118845	2589.01	36960	40028.6	396.94	61662.8	57348.9	91.67	65137.5	72707.7	518.87	81799.5	66496.4	4740.14	61428	102610	1287.83	67440.8	70385.6	602.53
481	103381	93366.3	2047.89	44224.5	26669.7	356	53239.5	35508.3	240.3	32534.2	22506.3	188.68	140968	171224	834.82	37922.2	24715.3	479.71	29222.2	29811.4	857.07	172470	179488	10025.8	98415	130445	754.72	84344.2	61382.4	1316.31	60349.5	89077.4	1558.39	37180.5	30608	657.71
482	55615.5	65675.8	696.87	51954	50534.2	966.54	61994.2	79932.7	1006.59	60482.2	94269.7	1094.7	94674.8	172519	1455.15	80367.8	67951.5	1513.89	56072.2	67641.8	1945.54	220682	214413	1173.91	74583	91521.4	1188.15	64606.5	45602.7	614.1	145592	171060	1375.94	121300	102216	2978.83
483	58448.2	89655.9	1578.86	67287	55889.3	597.19	57881.2	72941.7	1147.21	47079.8	57453.1	254.54	173263	221701	2866.69	50313	35478.1	655.04	36890.2	26163.3	920.26	51673.5	41263.1	531.33	106851	146944	1561.95	116269	139694	505.52	83374.5	114118	180.67	87992.2	76427.9	1830.73
484	40507.5	49118.2	618.55	95137.5	69047.1	379.14	65148.8	83524.7	736.92	48176.2	59901.4	580.28	100744	144403	1305.63	84978	77334.8	2475.09	96600.8	119798	1258.46	67018.5	54666.5	1585.09	79736.2	144641	1023.5	77790	89911.4	1444.47	154840	180422	4816.68	262143	262143	4257.76
485	33680.2	23623.3	283.91	67394.2	53968.7	804.56	100100	170435	871.31	39319.5	41860.3	382.7	130550	190531	1529.91	52751.2	38626	645.25	39942.8	44924.5	289.25	162939	138081	5923.84	136771	160617	1594.88	46217.2	38141.8	364.9	65866.5	93169.6	2275.73	43932	38738.1	1155.22
486	34533.8	34326.4	437.88	70722	57609.7	1075.12	105144	154124	973.66	34501.5	35033.1	65.86	52299.8	54444	339.09	47240.2	37209.1	543.79	41049	59903.2	557.14	131365	125415	1585.98	127166	157771	4295.14	137748	159910	13635.7	142728	170641	1311.86	41916	25694.3	728.91
487	70277.2	77000.1	988.79	38565	27345.2	323.96	105317	98790	334.64	41792.2	44891.6	559.81	87564.8	127379	517.09	58155	44433.2	1002.14	45748.5	60637.5	1124.07	76278.8	81985	966.54	64098.8	72037.5	1680.32	74781.8	65403.4	780.53	77384.2	107491	666.61	91860.8	68131.3	2080.82
488	62057.2	107684	933.61	48141	42724.4	951.41	88562.2	133777	1094.7	39346.5	34524	481.49	70778.2	88739.2	585.62	48198.8	31254.1	953.19	65263.5	42030.2	1257.57	72435	55856.4	716.45	191582	262143	1981.14	82486.5	67063.3	1559.28	236474	262143	4001.44	65362.5	66476.8	1031.51
489	55851	62188.8	233.18	63266.2	55963.2	876.65	59699.2	80351	522.43	38826.8	37719.1	352.44	74124	99450.4	625.67	88239.8	71371.8	3583.14	54323.2	66528.4	929.16	93121.5	72449.6	1789.79	45912.8	78585.2	451.23	149258	124766	6124.09	75665.2	103409	652.37	76299.8	74232.2	1374.16
490	40541.2	45873.3	468.14	123849	89010.7	2395.88	66774.8	81382.5	470.81	46657.5	69865	507.3	87777	159343	1666.97	92046.8	63946.5	1877.01	64949.2	92508.4	1435.57	71991	54904.1	884.66	71428.5	84066.7	621.22	106349	173219	7716.3	191349	259151	1078.68	89367	73519.3	2259.71
491	40305	40682.8	319.51	41673	41247.9	819.69	57282.8	56136.8	112.14	41803.5	36627.9	516.2	62309.2	105196	641.69	46742.2	19164.4	758.28	61959.8	66545.3	881.99	144034	158521	11510.4	108920	158235	2038.1	76548.8	59446.7	1804.03	82567.5	106581	378.25	78021.8	71658.4	3973.85
492	32026.5	29675.3	155.75	60008.2	50084.8	1503.21	182128	229762	4348.54	62860.5	75271.8	756.5	54373.5	71271.2	323.96	118051	102100	574.05	41075.2	53335.9	751.16	133418	121804	2592.57	91100.2	103975	986.12	110788	91795.5	1354.58	62907.8	48687.4	235.85	96139.5	69426.2	478.82
493	39710.2	44359.4	161.98	43410.8	27476.1	106.8	82743.8	130691	1728.38	37137	38429.3	231.4	72216.8	103069	614.99	63615	55214.7	1146.32	35393.2	37955.8	907.8	177999	128322	2733.19	105685	181568	4314.72	60193.5	59719.9	756.5	60851.2	45550.2	68.53	89499.8	126794	1139.2
494	44358	50580.5	451.23	83339.2	49206.3	773.41	55089.8	54422.6	596.3	37365	30512.8	240.3	117153	171204	1989.15	52533	22183.2	899.79	33041.2	34519.5	146.85	95473.5	90075.1	4005	87602.2	119678	2136	46637.2	42275	666.61	138634	194870	3091.86	111928	156897	1830.73
495	32674.5	42744	422.75	74534.2	65784.4	842.83	165800	262143	13338.4	49162.5	47318.6	513.53	56631.8	77066.9	364.9	78775.5	58288.8	1367.04	63053.2	68212.3	1277.15	84328.5	53914.4	1025.28	95973	213960	2054.12	72588	61925.3	10403.2	106460	188223	471.7	75399.8	63926	1093.81
496	56143.5	60110.6	323.96	70107.8	44004.3	680.85	168359	202317	1343.9	39624.8	52145.1	457.46	56508.8	64433.3	324.85	125721	114450	1786.23	38391	45892	1467.61	50928.8	38543.2	3964.06	110297	186880	2855.12	67953	55471	760.95	99177.8	157285	2066.58	189485	90759.5	4664.49
497	34807.5	23976.6	353.33	51192.8	31566.5	1165.9	189094	262143	2771.46	40752.8	46903.9	414.74	66739.5	87873.3	545.57	79962.8	63488.1	2105.74	74725.5	189898	2428.81	116002	138829	4698.31	89937	162801	713.78	55392	41559.4	355.11	137070	245762	4439.32	109478	78753.4	704.88
498	51990.8	46466	664.83	58818.8	57858	1042.19	96303	140747	1647.39	50586.8	64153	552.69	110822	187069	1167.68	72699.8	66825.6	921.15	44420.2	38252.2	584.73	70082.2	44187.6	698.65	126934	198329	400.5	94190.2	79706.6	7103.98	132803	246842	665.72	109986	88832.7	295.48
499	50061	52417.4	479.71	43870.5	20653.3	511.75	60089.2	72717.4	650.59	41243.2	36887.8	1019.94	70976.2	103556	774.3	84785.2	72768.2	1359.92	90233.2	154279	4611.98	106136	88895.9	2815.07	102598	143441	1121.4	43196.2	25661.4	72.98	119902	105092	1362.59	74276.2	59552.6	252.76
500	45001.5	54855.1	523.32	57555.8	41720.5	771.63	72151.5	77056.2	412.96	45951.8	51693	502.85	83322.8	111204	814.35	48514.5	48011.9	170.88	93285.8	153875	4968.87	44323.5	26318.2	282.13	86922	125942	2894.28	60894.8	45075.8	2281.07	62601	89534	602.53	87690.8	85958	1162.34
501	41271	37783.2	591.85	110955	68764.1	2112.86	74088.8	102556	565.15	39776.2	34787.4	683.52	73356.8	106815	689.75	63465.8	59053.3	1173.91	46827.8	56822.1	578.5	199412	262143	4414.4	73956	97969.4	870.42	54981.8	93702.8	543.79	47932.5	64748.4	1143.65	38045.2	31776.6	618.55
502	47502	54631.8	872.2	91140	68257.7	1048.42	120503	140025	310.61	51063.8	56520.3	584.73	126088	176474	1412.43	50769.8	31846.9	337.31	50066.2	43570.8	795.66	113893	87673	1556.61	69435.8	66923.5	700.43	86936.2	78319.1	3964.06	58297.5	60523.6	419.19	193642	193828	3829.67
503	40616.2	54058.6	372.91	43948.5	36742.8	353.33	92511.8	148992	1020.83	61908.8	68143.7	1125.85	68920.5	92134.6	2534.72	76386	60336.7	694.2	63273.8	72672.9	2549.85	32054.2	26036.1	455.68	103880	101184	689.75	97603.5	79623	3064.27	101135	141461	1451.59	103960	104338	9439.34
504	46841.2	44691.3	370.24	68223.8	51029	1254.01	91709.2	115000	1655.4	37230	38510.3	461.91	56133.8	75357.2	450.34	40373.2	29135	424.53	27945	31415.2	279.46	57766.5	57697.8	2152.91	107724	125357	1861.88	159256	209031	4249.75	66060.8	88406.4	263.44	115122	106841	1231.76
505	133088	165601	2658.43	48579.8	34081.7	450.34	59804.2	69895.3	491.28	36905.2	33717.6	372.91	62331	70357.2	427.2	109970	88046.8	86.33	33121.5	36332.5	153.97	96027	98231.1	3705.07	171634	179477	2144.01	55113	60641.9	1131.19	78120.8	133917	2047.89	58111.5	80469.4	1151.66
506	31780.5	23838.7	56.07	47194.5	13986.3	190.46	91921.5	125239	662.16	68703.8	88367.2	708.44	52345.5	71749.1	312.39	52190.2	38515.6	698.65	58263.8	89539.3	3689.05	55683.8	40688.1	254.54	72976.5	93008.6	989.68	85202.2	86685.1	1718.59	49690.5	54053.3	230.51	52001.2	51199.9	1318.98
507	34559.2	30312.5	374.69	47835	38450.7	483.27	56247	39999.3	542.01	67926	82268	1008.37	63514.5	84416.5	404.95	62124	57002.7	1460.49	63345	71433.2	1666.97	244214	233296	10439.7	121942	119669	1048.42	45088.5	19655.7	315.06	146000	238963	11916.2	73068	96936.1	944.29
508	32781.8	26536.2	258.1	43173	22115.6	405.84	67125	76761.6	640.8	41451	35062.4	917.59	56288.2	68809.5	278.57	94581	81325.5	1104.49	42114	46061.9	546.46	130254	73532.7	1489.86	73642.5	106322	901.57	112809	110686	1245.11	165253	154515	3281.43	115278	108204	494.84
509	33206.2	39004.2	386.26	81057	102711	881.1	86855.2	126820	776.97	101350	136495	1058.21	84476.2	133902	374.69	40318.5	32977.2	411.18	48855.8	54609.5	831.26	49690.5	34545.3	424.53	56068.5	43105.4	258.99	262143	262143	4568.37	96315.8	146281	336.42	113555	119018	2475.98
510	32111.2	36632.4	860.63	49730.2	47089.9	732.47	113309	123391	1398.19	47210.2	60477.3	561.59	59739	69212.6	479.71	94292.2	86111.9	308.83	50352.8	68699.1	1753.3	130296	85361.7	1638.49	65156.2	95072.5	1303.85	109751	100485	2177.83	85828.5	143070	1090.25	56851.5	48901.1	317.73
511	35258.2	33263.8	626.56	44966.2	25196.8	346.21	82753.5	114442	982.56	46265.2	56943.1	413.85	144892	165965	2493.78	83396.2	70231.7	239.41	48226.5	39244.6	1339.45	55779.8	51036.2	111.25	56737.5	43301.2	383.59	43518	26919.8	694.2	128724	166887	3049.14	133602	154439	1884.13
512	53283.8	57969.3	752.94	39016.5	20254.6	118.37	99636	137005	1035.07	38939.2	29955.6	323.96	150736	132785	1682.99	44345.2	34720.7	882.88	41695.5	49526.7	573.16	138585	121305	2225	50454.8	58109	438.77	69904.5	50230.7	1034.18	57927	63584.3	707.55	43084.5	31794.4	84.55
513	34335.8	35956	445	65881.5	53816.5	1534.36	59693.2	94630.1	894.45	53159.2	62060.6	1354.58	91347.8	102649	754.72	58443	43796.9	663.94	45917.2	54306	865.97	131414	174573	9121.61	59627.2	77074	775.19	165994	255628	2053.23	75783.8	124971	900.68	77345.2	56062.9	688.86
514	32043	21617.2	204.7	65276.2	50568	1599.33	71253	109804	204.7	64965.8	86978.8	1134.75	48699.8	36538.9	445.89	50608.5	34035.4	759.17	47071.5	52015.2	463.69	183825	134458	2471.53	93922.5	99591.9	719.12	85005.8	87042.9	954.97	91576.5	175678	1093.81	73861.5	88083.3	2338.92
515	56284.5	62250.2	678.18	45758.2	39152.9	687.08	72216	103000	1963.34	43629	43847.6	839.27	121798	186046	2315.78	41071.5	26329.8	530.44	47245.5	66097.6	2711.83	70186.5	55188.9	571.38	175616	262143	2541.84	99895.5	115404	685.3	66207.8	76600.5	1284.27	65977.5	53273.6	782.31
516	57427.5	70488.9	593.63	92498.2	76664.6	1032.4	68715	91397.7	245.64	40817.2	40432.7	548.24	54252.8	58707.1	414.74	133236	90449.8	1246	72216	104070	1084.02	91352.2	84267.9	2917.42	55323.8	59840.9	345.32	88527.8	75081.3	624.78	154010	234153	2024.75	127009	105607	1364.37
517	35562	42065.8	909.58	63573.8	50639.2	710.22	161602	184453	1833.4	39960	30447.8	332.86	80498.2	114706	1283.38	72273.8	78745.4	1068	70003.5	175363	3504.82	36845.2	28556.5	190.46	136378	180705	4222.16	47526.8	60879.6	823.25	155633	207453	2635.29	262143	262143	7610.39
518	92106.8	92681	1045.75	45378.8	32414.7	771.63	80304	93693	663.05	56292	76321.9	1305.63	60978	75862.7	454.79	57430.5	44824	784.98	124879	188465	3544.87	114281	150579	8311.71	123446	172378	1525.46	74426.2	68473	918.48	46614.8	62029.4	380.03	79885.5	62530.5	1781.78
519	38142	44650.4	440.55	98829	90915.3	922.93	122888	188094	4465.13	40786.5	43450.7	460.13	83953.5	103660	564.26	41887.5	32468.1	552.69	33969.8	44298	649.7	161140	193854	18578.8	158553	230798	501.07	73959	46668	830.37	87162	124889	637.24	81840	94358.7	334.64
520	48261.8	56128.7	631.9	103463	56117.2	857.96	142741	219699	1902.82	56945.2	92606.3	769.85	79437	140200	1343.9	53238.8	39797.2	537.56	46840.5	42817	882.88	57292.5	46627.1	613.21	55306.5	60073.2	401.39	40575.8	31257.7	955.86	94858.5	120067	989.68	56228.2	54542.8	3557.33
521	39348.8	26577.2	224.28	62417.2	45743.3	545.57	109792	171827	552.69	49690.5	58185.5	1096.48	66831.8	90010.1	234.07	95779.5	94641.7	1452.48	80493.8	84646.1	326.63	50196	39042.5	1243.33	64764	80972.2	924.71	169856	146483	4603.97	117447	217928	1758.64	207343	183131	2859.57
522	70282.5	80630.4	2441.27	52070.2	50227.1	1090.25	80786.2	102297	1129.41	67458.8	107120	825.92	131214	137566	839.27	53604	50723.8	1163.23	51310.5	70310.9	1344.79	133076	104628	3255.62	125870	158889	1432.01	46535.2	36359.2	931.83	95133.8	129461	1189.04	60907.5	52388.1	256.32
523	60755.2	59579.3	683.52	64752.8	48099.2	587.4	58982.2	73850.4	512.64	38309.2	42155.7	670.17	73205.2	110345	792.1	120745	116044	2122.65	47993.2	40778	2005.17	33492.8	27381.7	598.97	71038.5	114087	1071.56	87966.8	53080.5	364.9	148906	198937	1515.67	56478	48942.9	307.94
524	38682	42833.9	420.97	55044	31109.9	210.04	60726.8	58282.5	258.99	37477.5	33293.1	257.21	59405.2	81366.5	940.73	49314.8	24574.7	505.52	38579.2	36000.5	181.56	61887.8	43695.4	609.65	54948	73643	778.75	41086.5	35100.7	178	55143	62339.2	958.53	119187	105325	622.11
525	49029.8	44581.9	876.65	132004	100811	1330.55	59994	80003	686.19	37595.2	44815.9	345.32	115362	173852	1936.64	125846	98353.9	3456.76	45006	60496	467.25	46297.5	33274.4	1379.5	68451.8	111699	1674.09	55043.2	68505.1	291.92	102778	125132	756.5	45594	39187.6	291.92
526	35290.5	32016	728.91	45441.8	40139.9	477.04	96375	103756	695.98	39996	35847.4	337.31	80145.8	116394	2038.1	40674	28833.3	623.89	50316	53045.8	598.97	152963	175451	5482.4	109438	120838	2590.79	76260.8	67316.9	306.16	85679.2	211584	1232.65	51022.5	39019.4	72.98
527	53451	79725.3	1604.67	45195.8	37843.7	275.9	86517	124144	2476.87	37665.8	38567.3	291.03	73341	48810.3	390.71	68794.5	60911.6	710.22	77187	106853	2816.85	71244.8	59906.8	1793.35	53718	54946.8	248.31	70380.8	61470.5	643.47	153718	184586	2163.59	125945	76384.2	1504.99
528	40475.2	41319.1	470.81	52718.2	75551.2	1221.08	67264.5	95716.8	1174.8	44794.5	49428.8	891.78	56289.8	59506.3	515.31	128630	161708	1496.09	51818.2	73223.9	893.56	58891.5	53868.1	2477.76	184964	262143	817.91	130170	140466	2935.22	84550.5	105267	1261.13	130880	155845	1371.49
529	39365.2	54220.6	471.7	52412.2	43124.9	752.94	81667.5	119461	1054.65	55352.2	68027.1	730.69	131802	262143	2176.94	73438.5	54853.4	1447.14	55008	56808.7	1830.73	234648	209284	5413.87	118402	195894	5574.07	62959.5	55250.3	617.66	96801.8	142535	2230.34	89127	84728.9	755.61
530	42201.8	47438.8	745.82	64808.2	69590.9	376.47	61185.8	79400.5	524.21	45550.5	50325.1	590.96	120843	228742	2499.12	124772	92051.8	3947.15	44880	59889	1744.4	61974.8	51967.1	1571.74	56746.5	45042	105.91	209392	172249	2249.03	50570.2	159294	782.31	65604.8	45508.4	306.16
531	40315.5	44221.4	367.57	58506	58369.8	574.94	65256	76831	161.09	49536	60066.1	776.08	142993	256167	2164.48	76014.8	78398.3	1019.05	71635.5	84293.7	696.87	64411.5	62243	1197.05	103160	140896	926.49	80499.8	54824	1367.93	112112	149637	975.44	82753.5	54312.2	304.38
532	53413.5	54389.7	1485.41	65555.2	39229.4	879.32	105033	144568	220.72	91881.8	86277.5	986.12	75774	144524	263.44	71052	65775.4	1043.97	57918.8	51494.5	880.21	48615	39891.6	407.62	243760	262143	11352	46412.2	48691.9	517.98	79962	112268	987.9	56848.5	57753	2160.92
533	38705.2	25110.5	232.29	51400.5	43428.4	484.16	53186.2	78665.3	843.72	37116	28165.8	236.74	54915	67923	506.41	84534.8	71464.3	2642.41	68438.2	81507.1	1093.81	50118.8	30478.9	687.97	103468	169200	3380.22	60606.8	73020	151.3	57954.8	139841	268.78	79167	64852.5	655.04
534	65199	103565	1834.29	61442.2	51302.3	1202.39	111978	148752	2106.63	73009.5	89616.8	4371.68	131743	190750	1367.93	119215	73840.6	1763.09	28840.5	33983.8	195.8	87621.8	57089.1	728.91	71041.5	96572.1	2686.02	73798.5	66968	1020.83	122576	219567	1958.89	73749.8	57647.1	838.38
535	41362.5	46673.4	1116.95	61532.2	45253.8	114.81	94596.8	122962	734.25	42458.2	35216.4	169.99	72335.2	102692	1450.7	91686.8	78026.3	2123.54	31801.5	37033.8	930.05	211847	156650	5090.8	101984	124417	2128.88	85951.5	74983.4	1140.98	147953	220668	2002.5	55263.8	44367.4	521.54
536	47707.5	71899.5	843.72	135872	132858	1723.04	63513.8	74634.5	590.07	36800.2	42768.9	605.2	123342	182215	1106.27	44829	35436.2	564.26	44470.5	43543.2	546.46	56112.8	40972.9	476.15	78933.8	104296	1632.26	219776	262143	14418.9	221886	262143	4426.86	105096	92296.6	1453.37
537	36342.8	29816.8	253.65	51004.5	44908.5	767.18	102451	126209	1061.77	32457	45260.1	887.33	67842.8	95630.5	560.7	128458	124706	2637.96	42041.2	54480.5	492.17	70091.2	55571.6	1025.28	43715.2	59814.2	618.55	222687	253082	3555.55	217466	262143	8633.89	78528.8	97603.6	735.14
538	32583.8	24403.8	89	46732.5	36625.3	530.44	52023	47762.7	306.16	41354.2	42464.6	395.16	59446.5	60056.3	456.57	66600	49535.6	635.46	51105	54318.5	261.66	116884	100367	5545.59	100354	159485	1827.17	75044.2	76775.9	264.33	88678.5	133626	210.04	76742.2	44888.9	580.28
539	45212.2	53676.8	1306.52	39517.5	23094.6	637.24	76621.5	101328	760.95	51093	59171.6	953.19	86067	138732	1719.48	75229.5	77481.6	1699.9	224936	262143	3081.18	48209.2	35960.4	477.93	114919	207698	1182.81	56288.2	47379.1	566.04	185016	238807	1429.34	47311.5	37615.8	794.77
540	41403.8	45576	367.57	95256.8	77909.7	953.19	120186	219058	1348.35	41194.5	35815.4	296.37	92745	109636	340.87	52823.2	41442.8	620.33	53526.8	58614.5	1642.05	57214.5	21905.6	702.21	57492	66778.5	772.52	155907	166680	1890.36	82480.5	108410	185.12	143889	104646	3582.25
541	43374.8	44524	1404.42	102476	74921.1	1019.05	56823.8	67928.4	577.61	68111.2	103258	669.28	85830.8	163501	323.96	40836.8	27834.8	428.09	85924.5	115326	1046.64	59151.8	53220.2	2241.02	76197.8	169101	746.71	89661.8	99420.1	5457.48	66588	93166.1	1211.29	248692	246564	4198.13
542	33216.8	28768.4	242.08	37381.5	21123.3	247.42	67611.8	100096	645.25	49156.5	60991.7	270.56	96613.5	152889	622.11	47209.5	38227.3	266.11	36655.5	30287.6	830.37	262143	262143	6387.53	65356.5	62575	192.24	127126	117620	6254.03	90174.8	116313	970.1	157447	113382	1890.36
543	48600.8	83568.3	792.1	67012.5	43283.4	741.37	204136	262143	2937.89	33109.5	35757.5	865.97	58052.2	74378.2	324.85	76038.8	45056.2	680.85	100195	205741	6306.54	86463.8	73286.2	906.02	262143	262143	4725.01	66053.2	71986.8	3685.49	130612	161177	2589.9	89461.5	105640	1448.03
544	37992	26655.5	291.03	41160	23897.4	686.19	65850	73852.2	305.27	102609	127002	1975.8	99901.5	160961	1312.75	66411.8	52411.2	730.69	103946	159011	1406.2	120978	127274	1553.94	103411	170378	1430.23	130482	126271	4296.92	91353	145227	923.82	53884.5	53569.1	907.8
545	115723	108645	1160.56	42769.5	32349.7	684.41	61893.8	76961	594.52	41052	40010.8	653.26	101037	221349	3267.19	41943	38013.7	443.22	35889.8	35686.3	315.95	69497.2	49061.2	815.24	77613.8	118948	891.78	79067.2	60904.5	1167.68	119102	114783	896.23	64584.8	54969.1	362.23
546	29379	33182.8	174.44	118995	143548	1915.28	58376.2	54631.8	627.45	38241	23828.9	259.88	107518	203458	1306.52	86825.2	80378.6	1205.06	65982	82783.4	3437.18	63231.8	51679.6	619.44	56188.5	51002.3	567.82	61587	57760.1	585.62	120904	239694	3592.93	77982.8	53304.8	1279.82
547	31163.2	31350.2	232.29	44501.2	26562	18.69	107384	171333	941.62	35769	26001.3	252.76	71916.8	102438	234.07	87110.2	86702.9	1706.13	74637.8	102191	1059.99	69974.2	69493	1126.74	59484	75578.8	720.01	57264.8	52492.2	768.96	63638.2	50902.7	296.37	73748.2	81799.9	1563.73
548	41227.5	48255.8	524.21	62552.2	52024.1	697.76	208694	262143	4817.57	44400.8	61398.4	1593.99	167644	262143	2075.48	55072.5	36517.6	1305.63	51687	65688.2	814.35	69912	93244.4	282.13	57215.2	85222.8	570.49	86583.8	85882.3	3929.35	96935.2	151616	865.08	89219.2	64265.1	2514.25
549	36597	19511.5	88.11	72069.8	63677.7	852.62	66379.5	95245.1	1316.31	35897.2	28295.8	465.47	144598	236880	2077.26	50041.5	47990.6	253.65	44784	52414.8	777.86	82342.5	52662.2	1190.82	61259.2	101058	200.25	45217.5	33270	302.6	106955	134811	2386.98	102886	149530	1681.21
550	33614.2	32945.1	137.06	38221.5	25181.7	299.04	74790	64107.6	617.66	54020.2	66421.6	603.42	68637.8	89523.3	523.32	44147.2	31409	626.56	66909	103695	628.34	159388	176617	1847.64	60633.8	115966	203.81	42915.8	34278.3	397.83	129095	178660	2114.64	71482.5	59775.1	1583.31
551	32355	26645.7	235.85	62225.2	65109.7	694.2	94356.8	147653	1019.05	56284.5	69125.4	757.39	76030.5	114852	878.43	53734.5	35573.3	654.15	72406.5	122096	3255.62	70161.8	77711.2	854.4	66643.5	85886.8	712	70285.5	58579.8	1330.55	83807.2	104813	929.16	89168.2	109205	2548.07
552	36248.2	27422.7	282.13	74046.8	73250.6	1240.66	58001.2	63384	688.86	34179.8	26117.9	58.74	67352.2	41032.6	513.53	65955	41668	655.93	45727.5	48594.9	465.47	93963.8	90351.9	1191.71	70370.2	128398	2962.81	74931.8	98419.8	1132.97	79356.8	52302.6	318.62	135411	134987	586.51
553	41563.5	49057.7	2360.28	44699.2	29332.6	620.33	118114	183184	2028.31	130612	247288	2516.92	235229	262143	5723.59	48726.8	33262	1100.93	42954.8	48445.4	1064.44	62527.5	54540.1	618.55	69219.8	106282	4795.32	44286.8	19751.8	197.58	92040.8	151482	1730.16	52422.8	39153.8	500.18
554	44832	60467.5	926.49	198932	191037	6238.01	67486.5	92764.7	1212.18	43284.8	50448.8	486.83	56369.2	59688.7	300.82	47906.2	40093.6	1021.72	79584.8	115376	2379.86	96186	74895.3	1056.43	70006.5	100890	2806.17	47769	34146.6	244.75	61424.2	82457.6	592.74	59373.8	45211.1	978.11
555	49133.2	67810	1084.91	44065.5	34374.5	1032.4	108815	156328	2268.61	57001.5	80072.4	1505.88	165532	262143	2637.07	45393.8	31488.2	50.73	76470.8	83462.4	1263.8	54242.2	45519.1	697.76	56020.5	22866.8	720.9	54499.5	44262.4	1003.03	92921.2	127284	1810.26	58474.5	43034.2	399.61
556	154976	230347	2239.24	57269.2	46567.5	670.17	56948.2	64052.4	444.11	67467	66878.2	1472.95	61268.2	70029.6	458.35	262143	262143	4242.63	60493.5	80148.9	898.9	45018.8	42878.4	367.57	94243.5	134463	937.17	175472	93200.8	3671.25	75105	141288	1203.28	40941.8	71868.4	349.77
557	36645	31150	530.44	80541	73913.6	432.54	130131	206337	1618.91	37054.5	28435.5	316.84	61124.2	78049.4	461.02	82469.2	63369.8	1090.25	71993.2	113153	2824.86	71807.2	53879.7	785.87	96650.2	77777.1	964.76	171753	110186	9755.29	63905.2	69900.6	895.34	74085	70301.1	311.5
558	51636.8	62218.1	1370.6	72384	55128.4	258.99	63281.2	74942.4	895.34	55251	45754	637.24	62498.2	83493.6	1533.47	96251.2	95295	962.09	54522	51401.9	714.67	83039.2	54789.3	612.32	54237	75245.9	548.24	79939.5	61355.7	2193.85	67332.8	65447	565.15	74514.8	72647.1	801.89
559	52826.2	56088.7	487.72	46266.8	26345.8	412.07	86242.5	103824	526.88	84157.5	122333	2710.94	69870	106616	988.79	47382	26401.8	383.59	45354	57398.8	473.48	175162	205418	7277.53	175477	209379	3603.61	95100	101723	10621.3	180457	262143	7429.72	39333.8	30256.4	96.12
560	63843	93221.3	2267.72	138115	120361	2074.59	77775	150516	1158.78	55130.2	64163.7	660.38	68602.5	94477.1	640.8	60201.8	53699.9	744.93	41153.2	50015.3	1169.46	77827.5	56438.5	1210.4	64928.2	67425.5	784.09	85677.8	82490.5	1360.81	60144.8	76747.4	104.13	73039.5	80169.4	1472.06
561	45127.5	49760.8	755.61	42847.5	33497.8	339.09	48027.8	54112	376.47	34194.8	29472.3	77.43	92219.2	133650	307.05	80743.5	48433.8	1351.02	43754.2	46546.1	1626.92	42318	33531.6	518.87	101465	136773	2796.38	98581.5	122363	592.74	89718	193366	2002.5	64771.5	63655.5	829.48
562	40118.2	41308.5	349.77	40983	20522.5	518.87	175413	262143	2882.71	45656.2	58454.3	663.05	83316	147691	1086.69	67225.5	65261.9	727.13	49043.2	72028.6	840.16	44226.8	31229.2	234.96	124974	200319	4102.9	47784	39696.7	278.57	61495.5	83034.3	672.84	95230.5	85715.9	1029.73
563	36171.8	39911.2	624.78	56228.2	51796.2	1068.89	58290	49662.9	330.19	42324.8	60965.9	364.9	90947.2	130057	603.42	44751	31660.9	283.91	59359.5	82960.5	331.08	46200	23797.7	483.27	110492	214042	2879.15	95259	103187	2528.49	141076	197252	2284.63	154685	156781	5852.64
564	36288.8	37468.1	559.81	59005.5	48428.5	567.82	59750.2	74037.3	1197.05	36597.8	49708.3	1729.27	129281	126681	1881.46	93002.2	92107	1984.7	54786	98487.4	1606.45	194066	191255	6594.01	145380	227611	2168.04	78156.8	72292	1064.44	106558	169098	2225.89	127282	109094	733.36
565	36567	29791	410.29	48216	37399.6	185.12	120109	195509	3503.93	36369.8	36607.5	383.59	115334	182364	4313.83	72608.2	61696.6	1902.82	33173.2	31403.7	903.35	66141.8	54400.4	216.27	71442.8	95420.5	1025.28	85062.8	68428.5	979.89	88608	153117	407.62	75731.2	62319.6	1334.11
566	58865.2	62240.4	914.92	50628.8	26417.9	260.77	97384.5	127961	1388.4	50157.8	70887.6	451.23	66607.5	88730.3	566.93	45483	26521.1	273.23	32067.8	31470.4	361.34	73857.8	63560.2	1877.01	118106	194281	498.4	80173.5	73876.2	874.87	176286	262143	2344.26	61215.8	60140.9	395.16
567	53750.2	48775.6	1059.99	46437	27414.7	655.04	60922.5	50140.8	449.45	46683	56563.1	412.07	59831.2	78285.3	603.42	83598	58829	1393.74	61260.8	80052.8	801.89	153760	173401	7525.84	125370	161953	4882.54	109853	95737.3	2342.48	94687.5	151435	1026.17	96903.8	113478	1170.35
568	54950.2	42175.3	737.81	44428.5	33312.7	455.68	72824.2	101006	1615.35	46250.2	37866.8	384.48	159003	262143	756.5	42933	37221.6	1436.46	63086.2	92234.3	3293	68637	55417.6	901.57	81267	82468.3	673.73	86379.8	59117.4	645.25	100140	156042	2267.72	60270.8	66701.9	829.48
569	44005.5	56936.9	897.12	53373	47173.6	565.15	66232.5	73294.2	64.08	46157.2	53196.2	845.5	82223.2	120933	2020.3	57368.2	44079	620.33	40571.2	41102.9	406.73	84449.2	100275	6834.31	85935	132784	1435.57	156310	109860	1851.2	90520.5	200716	1128.52	166321	187008	1686.55
570	42279.8	50820.8	658.6	50076	38487.2	590.96	128520	192783	3719.31	119228	174174	3104.32	92963.2	93990.2	275.9	64198.5	63643	1504.99	39427.5	55984.6	572.27	216523	204445	17264.2	62200.5	67457.5	824.14	121841	85853	2755.44	151951	171216	3905.32	69735.8	59323.8	697.76
571	41836.5	52290.2	122.82	45445.5	36054.8	428.09	62391	70058.1	505.52	39943.5	42582.1	291.03	76431	137354	713.78	52704	41832.7	1217.52	52185.8	56060.2	569.6	87702	170755	664.83	84402	107996	165.54	75705	67420.2	877.54	60949.5	82873.2	495.73	43112.2	57982.6	141.51
572	36443.2	42088.1	1031.51	70046.2	51596.9	518.87	81606.8	115576	839.27	51069.8	74565.1	370.24	110655	175949	1139.2	61137.8	40303.6	619.44	55608	74646.1	1061.77	185077	163154	2569.43	85353	141143	942.51	156583	174641	2267.72	119584	140578	1423.11	42299.2	37894.4	1057.32
573	47406	61588	142.4	72402	55951.6	1975.8	88704.8	98048.6	1191.71	100594	108677	2225	97435.5	145349	1140.09	69176.2	48265.6	557.14	88923.8	77860.8	3654.34	69562.5	59338.1	1261.13	64353	109629	283.02	67150.5	69687.9	443.22	62825.2	41651.1	123.71	75378.8	56507.9	1133.86
574	42822	48221.1	417.41	136676	83456.2	1432.9	63566.2	80508.5	394.27	40463.2	22149.4	264.33	131748	127090	1498.76	112218	137741	2364.73	66488.2	80708.8	5170.9	146908	104572	541.12	105153	195140	1909.05	100789	115807	623.89	56094.8	74056	2151.13	96135	89266.1	1068
575	42771.8	52580.3	491.28	47703	37000.9	712	97622.2	133992	1553.05	45643.5	45856.4	464.58	154578	199809	2572.99	86639.2	78637.7	2960.14	31756.5	43085.8	236.74	49724.2	48897.5	3426.5	78660	75138.2	331.08	66689.2	68436.5	1445.36	142964	194781	6051.11	182462	164513	1233.54
576	34122	43766.6	521.54	52708.5	41486.5	356.89	201236	262143	2916.53	38819.2	34482.2	89	65501.2	87788.7	92.56	53932.5	40243.1	412.96	55232.2	75285.1	313.28	92169.8	86173.4	1689.22	60411	72086.4	204.7	22156.5	37057.8	56.96	55869.8	37279.4	381.81	64491.8	75489.8	304.38
577	39325.5	48145.4	376.47	52359	41332.5	1564.62	69954	99526.9	668.39	35526	33430.2	303.49	66855.8	84130.8	556.25	90947.2	132103	1501.43	79436.2	155896	1709.69	56669.2	46820.2	403.17	83307.8	110042	976.33	55749.8	62699.6	1011.93	84367.5	133176	3184.42	44608.5	33626.9	321.29
578	37134.8	29244.5	762.73	55923.8	54287.3	1692.78	70686.8	100584	2320.23	43456.5	75701.6	150.41	84407.2	128620	303.49	39779.2	31894	202.92	71905.5	104628	1411.54	42339	34260.6	782.31	52902.8	78470.4	241.19	137889	141522	542.01	84635.2	118182	1311.86	101290	92772.7	1221.97
579	111489	154977	4410.84	59991.8	58656.3	695.98	53946	62037.4	2516.92	119489	80065.3	1177.47	81060.8	136029	1013.71	58044.8	49496.5	1873.45	65744.2	87315.2	296.37	60236.2	65912.5	173.55	145112	213936	3092.75	86762.2	82212	2275.73	95263.5	175493	1288.72	124672	96104	405.84
580	42000.8	43768.4	949.63	99620.2	70246.8	1085.8	47437.5	37137.9	161.98	33466.5	24943.1	265.22	68232	97426.5	646.14	49236	35519.9	513.53	111187	158513	2073.7	65167.5	56591.5	1495.2	137961	147117	1089.36	49251.8	38806.7	669.28	153524	172284	1789.79	144619	173255	2732.3
581	37002.8	52086.4	973.66	42372	25977.3	453.9	78588.8	110216	437.88	36774	23451.5	349.77	147218	173746	1482.74	127036	90115.2	1249.56	49483.5	46790	515.31	47874.8	45965.8	1030.62	60274.5	73308.4	720.01	148597	94945.2	1699.9	78459.8	78450.8	555.36	103744	83967	3720.2
582	42709.5	48286.1	531.33	45650.2	34463.5	423.64	68100	57231.4	495.73	31536.8	38323.4	442.33	120878	120816	1157.89	59979	25458.4	561.59	40795.5	45055.4	1156.11	112357	102046	1553.05	176111	262143	2066.58	64674.8	61487.4	445.89	91019.2	154621	663.05	141818	192282	1492.53
583	40920	28346.5	586.51	74566.5	49682.5	1327.88	92823	124852	2600.58	70641.8	92263.6	1703.46	60909	57895.4	112.14	52794.8	49157.4	1040.41	43095	52088.1	482.38	110630	90074.2	643.47	77601.8	137059	289.25	77242.5	73679.5	593.63	101453	144641	380.03	71561.2	59525.9	654.15
584	38438.2	45122.1	522.43	38626.5	27442.3	523.32	71515.5	102090	1053.76	56558.2	65730.1	736.92	81934.5	139622	523.32	64326.8	42404.1	561.59	73275.8	108592	1112.5	215353	262143	4378.8	72166.5	97441.6	1593.1	125533	135213	2050.56	69338.2	89213.6	499.29	73352.2	84121.9	680.85
585	66109.5	113695	1868.11	55206.8	44680.7	307.05	65131.5	78422.4	395.16	47223.8	47310.6	695.98	65415	89171.8	550.91	59326.5	40471.9	987.9	40299	32906.9	168.21	207682	170384	1406.2	44124	46426.8	284.8	146590	133744	1499.65	157374	262143	2810.62	69994.5	67136.3	1412.43
586	35499	22903.3	123.71	41202.8	19005.9	210.93	62720.2	87620.5	510.86	54033.8	68933.2	537.56	80011.5	108971	3238.71	74471.2	71816.8	941.62	61305.8	65807.5	1054.65	142729	137036	1402.64	48030	59788.4	184.23	63908.2	60863.5	249.2	136114	113662	1041.3	106751	71532	978.11
587	60531	74760.9	459.24	70856.2	52296.4	746.71	98394.8	108329	2170.71	52960.5	60767.4	1015.49	65431.5	84729.8	1125.85	56440.5	42563.4	658.6	38547	36221.2	430.76	257210	262143	16623.4	133607	262143	508.19	77780.2	58048.5	911.36	76906.5	101543	1879.68	92895	77065.1	2560.53
588	30287.2	25693.4	51.62	76326.8	70801.3	878.43	73674.8	100714	389.82	125083	159541	597.19	71792.2	74984.3	345.32	56514	44876.5	1070.67	41039.2	50734.4	1339.45	117838	101707	1396.41	103660	159715	985.23	107506	52256.3	854.4	144379	135984	1842.3	138694	76438.5	1320.76
589	35264.2	36794.4	179.78	71304	52530.5	542.9	58453.5	79782.3	1002.14	48804	51957.3	1660.74	83905.5	106497	633.68	62871.8	38124.9	396.05	61204.5	70657.1	994.13	66024.8	43969.6	1356.36	132330	216922	1794.24	118815	92161.3	2330.91	215615	262143	13502.2	150286	149322	935.39
590	46941.8	52474.4	1128.52	50207.2	38718.6	497.51	92446.5	116143	2703.82	60764.2	74736	829.48	100839	170091	897.12	74994.8	37179.8	990.57	80040.8	95211.3	1031.51	63486.8	59015.9	574.05	76611	105422	1155.22	87046.5	73878.9	436.99	51035.2	33281.6	142.4	123248	136997	7435.06
591	34183.5	24656.6	302.6	44667.8	31874.5	584.73	68439.8	87469.2	580.28	64968	80118.7	768.96	69703.5	104612	934.5	78942	53035.1	1194.38	77423.2	99241.2	259.88	75165.8	55971.2	1046.64	97296.8	143395	2241.91	129302	124915	726.24	63719.2	113312	496.62	116780	182283	2948.57
592	45406.5	40561.8	791.21	66774	53868.1	1133.86	85734.8	123318	1504.1	50465.2	65512	485.05	198979	262143	2085.27	38469.8	50834.1	133.5	49994.2	55250.3	1073.34	64019.2	49011.4	750.27	64191	87673.9	2205.42	168778	121781	4723.23	198461	261952	8921.36	59738.2	53307.4	582.06
593	31689.8	36618.2	219.83	44510.2	16818.3	381.81	81096.8	111838	1383.06	86692.5	70723	786.76	64189.5	86774.1	562.48	47073	23715.8	247.42	48282	60293.1	183.34	56018.2	47907.8	178	224923	262143	18649.1	94747.5	68345.8	536.67	109733	161590	1040.41	118022	111266	866.86
594	40659.8	43747.9	521.54	56476.5	51448.2	720.01	64301.2	79013.3	1312.75	51519.8	51164.3	1185.48	92953.5	185222	2184.95	134836	101504	1441.8	44769	54107.6	583.84	52125	42040	1573.52	212618	262143	2011.4	56647.5	70207.6	322.18	67707.8	90799.6	638.13	52355.2	46246.2	400.5
595	43204.5	41652	201.14	41902.5	32138.8	528.66	86605.5	135622	953.19	33549.8	27558.8	192.24	59101.5	57162.9	102.35	64038	47364.9	393.38	40714.5	62714.7	591.85	59369.2	49861.4	821.47	50005.5	85601.1	80.1	72464.2	94365.8	1031.51	138068	184160	4287.13	46221.8	28631.3	296.37
596	79868.2	79406.7	1341.23	53093.2	40715.7	689.75	55044.8	48756	416.52	42948.8	50528	890.89	92565	119757	1110.72	97954.5	63239.8	1405.31	62496	129295	1239.77	75794.2	46709.9	850.84	124250	133687	1492.53	75962.2	58636.8	984.34	103782	157488	4447.33	62143.5	51814.9	537.56
597	35502	26046.7	400.5	67325.2	81978.8	976.33	81707.2	123774	1721.26	50064.8	64464.5	1029.73	88464.8	109304	875.76	85459.5	74085.4	1027.95	33519.8	28062.6	307.94	56207.2	43440.9	964.76	50319	58360.9	748.49	88344	78827.3	880.21	151203	170828	2324.68	58772.2	36781.9	169.99
598	36607.5	34835.5	265.22	40303.5	22917.5	291.03	74222.2	103008	1590.43	32894.2	40639.2	241.19	90019.5	137053	2116.42	110131	93285.4	535.78	77808.8	178410	3665.02	84363	75909	906.02	80101.5	107923	1672.31	43245.8	33108.9	721.79	82676.2	124761	855.29	161026	187887	11609.2
599	45652.5	52708.5	441.44	45353.2	23609	144.18	79262.2	114385	765.4	55923	59840.9	593.63	97888.5	157626	1069.78	45184.5	32957.6	630.12	38916	38506.7	1086.69	70502.2	50579.6	1215.74	47589.8	60983.7	349.77	71472.8	72069.5	348.88	68420.2	123988	1623.36	81517.5	107510	1600.22
600	33328.5	28997.1	1035.07	37303.5	31993.7	249.2	79020	115593	609.65	46796.2	45192.4	949.63	55560.8	65997.1	282.13	54363.8	39031.8	639.91	133342	194586	3308.13	110643	101174	3491.47	68905.5	90994.5	2767.01	117129	94236.8	1491.64	58979.2	63263	347.1	171227	170746	1569.96
601	38632.5	47413.9	467.25	46599.8	26972.3	298.15	90115.5	144239	849.06	43738.5	55772.7	832.15	127910	142750	1300.29	94320	90820	990.57	66433.5	96966.4	388.04	65856.8	51284.5	733.36	84619.5	102210	822.36	162134	170271	7758.13	63650.2	69830.3	554.47	55564.5	39332.7	696.87
602	35730	36990.2	919.37	47681.2	39558.7	450.34	88617.8	124402	1452.48	35768.2	34584.5	266.11	53655.8	66970.7	975.44	57575.2	49532.1	1251.34	40620	44204.5	1681.21	45597	37805.4	80.99	105308	138051	316.84	70246.5	64954	682.63	121781	183193	1312.75	73116	88677.8	1713.25
603	66699.8	97331.3	2750.99	59544.8	49091.5	502.85	83319.8	110010	638.13	36189	32836.6	222.5	100594	143692	1064.44	96934.5	79069.4	2451.06	39918.8	50030.5	1718.59	64957.5	71557.8	4902.12	63848.2	79960.3	2341.59	147834	122395	1991.82	131012	159518	1375.05	71177.2	44562.3	705.77
604	34556.2	30700.5	286.58	50522.2	44864	440.55	69716.2	86732.3	396.05	35544.8	34610.3	443.22	64991.2	84699.5	1247.78	91623	83365.4	558.03	64472.2	109477	1062.66	104571	87360.6	4603.97	53704.5	72349	296.37	63793.5	38933.9	446.78	170008	240471	4895	69840.8	53667	966.54
605	41413.5	45872.4	421.86	63130.5	49952.1	1027.06	125837	167254	2506.24	35996.2	26787.2	56.96	89404.5	155623	728.02	68310.8	44303.3	535.78	96972	88519.4	1962.45	84551.2	87382.9	2063.02	123026	204046	2238.35	83326.5	52998.6	2947.68	108108	130996	1141.87	194333	160771	4918.14
606	40254.8	30543.9	357.78	44217	28116.9	544.68	54496.5	71016.7	1046.64	74308.5	91631.7	1138.31	86313	123051	914.92	64684.5	68991	2385.2	93753.8	132661	1499.65	71928	60043.8	2115.53	65268	88801.5	3481.68	170476	228202	20694.3	88679.2	132536	1836.07	98139.8	98186.6	331.97
607	46169.2	64223.3	567.82	50274	31445.5	415.63	66166.5	113976	523.32	40488.8	29102.1	1709.69	62832.8	65290.4	388.04	121105	83852.2	1676.76	39387.8	46125.1	2611.26	42954.8	28164.9	323.96	69281.2	92661.5	569.6	120490	72989.8	6057.34	104671	151686	1153.44	92351.2	71461.7	1932.19
608	41602.5	50485.2	1616.24	40947.8	17352.3	291.92	59701.5	77380.2	628.34	91093.5	161476	1558.39	112643	202309	1434.68	80044.5	82515.5	1539.7	40679.2	40283.2	421.86	71040	100745	3128.35	126981	158778	952.3	114097	132750	2387.87	225082	248064	3399.8	262143	250441	5375.6
609	37959.8	29426.1	135.28	77895	49079.9	677.29	67284	75742.6	184.23	51097.5	61531.9	1086.69	105148	147763	2132.44	57775.5	38344.8	574.94	37475.2	34324.6	159.31	87376.5	68770.3	1502.32	55091.2	72068.6	1986.48	116116	164929	1707.02	149510	232951	2053.23	155659	171290	2157.36
610	66043.5	88231.9	784.98	110817	82866.1	2511.58	74277.8	110161	956.75	41046.8	44266.8	341.76	133869	231336	325.74	92054.2	136259	2164.48	57539.2	68274.6	685.3	39017.2	29131.5	904.24	60668.2	77560.8	432.54	126188	121618	1374.16	58282.5	87462.1	1385.73	66565.5	97375.8	586.51
611	48714	54176.1	467.25	49522.5	38060	835.71	100401	157881	1459.6	36315.8	48469.4	700.43	85104	144402	880.21	58535.2	45244.9	1447.14	40445.2	48178.4	713.78	117940	103912	2194.74	79136.2	112177	1136.53	64986.8	71299.7	1194.38	66199.5	77618.7	855.29	85671.8	76049.6	3311.69
612	39895.5	37872.2	371.13	48693	39564.1	503.74	62368.5	89453.9	358.67	40817.2	41355.6	510.86	205529	262143	3678.37	60269.2	51942.2	723.57	68979	87653.4	758.28	55631.2	34888	958.53	72121.5	85077.8	360.45	165864	142760	2513.36	209712	262143	4495.39	42114	34996.6	1012.82
613	45306.8	44756.3	533.11	52102.5	46991.1	1626.03	54179.2	56644.1	527.77	40983	42590.1	123.71	68867.2	90350.1	534.89	65270.2	50902.7	175.33	51780.8	55764.7	685.3	151312	155160	2904.96	59223	37577.6	404.06	118892	114628	1699.01	108766	138901	1303.85	119644	65429.2	1320.76
614	57069	72543	530.44	47583.8	38035.9	550.02	57765	66788.3	911.36	40214.2	33035.9	626.56	88983	91762.6	2132.44	76052.2	61565.8	7.12	38232	30151.4	121.93	81347.2	60997	1057.32	120152	181361	5782.33	203012	186609	1076.01	150510	194669	4353.88	119380	92273.4	2435.04
615	45108.8	41278.2	537.56	48392.2	38669.6	420.97	75951	113333	309.72	37396.5	35268	398.72	79947.8	127975	939.84	44232	38111.6	422.75	59775.8	95745.3	922.04	58782.8	49543.6	2272.17	149638	146662	1645.61	122975	158125	1055.54	82393.5	128409	1043.08	122842	108324	1440.91
616	47249.2	57935.4	242.08	44561.2	25414.8	281.24	84900.8	97327.7	745.82	37883.2	35132.8	534.89	66996	103893	670.17	57329.2	34821.2	417.41	132370	262143	3712.19	48719.2	50078.5	1788.9	92387.2	145511	1648.28	61108.5	53121.4	1213.07	177430	228022	6912.63	44439	30780.7	882.88
617	52587.8	69444.9	1298.51	48921	41332.5	431.65	96416.2	139929	401.39	34702.5	28310	159.31	61950	69727.9	982.56	88006.5	53390.2	280.35	97085.2	165076	1456.04	76965.8	72289.4	1410.65	89834.2	142909	178	107504	93264.9	4380.58	144538	123681	3576.91	45050.2	44750.1	541.12
618	86160.8	74182.4	1621.58	70809	62040.1	609.65	153443	184306	1035.07	42477.8	41421.5	66.75	60321.8	82477.2	849.06	67998	52646.2	874.87	124785	255313	2085.27	55686.8	49695.8	713.78	54358.5	63836.1	956.75	100746	110968	2841.77	54561.8	34793.7	1886.8	81248.2	94597.2	1086.69
619	39357.8	34665.5	907.8	47070.8	38054.6	509.97	94942.5	112128	878.43	47547	44379	699.54	72624.8	95585.1	656.82	127696	80371.4	1351.91	48804.8	63407.2	250.98	180627	151773	3801.19	117203	129089	652.37	133514	160084	2840.88	50733.8	62087.3	567.82	100587	85561.9	1162.34
620	45375	46570.1	436.1	76768.5	51328.1	980.78	62448	82138.1	194.91	35123.2	29797.2	403.17	106586	146609	247.42	99219.8	87733.5	1069.78	103165	128950	2702.93	134115	110825	2839.99	145096	196208	1367.04	116494	155400	3071.39	137326	157364	1710.58	64965	51830.9	695.98
621	37923.8	41816.6	402.28	64377.8	47200.3	527.77	75095.2	82760.2	2963.7	39682.5	34488.4	245.64	72869.2	104123	679.07	70920	56013.9	717.34	85932.8	155070	3153.27	127926	97097.2	3509.27	56664	81209.8	829.48	68078.2	78485.5	733.36	95471.2	154646	887.33	88254	67922.1	2055.01
622	37184.2	22212.6	515.31	106933	93235.5	2031.87	109692	179011	2405.67	35775.8	32922.9	283.02	53418	52361.4	294.59	72901.5	72907.9	946.07	84429	109074	1078.68	41287.5	32496.6	436.1	54746.2	58566.4	412.96	156091	87522.6	985.23	83636.2	134637	1756.86	126856	88542.5	614.99
623	39111.8	22679	272.34	56297.2	42113.9	847.28	62100.8	85118.7	679.07	67540.5	90977.6	1202.39	61881.8	80770.2	691.53	49662.8	42924.7	457.46	58072.5	85718.6	1577.08	50024.2	39140.4	138.84	81588.8	117943	670.17	58983	48346.6	1032.4	262143	262143	13274.3	82146	68924.3	687.08
624	38844	42969.2	345.32	86777.2	64963.8	782.31	107080	172384	1447.14	49353.8	64318.5	572.27	59932.5	61573.8	623.89	100461	59584.6	1586.87	41367	45150.6	920.26	66122.2	54591.7	5532.24	250924	262143	3407.81	87246	85495.2	460.13	99582.8	86433.2	786.76	104372	92299.2	1674.98
625	39923.2	40061.6	247.42	61169.2	37160.2	468.14	58576.5	58147.3	605.2	84588.8	102556	2088.83	36467.2	39892.5	403.17	78367.5	65470.2	2892.5	69057	80610	930.05	98696.2	116703	1519.23	88680.8	104314	1818.27	143878	209786	1639.38	95820.8	160729	13083.9	57335.2	38971.3	532.22
626	40947.8	47388.1	136.17	132190	107857	1610.01	112351	177773	1100.93	30254.2	28795.9	35.6	61476.8	81571.2	436.99	52312.5	34160	560.7	114229	167893	1585.09	93744.8	60965	1277.15	34083.8	43010.1	495.73	102290	104604	1248.67	98992.5	164590	1555.72	134540	169435	1759.53
627	68109	69683.4	1931.3	47799.8	29376.2	122.82	97551.8	143079	2272.17	35659.5	40123.9	404.06	140634	200596	2265.94	92841.8	70617.9	1177.47	82257.8	101152	3278.76	54800.2	44751.9	425.42	83707.5	140694	1678.54	136335	104958	3133.69	82022.2	97830.6	267	74550.8	56617.3	1528.13
628	37676.2	44904.9	1059.99	66853.5	52212.7	2160.92	65407.5	81678.9	719.12	42681	57797.5	610.54	64551.8	82945.3	443.22	62365.5	62424.6	754.72	55113.8	65375.8	814.35	74324.2	42040	574.05	49064.2	46074.4	689.75	74693.2	72576.8	2411.01	57243	34580.9	582.95	66053.2	57706.7	1686.55
629	46885.5	57366.7	369.35	140830	117508	1602.89	87035.2	180279	1128.52	52592.2	52947.9	198.47	68706	95709.7	825.92	51942.8	44185.8	356	122414	175588	2695.81	52995.8	58783.6	2213.43	114945	85305.6	1678.54	114411	130947	1263.8	50897.2	79145	1229.98	41253	28602.8	275.9
630	28408.5	27825	248.31	85127.2	71132.4	1018.16	70870.5	106041	797.44	41500.5	45196	467.25	57475.5	75103.5	652.37	61677.8	45924.9	682.63	33986.2	39057.6	802.78	81574.5	57137.1	987.9	78999	100761	647.03	60573.8	55180	441.44	262143	262143	2330.02	91206	100794	1369.71
631	34386	24854.1	276.79	48494.2	40993.4	993.24	60330.8	66277.4	164.65	42734.2	36227.4	92.56	136684	157423	577.61	92618.2	67210.1	1689.22	30536.2	32049.8	97.01	99048.8	89801	1011.93	126568	134891	3109.66	192537	242766	6984.72	57181.5	53600.2	389.82	188738	207775	8521.75
632	39067.5	42607	288.36	155613	130772	4477.59	90545.2	107400	339.09	47350.5	58136.6	438.77	80201.2	125841	592.74	124029	109166	3035.79	84681	151304	1870.78	66038.2	52554.5	770.74	143210	158472	4638.68	181748	172329	8681.95	64074	91736.8	272.34	98974.5	93693	1864.55
633	52062.8	59416.4	915.81	106918	87794	1677.65	71886.8	104433	431.65	45831	46884.3	2264.16	180901	262143	2153.8	66278.2	56467.8	638.13	38513.2	61045.1	1449.81	112558	105124	1426.67	50357.2	66107.4	187.79	54085.5	46380.6	235.85	110963	144587	1326.1	254432	236644	2629.95
634	32919.8	22445.8	214.49	45186	18256.6	212.71	59689.5	79424.5	702.21	45033.8	54731.4	881.99	72306.8	103959	529.55	78462	84291	104.13	69333	109875	1637.6	262143	262143	13099	107827	129125	1173.91	133628	111878	1860.1	152074	262143	1132.97	103234	92048.2	5086.35
635	45906.8	54929.9	566.93	46065.8	22436.9	1.78	142690	189103	1542.37	60075.8	78843.3	1231.76	135702	187959	1476.51	41994.8	23169.4	272.34	53929.5	62873.2	898.9	152208	155146	2951.24	126683	161197	1758.64	70403.2	40849.2	1939.31	87690.8	90869.9	808.12	120122	116060	1752.41
636	42009.8	42902.4	227.84	38142	25666.7	397.83	58935	73669.8	1190.82	86615.2	91221.4	1099.15	99568.5	136746	1359.03	65328	51406.4	1170.35	122906	163870	5987.92	208681	216777	2441.27	159933	186832	4801.55	175412	140689	7246.38	63616.5	81273.9	1387.51	103738	76675.3	1383.95
637	40173.8	38862.7	355.11	43812	32119.2	419.19	52912.5	62786.8	418.3	38488.5	34219.6	240.3	58353	78483.8	1051.09	80379.8	56802.5	845.5	61747.5	70275.3	1110.72	59388.8	54341.6	1442.69	78701.2	131024	1467.61	75480	67497.6	607.87	66255.8	78995.5	933.61	156978	163154	4807.78
638	53017.5	57517.1	164.65	41668.5	33218.4	428.98	118561	131447	1177.47	36033	28215.7	90.78	87222.8	132267	846.39	45293.2	38002.1	184.23	39930.8	47218.1	1150.77	71996.2	68229.2	638.13	62643.8	85544.1	569.6	121730	93474.9	820.58	96094.5	125278	944.29	44292.8	59460.9	773.41
639	40164.8	37936.2	88.11	49333.5	30907.9	396.05	90410.2	96850.7	779.64	32813.2	22735	355.11	127204	159233	932.72	52931.2	41403.7	936.28	61407	111436	4363.67	118993	86708.2	4474.03	59664.8	80449.8	2419.02	59720.2	52971.9	727.13	138662	194359	1424.89	80484.8	50874.2	1178.36
640	64417.5	101407	2569.43	65111.2	47490.4	759.17	128389	174684	870.42	76152	94201.2	867.75	62754	70307.3	347.1	61266	38938.4	1055.54	81465.8	96034.6	2983.28	71634	62053.5	1136.53	108140	93680.5	1569.07	75954.8	65194.3	1911.72	165957	262143	5420.1	126458	108002	2700.26
641	37522.5	29467	399.61	55606.5	39806.1	478.82	151643	194154	1623.36	42983.2	63598.5	208.26	54100.5	61110.1	540.23	42813.8	31205.2	512.64	56441.2	64853.4	1084.91	120304	125406	771.63	67472.2	99018.7	671.95	95169.8	85377.7	3237.82	56350.5	60499.5	619.44	74793.8	57098.8	292.81
642	36069	24585.4	373.8	50778	42550.9	1260.24	141426	162217	1355.47	62561.2	52799.2	852.62	66060.8	86273	768.07	69213	48733.7	1077.79	35973.8	37519.7	497.51	150248	155523	5602.55	77036.2	100334	2799.05	262143	262143	4758.83	158230	262143	1143.65	80569.5	71079	431.65
643	62167.5	90606.4	744.93	51973.5	37840.1	424.53	50991.8	60415	505.52	38254.5	33229	437.88	73770.8	117545	1450.7	106073	94829.5	2871.14	70226.2	89185.1	1566.4	114398	127355	6264.71	165190	262143	17391.5	68556	59062.2	158.42	68357.2	99246.6	774.3	43272	51399.3	442.33
644	216076	262143	12473.3	42309.8	32888.2	349.77	135895	130616	3936.47	37621.5	26358.2	91.67	86947.5	120794	1072.45	49803.8	37459.2	376.47	59061	51743.7	205.59	68781	65676.7	873.98	197764	262143	7435.95	69194.2	49801.7	770.74	71385	98601.3	849.95	221898	262143	6763.11
645	38296.5	31937.7	1156.11	76977	69813.4	408.51	86040.8	157285	1924.18	52810.5	77098.9	1593.1	72474	89691.5	364.01	72569.2	56309.4	1070.67	46346.2	53405.3	1491.64	55518	46563.9	318.62	88507.5	76465.2	1213.07	72969	69607.8	1817.38	140506	243541	1755.97	78404.2	83789.9	424.53
646	60754.5	92440.7	1060.88	41786.2	26433.9	389.82	88806.8	133819	1380.39	51037.5	52377.4	521.54	60470.2	55243.2	42.72	66715.5	47482.4	609.65	35469.8	48102.7	828.59	186014	142040	2791.93	52599	59042.6	642.58	118716	94126.4	1446.25	152917	188341	2553.41	111263	91047.9	6836.98
647	42235.5	42670.2	836.6	61719	57054.3	1521.9	64339.5	72575	395.16	38682.8	46779.3	642.58	62972.2	81242.8	460.13	44352	33860.9	817.02	58124.2	78049.4	1084.02	113174	81171.6	1196.16	136177	262143	1678.54	59345.2	58910	1138.31	63610.5	93177.7	504.63	110479	154211	3701.51
648	49608	57772.6	792.99	212336	180750	3248.5	56926.5	58045.8	267.89	70162.5	83952.8	1061.77	81033	97553.8	162.87	49657.5	34580.1	145.07	60917.2	59296.2	266.11	115280	82994.3	4726.79	126428	262143	2710.94	84047.2	65232.6	558.03	76551	119630	603.42	64257	55993.5	1572.63
649	34161	29402	509.97	106572	92414	1912.61	91616.2	129860	862.41	41448.8	25664.9	555.36	65103.8	81173.3	331.08	46020.8	20763.7	375.58	46164	67747.7	189.57	46829.2	33213.9	430.76	75857.2	112270	1611.79	149032	107467	1943.76	87007.5	137930	925.6	73362	50933.8	1181.03
650	39182.2	38028.8	368.46	41120.2	28249.5	402.28	60341.2	64945.1	764.51	48150.8	56199.9	523.32	76197.8	120315	505.52	58531.5	39260.6	687.97	39447	45348.2	839.27	67878	37286.6	1426.67	121660	209284	5093.47	98346.8	111343	1384.84	87648	121569	1078.68	101716	77432.7	1136.53
651	38475	44083.5	308.83	37648.5	26535.3	288.36	56454	65916.1	483.27	35187.8	25163.9	540.23	162851	183774	1988.26	100706	75631.3	836.6	91276.5	117805	2200.97	79294.5	53659	1335	74600.2	112029	964.76	58312.5	42388.9	500.18	57557.2	58369.8	353.33	68826.8	78137.5	1362.59
652	34438.5	34173.3	412.96	52959.8	45131.9	399.61	69378	103752	1197.05	109158	150367	1339.45	58458	65795.9	408.51	102335	79105	2323.79	38895.8	39368.3	1504.99	197201	175179	3067.83	62811.8	53805.8	163.76	75907.5	76289.9	1010.15	91749	135272	1638.49	43671	50713.1	472.59
653	99737.2	77654.3	998.58	68208.8	45567.1	749.38	86272.5	129012	2270.39	43100.2	49484.9	478.82	158921	161846	2233.01	68284.5	49835.6	634.57	52698.8	46313.8	683.52	66378	57305.3	841.05	61682.2	71261.4	1690.11	75447	59091.6	410.29	67357.5	88998.2	1456.04	251620	245086	10032.1
654	50405.2	54033.7	561.59	75000.8	67714.8	269.67	57756	62130.9	426.31	43669.5	63240.7	109.47	107650	130877	739.59	44211.8	41806.9	400.5	58491	70964.1	459.24	91891.5	56508.8	3373.1	105833	202009	3522.62	79602.8	40448.7	927.38	81577.5	119715	1302.07	168459	119669	2573.88
655	36210	33839.6	349.77	77058.8	42710.2	852.62	110750	155562	919.37	36965.2	27426.2	50.73	55473.8	61960.9	242.08	53433	49863.1	638.13	59520	104280	886.44	89950.5	73851.3	2410.12	116297	174300	3061.6	49088.2	40980.1	638.13	90027	138302	813.46	184468	158806	2674.45
656	35525.2	22704.8	432.54	66038.2	47906	1017.27	262143	262143	18573.4	52221.8	68422.3	895.34	72069.8	93575.5	210.93	73403.2	69797.4	1424	119276	121123	1682.99	51685.5	58948.3	1648.28	262143	262143	4043.27	113564	116694	363.12	107311	186726	1521.9	105759	111009	5622.13
657	39180	20835.8	415.63	107041	107095	474.37	86768.2	131511	527.77	42147	32874.8	347.1	66399	90006.6	1741.73	72789	72131.8	2231.23	52649.2	51592.4	668.39	68139	54336.3	679.07	50517.8	59726.1	416.52	120728	124493	1819.16	111807	200278	1205.06	72380.2	81030	746.71
658	33753.8	30400.6	110.36	48329.2	31821.9	2144.9	75672.8	83432.2	1000.36	38495.2	44582.8	406.73	54426.8	41921.7	395.16	191089	177171	6551.29	65325	57850	482.38	127651	126057	1505.88	81842.2	141989	980.78	74139.8	68815.7	453.01	74730.8	110550	987.01	85722	80569	1017.27
659	40239	42772.5	507.3	46337.2	26033.4	318.62	60941.2	71371.8	353.33	34767.8	36954.6	334.64	63169.5	82562.6	533.11	62370.8	54070.2	1513	65624.2	70342.9	1708.8	59448	55627.7	652.37	65625.8	80978.4	269.67	155620	140249	5500.2	49650	68024.5	694.2	63371.2	44742.1	1019.94
660	35610	33792.4	397.83	40128	26417.9	206.48	91241.2	146534	823.25	56880.8	64830.3	574.94	75317.2	129949	761.84	63534	46211.5	759.17	50361.8	69833	3229.81	62840.2	63562.9	424.53	262143	262143	49525.8	262143	262143	4566.59	158764	204034	3070.5	98545.5	103044	2457.29
661	34816.5	24988.5	388.93	60995.2	35922.2	652.37	72921.8	109701	688.86	45921.8	55843.9	441.44	57472.5	60988.1	712.89	170922	166244	2649.53	53861.2	80846.7	646.14	104792	63998.1	2758.11	196045	262143	2793.71	101846	94672.9	541.12	193744	262143	2325.57	90293.2	131827	3589.37
662	36065.2	26457	225.17	59096.2	41097.5	641.69	70687.5	93844.3	1551.27	43103.2	34175.1	491.28	53489.2	68693.8	755.61	87348	79658.6	2751.88	49638	59491.2	609.65	60605.2	43596.6	1121.4	95395.5	133815	2261.49	97978.5	111999	1320.76	68739.8	86154.7	776.97	45706.5	42329.3	225.17
663	62525.2	86785.7	382.7	57036	34985	679.07	71621.2	106545	687.97	56420.2	70205	318.62	181348	216463	4275.56	58769.2	62850	755.61	70447.5	108189	1261.13	35172.8	25979.1	95.23	159340	200274	801.89	82613.2	84343.5	1325.21	85943.2	124386	1068.89	153378	182298	2473.31
664	37823.2	34219.6	411.18	51389.2	35519	1116.95	67429.5	89889.1	605.2	46996.5	58446.3	955.86	84100.5	119062	668.39	72375.8	60304.6	1183.7	62654.2	96996.6	2186.73	38049.8	31007.6	493.95	51987.8	62269.7	566.04	59184	50439	1773.77	80566.5	100311	657.71	122326	142651	3082.96
665	33259.5	35471.8	660.38	75372.8	34459	978.11	83666.2	139859	1114.28	82841.2	114256	3134.58	98875.5	149004	3101.65	89299.5	73992.8	2274.84	51069	58409.8	477.93	65184.8	40525.3	1116.06	96206.2	132080	291.92	98671.5	98042.4	1359.03	122219	104357	442.33	166178	199876	1626.03
666	50700	55397.2	1273.59	56515.5	42434.3	1051.09	60468	54758.1	551.8	36945	31004.9	331.08	95057.2	155126	1221.97	60951.8	62321.4	720.01	67127.2	87284.1	2134.22	43228.5	24497.2	428.98	56494.5	67363.2	527.77	67427.2	68555.8	5476.17	94287.8	147258	2766.12	100887	142505	2160.03
667	43765.5	42913.1	268.78	64771.5	45695.3	874.87	49539.8	59026.6	793.88	36498.8	39929	490.39	86320.5	105097	679.07	53468.2	46107.3	407.62	38692.5	53699	747.6	53759.2	57658.6	1047.53	192916	241047	1814.71	72978	91198.3	1011.04	105228	178192	1089.36	61919.2	51321	574.05
668	43663.5	49374.5	626.56	88898.2	53208.6	1494.31	64512	80981.1	828.59	37150.5	32832.1	497.51	92743.5	130142	660.38	44244	27165.5	771.63	50792.2	64486.7	703.1	113434	144800	829.48	65076	74687.9	2443.94	63738.8	63662.6	617.66	108184	164970	998.58	132699	116097	982.56
669	50695.5	61342.4	603.42	130708	192747	1814.71	58315.5	73614.6	471.7	53087.2	59830.2	1655.4	70375.5	97494.2	381.81	98070.8	71179.5	814.35	52377	59374.6	595.41	96548.2	96508.9	3360.64	194085	262143	16751.6	109342	82160.4	954.97	55388.2	34582.7	331.97	35182.5	41805.1	2030.09
670	32701.5	28147.1	602.53	63944.2	52965.7	493.95	104528	149128	1682.1	52635	57834	591.85	81280.5	118757	593.63	43154.2	30353.4	387.15	6018.75	23798.6	40.05	218372	256340	21262.1	93754.5	135479	2748.32	137787	116399	639.91	173073	150397	1190.82	60504	62245.7	1261.13
671	33868.5	25372.1	117.48	53760	35668.5	496.62	63088.5	57605.2	107.69	57112.5	73590.5	237.63	121966	191211	1009.26	56995.5	39323.8	146.85	52461.8	48301.2	651.48	42782.2	37914.9	651.48	262143	262143	9988.47	132511	127375	1790.68	101184	148161	1258.46	74875.5	77785.1	1115.17
672	36273.8	36552.3	178	52842	27433.4	639.91	54131.2	45076.7	573.16	49508.2	68960.8	662.16	62624.2	80148.9	473.48	47091.8	38998	348.88	42510.8	56744.6	872.2	202033	179037	3682.82	32186.2	55318.8	1191.71	65233.5	62543.9	1433.79	108560	156909	1154.33	106346	95583.3	2612.15
673	38130.8	46581.7	429.87	45408.8	30148.8	464.58	67386.8	95853.9	738.7	43712.2	53432	1148.99	125998	139452	877.54	113512	80710.5	1415.1	43260.8	45703.3	444.11	71069.2	48912.6	738.7	56633.2	71798.1	915.81	114280	106052	2389.65	95310.8	122151	1165.01	106431	105535	1626.03
674	47104.5	59718.1	679.96	64494	47810.8	899.79	83270.2	111587	1124.96	59365.5	66137.7	498.4	59529	70339.4	490.39	100983	100593	995.91	40033.5	25684.5	256.32	54101.2	48400.9	962.09	119856	194409	1300.29	67556.2	74804.5	1262.02	106857	125937	2164.48	74928.8	30451.3	460.13
675	74064	87921.3	905.13	47427.8	48262.9	1013.71	57653.2	59134.3	267	84588	112256	2619.27	66218.2	85857.4	967.43	61546.5	55397.2	699.54	53737.5	49913	1108.05	39660.8	35668.5	671.06	120859	132580	3175.52	45790.5	29967.2	443.22	98628	157704	389.82	117299	96319.4	1642.05
676	114742	145058	1496.09	164880	130375	1865.44	90813	138343	712	57456	64719	956.75	53287.5	59141.4	639.02	70471.5	41542.5	821.47	80016.8	97088.3	1076.01	43291.5	39511.6	317.73	155856	166814	2441.27	46758.8	45450.5	481.49	160627	209481	771.63	47509.5	48124.1	674.62
677	45398.2	51699.2	456.57	44923.5	25105.1	299.04	56907	55976.6	607.87	39432	24888	251.87	78972	90778.2	1268.25	53011.5	37057.8	627.45	75756.8	98743.7	2957.47	132958	106643	2961.92	125915	167090	1586.87	125262	110734	11955.4	53892.8	49828.4	132.61	107126	95853.9	1070.67
678	35449.5	27748.4	341.76	95034.8	120437	1585.98	52586.2	45711.3	288.36	41994.8	50037.6	452.12	56923.5	64733.3	814.35	57570	49965.5	605.2	40369.5	33386.6	586.51	132819	127146	405.84	57597.8	79288.3	518.87	95214	75861.8	661.27	69739.5	97131	181.56	110086	147707	4145.62
679	62155.5	59034.6	1051.98	113832	90719.5	3119.45	82347	111454	809.9	64960.5	67461.1	699.54	92919	139466	1673.2	78367.5	56547.9	1326.99	79114.5	115911	3030.45	70551.8	56069.1	996.8	89817	121974	3270.75	76638.8	67883.9	746.71	133185	166617	3972.07	141532	129385	3865.27
680	148742	224849	4174.99	45249.8	34074.5	363.12	64098	56031.7	355.11	39522.8	35086.5	417.41	94603.5	135028	891.78	72255	55866.2	2803.5	69623.2	118516	1019.05	74556	65375.8	2241.91	98380.5	202562	408.51	136946	131662	460.13	82416.8	96221.5	669.28	101060	96630	1148.1
681	74069.2	70253.9	829.48	58875.8	42903.3	942.51	102554	141902	2156.47	43788	68183.8	522.43	70548.8	116200	873.98	130547	101818	2391.43	90927	110065	1781.78	129727	74779.6	1057.32	84765.8	106893	3301.9	106024	51825.6	885.55	66851.2	77497.6	1386.62	101571	63774.7	1184.59
682	34922.2	35970.2	862.41	63519	51984.9	754.72	118567	160188	397.83	39189	27137.9	279.46	55517.2	81061.2	512.64	80903.2	80371.4	890	43942.5	53507.7	597.19	63115.5	71734.9	825.03	100681	152267	322.18	110013	140245	828.59	66470.2	78289.7	862.41	186500	102273	3850.14
683	47558.2	59779.5	561.59	101326	98527.4	2309.55	78699.8	128282	1205.06	43086	46988.4	517.09	85298.2	122800	710.22	73970.2	60835.1	1239.77	34012.5	44756.3	756.5	47098.5	41878.1	677.29	140141	202390	2993.96	112779	110225	1533.47	48894.8	38496.9	304.38	66239.2	64178.8	587.4
684	39933.8	45283.2	387.15	55808.2	44139.6	231.4	110907	112542	844.61	40794.8	38330.5	161.98	78804.8	104259	1378.61	46062	26410.8	673.73	49325.2	60662.4	1302.07	71448.8	48719.5	693.31	185037	262143	2092.39	40013.2	30263.6	323.96	177842	221674	3951.6	123712	95357.3	3088.3
685	53404.5	70528	1335	72577.5	86335.3	1078.68	67180.5	84768	464.58	39930.8	27227.8	210.93	81610.5	119089	750.27	39591	22381.7	64.97	34668	37856.1	235.85	156791	127911	5639.93	103823	126546	1383.06	50978.2	36555.9	1346.57	52653	34427	101.46	262143	262143	7807.08
686	35706.8	35304.5	241.19	44206.5	24933.3	837.49	117812	125776	3441.63	46317.8	34202.7	109.47	158323	190385	1421.33	47920.5	34249	257.21	55948.5	52225.2	321.29	137204	163824	4005	87399	108441	514.42	103266	108123	5795.68	70221.8	60375.8	477.04	106238	85545	1681.21
687	44855.2	38127.6	905.13	43676.2	36637.7	434.32	63783.8	76241.9	1177.47	51620.2	65394.5	1123.18	75379.5	95902.8	638.13	64301.2	49859.6	1017.27	47930.2	52712	580.28	71642.2	105538	8746.03	61933.5	86338	1374.16	70804.5	60242.3	1131.19	134198	127436	1423.11	65210.2	61903.1	430.76
688	41582.2	55711.3	767.18	58045.5	40161.2	612.32	114313	145324	1490.75	35752.5	32825	19.58	58192.5	48968.7	321.29	69975.8	48740	1414.21	37398.8	36250.6	137.06	53863.5	65544.9	237.63	111348	153385	1606.45	112231	109928	2689.58	77906.2	47385.4	384.48	133178	100016	1613.57
689	51579	59584.6	1135.64	139438	111356	3088.3	65311.5	92035.8	1323.43	57098.2	86358.5	973.66	96275.2	83897.6	1602	78159.8	55270.8	1145.43	45938.2	43671.4	1114.28	62244	60752.3	688.86	63192	85618.9	711.11	262143	224714	8018.01	162204	203652	5536.69	51094.5	34991.2	1141.87
690	48442.5	62745	958.53	57200.2	49813.3	459.24	55057.5	48078.7	377.36	122387	255442	1763.98	78930	110236	1105.38	68503.5	52859.8	1674.09	122398	213989	563.37	41880.8	28291.3	1114.28	90009.8	144186	362.23	56000.2	40130.1	1391.07	59925.8	42583.8	306.16	126248	90966	1508.55
691	51416.2	58226.5	801.89	60202.5	47710.2	938.06	62627.2	87980.9	268.78	43742.2	58946.5	461.02	73036.5	94390.7	679.07	68883	60881.3	1025.28	38180.2	38647.4	539.34	75319.5	78652	1536.14	130364	180787	1875.23	61131	45627.6	289.25	120623	173497	1582.42	92892	77518.1	703.99
692	37121.2	48118.7	1489.86	49881.8	44683.3	443.22	62775.8	81250.8	560.7	46623	61682.3	551.8	114445	159835	1209.51	59976.8	53980.3	861.52	33648.8	38063.5	52.51	146814	127317	2049.67	84768	108717	1538.81	86903.2	50248.5	759.17	70998	90471.2	739.59	73067.2	69167.2	601.64
693	36945.8	36572.8	323.96	55821.8	34682.4	195.8	86323.5	124851	1984.7	99362.2	95657.2	436.99	122805	256976	4408.17	51162	41493.6	230.51	54075.8	65593	827.7	78285.8	69888.1	827.7	78498	137733	273.23	112366	64024.8	708.44	123170	121012	849.95	72467.2	57944.3	708.44
694	47962.5	56153.7	288.36	60404.2	43700.8	220.72	70272	75282.4	787.65	44960.2	56121.6	1221.97	65784	93328.1	566.04	244571	262143	2895.17	34740	35857.2	491.28	99312.8	58504.1	4240.85	74625.8	93414.4	713.78	100354	87178.2	1498.76	118481	177642	5722.7	125244	95021.7	461.02
695	43125.8	42833.9	503.74	124460	86622.8	1785.34	116360	169481	6057.34	43563.8	60993.5	670.17	44131.5	46544.3	348.88	58669.5	53182.8	2543.62	34242.8	26587.9	510.86	58301.2	38929.5	930.94	81659.2	105875	789.43	179956	153987	6422.24	50911.5	65615.2	1450.7	166358	147014	663.05
696	33383.2	31997.3	362.23	45098.2	32639.9	319.51	71871	114478	736.92	43634.2	59288.2	128.16	137990	113916	2456.4	80372.2	76497.3	1856.54	75192.8	99266.1	546.46	68898	59856.1	1862.77	80824.5	104267	919.37	66001.5	55678.4	1542.37	99034.5	162008	1602.89	47826	33016.3	124.6
697	46182.8	44570.3	469.03	59957.2	55444.3	883.77	64777.5	79886.4	372.02	33439.5	43710.6	338.2	60949.5	58510.4	505.52	64269.8	47071.2	376.47	42260.2	49494.7	80.99	237635	224913	3527.07	83775.8	134658	4187.45	95012.2	74955.8	832.15	123154	188918	1581.53	104770	60618.8	918.48
698	38439.8	44717.2	607.87	92164.5	76400.3	938.06	89807.2	142841	392.49	42309	32463.6	423.64	70998	95612.7	1727.49	46836	33788.8	570.49	36891.8	30263.6	460.13	145159	156511	3332.16	184533	262143	1851.2	82604.2	61346.8	279.46	96908.2	144699	945.18	169726	178910	9573.73
699	41445	47254.6	521.54	93756.8	90626.9	3530.63	88134	117971	978.11	49464.8	64998.5	1499.65	134654	175815	1395.52	70495.5	66539.1	681.74	83900.2	94931	1263.8	52570.5	36054.8	521.54	94637.2	128852	371.13	77184	56223.1	813.46	115487	186812	1612.68	81588.8	69748.4	741.37
700	35654.2	20754.8	444.11	50695.5	39670	558.03	148308	262143	2074.59	39620.2	43553.9	404.06	145802	242198	6431.14	43357.5	36295.1	646.14	59073	74977.2	1353.69	40614.8	45719.3	1591.32	95092.5	108177	520.65	262143	262143	5994.15	78719.2	133325	706.66	50815.5	34241	1123.18
701	35992.5	30762.8	465.47	61853.2	46265.8	767.18	91017	156826	1383.95	54345.8	60783.4	414.74	79683	119532	563.37	72105	50367.8	1294.95	72656.2	74109.4	1034.18	74626.5	67475.4	3049.14	71656.5	99292.9	736.92	117889	131418	2789.26	91667.2	102901	241.19	90172.5	100189	606.98
702	59624.2	58342.2	263.44	69547.5	59419.1	630.12	60692.2	72465.6	167.32	43110.8	53727.5	362.23	49931.2	58287.9	569.6	74391.8	76105.7	1049.31	44457.8	48178.4	509.97	36590.2	32230.5	299.04	52344	58154.4	793.88	82363.5	102469	1178.36	59419.5	75526.3	516.2	53109.8	53548.6	379.14
703	36999.8	40956.9	584.73	60630	40672.1	459.24	75315.8	115527	1057.32	90745.5	68806.8	719.12	113652	177834	3090.08	88497.8	59742.1	954.08	44477.2	69135.2	1115.17	85973.2	67245.7	905.13	104707	135229	356.89	136816	144831	1365.26	78867	81377.1	364.01	64353	92220	799.22
704	46476	53269.2	465.47	44696.2	22263.3	291.92	61056	82000.1	447.67	45675	39651.3	428.98	88784.2	117904	664.83	65212.5	54046.1	744.93	46267.5	60242.3	133.5	53460	53021.8	37.38	42813	48697.2	306.16	116038	90997.2	3758.47	80004.8	121620	2206.31	126953	155669	2898.73
705	45613.5	49761.7	113.92	86535.8	69015.9	1332.33	70171.5	113198	385.37	43918.5	52132.6	570.49	101294	128844	401.39	193334	162879	2815.96	53289.8	50973.9	1067.11	41650.5	31960.8	134.39	59517.8	62728.1	159.31	139294	150770	3501.26	97337.2	90092.9	732.47	94924.5	123382	8136.38
706	42005.2	48441.8	246.53	96664.5	65293.1	1297.62	73449	106779	886.44	50957.2	57662.2	408.51	102579	151287	791.21	42970.5	34575.6	935.39	64359.8	72795.8	1385.73	136462	262143	4451.78	49329.8	63367.1	797.44	87905.2	105213	163.76	195087	262143	991.46	64674.8	70601	2077.26
707	34300.5	33804.9	280.35	105496	70879.6	3058.93	51410.2	64239.3	339.98	81234.8	71604.9	475.26	132593	179766	461.02	46512	32753.8	677.29	84708	73888.7	3978.3	107186	165350	5550.04	126957	216518	1519.23	64180.5	77863.4	1106.27	188282	262143	4452.67	81036	110104	875.76
708	53732.2	59867.6	876.65	55704.8	44053.2	527.77	60238.5	81934.3	1202.39	41420.2	50111.4	115.7	59659.5	63750.7	249.2	80291.2	69773.3	1824.5	36757.5	37867.7	441.44	95859.8	86988.6	1165.9	66150.8	94107.7	2539.17	87842.2	86886.2	1561.95	93991.5	171948	969.21	62758.5	46792.6	578.5
709	48754.5	64413.8	954.97	77901.8	66249.8	1459.6	108104	159618	958.53	43306.5	47044.5	291.03	109080	156952	347.1	92418	63919.8	1195.27	154667	262143	3116.78	40530.8	34105.7	658.6	137961	262143	4659.15	44672.2	49506.2	310.61	55019.2	63841.5	463.69	100226	95103.6	1315.42
710	42129.8	47404.1	904.24	68990.2	53517.5	720.9	86541	128352	1756.86	37404	37484.1	500.18	60396.8	67831.4	295.48	72954.8	60223.6	683.52	188062	262143	4749.93	79440.8	79031.1	869.53	103237	130838	834.82	79181.2	74360.4	962.09	53537.2	68922.5	784.09	245110	192487	3895.53
711	43236	41636.9	766.29	41446.5	34154.6	975.44	72206.2	100632	1001.25	37281	31145.5	311.5	91375.5	131536	1719.48	47091	35188.8	967.43	31827.8	33444.4	906.91	89105.2	60772.8	3253.84	70332	113009	867.75	194635	167078	8692.63	121565	186042	1088.47	60467.2	53097.4	677.29
712	38595.8	29233.8	138.84	72375	41940.4	712.89	106865	151103	907.8	41904	55017.1	90.78	105641	139973	2376.3	48669.8	37442.3	445.89	40119	38781.8	581.17	74588.2	62179	6847.66	69106.5	105300	2095.06	106993	136706	2068.36	94607.2	162607	1832.51	90735.8	44442.1	1051.98
713	53356.5	56228.4	519.76	58432.5	43773.8	747.6	82047.8	117141	1399.97	37169.2	30055.3	323.96	71898.8	108539	717.34	42063.8	21093	212.71	55479	57183.4	1049.31	128054	81852.4	374.69	94908	156453	5209.17	93611.2	51404.6	388.93	66223.5	87066.9	1571.74	170888	180067	6114.3
714	34255.5	38466.7	726.24	34638	23720.3	247.42	72543	102328	604.31	50046	57954.1	1063.55	63057.8	75613.5	529.55	83187	60757.6	1442.69	86793	98968.9	947.85	126231	81504.4	1396.41	87270.8	136595	1040.41	73872	71746.5	2490.22	108242	133976	440.55	87878.2	70728.3	316.84
715	42344.2	27954.9	209.15	45059.2	31309.3	534	80675.2	81132.4	862.41	64681.5	52061.4	1701.68	89904.8	119257	1114.28	42414	24629	774.3	35797.5	50864.4	721.79	68135.2	42609.6	1898.37	93633	111081	942.51	84782.2	75116	1103.6	262143	262143	6110.74	67173.8	69577.5	730.69
716	34362.8	35021.5	275.01	128093	86428.8	3329.49	58265.2	75626	764.51	33657	33184.5	912.25	64692.8	90009.3	781.42	47763.8	34530.2	1025.28	41377.5	42107.7	680.85	172288	115948	2991.29	129770	262143	10596.3	82308.8	78931.4	406.73	80928.8	110271	1356.36	134684	107291	1460.49
717	46313.2	59967.3	201.14	97995	65806.6	1072.45	104540	141173	1079.57	45304.5	47078.3	647.03	57372.8	69060.4	1066.22	72047.2	53972.3	682.63	35150.2	33884.1	404.06	61586.2	42331.1	712.89	106575	201748	3994.32	79959	82202.2	849.06	94642.5	211514	2472.42	48173.2	32435.2	385.37
718	213916	262143	8400.71	71874	50598.3	209.15	74312.2	97633.9	823.25	39264.8	30478.9	420.08	70028.2	99716.5	902.46	44908.5	32360.4	1005.7	62048.2	65955.2	1867.22	70713	52695.1	250.09	118312	114160	366.68	42919.5	31005.8	444.11	119252	124251	12137.8	189972	208462	7257.06
719	49383.8	58024.4	460.13	45825	28472.9	652.37	69759.8	104984	720.01	44003.2	57830.4	461.02	82427.2	148831	958.53	117976	117793	2442.16	41753.2	56531	691.53	210099	205902	3463.88	151609	252834	2427.92	46867.5	29542.7	413.85	77490	110083	943.4	110243	96913	4581.72
720	45069	35754.9	807.23	51444	43062.6	1618.02	216557	262143	17800	38636.2	52329.3	331.97	108658	162510	3222.69	44856.8	35616	941.62	85719.8	65723.8	1027.95	115059	105857	1561.95	103645	147086	3645.44	46968.8	41351.2	450.34	130744	262143	2069.25	79256.2	102678	457.46
721	39741	48225.5	725.35	75033.8	73195.4	873.98	69963	93270.2	1126.74	36741	39686	695.09	85630.5	84410.3	681.74	95190	74630.9	2060.35	27137.2	27002.6	383.59	96483	86349.6	3738.89	130422	201725	2356.72	68035.5	57212.8	170.88	122304	181294	2408.34	94901.2	77382.8	995.91
722	34939.5	14653	172.66	47103	36849.6	426.31	81597	118992	1060.88	37400.2	36680.5	655.93	66502.5	130611	837.49	65524.5	67649.8	1909.94	83663.2	75392.8	987.9	262143	262143	13199.6	83192.2	122014	336.42	51810.8	47652.4	784.98	72786	131664	1670.53	169238	120995	7739.44
723	37537.5	43223.7	390.71	46068	22468	230.51	61531.5	94497.5	436.1	32025.8	26097.5	97.01	262143	262143	26067.2	77908.5	60212.9	851.73	30522	45709.5	394.27	61905	52369.4	892.67	197203	181166	1680.32	102180	94362.2	3235.15	73320.8	64748.4	178	105892	111356	2253.48
724	35969.2	38281.6	389.82	49382.2	35440.7	594.52	96762.8	105333	1071.56	46345.5	54140.5	578.5	68700.8	89161.1	595.41	90508.5	82697.9	1166.79	58493.2	71211.6	949.63	79990.5	78466.9	968.32	68731.5	91219.7	1102.71	65393.2	60235.2	624.78	70496.2	98547.9	714.67	66886.5	63611	2245.47
725	36736.5	42642.6	226.06	43513.5	31799.7	663.94	89847.8	112410	1585.98	41734.5	25345.4	499.29	55875.8	69634.5	307.94	126457	141596	867.75	50607.8	57974.6	1815.6	127142	114751	1254.9	92451.8	128867	3151.49	63188.2	56993.8	995.91	118275	138597	1598.44	63420.8	44217	964.76
726	35004.8	23088.4	317.73	52191	45733.5	885.55	60174.8	69601.6	3527.96	42654	58010.2	529.55	54679.5	85516.5	331.08	78125.2	54686.9	1463.16	158206	172315	3477.23	146724	187320	635.46	46263.8	64705.7	436.1	71442	62917.7	1248.67	135126	186387	2323.79	160123	224937	5617.68
727	55232.2	70927.7	764.51	69750.8	46482	543.79	73888.5	122324	608.76	45894	80395.5	632.79	73574.2	116405	6154.35	96048.8	75203.2	1915.28	52439.2	58134.8	960.31	153898	137612	11350.2	73189.5	132808	1076.01	62821.5	61479.4	447.67	82526.2	116076	1733.72	147204	147222	1849.42
728	62224.5	66326.4	1010.15	103904	58541.5	1278.93	181378	262143	2053.23	85201.5	130598	896.23	84046.5	125693	1420.44	68868.8	54341.6	1213.96	38515.5	38100	340.87	45362.2	37925.6	1005.7	122199	166742	1065.33	101466	90630.5	2247.25	64812	83717.9	492.17	158296	215548	3917.78
729	34829.2	27776.9	657.71	54927	37225.1	403.17	69662.2	74938.9	314.17	42312	59194.8	728.91	47358.8	39646.8	237.63	75871.5	78771.2	836.6	35840.2	42006.2	508.19	71353.5	60709.6	973.66	79987.5	60937.4	371.13	53289.8	50725.6	412.07	80142	82447.8	1267.36	93117.8	73344	1263.8
730	86470.5	90784.4	1612.68	73353.8	70929.4	1004.81	64572.8	72792.2	105.91	44596.5	72933.7	1246	73950.8	103619	1013.71	40059.8	34985	469.92	135986	200581	9579.07	98411.2	75857.4	1148.99	124364	210321	1631.37	82407.8	73368.9	506.41	62889.8	65396.3	67.64	69363	72957.8	3907.99
731	36006	32339.9	500.18	48284.2	36943.9	688.86	62664.8	82859.9	576.72	33471	19731.3	213.6	64956	107006	637.24	62595.8	50121.2	377.36	24312.8	33287.8	172.66	123601	78579	3744.23	137385	197485	1498.76	51433.5	41807.8	457.46	104480	167047	1438.24	92891.2	134366	1680.32
732	38187.8	36045.9	478.82	69022.5	64751.1	612.32	126816	150382	1243.33	41607.8	48713.3	903.35	63248.2	89679.1	461.02	51124.5	33731.9	537.56	38322.8	46076.2	512.64	92298.8	69594.4	694.2	49284.8	36440.2	148.63	158991	214602	1356.36	140400	181556	2520.48	100558	84534	3920.45
733	51288	62041.9	2365.62	42570.8	31646.6	463.69	128557	143483	1204.17	36569.2	45806.5	507.3	62181.8	82904.4	717.34	64630.5	44103.1	632.79	40318.5	26031.6	213.6	103683	87242.2	1205.95	83648.2	116632	728.91	43998	42028.5	1743.51	161083	207109	4303.15	72979.5	70779	2183.17
734	55695.8	58215.8	558.03	110852	90318.1	2356.72	55528.5	63565.6	481.49	38153.2	34572.9	1017.27	82044.8	140573	590.96	49304.2	27387.1	721.79	102243	156884	2016.74	113150	93549.7	1130.3	109122	172238	1721.26	71509.5	52373.8	2960.14	86241.8	102242	1011.93	63645	45819.9	768.07
735	63820.5	75355.4	1904.6	50578.5	31500.7	521.54	96763.5	125170	902.46	68977.5	101771	873.98	84231.8	129503	919.37	68768.2	47267.9	693.31	52883.2	57329.3	463.69	58576.5	41617.3	807.23	95194.5	143958	1360.81	158193	187806	4717	129771	127149	1262.02	215883	262143	33894.8
736	55142.2	47432.6	1359.03	108056	72069.5	1212.18	78726	90590.4	1011.93	68524.5	109954	1912.61	66510.8	78027.2	734.25	113610	109319	2257.93	114507	153764	7697.61	199964	168328	2558.75	106910	157279	278.57	79714.5	108732	9234.64	88077.8	164141	641.69	82945.5	77718.4	980.78
737	48356.2	55543.1	455.68	140480	138215	8298.36	75453.8	94137.1	955.86	65500.5	55867.1	901.57	59720.2	53821.9	191.35	85821.8	77975.6	1581.53	79494.8	96867.6	1324.32	65839.5	51916.4	1564.62	85054.5	101819	6068.02	74075.2	50456.8	243.86	150881	262143	3980.08	154564	128192	2047
738	73732.5	128824	1610.9	45122.2	32278.5	398.72	93609	186181	1187.26	48786.8	62239.5	558.03	75423.8	76894.2	479.71	74208	56711.7	407.62	50391.8	54965.5	1477.4	97845	65452.4	869.53	91778.2	62830.4	469.92	91072.5	92325	1736.39	83543.2	121479	503.74	44913.8	43375.9	1824.5
739	53631	53352.8	642.58	44629.5	23201.4	356	72768.8	97970.3	930.94	39731.2	35568	309.72	117056	175922	1618.91	44500.5	27639.8	331.97	66893.2	93883.4	1632.26	92628	70421.2	930.05	141155	226788	1504.1	92729.2	71596.9	1197.94	128673	155759	1176.58	72323.2	57139.8	141.51
740	38906.2	36108.2	352.44	58196.2	38232.6	581.17	126076	165799	1469.39	44846.2	64455.6	1971.35	66477.8	90828.9	731.58	54067.5	35859	420.97	52706.2	54653.1	599.86	109608	55463.9	979.89	143208	217791	2221.44	77698.5	48550.4	1286.94	47275.5	80120.5	1068.89	68011.5	68428.5	414.74
741	98537.2	84844.6	908.69	68085.8	57279.5	952.3	146166	202803	3382	56331.8	70286.9	626.56	72150	94298.2	852.62	62996.2	56390.4	1479.18	54099.8	76884.4	4014.79	131889	158982	2210.76	97160.2	110762	1003.03	80981.2	73031.6	5565.17	88113	113803	779.64	68958	78147.3	9630.69
742	36339	23729.2	521.54	47301	42790.3	535.78	123520	150696	1330.55	67826.2	108578	299.04	155879	262143	1815.6	45063.8	29792.8	15.13	29049	44849.8	749.38	62520.8	63489.9	2204.53	64434.8	107590	2910.3	51883.5	14623.6	311.5	91070.2	169715	1658.07	66930.8	67453.1	420.97
743	42682.5	43711.5	308.83	109264	82602.7	1359.92	165290	262143	2607.7	62844.8	58364.4	1261.13	162630	232472	1821.83	137282	115217	1922.4	44564.2	22851.6	89.89	56371.5	33982	430.76	93237.8	99261.7	316.84	85297.5	66335.3	347.99	101676	154860	2664.66	144881	153622	1719.48
744	39492.8	42699.5	598.97	69276.8	87637.4	2059.46	64264.5	81552.5	461.02	44714.2	22875.7	66.75	116506	187925	1104.49	47513.2	33183.6	342.65	54976.5	58703.5	511.75	43022.2	35859.9	354.22	106161	138903	1910.83	47950.5	30259.1	454.79	122571	182688	2069.25	106676	95335	1131.19
745	131940	123003	1774.66	75711	68238.1	1947.32	64017	63917.1	1255.79	110028	190706	822.36	109714	158847	1182.81	88093.5	63381.3	1197.94	54939	67507.4	272.34	65364.8	48679.4	944.29	74987.2	100806	690.64	149973	109158	3665.91	82395	78314.7	298.15	89023.5	93204.4	1322.54
746	37091.2	30851	385.37	42269.2	27613.1	347.99	99364.5	113194	1780.89	36699	30742.4	560.7	59452.5	62644.4	664.83	124978	99432.6	1639.38	33245.2	28944.6	367.57	50316	37789.4	962.98	73195.5	89000	639.02	44542.5	65715.8	1229.98	80840.2	166610	775.19	52183.5	73420.5	812.57
747	39024	49455.5	420.08	49744.5	43084.9	580.28	75523.5	111498	1063.55	51224.2	66185.7	1066.22	262143	262143	7320.25	64412.2	49297.1	691.53	71727	90276.3	668.39	71613	67415.7	317.73	224466	262143	4992.9	70148.2	57142.4	547.35	118028	125703	751.16	42479.2	56370.8	372.02
748	34886.2	42428.1	581.17	131363	104053	4636.9	5776.5	13346.4	46.28	41923.5	44720.7	141.51	125816	192156	3406.03	70980.8	59649.6	728.02	74694.8	91286.4	712.89	94680.8	105194	7011.42	53081.2	63674.2	113.92	144875	185727	2322.9	49950.8	63652.8	583.84	106168	71180.4	1019.05
749	58128	24700.2	249.2	51597.8	42121	528.66	79826.2	93378.8	475.26	71107.5	112172	1666.08	101152	168584	1279.82	54486.8	32929.1	173.55	38212.5	53708.8	449.45	66910.5	48452.5	691.53	156375	248070	2001.61	79423.5	90748.9	2823.08	66745.5	86695.8	635.46	70104	60148	341.76
750	43956	57931	101.46	59733	42300.8	583.84	54356.2	61398.4	842.83	41522.2	47798.3	467.25	45903.8	30856.3	133.5	70064.2	59204.6	1077.79	32451	29974.3	364.01	64274.2	54282.9	2688.69	87608.2	110408	1914.39	83631	82813.6	936.28	66963	85648.3	622.11	159902	178918	2586.34
751	35643.8	18025.2	309.72	102546	60390.1	797.44	95013	114622	1376.83	42915.8	49976.2	930.05	79185.8	150898	1245.11	86315.2	62825.1	677.29	28600.5	24149.3	208.26	66400.5	68580.7	364.01	132505	157071	1653.62	44735.2	35757.5	584.73	186772	230943	2813.29	92014.5	104721	993.24
752	51395.2	52899.8	168.21	64542.8	49146.7	689.75	85859.2	115390	1247.78	42512.2	55461.2	906.91	55470.8	80362.5	362.23	80918.2	68888.7	1531.69	117177	156076	6518.36	108115	82624	1181.92	74646	113584	964.76	59695.5	42806.3	1978.47	49488.8	68321.7	1060.88	262143	262143	1796.91
753	50485.5	56805.1	917.59	42386.2	24899.5	154.86	69875.2	86884.5	563.37	34147.5	30616	258.99	55187.2	58669.7	267	54614.2	40471.9	1738.17	40670.2	47641.7	372.02	40646.2	24160.8	332.86	73567.5	128213	2323.79	140133	121632	1877.01	65575.5	77524.3	743.15	98923.5	108646	9122.5
754	35808	41145.6	426.31	66856.5	47662.2	1306.52	84842.2	107327	461.91	40119.8	45457.6	650.59	71842.5	67638.2	674.62	76649.2	62288.4	1454.26	57403.5	65394.5	253.65	53121	32520.6	726.24	129086	185860	1588.65	72451.5	64242.9	2309.55	85675.5	94807.2	949.63	36102.8	30062.4	99.68
755	39573.8	32823.2	393.38	146714	121958	2376.3	134901	171938	1302.07	47318.2	53756	478.82	92302.5	140307	637.24	47826	31728.5	286.58	47575.5	61808.7	1189.04	72376.5	48827.2	695.09	95208.8	154438	542.9	67191.8	60821.7	1610.9	103493	142152	1342.12	152912	126335	2425.25
756	138952	202205	2420.8	53210.2	44346.9	966.54	71757.8	113148	1049.31	40804.5	41517.6	461.91	85887	141352	943.4	124141	118725	1860.99	41940.8	47744.1	1169.46	81711.8	67510.9	1495.2	97734	193484	2750.1	124546	139538	5410.31	73368.8	61503.4	306.16	43742.2	32870.4	1273.59
757	58111.5	59411.9	1787.12	123334	99486.9	3556.44	135815	198304	2413.68	39801.8	38235.3	463.69	136190	194885	1010.15	62433	56746.4	3050.03	53787.8	92866.2	1117.84	148966	166342	2408.34	127786	160470	2350.49	157318	156052	1047.53	150182	123358	1326.1	96071.2	79401.4	4077.09
758	34512	32268.7	562.48	72808.5	56475.8	727.13	92024.2	161052	1407.98	38790	36197.2	340.87	116095	149089	3347.29	49896	31883.4	339.09	36604.5	28294	631.9	53860.5	45974.7	617.66	58335.8	65292.2	110.36	103813	103500	1351.02	49814.2	24492.8	166.43	107407	57086.4	359.56
759	43755.8	38467.6	432.54	77156.2	74978	1719.48	166438	222029	3882.18	42962.2	50938.3	1246.89	63443.2	80526.3	666.61	57214.5	49560.5	561.59	67981.5	91126.2	1382.17	89237.2	95198	525.1	90123.8	124618	1585.09	55784.2	41069.1	587.4	64465.5	81298.8	2295.31	116578	130059	1058.21
760	49098.8	68325.3	938.95	46030.5	35257.3	1233.54	64674	77189.7	517.09	37383	43424.9	347.1	105352	163128	1275.37	45493.5	35751.3	478.82	106668	107691	1500.54	154840	175580	6221.99	61664.2	59640.7	321.29	94035.8	82270.7	914.03	63324	76910.2	411.18	46347	37954.1	356.89
761	99713.2	122162	13650.8	75054.8	64415.5	846.39	67221	88212.4	1729.27	48205.5	59406.6	1962.45	54993.8	73191.8	516.2	170768	164386	3468.33	49022.2	51094	543.79	47993.2	38097.3	424.53	124366	262143	2216.1	103298	77686.3	1134.75	83555.2	135363	1134.75	91374	101798	2670.89
762	38682	39607.7	1637.6	48677.2	35761.1	1019.05	59138.2	73498.9	430.76	33372	28855.6	250.98	57309	68555.8	412.96	69981.8	67237.7	770.74	65286	92560	272.34	105556	124345	7244.6	66001.5	75726.5	616.77	80944.5	94510.9	1764.87	105006	216870	517.98	75813.8	68368.9	2852.45
763	46355.2	61288.1	194.91	68618.2	42355.1	538.45	56618.2	69431.6	396.94	52133.2	69692.3	653.26	126068	158417	901.57	62831.2	48779.1	698.65	66216.8	86014	769.85	72322.5	64055.1	286.58	111827	136344	1490.75	72908.2	66629.9	1424.89	123986	179604	1967.79	59147.2	45034	493.95
764	51624	57661.3	425.42	54176.2	31409	453.01	64784.2	76640.6	798.33	48413.2	69280.3	517.98	80935.5	146919	662.16	73884.8	62189.6	1373.27	50758.5	56800.7	1341.23	45746.2	30656	1358.14	64997.2	93503.4	606.09	93903.8	102237	2263.27	150698	183058	1383.95	121023	66256	683.52
765	35755.5	31577.2	209.15	39870.8	32713.7	453.01	130627	192903	2456.4	36293.2	32505.5	372.91	70828.5	85504.1	127.27	49816.5	34565.8	325.74	68191.5	99882.9	1165.01	37650	22414.7	457.46	49053	65858.2	342.65	123858	130423	2108.41	103127	160391	1562.84	44055	29555.1	414.74
766	75706.5	86356.7	953.19	51479.2	33802.2	424.53	177500	262143	7154.71	45969.8	65845.8	497.51	71150.2	87890.2	1359.03	67683.8	60237	933.61	96616.5	184214	1479.18	47211.8	32078.3	608.76	51682.5	60776.3	725.35	152662	132449	2131.55	76384.5	76133.3	381.81	68250	70692.7	701.32
767	57938.2	75920.6	264.33	69300	47910.5	736.03	95428.5	142695	1241.55	51987	72243.1	1116.95	113694	183222	496.62	71449.5	65430.1	3132.8	103420	168173	2328.24	48252.8	39376.3	1019.05	69486.8	97166.6	922.93	183684	224142	11412.5	52545	81762.5	411.18	67723.5	67813.5	693.31
768	50253	58271.9	269.67	135050	123392	1909.94	109496	119400	874.87	39409.5	43054.6	161.09	91083	134145	622.11	150280	122611	1806.7	35226.8	33181	614.99	138967	123979	4279.12	68816.2	96931.7	2767.01	59997.8	70814.6	797.44	229624	262143	7941.47	57248.2	65422.1	1045.75
769	33478.5	29338	240.3	89506.5	81799.9	2394.99	66733.5	108580	108.58	42085.5	31510.4	385.37	63783.8	86613	720.01	58574.2	45002	582.06	39291.8	47960.3	211.82	44995.5	33596.6	408.51	68394	84893.5	1634.93	71125.5	71804.3	151.3	246305	262143	4409.95	87009.8	109003	2914.75
770	29953.5	32200.2	778.75	119217	102651	1254.01	48603.8	61338.8	460.13	63129.8	74236.7	1224.64	115345	196192	1266.47	61624.5	56755.3	1347.46	45303	57374.7	1201.5	80337.8	50657.9	1968.68	59012.2	84371.1	1125.85	44542.5	31563.8	230.51	86568	100773	720.9	124194	106251	893.56
771	61017	77648	858.85	48687.8	35807.4	396.94	116143	172991	1495.2	45332.2	54313.1	942.51	69805.5	94539.4	1118.73	73755.8	51387.7	703.1	33693	33955.3	301.71	37720.5	33733.7	1059.99	188408	262143	8997.01	93190.5	69455.6	825.92	211978	262143	2083.49	53498.2	41482	442.33
772	34112.2	37630.1	362.23	59534.2	45600	699.54	106198	128848	1042.19	35917.5	29098.5	242.97	70501.5	98651.2	919.37	84679.5	51045.1	816.13	95008.5	117813	4111.8	175886	151257	9999.15	97505.2	125779	970.99	63824.2	48070.7	344.43	89102.2	155638	2375.41	51118.5	51381.5	1571.74
773	36750	34076.3	361.34	76104	44766.1	710.22	149249	158551	1378.61	43047	46075.3	117.48	51444.8	34209.8	143.29	66343.5	48820.9	736.92	39609	38941.1	160.2	75219.8	52355.1	682.63	70065	95973.1	451.23	117295	62245.7	6197.96	95216.2	133102	418.3	85034.2	53214.9	4151.85
774	55248.8	69908.6	703.1	52252.5	39974.3	599.86	58151.2	64315	258.99	39534.8	32086.3	434.32	112075	171837	545.57	92622	80104.4	966.54	66555.8	110808	4608.42	76465.5	100228	2249.92	262143	262143	3396.24	62407.5	60029.6	1294.95	59198.2	73729.4	408.51	135967	152840	1933.08
775	64812	90912.6	773.41	89223	69974.5	777.86	61074.8	88770.4	598.97	30662.2	18179.1	111.25	163948	222770	1676.76	44843.2	32745.8	754.72	70361.2	105248	883.77	48448.5	34378.9	2066.58	95148.8	140397	3907.99	119210	196418	704.88	56760.8	58043.1	675.51	63789.8	78907.4	714.67
776	36241.5	38448	395.16	79531.5	62458.4	1457.82	86555.2	138907	363.12	47574.8	66570.2	604.31	65163.8	81783.9	1275.37	71563.5	84757.4	1309.19	60497.2	71805.2	3214.68	52649.2	46973.3	1512.11	86650.5	148869	1742.62	244546	203509	1139.2	262143	262143	5824.16	43417.5	19211.5	20.47
777	33960	29663.7	134.39	62437.5	52199.4	574.94	59397	60506.6	633.68	37939.5	41524.7	575.83	54710.2	64650.5	673.73	45565.5	39022.9	302.6	42513.8	44053.2	461.02	63786.8	44516	1158.78	52508.2	48812.1	506.41	125359	92623.2	1455.15	72253.5	88989.3	1038.63	262143	262143	6333.24
778	46533	40251.1	198.47	90381	52890	912.25	50981.2	58905.5	466.36	87794.2	102308	1079.57	52590	29732.2	211.82	45812.2	33082.2	693.31	78042	95356.4	1360.81	134569	159063	23455.1	55353.8	85404.4	152.19	76255.5	93345.9	870.42	170320	223920	8784.3	111553	152901	3620.52
779	41211	44360.3	689.75	40542	30559	626.56	144948	178146	1460.49	53529.8	73374.3	309.72	60531	85194.4	242.97	48646.5	24912	139.73	123551	107775	2996.63	188437	163718	6292.3	96087.8	110997	1916.17	73403.2	64359.5	781.42	69001.5	86421.7	1355.47	93897	122976	1468.5
780	40462.5	53821.9	960.31	66834.8	58385.8	664.83	61986	73970.6	603.42	42487.5	47939	167.32	60174	77922.2	1185.48	71407.5	61775.8	889.11	41298.8	40346.4	661.27	39244.5	26994.6	388.04	262143	262143	11445.4	55379.2	45526.2	736.03	155031	130614	2938.78	67318.5	67228.8	153.97
781	39126	38770.2	430.76	61161	41310.2	1005.7	73307.2	82401.5	443.22	37278.8	29592.5	222.5	74997.8	112153	549.13	164722	132395	1310.08	37091.2	36819.3	244.75	50814	38763.9	866.86	61187.2	69486.8	1515.67	48061.5	61101.2	681.74	127619	210535	3743.34	52347.8	46409.9	1138.31
782	47509.5	51279.1	1955.33	44473.5	29208.9	609.65	91389.8	128140	764.51	52726.5	53578.9	467.25	95439	167550	378.25	81396.8	62776.1	1200.61	56417.2	71226.7	372.02	81390.8	54143.1	1943.76	125486	208652	1436.46	103175	81111.9	1480.07	93894	125213	1031.51	212045	153027	3069.61
783	54171.8	53602	533.11	46797.8	38898.3	1116.06	43328.2	52243.9	391.6	47612.2	45097.2	127.27	63628.5	39615.7	414.74	64736.2	34290.8	367.57	55440.8	95744.4	998.58	109006	66483.9	1194.38	62301.8	64397.7	509.97	183312	170530	858.85	142975	154813	2100.4	47427.8	43555.7	516.2
784	48828	50078.5	534.89	53385.8	45823.4	436.99	59181	75912.5	679.96	70154.2	93694.8	2144.9	59106	68967	386.26	65967	54743	1204.17	118824	184974	3370.43	138461	95328.8	2584.56	74239.5	101982	793.88	194517	176784	7375.43	102012	122850	997.69	57755.2	40605.4	288.36
785	41600.2	48283.4	757.39	66284.2	50575.1	906.02	67005.8	85190.8	198.47	33919.5	43241.5	378.25	100870	164619	1043.97	65397.8	47687.1	1531.69	76460.2	113430	1076.9	107858	112971	1515.67	87692.2	111870	801	131658	134475	1747.07	87840.8	92759.4	597.19	69425.2	66380.6	348.88
786	37242	44701.1	1486.3	58307.2	53994.5	750.27	166472	262143	1438.24	45028.5	45669.5	825.03	72094.5	105591	605.2	77171.2	81823	2439.49	35407.5	44608.6	589.18	90094.5	68522	3859.04	150902	211397	9937.74	77826.8	61419.8	1594.88	90780	101970	989.68	81615	44023.8	339.09
787	48857.2	53076.9	581.17	69687	49537.4	823.25	94676.2	158964	1246	64738.5	66347.7	216.27	116254	167581	1127.63	47037	37379.1	322.18	28664.2	38561	636.35	64114.5	50884	863.3	106717	157137	321.29	147618	152686	2113.75	167236	262143	1938.42	109888	122303	1436.46
788	60198.8	85178.3	720.01	81714	65237.9	989.68	118616	163157	1221.97	133977	227652	2853.34	74611.5	85040.4	741.37	66617.2	47210.1	1183.7	46706.2	55311.7	2747.43	67629	26593.2	341.76	45931.5	44597.9	818.8	90894.8	130292	2397.66	124922	227535	5211.84	58871.2	50117.7	614.1
789	52122.8	64371.9	482.38	53002.5	37057.8	495.73	48732	48161.5	532.22	34452	37823.2	82.77	121946	160143	6311.88	64839	56432.2	845.5	84111	97820.8	1190.82	45491.2	30534.1	273.23	110826	175865	1837.85	116018	84893.5	2273.95	132388	261852	2289.97	49737	42146.8	196.69
790	45648	45114.1	484.16	131486	113696	2537.39	67242	74904.2	958.53	60944.2	68659	2122.65	177238	252798	1706.13	60912.8	40593.8	1161.45	49860	48642.9	477.93	93734.2	68756.9	824.14	94483.5	229412	4191.01	74625	58164.2	2073.7	135083	170687	2437.71	197168	222965	5841.96
791	36378.8	41258.6	707.55	58479	54115.6	989.68	76062.8	109543	423.64	35724.8	37702.2	564.26	73780.5	144474	1461.38	83739.8	73274.6	1341.23	45157.5	57550.1	614.99	51161.2	40795.8	628.34	117466	262143	6563.75	55824.8	34744.7	665.72	207491	262143	5988.81	97478.2	89317.7	3530.63
792	34562.2	37443.2	742.26	80589	65870.7	818.8	97596	107641	1911.72	36582.8	25205.7	178	128338	142586	975.44	137083	109408	835.71	38451.8	43456.9	980.78	47729.2	35740.6	1243.33	103016	153503	4191.01	72915.8	82996.1	4967.98	101950	148991	3208.45	77961	84478.8	4757.05
793	73691.2	95939.3	337.31	71527.5	41779.3	1262.91	63153	89267	657.71	38223	40005.5	417.41	77981.2	111996	781.42	43021.5	40135.4	149.52	44778	56737.5	1045.75	70035	51244.4	835.71	75926.2	76491	1909.05	181772	168372	959.42	171924	262143	5712.02	71906.2	60931.2	904.24
794	47807.2	56651.2	525.1	124064	96316.7	1335.89	76674	102350	962.09	54172.5	78453.5	1828.06	61383.8	75095.5	533.11	75795	67073.1	1130.3	91415.2	86406.5	1180.14	136636	133115	2350.49	45409.5	64079.1	638.13	58689	51414.4	794.77	78409.5	104835	1046.64	83778	70298.4	619.44
795	46914.8	61519.5	1437.35	35874	21270.1	222.5	85248.8	111252	532.22	40481.2	42305.3	468.14	65688.8	97072.3	959.42	69055.5	39369.1	417.41	62825.2	90266.5	2580.11	89783.2	90387.5	5820.6	102389	135450	308.83	64962	69276.7	1776.44	227635	262143	3503.93	78335.2	81038.1	939.84
796	60069	66906.6	205.59	51282	35394.4	697.76	55471.5	77621.4	379.14	72603.8	124769	969.21	77310.8	96995.8	471.7	67478.2	53891.3	706.66	32997	30858.1	58.74	95880	60330.4	882.88	101526	100298	3342.84	115748	91525.8	2608.59	99815.2	129933	412.96	90590.2	87603.6	3811.87
797	47297.2	64433.3	1877.9	35646	27716.4	273.23	61441.5	74383.5	414.74	37983	32316.8	129.94	82806	133475	536.67	106761	76911.1	2246.36	54284.2	70691.8	874.87	133744	95885.9	1553.05	153547	208024	1759.53	98006.2	118431	2453.73	57959.2	61944.9	876.65	41472	31239	480.6
798	37537.5	43753.3	302.6	41602.5	31955.4	352.44	91159.5	143024	817.02	56937.8	74268.7	1228.2	82318.5	134894	1265.58	49054.5	35534.1	830.37	107162	191806	4132.27	56953.5	43890.3	1110.72	119038	130243	1567.29	53271.8	41341.4	595.41	76119	93754.4	1211.29	83292	81801.7	485.94
799	41317.5	45674.8	572.27	46524	27297.2	784.98	103316	135502	1452.48	43341.8	60195.1	534	91867.5	134135	504.63	73275	57545.6	964.76	93461.2	95749.8	554.47	76991.2	56595.1	667.5	143458	204345	4450.89	42738	48372.4	333.75	119407	125526	2026.53	116584	80559.2	2581
800	36988.5	33173	298.15	46978.5	37621.2	570.49	85272.8	101716	819.69	46513.5	55347.3	471.7	87297	183000	2276.62	65232.8	44120.9	628.34	55130.2	61090.5	258.1	72458.2	48084	990.57	110716	149788	422.75	95781.8	77806.5	1726.6	127490	262143	3319.7	62103	83953.7	1302.07
801	70170	81725.1	1002.14	71436.8	57305.3	122.82	93117	134028	970.99	74745.8	100928	904.24	59472.8	76451.9	204.7	50391	46440.2	440.55	43789.5	57236.8	1080.46	157251	178546	2285.52	234838	262143	7961.94	65338.5	53844.1	2230.34	155880	236797	684.41	157777	191100	2018.52
802	207153	183475	1585.09	108875	81677.1	1294.95	75778.5	112542	547.35	56379	69982.5	1108.05	116596	188640	1143.65	87329.2	64580.2	1148.1	55769.2	103717	605.2	51501.8	36926.1	477.93	233271	262143	9587.97	103742	114810	969.21	138099	189816	1069.78	49509.8	29422.5	202.92
803	36512.2	25534.1	455.68	47961	24466.1	749.38	49587	47065.9	273.23	31290.8	23607.2	208.26	62121.8	77011.7	671.06	127021	98174.1	1791.57	142714	151259	543.79	37802.2	44198.3	1262.02	102077	153631	1997.16	148122	106728	2997.52	91241.2	136032	894.45	67716.8	54035.5	1070.67
804	50501.2	54371.9	453.01	64161.8	70775.5	1545.93	55291.5	53684.8	412.96	43502.2	48765.8	397.83	55398.8	69386.2	396.94	57691.5	45111.4	462.8	33626.2	27607.8	732.47	71073	54312.2	1889.47	71151.8	88519.4	767.18	84641.2	74981.6	818.8	50379.8	44568.5	1109.83	67695.8	80415.1	727.13
805	46086	55775.4	687.08	72933.8	57332.9	1158.78	59115	93422.4	1122.29	85573.5	85940.2	351.55	97773	159689	892.67	61686.8	48713.3	747.6	137960	194310	8219.15	49258.5	79128.1	881.1	188509	262143	2808.84	93057.8	93552.4	2273.06	95572.5	141201	1950.88	55487.2	61257.8	904.24
806	50649.8	39075.4	568.71	67085.2	63716	1159.67	141616	199657	1481.85	33654.8	27509.9	281.24	74142	119236	865.08	52026	47260.8	792.1	80538	84625.6	1916.17	39696	31131.3	578.5	129555	156181	1593.99	101597	120452	877.54	92060.2	150052	854.4	149603	135360	2617.49
807	36631.5	32968.3	153.08	56431.5	43807.6	816.13	191020	218628	3574.24	40995	47372.9	430.76	101621	186662	853.51	51319.5	53783.6	375.58	58731	72151.4	1485.41	61858.5	51082.4	742.26	57639	58208.7	549.13	66386.2	110554	4131.38	106772	143065	3539.53	262143	193228	3009.98
808	39609	45592	376.47	47110.5	39621	409.4	66738	84738.7	753.83	40707.8	50330.4	400.5	163654	262143	2099.51	147452	131859	1452.48	42086.2	39781.2	788.54	109382	113728	1426.67	187751	223661	8270.77	93822.8	89692.4	549.13	90631.5	112756	784.09	73631.2	69670.1	1357.25
809	43942.5	56057.5	522.43	96490.5	70316.2	1485.41	88071	112743	349.77	48774	71074.5	909.58	87144	151964	304.38	87507.8	67526.1	649.7	37766.2	32753.8	299.04	51827.2	43446.2	714.67	74025.8	115724	1067.11	124501	115081	573.16	50772	59941.5	1161.45	73841.2	93455.3	1252.23
810	33950.2	35863.4	323.96	50763.8	31245.2	859.74	63021	88382.3	625.67	41415	52154.9	634.57	65997.8	92321.5	766.29	36419.2	18732.7	135.28	107944	166971	3584.03	49806	32720.8	1346.57	211324	261426	2427.92	87750	87123.9	1008.37	57568.5	111920	339.09	56325	43720.4	899.79
811	38322	41920.8	331.08	86795.2	122127	4221.27	141415	203116	1731.94	41642.2	42060.5	711.11	61455.8	71236.5	80.99	74213.2	60536.9	1730.16	75976.5	110484	1345.68	73884.8	55208.5	2305.99	155229	262143	4677.84	51738.8	50761.1	393.38	128307	151645	1546.82	81652.5	107514	1340.34
812	84679.5	104495	1747.07	42114	22663	529.55	88779	121930	2982.39	39072	55789.6	415.63	77037	114256	807.23	96541.5	97277.9	1148.1	57778.5	60759.4	143.29	53618.2	40677.4	811.68	144556	159587	1321.65	44001	31938.5	690.64	72246	123559	984.34	148480	104789	1465.83
813	36166.5	38881.4	335.53	62163.8	52456.6	1654.51	48177.8	59847.2	1005.7	76182.8	88341.4	722.68	89953.5	105293	1328.77	50616.8	39073.7	2058.57	51750	58412.5	1828.95	152376	126128	7955.71	58066.5	77110.5	702.21	178063	204813	17439.5	63186	48011.1	163.76	126877	81842.6	1833.4
814	39156.8	41954.6	393.38	98443.5	73206.9	1980.25	80704.5	118309	1105.38	56501.2	78375.2	762.73	89718.8	145980	1602	71712.8	55584.1	1538.81	74687.2	106861	3382.89	83364.8	55560.9	569.6	61138.5	72028.6	464.58	107653	116457	9154.54	164212	262143	4692.08	43899.8	46068.2	1112.5
815	63870	83649.3	898.01	44312.2	38467.6	644.36	107450	145734	4666.27	44848.5	29004.2	935.39	78097.5	123192	979	165794	131016	2794.6	30368.2	20605.3	176.22	52942.5	42975.4	205.59	85619.2	122217	1399.08	59492.2	59104	1930.41	94984.5	132808	1164.12	119098	96261.5	462.8
816	34496.2	25240.4	96.12	82173.8	60242.3	1275.37	96104.2	141715	373.8	43773	49799.9	830.37	70278	66135	182.45	51855.8	25572.4	241.19	39538.5	47707.6	426.31	64773	59763.5	148.63	143740	157832	5075.67	82418.2	76745.6	6499.67	59002.5	75776.4	1318.98	50883.8	37782.3	112.14
817	48906.8	59434.2	619.44	84417.8	77832.3	2376.3	92974.5	140769	1478.29	38891.2	37174.4	410.29	97015.5	132954	740.48	105199	85387.5	1302.96	35190	40655.2	683.52	129641	84436.1	4879.87	48411.8	49463.5	1285.16	98090.2	40793.1	1528.13	102034	121498	343.54	114846	95513	2043.44
818	35704.5	28192.5	1132.08	153222	103080	1974.02	64644	78095.7	705.77	58158.8	79318.6	1205.06	96688.5	127283	685.3	63817.5	46417.9	2411.01	35010	25049.9	277.68	62857.5	45689	477.93	137338	230226	360.45	101526	97616.1	1457.82	111232	204832	1818.27	262143	262143	5731.6
819	45894	57578.6	1342.12	66814.5	61880.8	801.89	66459.8	89647.9	644.36	36697.5	30639.1	159.31	56204.2	71381.6	342.65	73038	56116.3	604.31	41723.2	53639.4	147.74	97769.2	113220	525.99	262143	262143	20260.8	71028	76819.5	2161.81	102580	165525	1464.94	100954	77255.6	820.58
820	35601	35248.4	338.2	101756	97274.3	452.12	83660.2	117260	578.5	35839.5	29857.7	208.26	154998	177187	1447.14	75111	86969	1283.38	64109.2	59806.2	2029.2	57198.8	25399.7	476.15	93400.5	166507	1522.79	203725	202430	10275	103946	195095	1665.19	129317	99979.9	2099.51
821	45908.2	46393	453.9	58802.2	57083.7	621.22	167345	241557	1978.47	35931.8	30646.3	400.5	59424.8	76831	547.35	50858.2	42730.7	283.91	52562.2	59368.3	593.63	94073.2	88400.1	7895.19	95247	155115	2095.95	58719.8	44353.1	1076.01	95347.5	136163	1169.46	52760.2	48609.1	1279.82
822	47354.2	53532.6	634.57	43900.5	32030.2	399.61	94443	104907	931.83	66136.5	100739	923.82	61096.5	83755.2	584.73	99549	90989.1	3982.75	52953	66804.3	739.59	51306	46892.3	977.22	165863	241667	1910.83	262143	262143	3074.95	103225	171642	1666.08	228010	215928	4721.45
823	40307.2	45374.9	737.81	35774.2	20933.7	401.39	95171.2	117359	2355.83	49051.5	54593.5	676.4	68817	93426	703.99	68835.8	70706	746.71	36640.5	58182.9	2273.95	89073.8	62415.7	322.18	94781.2	88692.1	683.52	52400.2	52480.6	1550.38	90908.2	118088	1241.55	66063.8	74000.8	679.07
824	40326.8	43059.1	389.82	56634	38732.8	1108.94	81696.8	104079	1478.29	103810	176459	1680.32	84368.2	125468	796.55	79251	67770.8	1692.78	135134	197424	3083.85	194239	130174	13429.2	82659.8	123643	1248.67	58812	38721.2	216.27	96788.2	109017	888.22	81519.8	84922.9	1145.43
825	77344.5	106699	1067.11	38187	25089.1	511.75	76258.5	130593	2582.78	71804.2	99017.8	321.29	72696	111659	1165.01	74525.2	63645.7	831.26	46323	58179.3	2322.01	58800	38477.4	611.43	100385	165218	1718.59	47154	43367	1550.38	157855	202843	2139.56	93513.8	105192	1754.19
826	32064	35783.3	347.1	48260.2	33633.1	985.23	60221.2	57361.4	395.16	57365.2	75375	424.53	128975	147206	2581	73331.2	62666.7	792.99	82668	136021	5660.4	40964.2	27469.8	139.73	98701.5	117201	3746.9	93816.8	80347.4	217.16	83775	111160	2193.85	74989.5	85942	647.92
827	47509.5	53763.1	630.12	125656	136061	7374.54	140223	202230	1584.2	45345	58322.6	2086.16	88526.2	142372	758.28	45084	37065.8	578.5	35250.8	26917.2	191.35	73236.8	54738.6	1480.07	80517.8	97601.9	938.95	118473	137090	3577.8	77342.2	104624	1943.76	91187.2	85057.3	700.43
828	34211.2	23169.4	203.81	92135.2	74135.2	937.17	64524	88911.9	567.82	79463.2	101402	1284.27	63367.5	75424.8	1368.82	69269.2	43602	518.87	56898.8	66895.1	1918.84	138951	103482	1266.47	49218.8	51245.3	104.13	65611.5	51607.5	1200.61	65418.8	90368.8	944.29	158170	171299	1559.28
829	52532.2	62348.9	1035.96	44488.5	30931.9	814.35	112678	170524	1456.93	47979	26575.4	427.2	99943.5	164622	1719.48	57015	40589.3	834.82	55773.8	56133.2	689.75	47015.2	36895.8	811.68	74264.2	80681.2	420.08	61240.5	69381.7	3589.37	151396	201004	1609.12	59671.5	62805.5	627.45
830	69775.5	86887.1	2148.46	53052	37062.3	377.36	137078	170352	387.15	47081.2	63979.4	232.29	66774.8	81873.8	673.73	79828.5	76600.5	2626.39	56761.5	70368.7	266.11	54495.8	58557.6	263.44	81029.2	145262	877.54	67904.2	40548.4	1059.1	123433	115087	1095.59	79626.8	76173.3	254.54
831	68058.8	82075.8	836.6	38622.8	28578.8	838.38	194786	244060	2259.71	57402.8	52283.1	636.35	122586	212520	4798.88	75386.2	63441.9	1114.28	69974.2	67400.6	1699.01	189404	156654	3195.99	85906.5	112999	1144.54	75291.8	73773	1076.01	62918.2	59190.3	162.87	88158.8	99615.9	4205.25
832	38487	36199.9	302.6	65092.5	68519.3	511.75	149359	239171	1501.43	38960.2	37854.4	628.34	87991.5	145361	859.74	58614.8	43414.2	1440.91	36093	48651.8	329.3	97355.2	119464	2263.27	84849.8	210524	3581.36	63042	49191.2	952.3	62341.5	81309.5	675.51	73053.8	64679	771.63
833	117139	262143	4254.2	43716	27592.7	420.08	52045.5	55006.4	322.18	41452.5	56757.1	521.54	55923	90515.7	229.62	117375	141530	1531.69	64401.8	92488.8	758.28	45064.5	35980.9	941.62	48003	116227	727.13	45515.2	35886.6	1137.42	131927	119935	1585.98	112892	85244.2	2825.75
834	111211	154708	2450.17	59790	37078.3	260.77	73254	99361.4	784.09	35679.8	33588.6	347.1	76587	105064	361.34	39865.5	21961.6	174.44	35846.2	35624	1652.73	112785	59890.8	2774.13	122650	159136	1645.61	59633.2	62952.4	822.36	64323.8	77092.7	1331.44	140018	121869	2595.24
835	41409	52099.7	478.82	176780	88339.6	2524.04	173024	185073	1385.73	49877.2	55301	1577.97	90668.2	130957	461.91	39675.8	28788.8	234.96	131350	202176	2818.63	137921	173759	4797.1	117952	210561	1422.22	262143	211633	3460.32	204503	262143	2836.43	102464	91831.1	1585.09
836	61241.2	96971.7	624.78	69652.5	50148.8	744.93	77997.8	105716	808.12	98202.8	139006	6926.87	61630.5	86726.9	613.21	52837.5	35225.3	202.03	61119	84720.9	966.54	55262.2	35053.5	499.29	96071.2	107684	1552.16	124097	105242	4693.86	92334	129672	2823.08	54039.8	64264.2	1492.53
837	32900.2	26142	224.28	53792.2	37119.2	275.9	65916.8	84927.4	3177.3	39724.5	23940.1	449.45	61052.2	103053	544.68	104374	77442.5	1243.33	37026	18298.4	516.2	167856	168291	8566.25	96231.8	144930	2507.13	117795	111948	1899.26	91079.2	127255	2014.07	63051.8	58509.5	971.88
838	143423	227266	2678.01	70127.2	50338.4	688.86	66821.2	82669.4	439.66	53328	89154	1249.56	262143	262143	8648.13	190682	155152	3812.76	57711	60479.9	763.62	35482.5	27541.9	283.91	67218.8	80999.8	1134.75	51420.8	54726.1	1567.29	97983	136543	2276.62	150322	170087	10274.2
839	45857.2	54341.6	91.67	55711.5	38642.9	146.85	66701.2	46145.6	624.78	155269	198604	7633.53	93306	139216	343.54	117783	74945.1	602.53	86724	134343	8245.85	67523.2	53298.5	847.28	102151	152462	372.02	40932.8	52735.2	249.2	80956.5	101557	1382.17	134297	108277	4411.73
840	96309	79701.3	1644.72	80851.5	80553	797.44	69343.5	82774.4	82.77	42222	51898.6	403.17	79866	115425	855.29	45589.5	32256.3	572.27	35411.2	40285	775.19	38286	27612.2	743.15	97637.2	142523	7707.4	56887.5	52877.6	859.74	69694.5	85785.3	496.62	69661.5	90701.7	1039.52
841	42798.8	36602.1	373.8	95079	85738.1	1855.65	69078	91856.9	578.5	34358.2	34404.7	285.69	60965.2	74380	1327.88	84655.5	83984	1106.27	38946.8	57112.2	774.3	180417	186363	3827	106756	147323	624.78	119762	122622	2100.4	85961.2	93239.1	400.5	153753	184447	934.5
842	39196.5	46444.6	193.13	169443	133587	342.65	65205	95037.8	2496.45	33839.2	30858.1	323.07	71845.5	90048.4	928.27	79485	47126.4	839.27	66017.2	109862	271.45	111758	130767	5560.72	110974	139706	3311.69	213063	123075	4002.33	117991	168454	4149.18	93991.5	98196.4	754.72
843	56076	57214.5	2171.6	43812	37195.8	505.52	55821	55715.8	308.83	34353	27691.5	244.75	71727	122112	1508.55	75383.2	44597.9	1575.3	41458.5	33674.9	1359.03	104120	108759	2068.36	153811	171107	1209.51	65164.5	85936.6	2355.83	133387	211934	2392.32	80555.2	53546.8	558.92
844	41964.8	52880.2	459.24	81669.8	58777.4	1019.05	69543	86595.2	1464.94	39988.5	44950.3	242.97	78025.5	155141	752.05	70360.5	50188	863.3	59331.8	64069.3	2912.97	133354	118550	2048.78	45345.8	36593.2	298.15	61075.5	68841.5	303.49	158415	182623	2308.66	105688	88096.6	537.56
845	33311.2	36292.4	731.58	56627.2	46684.1	951.41	65032.5	85459.6	765.4	35134.5	48065.3	376.47	76734	103643	663.05	58555.5	42449.4	1068.89	47129.2	54136.9	461.91	66422.2	60658.8	582.06	213674	262143	1700.79	141770	116311	1369.71	157699	197541	1862.77	89799	75412.4	2238.35
846	33459.8	32104.1	492.17	81874.5	75045.7	978.11	64278	71902.2	691.53	38207.2	30419.3	402.28	78158.2	121724	1335.89	94782	86544.5	1278.04	45771	54999.3	1464.94	42647.2	34281.9	670.17	97065	87764.7	1182.81	50686.5	45891.1	147.74	52101	65655.3	138.84	54300	41280	364.01
847	48501.8	53673.2	615.88	45420	35162.1	960.31	50387.2	38793.3	275.01	40542	34512.4	285.69	143882	142426	1305.63	58961.2	39230.3	469.03	39313.5	41746.3	422.75	102424	104463	7115.55	130550	210640	4444.66	142993	109446	1878.79	122775	262143	14463.4	125419	132676	1066.22
848	41745.8	40130.1	678.18	47367	27966.5	227.84	163388	236175	1585.98	40347.8	35867.9	118.37	59541.8	83095.7	618.55	72017.2	81735.8	1051.98	37522.5	33097.3	1291.39	48594.8	33580.6	614.1	74266.5	99226.1	431.65	67524.8	61546.2	391.6	120910	210492	1344.79	116904	102325	756.5
849	31905.8	25752.2	310.61	37619.2	25029.5	168.21	69347.2	99332.9	1773.77	59833.5	77178.1	1181.03	134223	177349	1171.24	63339.8	45664.1	614.1	42741.8	19055.8	397.83	99870	61630.7	360.45	46446.8	56491.9	1206.84	79037.2	73708	874.87	90148.5	125365	4781.97	43751.2	39470.6	232.29
850	33705	32459.2	879.32	40683.8	32787.6	1099.15	54683.2	62994.2	693.31	43164.8	84371.1	629.23	154546	235119	477.93	74457	59243.7	924.71	54075	76659.3	657.71	37084.5	25405.9	427.2	89229.8	116635	672.84	213296	226511	3320.59	150347	237832	736.92	130526	125730	1010.15
851	43300.5	44570.3	930.94	49216.5	39487.5	469.03	98822.2	147199	289.25	35752.5	30962.2	380.92	158044	208239	1716.81	49368	42555.3	999.47	39279	40343.7	164.65	121202	125211	2958.36	56161.5	75684.7	542.01	44349	46003.2	470.81	135770	125366	2550.74	112354	100227	1854.76
852	47380.5	63541.6	444.11	61161	50221.8	550.02	98109	110320	349.77	55399.5	69493	680.85	67884	85281.6	660.38	55949.2	40802.1	518.87	262143	262143	6669.66	262143	262143	44142.2	101901	138838	210.93	120224	123547	1405.31	104568	131989	915.81	177758	212481	4790.87
853	34454.2	31318.2	461.02	124234	112238	2778.58	105727	139632	1107.16	57271.5	74742.2	1759.53	68685.8	92835	637.24	106774	111620	493.06	32024.2	29884.4	541.12	71727.8	64434.2	800.11	84916.5	106285	393.38	65952	36164.3	621.22	76092.8	109160	1217.52	85854	78721.4	1946.43
854	38154	24136.8	428.09	69403.5	46426	1232.65	77941.5	112344	2228.56	43860.8	49831.1	962.98	56817.8	51337	268.78	77040	51406.4	289.25	83235.8	91653.1	5926.51	51489.8	42726.2	1868.11	90475.5	168030	1136.53	64225.5	56463.4	884.66	79073.2	125875	802.78	76573.5	69216.2	792.99
855	37671.8	33313.6	721.79	77344.5	70245	1166.79	164156	190265	2600.58	40443.8	33051	461.02	193000	262143	1705.24	66336.8	73587	2753.66	81477	78277.3	2016.74	136581	74374.6	5823.27	66021	85536.1	983.45	86301	92504.8	9168.78	108690	159445	2872.03	105874	106983	2029.2
856	45421.5	42436.1	254.54	74058.8	77350.8	1812.93	52099.5	40928.4	212.71	48444	58329.7	454.79	130047	222630	499.29	212435	202137	2620.16	48039	60238.8	916.7	72058.5	49033.7	1962.45	55172.2	58263	512.64	77871.8	76434.1	896.23	80655.8	116457	866.86	262143	262143	16822.8
857	43965.8	49131.6	429.87	68739.8	44546.3	1160.56	123323	215832	1382.17	37344	45730	628.34	59042.2	82183.5	605.2	47723.2	44573	1193.49	114376	162869	1495.2	92130.8	91955.7	1142.76	162626	262143	1228.2	163176	125862	1552.16	184588	262143	3994.32	136994	83880.7	1545.04
858	39210.8	35746.8	283.02	58943.2	38871.6	421.86	58267.5	44019.4	101.46	42064.5	31891.4	940.73	64906.5	32862.4	517.09	164778	117996	1695.45	56830.5	90181	1774.66	45924	46648.5	485.05	120373	213912	2034.54	65517.8	62372.1	892.67	85810.5	101587	627.45	40388.2	57154	337.31
859	78551.2	108067	985.23	39967.5	28836	362.23	163436	234727	1822.72	53640.8	50439.9	585.62	87634.5	149528	712	70373.2	51578.2	739.59	97731.8	126432	4711.66	75141	61287.2	409.4	95498.2	143909	2370.96	72222.8	64635.4	2000.72	129319	262143	2395.88	58158	54755.5	1684.77
860	37926.8	42238.5	157.53	65973	52758.3	847.28	86348.2	132288	898.9	38820.8	31501.5	283.02	95202	146765	1132.08	215710	152324	3322.37	32230.5	37378.2	412.07	63570	50160.4	1323.43	85674	117078	275.01	183078	153426	3946.26	122796	140962	1954.44	60456	48005.7	754.72
861	47139	49887.2	683.52	99330	65765.7	1162.34	65672.2	89965.6	542.01	39248.2	47144.2	352.44	96235.5	117365	2555.19	91815	71375.3	826.81	217810	262143	3356.19	46639.5	51377.9	863.3	85403.2	118552	1496.98	50460.8	43521	466.36	85559.2	161353	1829.84	50196	52292.8	1218.41
862	32080.5	36444.6	415.63	76611.8	90209.5	1343.9	99298.5	141680	1499.65	49476	60406.1	644.36	75678.8	132830	806.34	73774.5	50170.2	1680.32	154556	229829	16182.9	40208.2	21936.7	274.12	55590	64982.5	496.62	262143	262143	4106.46	145076	233037	4303.15	69458.2	83994.6	1004.81
863	38932.5	38820.9	380.03	60246.8	42752.9	534	45253.5	45148.8	694.2	52797	54686.1	1450.7	88864.5	164940	1333.22	71435.2	42890.9	418.3	102269	123649	2662.88	73076.2	58250.5	4153.63	75861	92379.3	636.35	98073.8	77705	3240.49	81658.5	138762	5712.91	81222.8	91937	717.34
864	40091.2	54282	515.31	56076.8	44906.7	502.85	63070.5	84828.6	478.82	63327	76083.4	4772.18	76320	111511	885.55	59547.8	57047.2	1341.23	56896.5	71329	525.1	45135.8	36970.6	432.54	262143	262143	10129.1	74856	81210.7	929.16	135010	151795	1917.95	88410	76323.7	406.73
865	50547.8	48631.4	221.61	49226.2	38327	1108.05	70278	77468.3	735.14	52843.5	69030.2	650.59	144779	243624	2087.94	59193	49108.4	1062.66	34654.5	25482.5	581.17	57334.5	43336.8	466.36	130495	125508	1650.95	62859.8	62446	551.8	159388	138447	1175.69	148455	142671	1604.67
866	49095.8	55343.8	535.78	54871.5	46195.4	751.16	60738	90435.6	582.06	37062	26806.8	402.28	54105.8	68455.2	412.96	64395.8	72776.2	996.8	32672.2	44306	180.67	58096.5	61794.5	1694.56	107296	165940	3371.32	131788	172139	2471.53	81274.5	116351	992.35	221216	262143	4753.49
867	32611.5	36441.1	470.81	57846	44951.2	680.85	71934.8	111831	1216.63	51978	53503.2	587.4	61667.2	90797.8	704.88	52186.5	46196.3	679.07	46335.8	63449.9	740.48	53965.5	49900.5	1354.58	104044	129020	461.91	98005.5	108125	932.72	135302	241290	3013.54	119792	128237	1751.52
868	83395.5	99684.4	1113.39	62125.5	57048.1	1017.27	84995.2	107171	280.35	31711.5	41129.6	212.71	170848	237460	3390.9	90069.8	77482.5	1460.49	78189	90293.2	356	183532	166544	2106.63	83875.5	117203	934.5	115420	126018	3713.97	92305.5	136672	2478.65	114399	159787	1610.9
869	59973	95605.6	1023.5	37462.5	19944	149.52	134475	109436	1488.97	40574.2	51355.7	1903.71	55749.8	73246.1	622.11	66036.8	60595.6	796.55	74528.2	126880	1642.94	72537.8	88970.6	4876.31	54835.5	52890	174.44	75619.5	89226.9	751.16	130295	148504	1590.43	78312.8	66427.8	1652.73
870	52630.5	55705.1	639.02	46005	36880.7	317.73	66111	89403.2	512.64	49700.2	66820.3	1059.99	93723	151126	733.36	40677.8	31312	234.96	52802.2	76469.7	477.04	39881.2	29235.6	186.01	181786	222693	2467.97	80054.2	40438.9	1269.14	76220.2	105435	1335.89	53538.8	53675	145.96
871	72954	76546.2	814.35	50699.2	47348.9	1006.59	135575	169938	655.93	76708.5	108691	1825.39	72753	96795.5	1206.84	52521.8	36809.5	396.94	63432.8	173041	2186.73	95278.5	81521.3	911.36	60228	66911.1	713.78	97309.5	92852.8	1207.73	61557	60585.9	509.97	146943	126431	7087.96
872	32744.2	21502.4	134.39	57226.5	40851	1059.99	61611	89592.7	904.24	42087.8	36580.8	586.51	100339	176246	1028.84	51903.8	41296	274.12	108628	164566	6277.17	118216	107854	1203.28	143674	161174	1346.57	55155	46876.3	267.89	116402	224598	545.57	69666	69978.9	2047
873	46192.5	68773	547.35	50278.5	32971.8	546.46	118609	160425	631.9	97146.8	161179	2378.08	89994.8	141225	2508.02	55295.2	39823.9	939.84	62378.2	83029.9	1175.69	262143	251099	1786.23	72646.5	82564.4	2451.06	70468.5	62170.9	1519.23	71660.2	83692	1485.41	53493.8	34286.4	145.07
874	49044	61509.7	1075.12	59097.8	43901.9	786.76	95532	144533	753.83	43482.8	58767.6	930.05	63066	93009.4	982.56	99258.8	62416.6	2147.57	54366.8	72883.9	885.55	61745.2	62624.8	111.25	112680	143682	3062.49	54616.5	67543	1901.04	100904	111151	977.22	180934	165994	3063.38
875	45822.8	55863.5	664.83	60063.8	46504.3	651.48	76364.2	97952.5	1464.94	47487.8	56232.9	478.82	48846.8	66151.9	806.34	72063	55958.8	979	99228	153739	5650.61	93978	104466	2761.67	127185	197799	3616.96	41200.5	20933.7	90.78	100547	146490	1294.06	90660.8	80448	1052.87
876	60469.5	62044.6	1168.57	51792.8	45730	621.22	91524	124135	849.95	32659.5	43702.6	776.08	67239	82186.2	1239.77	64201.5	55186.2	1337.67	44411.2	52623.9	1081.35	95042.2	73316.4	2733.19	130338	145103	2554.3	174951	141518	4421.52	95276.2	85179.2	636.35	57453	45231.6	1604.67
877	46400.2	57946.1	1202.39	181600	141616	1662.52	187818	249533	1507.66	69702.8	82843	1318.09	88873.5	133932	1108.94	67170	59937.9	688.86	49713.8	63516.6	530.44	161132	157221	1963.34	88406.2	124378	438.77	94020.8	63924.2	1213.07	117976	109844	839.27	120946	113149	1250.45
878	43452.8	31572.8	197.58	60566.2	42104.1	523.32	73229.2	107469	428.98	42858	31975.9	309.72	104802	169911	3359.75	44075.2	33193.4	660.38	87803.2	103816	503.74	225278	146255	2419.91	44708.2	39555.2	308.83	133778	108527	2926.32	93279.8	105647	1346.57	86088	64998.5	570.49
879	51571.5	76665.5	295.48	46465.5	29842.6	383.59	59853.8	63434.8	410.29	37057.5	30664.9	53.4	119335	160752	2263.27	41699.2	33828.9	429.87	51377.2	62634.6	1727.49	96909	94736	1480.07	94337.2	122139	928.27	60138.8	64430.7	409.4	129988	98538.1	443.22	56301	56160.8	229.62
880	31931.2	23407.9	207.37	75906	69619.4	1113.39	129330	179413	1076.9	36624.8	31887.8	156.64	59068.5	68991.9	570.49	48790.5	40827.9	856.18	97908	115900	1514.78	93552.8	117881	392.49	44649	34124.4	36.49	84144.8	52862.4	1558.39	86497.5	117092	1580.64	78939	79000	733.36
881	51528	60714	1644.72	44385.8	32825	456.57	89670.8	135179	929.16	40666.5	49864.9	372.91	213220	262143	3215.57	138386	110145	1502.32	58677.8	74720.8	517.09	71125.5	47461.9	1035.96	76680.8	110728	972.77	100012	93641.4	1535.25	65178.8	76544.4	877.54	76710.8	81398.5	246.53
882	124628	207594	2471.53	64898.2	51126.1	1234.43	54859.5	60641.9	263.44	40242.8	30737	366.68	53429.2	56267.6	563.37	62403	43469.4	553.58	38383.5	35997.8	329.3	73053.8	58538.9	1669.64	152766	186767	1590.43	38967.8	36935.9	706.66	121228	180120	13245	60748.5	47860.6	541.12
883	43752	51965.3	663.05	216550	176367	3396.24	91379.2	112757	1063.55	35278.5	34308.6	293.7	91554	132233	830.37	102393	81245.4	1046.64	53423.2	69072	1417.77	183143	168292	2465.3	57552.8	65269	965.65	78129	110146	2105.74	78627.8	106351	269.67	122816	143220	587.4
884	42000	47065	537.56	116008	99057.9	1516.56	91598.2	110028	2957.47	81585	101950	2898.73	105686	160851	760.95	77041.5	52380.1	979.89	97393.5	119457	1236.21	101013	104492	566.93	158248	131354	1856.54	98733.8	72687.2	4530.1	60488.2	127264	1564.62	40695	31206.1	542.9
885	128073	157672	1529.91	80742	80389.2	924.71	54269.2	69660.3	585.62	34761.8	29545.3	91.67	79392	136117	1001.25	61200	53746.2	981.67	73901.2	124279	5273.25	77470.5	78693.8	3480.79	126341	211097	1055.54	79374	65900	559.81	79737	110049	1192.6	60358.5	47868.6	420.08
886	48324.8	71690.4	748.49	83251.5	57578.6	1022.61	62157.8	74760	761.84	64084.5	93841.6	323.07	55622.2	86412.8	640.8	40155	25853.6	53.4	61793.2	86531.1	2581.89	72155.2	37536.6	2233.9	87227.2	151493	1657.18	91020	59744.8	1388.4	169026	261949	3492.36	114987	109872	492.17
887	41453.2	49180.5	479.71	129903	112863	4385.92	50940.8	124100	423.64	49924.5	58603.8	1035.96	56045.2	59839.1	478.82	78760.5	62846.5	1062.66	79508.2	94233.2	1924.18	123650	146731	2790.15	64218.8	97405.2	631.01	53376.8	80591.3	532.22	168497	152237	5039.18	93851.2	122359	476.15
888	39806.2	40933.8	432.54	53876.2	37462.8	509.97	81064.5	114500	568.71	85642.5	97382.9	1090.25	83259	113632	1154.33	54092.2	41613.7	992.35	36420.8	31181.2	558.03	69140.2	40891.9	1012.82	81572.2	136460	2268.61	55733.2	56428.7	255.43	111398	132865	1360.81	83539.5	75000.3	2170.71
889	40640.2	48704.4	358.67	40533	30709.4	316.84	64738.5	83803.3	347.1	51121.5	47476.2	562.48	67407.8	103038	424.53	50457.8	47033.8	860.63	102297	160007	2076.37	77574.8	78481.1	1296.73	107072	91740.3	1532.58	145247	151160	1447.14	59628.8	81933.4	589.18	103682	83295.1	3103.43
890	37870.5	44124.4	258.1	59755.5	46698.3	609.65	67049.2	95847.7	609.65	38241.8	29012.2	428.09	96297	145496	798.33	63603	57968.4	1258.46	87676.5	107552	9297.83	37289.2	28713.2	513.53	179255	262143	2045.22	126466	86291.7	1383.95	99818.2	169026	5063.21	45590.2	54209.9	837.49
891	44498.2	48367.1	1623.36	55138.5	38989.1	555.36	89024.2	110808	849.06	49491.8	56427.8	142.4	62578.5	87254.7	583.84	63074.2	47278.6	1220.19	87674.2	134109	1911.72	105109	121338	1582.42	210568	262143	4938.61	59617.5	71146.6	263.44	86554.5	127947	1879.68	68400	91394.1	417.41
892	78034.5	107861	2797.27	123705	77612.4	2157.36	108598	157696	4273.78	54492.8	69006.1	578.5	84001.5	132277	1184.59	68133.8	85137.4	673.73	30748.5	37266.1	962.98	73755	63496.2	1382.17	70479.8	79969.2	946.96	92473.5	104828	954.08	86738.2	158101	8589.39	91767	86451	1012.82
893	138141	148780	2414.57	63333	48677.7	1503.21	68064	101003	693.31	60576.8	88489.1	1761.31	55814.2	58612.7	278.57	37029	28022.5	382.7	71316.8	86010.5	1763.98	123695	73506.9	975.44	76670.2	100572	232.29	86034.8	80461.3	1900.15	111712	104750	704.88	89809.5	89946.1	2078.15
894	46479	47571.4	542.01	67664.2	44506.2	770.74	63996	84004.4	527.77	53226.8	80402.6	149.52	91543.5	131560	870.42	59073	44298	2430.59	42325.5	48215.8	589.18	66083.2	59411.1	1229.09	76839	69695.9	922.93	94265.2	73196.3	2026.53	182858	262143	2802.61	67095.8	51052.2	984.34
895	35260.5	34440.3	407.62	53393.2	41195.4	477.93	62930.2	99277.7	178	38895.8	35850.1	433.43	54963.8	67065.9	477.04	171376	154965	3393.57	41654.2	64338.1	865.08	61170.8	43212.2	620.33	118097	194394	1077.79	155742	208445	2695.81	59109.8	37410.3	229.62	110523	73928.7	1302.07
896	52799.2	62520.7	509.08	40421.2	29730.4	275.9	77238.8	111114	881.1	60290.2	74571.3	502.85	95559.8	128069	1625.14	67947	63450.8	657.71	61444.5	76369.1	2605.03	82368.8	54221.5	1024.39	99799.5	124073	4897.67	53277	39196.5	355.11	165455	262143	937.17	93730.5	56454.5	1216.63
897	41271	46701	436.1	54886.5	45469.2	654.15	67629.8	105211	811.68	51500.2	55286.8	511.75	87388.5	138564	1011.93	41399.2	21787.2	187.79	127769	223231	3466.55	81004.5	86985.9	1554.83	158616	262143	11106.3	114710	79121.9	1202.39	154167	171652	1343.9	158844	124559	2122.65
898	53130.8	55701.5	1006.59	81349.5	79110.3	901.57	50536.5	72537.7	291.03	34812.8	31440.1	277.68	119446	124209	718.23	104546	92043.8	2249.92	44549.2	66599.6	448.56	123342	121101	2254.37	69786	98764.2	609.65	72051	77693.4	881.1	117464	262143	1415.99	56671.5	48515.7	1460.49
899	40727.2	44479.5	727.13	72440.2	60821.7	2021.19	58698.8	68445.4	169.99	38326.5	41537.2	162.87	74704.5	72681.9	479.71	70069.5	70530.7	1529.02	45447.8	90197.9	1388.4	87282	80776.4	1206.84	72983.2	108922	2118.2	119150	132734	3909.77	120536	168798	574.05	61626.8	47466.4	546.46
900	75102.8	104206	1941.09	65064	44031	631.01	62181	66719.7	823.25	43992	49945	727.13	81570	120449	905.13	78082.5	58237.1	1617.13	40677	44232.1	491.28	55705.5	43440.9	1949.99	175642	236428	2789.26	60726.8	66554.2	799.22	129119	226894	2394.99	88146.8	83529.2	813.46
901	56781.8	66171.5	727.13	55071.8	44306.9	679.96	57546	78626.2	598.08	37461	30225.3	252.76	64195.5	96539.2	621.22	73956	51208.8	887.33	43977	55882.2	2216.99	73638.8	50246.7	1467.61	55342.5	77774.4	646.14	40011.8	25042.8	301.71	206804	262143	10462.8	145694	107500	1596.66
902	94271.2	101265	1971.35	37779.8	24349.5	336.42	63294	76804.3	468.14	38057.2	48249.6	272.34	76986	105000	1629.59	54492	54111.1	285.69	44290.5	55626.8	516.2	61665	100920	3146.15	262143	262143	6168.59	56411.2	43709.7	614.99	155942	228029	7231.25	146210	162809	2343.37
903	44535	41547.9	933.61	47397.8	29366.4	382.7	70223.2	96333.6	446.78	54421.5	62687.1	1237.1	80949.8	93605.8	572.27	74034.8	62282.2	318.62	61406.2	89132.6	3446.97	117058	131652	672.84	52110	64185	340.87	77814.8	81729.6	4577.27	70028.2	93724.1	517.09	36631.5	39405.6	408.51
904	32790	32258	1008.37	58644.8	50591.2	515.31	104535	167983	1246.89	46179	53117	761.84	53175.8	67635.5	292.81	48399.8	33987.3	361.34	91876.5	100801	1180.14	51764.2	38717.7	649.7	112254	216523	3046.47	97079.2	85395.5	2592.57	47993.2	54090.6	283.02	115787	102802	2634.4
905	71328	74501	849.95	69182.2	55455	857.96	79794	108665	660.38	38795.2	49240.1	537.56	93081	133226	736.92	56731.5	42411.2	352.44	121970	162761	10925.6	142868	141501	6901.95	161512	185895	3551.99	60154.5	53351.1	1676.76	66831.8	49269.5	248.31	40932.8	21283.5	238.52
906	43045.5	49403	436.1	54519.8	38189.9	780.53	262143	262143	9389.5	36675	32547.3	70.31	61136.2	72227.9	149.52	42844.5	28667.8	367.57	119910	246259	1183.7	146724	117205	1632.26	83504.2	119375	1653.62	108548	103141	3318.81	182458	262143	5001.8	107567	58184.6	1124.07
907	43110	48587.8	1529.91	71677.5	54540.1	1367.04	72521.2	108530	1182.81	64176.8	66594.2	845.5	141961	254197	2279.29	114508	130177	2525.82	48261	60467.5	681.74	33509.2	29777.6	737.81	43277.2	49058.6	1112.5	83116.5	69260.7	711.11	136392	187899	468.14	74345.2	63472.1	3263.63
908	48490.5	67708.5	307.05	56711.2	45835	610.54	58128	59577.5	387.15	36168	21121.5	308.83	57048	57371.2	471.7	56257.5	47417.4	1213.07	97068	159859	3317.03	53771.2	47125.5	583.84	129166	226344	2383.42	120863	109392	379.14	85999.5	110135	1007.48	84522.8	100107	3206.67
909	40458	34499.1	416.52	143385	98083.3	1528.13	132769	188739	1255.79	48655.5	63409.8	992.35	87662.2	168804	677.29	122267	97390.9	1173.02	36870.8	32966.5	450.34	108424	96688.7	2475.98	130192	148236	2200.97	105584	88523	348.88	140046	106572	2196.52	187587	123015	2630.84
910	35718	34202.7	463.69	81313.5	66776.7	2438.6	61594.5	82666.8	665.72	53499.8	66375.3	678.18	123528	148261	1344.79	72049.5	60876.9	1306.52	51169.5	57258.1	988.79	66457.5	45918.7	814.35	143978	200484	2632.62	79794.8	61717.1	958.53	112748	158473	359.56	145543	114268	3680.15
911	33094.5	34983.2	289.25	55231.5	45460.3	557.14	73029.8	103779	614.99	41830.5	48377.7	972.77	87163.5	126160	2169.82	42674.2	34669.1	392.49	191890	257910	11451.6	71082	57188.7	1159.67	54114.8	81071.9	635.46	194073	188485	6507.68	80237.2	120284	1109.83	93930	77655.2	1777.33
912	69820.5	127192	1606.45	47440.5	42724.4	480.6	61572	72450.4	1304.74	50665.5	55506.6	1150.77	75376.5	111821	552.69	35225.2	32283.9	406.73	40098	58306.6	288.36	107404	88336.9	1138.31	68277	108605	950.52	88659	93029	811.68	129142	135169	2548.07	57706.5	54797.3	525.99
913	38269.5	43148.1	329.3	94677.8	66818.5	912.25	59382	106320	604.31	56212.5	63405.4	905.13	96054.8	147237	1884.13	41956.5	31160.7	1063.55	38673	43520.1	395.16	204688	131733	4608.42	63486.8	76103	167.32	224974	239274	3834.12	113431	174463	3034.01	64404.8	58526.4	876.65
914	36243	34584.5	307.94	224648	187167	4021.02	81438.8	95153.5	765.4	34460.2	39003.4	350.66	61357.5	82211.1	543.79	52482	35141.6	833.04	127636	157421	2448.39	68742	57953.2	1204.17	68436	74096.1	725.35	146872	166693	7719.86	97429.5	196200	1325.21	145581	140340	7596.15
915	38783.2	29621	306.16	70118.2	54238.4	712	97084.5	143472	2745.65	38328.8	37268.8	433.43	99841.5	164728	759.17	97236.8	73701.8	1138.31	50295	60682	326.63	94543.5	63755.1	1169.46	80217	117410	954.08	73788.8	70041.2	2202.75	94044	156804	421.86	83211	91840.9	754.72
916	37507.5	38931.3	229.62	94810.5	76206.2	3415.82	98389.5	140416	4682.29	103546	172916	1809.37	128497	204032	558.92	64076.2	44880	152.19	124532	113556	1925.96	96788.2	116169	3810.09	200459	172567	1450.7	162367	251324	2765.23	76503.8	69243.8	448.56	49653	41762.4	277.68
917	39735.8	34055.8	407.62	109394	116746	1626.92	85135.5	121090	696.87	61351.5	69876.6	1649.17	86654.2	129011	563.37	52599	39221.4	1376.83	70201.5	73058.3	1335.89	68193	41183.9	626.56	33703.5	55429.2	465.47	65061.8	50599.2	188.68	72692.2	105152	738.7	54739.5	128638	901.57
918	35339.2	30443.3	408.51	95339.2	70474.6	2886.27	127257	157851	4252.42	45856.5	63230.1	518.87	66886.5	58071.6	169.1	45550.5	24799	635.46	93198	85114.3	1768.43	62880	55718.4	1072.45	88598.2	158520	1039.52	41152.5	32978.1	1270.92	165850	158953	1519.23	112835	95715.9	8849.27
919	54927.8	66473.2	1152.55	56748.8	54057.7	880.21	92362.5	129035	1374.16	54768.8	59384.4	463.69	92430.8	142858	706.66	58163.2	41912.8	631.01	63697.5	75146.3	277.68	52902	35316.1	650.59	51348.8	59777.7	301.71	71085.8	69905.9	2280.18	205360	262143	9575.51	100906	69181.5	477.93
920	69438	91918.3	2510.69	67635	42641.7	325.74	60184.5	97626.8	1170.35	62124	101079	587.4	135756	262143	1824.5	127234	178579	3353.52	90741.8	101201	679.07	49575	35980	275.9	50715	45981.8	1863.66	148488	155974	10974.6	81300	97701.5	590.96	74349.8	70807.5	797.44
921	38172.8	30169.2	1045.75	79061.2	93567.5	2055.01	86145.8	125942	1172.13	85293.8	113246	3122.12	96897	224022	1610.01	55224.8	47381.8	861.52	50166	75029.7	765.4	96713.2	67033	2408.34	82379.2	109810	2027.42	96740.2	78582.5	4235.51	54036	75401.7	875.76	63540.8	49264.2	707.55
922	43514.2	50061.6	1177.47	63024.8	51183	609.65	61875	71918.2	504.63	95977.5	100130	1844.97	66803.2	141737	312.39	89582.2	70562.8	209.15	56979	71910.2	1320.76	60693.8	69262.5	960.31	37158.8	51086	127.27	65352	46304	699.54	110978	140865	601.64	102808	108724	3259.18
923	44728.5	46540.8	584.73	53711.2	40559.1	460.13	118119	175944	1221.97	43935.8	51989.3	708.44	189872	230507	2291.75	77819.2	63763.2	1099.15	64103.2	70337.6	752.05	80681.2	63037.8	1512.11	159678	222588	576.72	74986.5	80310	755.61	114986	99773.4	339.09	73480.5	79499.2	705.77
924	57902.2	66183.1	754.72	53052.8	33553.9	1780.89	89577.8	120867	918.48	54582	58885.1	591.85	45241.5	45678.4	408.51	63391.5	50903.6	962.09	36989.2	32388	295.48	137356	117784	6868.13	201688	252518	4801.55	84243.8	81343.3	504.63	183388	243664	10725.4	214219	250053	7743
925	34443	27260.7	225.17	79231.5	90731.9	1132.97	51862.5	47433.4	399.61	140522	176532	2502.68	75378.8	116355	1663.41	56847.8	44693.1	1610.01	39383.2	39727.8	886.44	45414	46840.7	833.04	57542.2	70820.9	663.05	64865.2	70290.4	349.77	134964	262143	6752.43	108724	134307	1638.49
926	83826	113321	1292.28	45360	23972.2	345.32	108702	173161	2828.42	37917.8	54605.1	280.35	90627	158236	2099.51	69477	73415.2	207.37	115311	127371	583.84	58676.2	51695.6	1175.69	140115	193894	431.65	64870.5	50777.2	283.91	80833.5	120207	820.58	49089.8	40996.1	577.61
927	56033.2	57321.3	460.13	72813	64500.1	1477.4	57257.2	59404.8	356	38754.8	41425.9	781.42	56936.2	67621.3	309.72	44568.8	29268.5	277.68	60498.8	128971	1808.48	124849	123261	5080.12	186310	262143	1112.5	160092	111002	2677.12	100522	181496	986.12	72725.2	89404.9	842.83
928	33786.8	37348.8	474.37	66678	45439.8	720.01	77478	116243	1199.72	36301.5	39711.8	313.28	93371.2	156883	412.96	42723.8	25470	406.73	44001.8	56515.9	436.1	144731	166332	2357.61	75993	119274	1430.23	71106.8	52773.4	773.41	165765	191875	3743.34	48042.8	41174.1	982.56
929	34871.2	44354	361.34	111928	98945.8	2378.97	77125.5	122518	879.32	45639	58074.3	261.66	74742	88167	746.71	89828.2	64840.1	2761.67	55578	57520.7	956.75	40385.2	25472.7	327.52	125439	79970.1	2151.13	64602	63531.8	2194.74	130933	261856	448.56	106447	78359.2	4951.07
930	30664.5	21905.6	228.73	41740.5	27476.1	273.23	77871	103690	622.11	41263.5	41945.7	135.28	77860.5	108980	1315.42	57309	56860.3	663.05	49866	66503.5	605.2	49926.8	49795.5	1154.33	177665	196619	4458.01	144041	143202	582.06	197444	162537	3306.35	94581.8	58837.9	1192.6
931	33672	25903.4	364.9	72302.2	35048.2	648.81	90147.8	138805	3781.61	45797.2	50137.3	114.81	83056.5	153491	2216.1	48467.2	25255.5	838.38	46921.5	54992.2	352.44	79153.5	63125	530.44	81750	132830	1821.83	77514.8	61040.6	1472.06	82894.5	217971	440.55	56926.5	53440.9	362.23
932	70473	84957.6	1484.52	77223.8	49722.5	180.67	80715	111118	1308.3	34264.5	28303.8	33.82	88133.2	230338	2084.38	79582.5	54988.6	2073.7	85374	136839	537.56	129805	116173	959.42	82983.8	125291	1841.41	62009.2	55817.2	811.68	132643	174417	2734.08	84614.2	88555	1102.71
933	91270.5	109300	3967.62	44397	25121.1	500.18	53958.8	74128.1	469.92	36493.5	33321.6	340.87	66175.5	126485	801	92046.8	84405.8	3965.84	87985.5	127889	541.12	74853.8	36894.1	706.66	162815	198982	9193.7	74740.5	86726	1197.94	110232	148230	2053.23	113494	102296	1166.79
934	33780.8	50560.9	365.79	67314.8	59995.8	2330.91	75039.8	101510	937.17	41559	50835	1002.14	63774	97751.4	461.91	70779	55650.8	728.91	40674.8	54885.4	866.86	158696	132906	4688.52	127900	176554	1439.13	53026.5	46471.3	1065.33	200834	230406	4227.5	91382.2	52338.2	299.04
935	46986.8	44544.5	556.25	111213	88639.5	1268.25	187079	219944	3603.61	57732	74676.3	549.13	119584	190105	1063.55	52387.5	35523.5	456.57	40776.8	59287.3	559.81	85956	76260.5	2995.74	68205	91122.6	175.33	86083.5	80876.1	744.93	67857	132837	949.63	73700.2	38483.6	1561.06
936	37594.5	35578.6	275.01	63918.8	54087.1	917.59	107332	158225	928.27	42042	24933.3	307.94	191918	262143	3102.54	40127.2	27085.4	271.45	55300.5	52163.8	1109.83	97160.2	63432.1	1725.71	139742	204397	1571.74	124480	134578	388.93	93543.8	147234	1276.26	66491.2	65006.5	676.4
937	134714	158670	2196.52	43056.8	22996.7	222.5	65956.5	80190.8	983.45	92163	108658	1051.98	111707	180182	320.4	69605.2	43949.1	664.83	32596.5	39530.2	98.79	48610.5	39581	1222.86	110178	166268	1613.57	136156	96960.2	1092.03	70636.5	78175.8	467.25	41773.5	32046.2	240.3
938	39616.5	39253.4	715.56	42789	32104.1	687.08	76184.2	113267	859.74	32067.8	36280	364.01	134469	188359	1255.79	60295.5	47262.6	91.67	59547.8	102724	783.2	59377.5	43494.3	1792.46	98691.8	166554	5971.01	93896.2	98035.3	1148.99	70380	108946	664.83	75813	91925.4	3516.39
939	38303.2	20093.5	537.56	45723.8	40145.2	760.06	73090.5	113044	739.59	54060.8	60101.7	875.76	55724.2	76828.4	335.53	41968.5	36275.5	1401.75	57603.8	73731.2	784.09	81177.8	76282.8	1678.54	86616	124261	2274.84	75354	72877.6	2801.72	61485.8	86524	1634.93	151822	149383	2614.82
940	53817	65576.1	638.13	53730	37557.1	813.46	56792.2	68191.8	381.81	40337.2	42421.8	444.11	86764.5	131484	776.08	50147.2	38938.4	-12.46	57633	57730.7	655.93	111954	67718.3	1367.93	85677	110511	780.53	166117	116852	4001.44	101701	146166	2045.22	131224	99300.9	1747.96
941	38487.8	42905.1	475.26	57537.8	46200.8	581.17	50001	47715.6	1031.51	78682.5	103102	1305.63	59957.2	79867.7	696.87	45705	27962.9	265.22	144040	197766	1823.61	68097	41046.8	1626.92	51340.5	65010.9	2874.7	166462	182783	1821.83	71664	49557.9	275.01	71832	39716.2	1419.55
942	46225.5	46709	234.96	50161.5	40987.2	509.97	113767	141286	1183.7	37040.2	40220	329.3	58765.5	70547.6	355.11	74813.2	80351.9	1763.09	84376.5	110968	10890.9	69981.8	58205.1	790.32	128052	202471	1123.18	106246	111362	635.46	175804	253120	2054.12	72524.2	67947	979.89
943	35271.8	29136.8	342.65	66666.8	59965.5	1583.31	111476	168392	4371.68	61491	64962	705.77	58906.5	90868.1	525.1	83037.8	90657.2	2849.78	54150	54944.1	258.99	49553.2	34216.1	1538.81	60700.5	80062.6	634.57	54363	42448.6	257.21	51000	34857.7	210.04	72009	61477.6	614.99
944	36101.2	37897.1	463.69	57055.5	49111.1	379.14	61547.2	69842.8	465.47	40239.8	36181.2	635.46	90271.5	119342	720.9	69226.5	45453.2	1149.88	36973.5	37761.8	190.46	62608.5	55520.9	774.3	123548	183295	1463.16	74697	62446	1691	62230.5	50327.7	350.66	66698.2	46462.4	741.37
945	53651.2	59198.3	683.52	69276.8	52167.3	1602.89	135614	137107	2196.52	42317.2	72777.1	773.41	131598	168212	510.86	64379.2	50834.1	929.16	41332.5	50251.2	392.49	114704	61725.1	1219.3	69681	84745.8	792.99	85646.2	52477.1	832.15	63399	89745.8	754.72	50331.8	38273.6	446.78
946	41771.2	50940	860.63	42021.8	22275.8	402.28	54651.8	67879.4	368.46	72213	94531.4	1030.62	106381	126026	2695.81	43989	27899.7	509.08	66647.2	91243.7	536.67	76389	82408.7	986.12	95490	115264	827.7	70248	70729.2	919.37	72408.8	93373.5	885.55	94494.8	118313	1214.85
947	41096.2	45228.9	736.92	39982.5	21455.2	524.21	66010.5	93329	614.1	35902.5	27089.8	149.52	90291.8	146530	977.22	57959.2	33948.2	184.23	34372.5	34398.5	554.47	85150.5	90299.4	664.83	155698	173138	1567.29	162718	115646	1719.48	157247	262143	6271.83	72228.8	75909	1033.29
948	37836	35413.1	519.76	42591.8	25249.3	412.07	154376	233234	5420.99	61007.2	58176.6	744.04	66160.5	96555.2	1628.7	78612	62808.2	1171.24	43208.2	49887.2	716.45	237121	190091	15376.5	233003	262143	3186.2	164079	143185	4520.31	48536.2	58764.9	423.64	49299	38953.5	742.26
949	43929	42914	1159.67	59403.8	45717.5	752.94	65595.8	100682	1070.67	42054	46086	526.88	262143	262143	3225.36	58007.2	59064.8	1022.61	49123.5	49999.3	1138.31	45596.2	38844.9	691.53	99898.5	136401	2338.92	98529.8	69212.6	229.62	76154.2	98795.3	736.92	97224	88523	1217.52
950	51543	55680.2	659.49	135964	115388	2216.99	58152	66248.9	333.75	39166.5	32533.1	537.56	65304.8	96837.3	339.09	48737.2	45800.3	549.13	134485	160338	5687.99	142533	186063	2244.58	82248.8	124661	992.35	103813	134782	1525.46	99444.8	135860	931.83	66615	45399.8	604.31
951	44783.2	58629.6	1149.88	143805	138262	6289.63	62010	75265.5	461.91	45341.2	62884.7	829.48	109801	129739	1695.45	62802.8	55569.8	1294.06	174888	262143	4140.28	45909.8	43020.8	493.06	74847	122741	385.37	48153	39698.4	654.15	90888	131801	1631.37	68360.2	74897.9	1054.65
952	33525	25504.7	691.53	68517	62968.4	761.84	54560.2	57883.8	121.04	38980.5	40584	357.78	69990.8	87524.4	466.36	199058	157632	6166.81	36596.2	34796.3	527.77	95187.8	93833.6	1681.21	58890	99411.2	654.15	135960	132157	5448.58	112794	144227	788.54	67836.8	50957.8	1540.59
953	88041	94864.2	1104.49	157654	129789	6460.51	48836.2	50086.5	376.47	67158	87638.3	682.63	108159	169142	1180.14	60732	39619.2	124.6	52320	74095.2	832.15	74127	49653.1	803.67	81376.5	169330	666.61	65716.5	69773.3	1251.34	64863.8	86867.6	887.33	78522.8	69843.6	257.21
954	45292.5	62981.7	396.94	67549.5	56999.2	652.37	100920	179353	1628.7	40924.5	44553.4	465.47	107415	160777	2195.63	80180.2	60207.6	2995.74	59528.2	63219.4	735.14	46977	28936.6	537.56	87045.8	137948	2670	167065	142803	1239.77	108982	146916	2208.09	48041.2	47555.4	340.87
955	41018.2	42762.7	214.49	31212	26263.9	444.11	56595.8	54085.3	243.86	219774	262143	2935.22	56301.8	75759.5	421.86	95187.8	78158	495.73	64239	99988.8	2189.4	57255.8	80745.2	1543.26	52861.5	78085	577.61	91362	102386	2391.43	80477.2	135316	420.97	50041.5	48759.5	317.73
956	43832.2	47640.8	824.14	48835.5	42144.2	567.82	53520.8	64901.5	595.41	39678	41743.7	348.88	79154.2	105340	860.63	66049.5	51665.4	592.74	88605.8	149728	1787.12	38459.2	34005.1	372.91	68470.5	89960.3	1537.92	67596	57177.2	497.51	121216	158367	1575.3	74943	86513.3	1793.35
957	39843	41150.9	1807.59	88290.8	52476.2	625.67	52053.8	40269.8	205.59	74709	79686.1	1715.03	159033	165559	1367.04	99562.5	91471.5	1042.19	43310.2	57268.8	278.57	141464	73205.2	2065.69	115837	184668	2653.98	72239.2	79752.9	246.53	86268	91915.6	214.49	72719.2	74246.5	973.66
958	78593.2	91893.4	2563.2	70983.8	58829.9	567.82	151924	168588	1691	35775	37760.9	490.39	74886	111754	978.11	56088.8	44622.8	552.69	42305.2	41772.1	364.01	47382	23612.6	291.92	54324.8	58234.5	2664.66	93504	95359.9	841.94	79992	116554	790.32	83805.8	82745.1	2758.11
959	50928	50652.6	588.29	199126	144117	1984.7	85155	125289	640.8	38577.8	23402.5	450.34	161888	253542	589.18	49495.5	31258.6	512.64	71319.8	118027	2680.68	84022.5	75789.7	1361.7	47002.5	41808.6	289.25	77898	62744.1	1354.58	88483.5	108432	691.53	51264.8	42755.6	1205.95
960	33072	27257.1	127.27	40425.8	31328.9	926.49	56034.8	54864.1	338.2	38752.5	41491.8	526.88	80796	127352	267	130393	80011.9	2195.63	39471.8	54381.7	501.96	63464.2	55513.8	688.86	64734.8	80233.5	382.7	100882	71598.7	1417.77	160378	231953	1222.86	244649	202350	1417.77
961	34961.2	38609.1	444.11	56406	40240.5	1094.7	101973	165674	803.67	60113.2	75137.4	489.5	102856	131182	300.82	65167.5	39338.9	368.46	48466.5	53045.8	145.07	70709.2	52715.6	1696.34	121858	157768	1653.62	139050	107682	3339.28	80970.8	113868	957.64	100813	115487	1445.36
962	37498.5	29305	254.54	103065	104124	2319.34	49701	50738.9	264.33	44005.5	53161.5	427.2	64477.5	98145.6	182.45	42929.2	34633.5	898.01	89881.5	118088	1497.87	96067.5	96248.2	2081.71	230384	262143	6185.5	41376	26307.5	121.04	55460.2	69487.6	917.59	50727.8	50443.4	588.29
963	53418	64665.6	114.81	62357.2	43637.6	1926.85	151833	216909	2792.82	34923.8	37996.8	322.18	118732	246046	328.41	71970	55071.4	2336.25	72439.5	93363.7	781.42	136862	122507	7421.71	129865	217638	2107.52	64008.8	57025.9	1017.27	159639	200084	1921.51	68932.5	101108	647.03
964	41688	47392.5	689.75	55566	32829.4	499.29	62847.8	82610.7	385.37	56538.8	47212.7	873.09	99276.8	183940	2635.29	41184	32654.1	611.43	80919	97411.4	4758.83	151587	152961	4544.34	95836.5	113269	478.82	119296	142587	2408.34	94426.5	124504	1010.15	74782.5	96703.8	307.94
965	33813	36312.9	300.82	76446	53618.1	921.15	57641.2	59067.5	476.15	59102.2	73038.7	730.69	10762.5	62823.3	7.12	115742	92418.5	1109.83	28561.5	31556.7	210.04	80321.2	93343.2	1165.01	65703.8	77086.5	637.24	84276.8	83654.7	773.41	85440	136778	1704.35	148540	188891	3272.53
966	43587.8	48120.5	1233.54	43774.5	32354.2	1175.69	68976	100509	543.79	44121	53181.1	566.04	80396.2	126481	759.17	49479	36056.6	486.83	35079.8	36644.9	426.31	118756	114072	420.08	82902.8	103322	872.2	84348.8	93038.8	2400.33	64773	129778	1021.72	133050	113887	3889.3
967	42104.2	66236.5	673.73	40134	25926.6	209.15	105413	162963	1169.46	36740.2	36312	876.65	60297.8	72099.8	401.39	73867.5	53725.7	1342.12	70233.8	105758	689.75	70333.5	91023	5782.33	90549.8	124528	937.17	61485.8	72765.5	354.22	81271.5	118918	3713.97	92610	71950.3	931.83
968	39567.8	39315.8	519.76	77859	54227.7	713.78	64098	70777.2	2412.79	37223.2	40365.9	582.95	93515.2	169274	2944.12	44337	29677.9	291.92	39965.2	33974.9	356	176700	164401	5197.6	87797.2	120453	3144.37	71867.2	45371.3	695.98	91344.8	35618.7	606.98	70599.8	52836.6	2492
969	51282	51322.7	1241.55	62721	50063.4	847.28	71163	96029.2	1087.58	51058.5	67544.8	784.98	63049.5	77950.6	476.15	97898.2	89363.1	2071.03	40077	41188.3	655.93	102939	88618.2	9350.34	74530.5	113275	881.99	185286	173294	5391.62	75637.5	98868.3	331.08	84527.2	95393.8	5045.41
970	39741.8	59795.5	553.58	92050.5	72853.6	1655.4	75187.5	98498.1	619.44	39015	46611.1	946.96	57827.2	58310.1	371.13	64315.5	56633.4	914.03	83806.5	84731.6	1894.81	195044	172327	3406.92	155360	256811	3473.67	71296.5	60763.9	961.2	75320.2	201636	1625.14	76024.5	98770.4	1286.05
971	32865	26446.3	271.45	102387	76269.4	964.76	75911.2	110294	876.65	60579.8	66674.4	656.82	114752	185593	1195.27	60774	56634.3	724.46	45119.2	55587.6	553.58	70385.2	63616.3	2019.41	119366	133739	811.68	100051	94591.9	1579.75	60321	48134.8	220.72	108735	112573	1187.26
972	39679.5	44442.1	570.49	64782	57860.7	309.72	77366.2	115812	688.86	45600.8	42371.1	877.54	67640.2	98683.2	1009.26	79085.2	72392.6	1589.54	68421	124140	594.52	119662	85615.3	519.76	152538	195141	1217.52	75310.5	65683.8	1019.94	89376	139087	995.02	57597	47882	764.51
973	33296.2	36773	374.69	37655.2	27986.9	1058.21	105517	160956	2434.15	44923.5	50396.2	359.56	83085.8	130786	767.18	83183.2	45879.5	578.5	42616.5	67194.1	157.53	121828	71218.7	2119.98	118282	204748	1819.16	87861.8	92228.9	826.81	225044	262143	18152.4	89661.8	82070.5	1076.01
974	36372	22073.8	474.37	60184.5	49026.5	417.41	102910	144394	1910.83	57845.2	55654.4	655.93	79117.5	104018	662.16	85328.2	79647.9	2095.06	157790	262143	3767.37	105751	80064.4	1146.32	91492.5	115552	1005.7	132309	105351	3990.76	75206.2	98499	1359.92	110438	92752.2	2143.12
975	55106.2	64911.3	1035.96	85268.2	56236.4	1650.95	59983.5	67671.1	497.51	43865.2	50414.1	493.06	187496	262143	2459.96	49963.5	43193.5	1385.73	95121.8	82924.9	2435.04	117878	129381	2894.28	94376.2	157846	2953.02	96572.2	58243.4	1149.88	136528	174708	1497.87	74191.5	80342.1	1864.55
976	130288	236309	1787.12	55683.8	39720.7	716.45	69734.2	103674	1014.6	62279.2	69250	1591.32	55416	83157.1	880.21	60498	37072.9	854.4	113536	186850	2535.61	160018	111176	1704.35	94629	163225	929.16	253276	249415	7637.09	127294	178387	4218.6	135387	138365	763.62
977	83928	94553.6	394.27	92124	84378.2	3061.6	61402.5	84041.8	1534.36	45987.8	53709.7	178.89	58914	72001	130.83	81699	61148.3	781.42	53554.5	63661.7	1243.33	111878	101200	3088.3	146734	182381	1811.15	68052	71855.9	207.37	156168	260964	10491.3	44069.2	38067.1	1104.49
978	44832.8	42436.1	220.72	65980.5	50918.7	732.47	99961.5	162542	718.23	42408.8	48545.1	223.39	114676	154289	2268.61	75444.8	63441	744.93	74063.2	85088.4	1615.35	60815.2	57620.4	1026.17	59122.5	55592.1	435.21	45944.2	42266.1	412.96	124624	165303	1233.54	79631.2	44589	1511.22
979	38439.8	31125.1	292.81	47116.5	29346	1502.32	65281.5	72730.8	817.02	46263	49476.9	1562.84	61855.5	91914.8	825.92	66164.2	40990.7	1181.92	50252.2	52288.4	513.53	44726.2	35297.4	436.99	116062	150711	458.35	41595	35793.1	995.02	108099	157892	1246.89	81614.2	64570.4	860.63
980	51548.2	56342.3	981.67	42751.5	38851.2	550.02	102043	150444	1331.44	45599.2	45511.9	476.15	190372	262143	2262.38	143012	119561	4994.68	88248	113976	2249.92	81138	62812.6	2480.43	92040	129018	1517.45	131824	134552	1601.11	123898	262143	4324.51	74844.8	81758.1	1376.83
981	44999.2	44884.5	922.04	65700.8	74576.7	497.51	117787	179700	3205.78	36071.2	35921.3	396.94	54955.5	63787.2	500.18	45942.8	28171.2	399.61	42332.2	54023	1174.8	136294	99811.7	6383.08	204309	262143	10142.4	243302	255544	42315.1	49534.5	46054.8	40.05	61395.8	54266	1221.97
982	37633.5	41765	1707.02	74201.2	63721.3	926.49	91853.2	126174	1154.33	51135	79228.7	258.99	118496	180324	1049.31	126198	107316	2639.74	100326	126095	1781.78	246646	216920	3083.85	124698	189794	1440.91	238076	193968	1171.24	57176.2	79978.1	917.59	119229	124639	4533.66
983	33322.5	29937.8	216.27	210341	171596	3050.03	84293.2	127357	1246	37708.5	45390.9	444.11	53961.8	50519.1	226.06	46690.5	36668.9	436.99	46467	43359	574.05	49539	36513.1	581.17	106539	194666	2556.97	56490.8	59591.7	461.02	130810	133996	1650.06	89049	90561.1	1820.94
984	42798	49948.6	138.84	68788.5	43232.6	922.93	65991.8	70406.1	117.48	43683.8	28961.5	319.51	63358.5	69556.2	991.46	197448	158917	1744.4	58394.2	75112.4	656.82	56292.8	43594	1511.22	52155.8	59112	1620.69	42609.8	40968.5	499.29	83156.2	103891	3570.68	75676.5	48167.7	774.3
985	42718.5	46728.6	155.75	40926	25609.8	354.22	57044.2	74960.2	799.22	91440	132366	1215.74	68514	90637.6	641.69	71431.5	45192.4	1110.72	66516.8	82533.3	825.92	55990.5	41322.7	1875.23	105723	117793	2133.33	88996.5	97293.9	1035.96	116167	139417	3591.15	36649.5	24547.1	78.32
986	38676.8	41139.4	440.55	125115	103248	1468.5	135974	189268	1537.92	36637.5	41907.4	224.28	85410	99644.4	380.92	65618.2	52714.7	481.49	59523	72085.5	660.38	69481.5	63050.3	752.05	146065	193259	614.1	113736	116191	2296.2	52307.2	31072.6	161.98	105898	86435	702.21
987	68855.2	104215	991.46	87354	80384.8	2701.15	77439.8	142350	424.53	36294	25986.2	282.13	67522.5	93210.6	565.15	76743	60357.1	1175.69	39703.5	34589	413.85	111534	93941.3	3070.5	117739	129376	3430.06	59551.5	47885.6	224.28	69667.5	93916.4	704.88	196592	174999	1532.58
988	35496	25695.2	153.08	126766	139485	2034.54	54815.2	51679.6	549.13	36980.2	26312	113.92	51803.2	48087.6	261.66	116176	106203	1124.96	55652.2	69031.1	1284.27	85419	64205.5	2136	155870	171160	1669.64	131858	120453	3616.07	130053	262143	2411.9	83403	90853.9	1183.7
989	37740	33222.8	654.15	62821.5	58926.9	684.41	60865.5	71284.5	1068.89	49461.8	57085.5	561.59	66617.2	94473.5	704.88	121996	132526	1852.09	82188	110647	1794.24	69478.5	49929.9	567.82	59455.5	101201	2448.39	73266	55347.3	670.17	60687	76539.1	628.34	75227.2	75375	1100.93
990	49877.2	49751	1054.65	52764	46715.2	684.41	77024.2	89696.9	857.07	50520	63571.8	1025.28	73782.8	130975	1287.83	57108	53655.4	739.59	27844.5	28666	182.45	54849	38559.2	2075.48	103609	190594	6878.81	71475	69987.8	693.31	163748	192543	1298.51	112503	77357.9	3149.71
991	42144.8	54008.8	490.39	84657	68734.7	1083.13	114755	148639	2572.99	53797.5	57300.9	632.79	101450	119921	647.03	52349.2	44108.4	532.22	72853.5	109736	3440.74	70595.2	45668.6	204.7	85241.2	102111	645.25	76165.5	94438.8	2167.15	229088	262143	4773.96	83649	70403.4	898.01
992	35395.5	35058	1019.94	38372.2	30634.7	529.55	167654	174898	1613.57	77463.8	75050.1	1024.39	120222	161402	1389.29	76259.2	60022.5	1341.23	53709.8	67610.6	674.62	71585.2	79110.3	1119.62	98189.2	93486.5	2485.77	53508	42161.1	412.96	116371	179442	1429.34	98712.8	66658.3	1900.15
993	36771.8	37642.6	356	49695	43108	1068.89	116276	141639	2527.6	37551	24521.3	101.46	59384.2	84082.8	550.02	69052.5	64175.2	2139.56	42477.8	49572.1	512.64	55684.5	46210.6	409.4	69131.2	98574.6	2320.23	56799.8	37942.5	1264.69	143568	198377	1506.77	63072.8	63307.5	2440.38
994	29868.8	27069.3	770.74	155503	96455.5	1253.12	58730.2	64157.4	242.08	44158.5	57975.5	252.76	80715.8	132144	719.12	89001.8	74170.8	2362.06	91320.8	131840	2447.5	88736.2	78779.2	1092.92	88611	134003	1061.77	262143	262143	8516.41	204543	262143	12056.8	108437	73470.4	707.55
995	54615.8	67333.8	731.58	54439.5	43239.8	1284.27	87594.8	132720	1698.12	34487.2	33514.7	348.88	160201	262143	651.48	69407.2	55576.1	1028.84	42201	51868.3	563.37	35456.2	29462.6	749.38	142196	212271	1913.5	181850	199491	3943.59	171548	255995	1972.24	68241.8	74414.7	711.11
996	46179	59035.5	669.28	64185.8	44893.4	890.89	91123.5	126410	600.75	62228.2	74695	387.15	62189.2	84672.8	448.56	44579.2	31238.1	477.93	55280.2	50419.4	622.11	262143	262143	17869.4	53887.5	70797.7	192.24	99266.2	119841	5021.38	118112	178499	1458.71	49247.2	45221.8	312.39
997	32887.5	19944.9	70.31	44852.2	32070.3	614.99	79292.2	110283	638.13	39783	45287.6	404.06	101514	156827	1625.14	70425	64711	1294.06	59850	72106	247.42	211343	189441	4748.15	94528.5	154479	1118.73	254642	262143	16525.5	78060.8	123471	1799.58	88052.2	62379.2	1116.95
998	49539.8	53005.7	1292.28	84987	52384.5	744.93	55248.8	77956.9	473.48	78092.2	85187.2	1130.3	100148	142847	2510.69	53231.2	34883.6	674.62	39179.2	32632.7	471.7	219255	216864	3813.65	121574	215743	2647.75	92114.2	89049.8	394.27	67387.5	118937	776.97	51984	59524.1	291.03
999	58869.8	62051.7	949.63	68191.5	43593.1	852.62	100330	148331	1016.38	44528.2	30098.9	396.94	95019.8	131564	905.13	74611.5	52837.5	922.04	119384	162093	3182.64	52570.5	39525.8	900.68	93823.5	92055.4	1174.8	86106	127814	1901.04	75490.5	105214	824.14	60088.5	53756.9	2227.67
1000	87123	120432	3349.96	120982	90573.5	2705.6	91543.5	120945	776.08	43883.2	51328.1	481.49	53622.8	48875.2	257.21	63805.5	60106.1	943.4	50218.5	60043	769.85	55754.2	22485.8	106.8	83023.5	125460	875.76	69174.8	105250	725.35	115818	209308	4895	74165.2	59737.7	2241.91
1001	43281	28248.6	319.51	81925.5	76995.7	992.35	75951.8	100783	1227.31	92367	88555.9	951.41	52530	58222	599.86	157282	114143	1691	64934.2	93547	250.98	68333.2	61333.5	1045.75	47236.5	50178.2	957.64	164242	145243	3143.48	100059	136951	1018.16	124715	106006	1172.13
1002	71649	91524	1945.54	68279.2	52441.5	570.49	70089.8	85351.9	662.16	37833	35212.8	387.15	51809.2	55511.1	388.93	73080	74485.9	957.64	102920	157211	9234.64	57444.8	54068.4	467.25	94693.5	161575	1227.31	215847	262143	5671.97	109916	134633	1376.83	136784	163054	14547
1003	58138.5	60320.6	558.92	50247	27852.5	603.42	73423.5	138702	835.71	36977.2	30754.8	645.25	58791.8	65836	372.91	59257.5	50624.1	1282.49	163342	194237	3855.48	111470	67317.8	2182.28	70222.5	88587.9	141.51	124612	94159.3	1958	101153	119936	389.82	52188.8	100179	490.39
1004	58461	73291.5	940.73	81075	49696.7	1444.47	101763	172583	1201.5	37602.8	27349.7	286.58	54308.2	54157.4	150.41	84049.5	63111.7	1186.37	124126	117633	1761.31	43463.2	37336.4	308.83	94855.5	113841	960.31	71014.5	65823.5	574.05	93523.5	118305	2509.8	110420	100462	1241.55
1005	36505.5	30663.2	506.41	59280	46547.9	1928.63	66885	64048	682.63	59664	68514	811.68	88184.2	124808	606.09	85128	75012.8	968.32	188276	262143	3956.94	115774	98545.2	1071.56	43690.5	60018.9	994.13	84047.2	77592	1266.47	195843	262143	2767.9	92877	98039.7	1533.47
1006	42847.5	50293.9	229.62	58121.2	45093.6	1342.12	142930	175437	1777.33	35620.5	26302.2	268.78	56169.8	73915.4	584.73	56625.8	44151.1	577.61	88584	110761	3786.06	98966.2	86572.1	3581.36	84085.5	181590	3973.85	92691.8	74859.7	1617.13	100856	143025	2168.04	68775	57480.6	201.14
1007	42932.2	53729.3	468.14	71478	48689.2	541.12	120902	172400	2943.23	41400.8	36134	288.36	45473.2	47874.9	218.05	75059.2	64746.6	1493.42	57977.2	74576.7	925.6	66831	52995.9	1788.01	87545.2	111331	339.98	157666	134682	6788.03	191226	262143	18898.3	85325.2	76843.5	521.54
1008	36633	34947.6	542.9	56696.2	50034	414.74	68916	29561.3	487.72	34209	34115.5	328.41	64735.5	75422.2	733.36	56324.2	46880.8	1432.01	65344.5	88765	382.7	89907.8	97416.7	2000.72	56471.2	48935.8	535.78	57648	45762.9	888.22	125308	236937	2714.5	211064	239141	15857.1
1009	91096.5	98669.9	3130.13	54597.8	40608	1517.45	76128.8	104219	1011.93	40073.2	40617.8	647.03	118656	129786	854.4	52262.2	42661.3	760.06	221901	262143	7111.1	88100.2	51474	776.97	165478	262143	8584.94	98222.2	90371.5	776.08	171836	262143	4619.99	152152	206702	2728.74
1010	36247.5	39176	590.96	79083	68219.4	362.23	109408	160681	3249.39	38589	32277.6	91.67	59951.2	93301.4	465.47	158590	148399	3675.7	44236.5	54445.8	989.68	124934	98046.9	2006.06	161184	262143	3475.45	53201.2	44846.2	919.37	184911	262143	5367.59	80401.5	67397.9	270.56
1011	67386.8	76654.8	1189.04	92140.5	78457.1	2156.47	59141.2	60569.8	124.6	40245	29348.6	320.4	153486	185063	1497.87	79020.8	53742.6	2324.68	34919.2	40196	1147.21	48278.2	37863.3	807.23	116022	156566	906.91	65143.5	48442.7	546.46	50664	71661	381.81	72749.2	74946	4314.72
1012	31911.8	25738.8	367.57	76261.5	54640.7	682.63	87391.5	92131	573.16	37779.8	33585.9	388.93	55772.2	85959.8	441.44	57276.8	40452.3	1755.97	49632.8	43845.8	824.14	65347.5	52692.4	461.02	62988	99754.8	296.37	61260	61109.2	1080.46	198994	262143	2330.02	117284	119381	2414.57
1013	59573.2	56657.4	1201.5	129935	116532	1854.76	177327	262143	2226.78	37505.2	33671.4	310.61	62280.8	92625	687.08	66137.2	59992.2	368.46	60813	80444.4	2686.02	123786	82365.9	1626.03	196052	237594	12098.7	142144	138500	2097.73	42929.2	34959.2	549.13	80806.5	89672.8	1681.21
1014	31731	30605.3	343.54	55728.8	42584.7	548.24	77955.8	113085	885.55	71020.5	70787.9	764.51	78405	172934	955.86	76104	63582.5	964.76	52431.8	63732.9	776.08	73825.5	66201.8	422.75	81969	122606	1434.68	102344	106226	1189.93	76846.5	98970.7	2687.8	82765.5	96917.4	811.68
1015	56128.5	52778.8	524.21	41445.8	27985.2	243.86	88778.2	118544	1115.17	76347	95078.7	2103.96	60594.8	74956.7	720.9	60150	44781.2	614.1	73366.5	62764.6	1812.93	76566.8	53261.2	169.1	129159	223370	2653.09	160150	148704	1515.67	91097.2	173236	1219.3	46746	36967	411.18
1016	33787.5	29236.5	446.78	48517.5	31378.7	336.42	60204.8	80376.8	755.61	33420.8	17832	132.61	66762.8	85447.1	2118.2	88719.8	78574.5	771.63	79397.2	110939	1637.6	59472	66258.7	2209.87	153304	241709	3718.42	104162	88309.4	2987.73	106101	149786	1351.02	59525.2	48157	589.18
1017	42308.2	49206.3	477.04	67444.5	41298.7	672.84	64715.2	84632.8	436.1	46679.2	55782.5	899.79	82719	128882	534.89	110539	56915.5	2104.85	45672.8	45411.4	994.13	45122.2	41357.4	1388.4	149984	257721	2306.88	51723.8	73104.6	1226.42	79728.8	111029	438.77	95694.8	83112.6	464.58
1018	56053.5	65244.1	1193.49	77963.2	74148.6	1115.17	75042.8	108505	1610.01	61388.2	80991.8	1205.95	56940	69671.9	535.78	52092	38623.3	594.52	54216.8	55906.2	671.95	87635.2	78765.9	550.02	92323.5	175698	1299.4	153210	131560	2756.33	60296.2	86770.5	617.66	53040	53922.4	220.72
1019	35239.5	39177.8	309.72	67536.8	55757.6	1221.97	67413.8	84837.5	468.14	35251.5	24994.8	175.33	53229	46134.9	349.77	80374.5	66439.4	1085.8	91363.5	125174	1707.91	73725.8	56272	700.43	57127.5	63410.7	827.7	99252.8	120546	1613.57	86793	136886	2330.02	74814	40981.8	747.6
1020	33708.8	29577.4	477.04	54999.8	48125	746.71	69819	90284.3	833.04	34473	24426	65.86	61596	58202.4	425.42	64452	44730.5	865.97	51569.2	54159.2	2614.82	82810.5	71051.4	1221.08	55788	61002.4	454.79	132290	91091.5	2238.35	63080.2	82251.1	577.61	95700	84954.9	633.68
1021	38583	41092.2	360.45	95721	65369.6	838.38	59342.2	67102.4	517.98	37928.2	36091.3	60.52	76123.5	146539	1790.68	60897	49089.7	1000.36	50458.5	62843.8	1211.29	52233.8	25119.4	460.13	67811.2	80944.6	709.33	60903	50614.3	717.34	63627	104369	2266.83	51003	41262.2	571.38
1022	42687	34775	230.51	63984	56372.6	296.37	61225.5	75346.5	374.69	63816	57728.1	737.81	57969.8	69159.2	317.73	49549.5	33032.3	575.83	64839	67866.9	401.39	69989.2	60393.6	802.78	54486	55774.5	436.1	88585.5	117114	1569.07	75716.2	113219	2897.84	42802.5	37703.1	375.58
1023	36172.5	27479.6	161.09	53499.8	32958.5	442.33	130674	232580	2736.75	35057.2	33127.6	396.94	90759.8	120003	447.67	40613.2	28128.4	496.62	44795.2	60464.8	478.82	48382.5	40047.3	544.68	181041	208679	2318.45	94602	96139.6	11525.5	82928.2	129971	558.92	145499	175849	3077.62
1024	60895.5	69605.1	379.14	66207.8	50425.6	768.07	63231	88462.4	558.92	54942.8	65934.8	164.65	103315	109699	1100.04	61065.8	56866.6	921.15	39813.8	54177	503.74	57508.5	42445.9	711.11	87072	213612	1893.03	57747.8	39346.9	660.38	118929	170998	1208.62	128024	101378	1146.32
1025	36033.8	22351.5	295.48	76767.8	48675.9	1281.6	136482	219430	1577.97	126996	147460	522.43	262143	262143	2578.33	60156	55811.9	747.6	52032.8	71089.6	410.29	105716	123804	3906.21	59973.8	46652	939.84	59508	69585.5	1140.09	50403.8	61052.2	158.42	64796.2	58438.3	2372.74
1026	53622.8	66756.2	827.7	44928.8	36736.5	473.48	86909.2	131172	478.82	37743.8	29535.5	197.58	122753	150706	1003.92	47487	26842.4	205.59	93784.5	125308	4509.63	44740.5	31432.1	500.18	76140.8	98178.6	864.19	115208	89465.5	1251.34	174139	262143	5372.93	105722	95606.5	480.6
1027	44136.8	34234.7	356	111564	100819	1279.82	65541.8	75549.4	433.43	34862.2	26480.2	198.47	72714.8	112080	197.58	43482.8	31446.4	943.4	36530.2	40897.3	889.11	196548	220727	8723.78	129730	149672	775.19	85171.5	60765.6	772.52	101539	179380	1017.27	74760.8	57231.4	1700.79
1028	33743.2	39826.6	1590.43	68222.2	55607.2	868.64	53366.2	63435.6	462.8	50982.8	47607	1005.7	71886	96039.9	828.59	70906.5	60819	716.45	45606	53788	906.91	262143	262143	9883.45	58890	69050.6	729.8	67521.8	122442	4884.32	57912	61782	461.91	92537.2	82592.9	919.37
1029	51111.8	52334.7	1059.1	93409.5	53682.1	799.22	74843.2	107899	573.16	40883.2	32971.8	498.4	55654.5	52601.7	161.09	57573.8	52081.9	239.41	63141.8	81985.9	1733.72	44793.8	41899.4	441.44	80979	114880	2110.19	55386	40086.5	287.47	160089	217641	3529.74	96395.2	75258.4	501.96
1030	37530	32535.7	256.32	78924	77082	707.55	118611	176539	1159.67	50667	58570.9	277.68	52926	58190.9	631.01	73360.5	67193.2	691.53	106252	146656	678.18	142077	132978	4194.57	135051	198271	1671.42	110686	107304	1099.15	128439	212148	1905.49	94602.8	59259.8	1172.13
1031	46322.2	61426.9	540.23	78094.5	68741.8	1122.29	56868	69616.7	228.73	34604.2	31803.3	272.34	88849.5	145807	1558.39	68739.8	44841.8	1172.13	57999	67398.8	589.18	87204	78891.4	1008.37	72987	104030	544.68	255941	188229	2904.96	78441	111112	893.56	121245	108188	1768.43
1032	61737	73308.4	1128.52	71339.2	51416.2	2359.39	123673	241394	1399.97	38199.8	28929.4	280.35	71924.2	97506.6	712	69933.8	65116.8	943.4	125185	139607	7914.77	138161	101649	6012.84	93577.5	142783	283.02	77976.8	82200.4	1127.63	48983.2	57457.5	378.25	84500.2	63418.7	9179.46
1033	38872.5	43347.4	110.36	54719.2	62277.8	1152.55	101552	142186	702.21	40962.8	35843.9	576.72	60633	64099.6	307.05	112646	71800.8	3032.23	48944.2	60376.7	2027.42	77604.8	72649.8	1496.09	117654	157388	1253.12	208362	174444	3089.19	187456	254419	7145.81	76251	68633.2	266.11
1034	52208.2	57338.2	598.97	38682.8	25185.2	392.49	94283.2	115396	842.83	42525.8	30920.4	187.79	106456	162684	1279.82	181216	153738	3649.89	36177	36472.2	349.77	81783.8	97694.4	3552.88	128278	205092	2587.23	64952.2	53975.8	1533.47	63873	88167	901.57	84288.8	60905.4	783.2
1035	68691.8	74671	1845.86	47749.5	37569.6	533.11	58470.8	58048.5	357.78	89495.2	119535	5632.81	85996.5	117413	857.96	65795.2	55072.3	572.27	48308.2	85303.8	1612.68	101919	79541.1	4020.13	83808.8	142356	983.45	75621.8	80526.3	444.11	134348	165746	3054.48	133214	102553	4792.65
1036	48086.2	64510.8	1832.51	47176.5	36150.9	451.23	144259	173546	2873.81	45625.5	61983.2	606.98	73085.2	124947	822.36	58193.2	37154.8	1090.25	39018	39338	401.39	37059.8	28021.7	242.97	71926.5	100471	1275.37	148350	155839	2529.38	123980	179334	4078.87	49096.5	48812.9	524.21
1037	50260.5	68836.2	875.76	55129.5	37194	693.31	134071	169045	974.55	97911.8	107431	1059.1	124962	135598	921.15	50466	34846.2	1005.7	106412	131012	1893.03	46862.2	24110.1	160.2	69729.8	88162.5	907.8	77417.2	75278	198.47	81939.8	149503	683.52	142594	178800	2246.36
1038	113646	99637.3	2386.09	89016	74039.1	458.35	65850	87147	794.77	46830	59274.9	793.88	60873	57854.4	227.84	62170.5	44194.7	676.4	44146.5	47707.6	489.5	36533.2	25729	426.31	78588.8	89954.1	821.47	80236.5	74221.5	735.14	81295.5	116514	742.26	66669.8	64219.7	829.48
1039	40880.2	64284.7	256.32	61781.2	43396.4	952.3	63524.2	83721.4	284.8	55383.8	70100	518.87	92725.5	137727	1555.72	53469	21667.9	878.43	90555.8	148153	1191.71	90954.8	105694	546.46	123212	206320	5287.49	125574	116303	827.7	129384	108437	1403.53	82299.8	72934.6	5625.69
1040	41144.2	36348.5	1113.39	46922.2	35538.6	480.6	120126	157902	1121.4	38853	36088.6	468.14	58882.5	63240.7	382.7	84349.5	62928.3	1249.56	41145	48950	1364.37	41663.2	28745.2	394.27	65502.8	82213.8	679.07	128384	128976	5356.02	69096	91753.7	1439.13	137156	83522	2362.95
1041	68328.8	117953	1731.05	63087.8	61926.2	938.95	81171	119434	1132.08	50673	60308.2	477.04	110823	131195	658.6	50332.5	38840.5	579.39	30780	44647.7	170.88	141772	124819	1999.83	157650	223889	4917.25	64245	78629.7	1187.26	73122	91897.8	197.58	64806	43042.2	1102.71
1042	74204.2	101346	880.21	45791.2	28635.8	618.55	67746.8	89356.9	745.82	34116	23894.7	345.32	81703.5	102410	1043.08	142124	124438	2127.99	46740.8	53254	411.18	60636.8	43831.6	1400.86	104101	161523	1973.13	98993.2	98230.2	947.85	113097	158257	1231.76	63572.2	62965.7	355.11
1043	65883	73457.9	636.35	48219	33937.5	862.41	126392	204215	1356.36	45692.2	55794.1	946.96	160202	187673	1372.38	45723.8	36053.9	774.3	37670.2	33535.2	254.54	71764.5	50341.1	686.19	185126	262143	3341.95	103082	96774.1	505.52	103426	126997	304.38	123932	112089	2365.62
1044	51267	62318.7	320.4	37260.8	26057.4	204.7	59926.5	89243	1205.95	41187.8	48930.4	620.33	114578	167818	955.86	77102.2	65559.2	287.47	81570	107231	3150.6	135358	130967	3900.87	134994	137440	8644.57	58230	41272	756.5	178879	262143	3195.99	37137	34298.8	1982.92
1045	35180.2	32738.7	341.76	68799.8	79186	867.75	43992.8	36186.5	301.71	89652	158778	1047.53	76787.2	102460	779.64	59752.5	52057.9	1720.37	66672	92719.3	773.41	81150.8	77464.7	1293.17	62309.2	119210	3102.54	116055	127516	5433.45	125893	183978	2695.81	140847	134387	2074.59
1046	39584.2	37173.5	401.39	146657	159512	1920.62	66689.2	79285.6	436.99	39325.5	31897.6	110.36	74088	97988.1	1102.71	45746.2	26654.6	757.39	31849.5	31635	239.41	79272	61583.6	2828.42	110186	165599	1893.03	95618.2	98027.3	3174.63	164818	190936	2945.9	83151	59078.2	1511.22
1047	145396	185844	2780.36	58159.5	38558.4	418.3	56563.5	66723.3	277.68	40795.5	43504.1	485.05	64378.5	91084.4	996.8	49104	46173.2	1820.94	100011	87542.2	1068	61496.2	45050.9	980.78	44079.8	56510.6	367.57	65585.2	64159.2	427.2	75262.5	92727.3	3171.96	74265.8	71192.9	343.54
1048	39098.2	47432.6	549.13	68814.8	44629.9	648.81	65160	85683.9	1095.59	42918	45821.6	469.92	59936.2	71461.7	747.6	65196	52911.4	541.12	97691.2	102084	2304.21	54862.5	50790.5	215.38	98052.8	162101	1270.03	112158	127743	6702.59	156763	222279	875.76	71644.5	51160.8	704.88
1049	38422.5	41996.4	315.95	41446.5	22602.4	315.06	69396	105598	735.14	50718.8	49481.3	186.01	67279.5	94157.5	671.95	85891.5	84103.2	979.89	42019.5	49109.3	147.74	50695.5	38023.5	516.2	132507	209364	817.91	172027	179323	1893.03	62216.2	65973.9	484.16	102011	83804.2	3403.36
1050	64827.8	78417	2043.44	70124.2	48063.6	914.03	58006.5	73180.2	509.97	42835.5	58934.9	564.26	102697	124782	849.06	43971.8	36030.8	664.83	59397	82349	1253.12	112278	93872.8	2285.52	52150.5	66471.4	863.3	89979	89705.8	1464.94	72939	99326.7	386.26	68647.5	64452	859.74
1051	63999	100420	1294.95	49899.8	38530.8	1116.06	66358.5	75618.9	611.43	42734.2	45083.8	370.24	59451	75614.4	1213.96	55443.8	50512.8	691.53	63024	82584.9	2924.54	158454	105596	739.59	35245.5	44815.1	95.23	89743.5	98588	3435.4	114266	141140	448.56	64179	56061.1	1246
1052	38820.8	44261.5	455.68	71497.5	64517.9	752.94	62212.5	86575.6	872.2	70767.8	91201.9	1649.17	206196	262143	3693.5	39664.5	24068.3	453.9	69204.8	97243.2	250.09	59517.8	53221.1	824.14	63579.8	83293.3	2919.2	67274.2	35150.6	816.13	162947	183119	2052.34	101471	94755.6	6051.11
1053	37926.8	38809.3	1619.8	50260.5	37919.3	676.4	93348	163448	862.41	32716.5	40351.7	251.87	55959.8	53326.1	499.29	71016.8	60091	1709.69	102334	118897	1582.42	118621	115309	2634.4	159232	262143	11316.3	140738	128148	4473.14	110066	175775	371.13	262143	240592	2222.33
1054	68685	87738	1391.07	50450.2	36729.4	343.54	84879.8	127953	1002.14	49842.8	66151.9	441.44	91280.2	125604	795.66	75547.5	55092.8	1001.25	41586.8	39736.7	561.59	45085.5	60947.2	3234.26	67818.8	91481.3	949.63	135357	158065	1043.97	166512	262143	2531.16	145371	126328	2994.85
1055	35889	29552.4	1021.72	86285.2	54155.6	930.05	75163.5	107767	469.92	36012.8	39073.7	147.74	41904	37081	331.97	68560.5	50528	1848.53	50897.2	51288.9	914.03	41211.8	35211.1	533.11	69411.8	30033.9	809.01	89375.2	110154	1864.55	186915	190687	711.11	69923.2	62957.7	1027.95
1056	37213.5	42675.5	480.6	71193.8	39516.9	533.11	56326.5	63496.2	559.81	47580	60797.7	724.46	67632	93969.8	4530.1	68116.5	57607	1239.77	43677	46932.4	798.33	74082	65802.1	646.14	62916.8	73742.7	167.32	71895.8	44698.5	771.63	130958	250660	1382.17	135417	116005	5152.21
1057	37446.8	39698.4	716.45	38527.5	28062.6	238.52	87723.8	134470	906.02	58437	67023.2	875.76	103342	138561	969.21	64921.5	52007.1	649.7	53268	52235.9	959.42	38341.5	26858.4	574.94	54557.2	51791.8	295.48	90778.5	114155	1391.96	83778	117869	852.62	46055.2	42483.3	1027.06
1058	35169	22889.9	195.8	150547	142514	671.06	68161.5	104406	1532.58	52614.8	53435.6	962.98	53601	48746.2	273.23	53011.5	35748.6	5.34	32853	42498.4	558.92	117296	98002.4	509.97	78489	118998	3567.12	58566	64791.1	258.1	89430.8	124725	1348.35	48292.5	43575.3	436.1
1059	47547	52687.1	575.83	52876.5	46479.4	580.28	64275.8	93130.5	852.62	42189.8	50502.2	933.61	63822.8	78363.6	1221.08	39601.5	29717.1	331.97	49597.5	55218.3	760.06	116246	82071.4	1078.68	77934.8	58922.4	2586.34	84000.8	81941.4	790.32	55260	38378.6	242.97	86259.8	115242	1084.91
1060	51715.5	51264.9	423.64	75943.5	77848.3	1264.69	147387	149119	1205.95	37583.2	44776.8	789.43	52497.8	36114.4	139.73	152137	98725	1294.06	148795	130964	4257.76	70817.2	58238.9	469.92	157522	211047	2015.85	128731	98124.3	4074.42	132507	218645	1496.09	83574	104724	955.86
1061	41391.8	39680.6	97.01	46058.2	24685	412.96	63357	76883.5	818.8	37911	29518.6	490.39	57139.5	40867.9	386.26	49278.8	43862.8	506.41	62133.8	60155.1	868.64	81639	36925.2	735.14	122368	207926	3027.78	46872.8	33099.1	214.49	110194	107200	2238.35	135768	88717.9	1285.16
1062	43813.5	34651.3	186.9	59223.8	42357.8	631.01	124570	166742	2372.74	40005	32346.2	275.01	79689.8	119892	897.12	47603.2	41773	783.2	45228	62294.7	1265.58	69000	62363.2	1704.35	132736	117124	1640.27	143986	141376	3755.8	112953	170415	1003.03	95614.5	89198.5	1251.34
1063	57308.2	58781.8	631.9	56289.8	39662	371.13	73035	98194.6	1460.49	47290.5	59284.7	553.58	121250	152881	363.12	58350.8	48408	554.47	44312.2	40018	701.32	60414	53904.6	747.6	59721	72339.2	406.73	138546	125337	1897.48	135337	223743	2284.63	39620.2	39321.1	364.9
1064	38799	38368.8	381.81	153863	178682	2354.05	102236	168456	968.32	40119	50133.7	391.6	62344.5	87236.9	476.15	86193.8	75148.9	1644.72	262143	262143	17532.1	138088	113205	2583.67	146392	231691	6454.28	132082	262143	2062.13	84426.8	69295.4	185.12	69549	86439.5	1480.07
1065	51640.5	54980.6	1167.68	41151	24192.9	469.03	119999	192177	1452.48	34221.8	33173	942.51	65822.2	95801.4	584.73	42582.8	31567.4	162.87	78814.5	190673	5767.2	73436.2	43352.8	665.72	76232.2	121017	1769.32	59800.5	95800.5	1001.25	76486.5	105610	729.8	48372.8	42008	1915.28
1066	78864	99609.7	1209.51	108656	82241.3	1114.28	82350	116080	1363.48	44129.2	51533.7	482.38	69589.5	110346	861.52	52292.2	46902.1	650.59	53300.2	79631.9	1450.7	40554	31763.2	901.57	95956.5	146521	3542.2	74994.8	75254.8	3013.54	99054	98545.2	650.59	122174	79987	2087.05
1067	52954.5	48920.6	420.97	68416.5	55330.4	793.88	59470.5	65270.8	257.21	32859.8	30315.2	179.78	67350	77334.8	609.65	72965.2	51768.6	345.32	55872.8	68365.4	782.31	62315.2	42886.4	2069.25	175461	185663	2266.83	67690.5	50961.4	1455.15	123363	111978	922.93	44729.2	53322.6	566.04
1068	38688.8	44229.4	438.77	53983.5	42154.8	683.52	60708.8	70087.5	663.05	42793.5	47955.9	444.11	66669	100476	1153.44	73590	72791.3	275.9	69825	93620	332.86	99794.2	84942.5	2605.03	181408	262143	5966.56	113736	149772	1192.6	65099.2	51302.3	517.09	194367	255110	10766.3
1069	53346.8	60563.6	835.71	115264	83272	1658.96	76328.2	105118	479.71	75333.8	98215.9	1957.11	123703	175317	3046.47	104006	80262	1273.59	28917	25158.5	25.81	73305	56046.9	2366.51	52719	43614.4	318.62	73840.5	68872.6	1660.74	98429.2	116240	315.95	78056.2	85950.9	946.96
1070	121026	132736	4090.44	69072.8	50298.3	890.89	128462	202124	3743.34	35989.5	24288.1	219.83	70530.8	104479	655.04	48292.5	36694.7	1050.2	69839.2	74388	601.64	54678.8	32136.1	710.22	68002.5	92139	786.76	62616.8	42948.7	656.82	90761.2	164471	2433.26	76550.2	70538.7	1966.01
1071	27021.8	5628.36	0.89	43751.2	31770.3	447.67	52521.8	54169	290.14	37283.2	25249.3	256.32	145088	262143	8132.82	45039.8	26988.4	253.65	108050	183830	2877.37	111914	90403.5	1351.91	71313.8	98356.6	1421.33	78826.5	70229.9	2415.46	126190	195355	2065.69	78831.8	64393.3	809.01
1072	43044	51890.6	525.1	51400.5	32491.2	404.06	86130	142585	824.14	41225.2	38707.9	121.93	124226	177531	784.98	42097.5	23827.1	376.47	116835	135808	2130.66	85947	79770.7	1093.81	133209	153568	1668.75	101438	59840.9	647.03	67967.2	103601	440.55	149269	175846	687.08
1073	42993	48276.3	926.49	136970	92614.3	1566.4	64812	55431	763.62	64296.8	104964	1889.47	93763.5	179460	1204.17	63200.2	43494.3	848.17	28948.5	24796.3	53.4	77240.2	54967.3	1445.36	38113.5	47943.4	105.91	223204	190750	2720.73	194497	262143	6262.93	110492	119843	311.5
1074	43722	48101.8	1158.78	48789.8	37172.6	475.26	127463	147849	903.35	35732.2	45604.5	437.88	82484.2	132193	1206.84	90552	56722.4	1785.34	58670.2	98054	628.34	89940.8	116844	3279.65	96207.8	180350	2876.48	121114	92757.6	2257.93	134690	185391	1335	27869.2	27525	147.74
1075	69882.8	89896.2	953.19	71540.2	59088	939.84	82665	116144	2782.14	59079	61807.8	3729.99	54060	90666.1	1310.08	117782	74738.6	1739.06	40140	44006.1	420.08	71960.2	64510.8	3536.86	90070.5	131204	893.56	72364.5	65558.3	889.11	99951.8	187468	4613.76	140512	160244	2077.26
1076	56700	47658.6	627.45	79682.2	68615.4	1087.58	81089.2	94278.6	292.81	53075.2	66836.3	981.67	98700	225733	356.89	48771	35826.1	664.83	40011.8	33571.7	488.61	41063.2	27015.1	139.73	66750.8	88968	581.17	66480.8	66549.8	2152.02	134027	225220	5411.2	71693.2	65516.5	1830.73
1077	47458.5	64455.6	316.84	55683.8	40062.5	574.05	76728.8	128916	696.87	70572.8	90974.9	842.83	81656.2	118685	1124.07	111095	84294.6	1282.49	184037	115813	1897.48	197102	262143	15142.5	52987.5	62491.3	605.2	45659.2	42105.9	3122.12	59562	87320.6	1529.02	93822	89264.3	1175.69
1078	54603	65253	704.88	43190.2	30382.8	700.43	63978.8	82808.3	453.01	40815	37309.7	158.42	71715	90108	601.64	76704.8	56963.6	1566.4	78091.5	86718.9	911.36	124013	94637.3	1276.26	78932.2	125375	1208.62	85444.5	86471.5	988.79	84523.5	136621	1104.49	69498	77154.1	905.13
1079	33672.8	36637.7	345.32	41100.8	29734.9	396.94	120975	153839	1526.35	39625.5	36085.9	69.42	54104.2	66912	363.12	54159.8	36150.9	679.07	95415	139758	5678.2	262143	262143	13745.2	97089	124131	3227.14	68429.2	65927.6	1039.52	121862	189163	1605.56	70424.2	68201.6	1313.64
1080	46497	55192.5	33.82	58436.2	46470.5	455.68	83222.2	133935	1348.35	43012.5	43365.2	376.47	65539.5	86724.3	748.49	43841.2	25001	526.88	38422.5	33990.9	898.9	76810.5	61514.1	890.89	188038	261582	2091.5	56370.8	59400.4	1373.27	137449	150787	1013.71	105563	109797	1494.31
1081	36822.8	33700.7	389.82	40707	25741.5	222.5	84232.5	121787	857.96	66024	83415.2	965.65	62484.8	91832	574.94	41681.2	36465.1	978.11	56011.5	64633.6	1012.82	123113	127229	1787.12	64653.8	91178.7	1124.07	71273.2	92805.6	729.8	124088	217537	1405.31	141831	123452	7621.07
1082	52033.5	52327.6	537.56	51652.5	39515.1	587.4	54760.5	54948.6	359.56	70481.2	90158.8	1520.12	92194.5	132660	734.25	44251.5	29907.6	1011.04	47117.2	78792.6	490.39	60573	30871.4	235.85	125232	152202	1191.71	95652.8	75935.7	1251.34	66371.2	87015.3	1019.05	61103.2	51801.6	620.33
1083	45903.8	64888.1	469.92	67397.2	45641.9	979.89	102402	142909	506.41	48713.2	54145.8	1113.39	68657.2	105180	719.12	84042.8	64573.1	1228.2	34557.8	31470.4	590.96	97389	74580.2	1727.49	76638	110009	836.6	68882.2	61070.9	761.84	58881	76773.2	742.26	134506	129648	3365.09
1084	39858	33144.5	733.36	39123.8	30763.7	330.19	134721	157195	2095.95	61802.2	80321.6	1175.69	87341.2	124028	774.3	104213	95705.3	979	61801.5	62478.9	691.53	142807	107726	698.65	180391	262143	7995.76	99715.5	93557.7	1545.04	119609	191067	1563.73	80879.2	71592.5	1523.68
1085	143506	210097	2562.31	79912.5	76038.9	1522.79	61602	75634.9	966.54	60180.8	58327.9	125.49	92044.5	156493	1097.37	48818.2	37773.4	614.99	36693	44034.5	461.02	53239.5	53734.6	733.36	86090.2	196751	1411.54	99022.5	69714.6	1401.75	132122	135615	2014.07	90317.2	74118.3	2155.58
1086	40870.5	43776.4	506.41	102260	111606	2152.02	74247	98015.7	824.14	153244	197751	2378.97	90356.2	123776	357.78	49751.2	40754	355.11	52542.8	63183.8	1005.7	67486.5	67899.9	1686.55	101968	146639	1872.56	135430	109528	1586.87	72243.8	85868.1	1377.72	75832.5	55376.7	1342.12
1087	66606.8	81459.9	1480.96	56598	40996.1	436.99	56373.8	64567.7	1120.51	32561.2	43714.1	391.6	56133.8	78088.6	567.82	39738.8	29179.5	636.35	101264	114890	1582.42	53764.5	47152.2	702.21	124085	150008	1055.54	97164	110060	606.98	81319.5	132699	1495.2	123118	137131	2794.6
1088	51711.8	57133.6	274.12	49208.2	34727.8	663.94	115522	143952	1029.73	34457.2	32056.9	461.91	143521	228176	555.36	71828.2	51286.2	1540.59	57626.2	68109	873.98	73701	65164	1492.53	57810	60152.4	838.38	55334.2	58797	734.25	57460.5	60277.9	1134.75	40419	33809.3	241.19
1089	72220.5	92603.6	465.47	41161.5	34395.8	653.26	70023.8	105566	1065.33	44804.2	53278.1	538.45	55323	57262.6	237.63	78711.8	66515	904.24	38713.5	46683.2	434.32	67978.5	81726	3504.82	219574	220330	3084.74	107330	96694.9	1147.21	131697	243703	825.03	72385.5	44769.7	310.61
1090	39281.2	46668.9	402.28	60171.8	53822.8	664.83	96989.2	140364	567.82	41943.8	28254.8	713.78	52032.8	40589.3	474.37	52448.2	41774.8	842.83	37727.2	35891.9	484.16	78668.2	105268	650.59	74818.5	111677	806.34	53062.5	45203.1	613.21	74020.5	105000	829.48	124827	120114	2170.71
1091	71976	85894.8	931.83	82302	83269.3	3752.24	65638.5	96520.5	999.47	63894.8	71222.2	663.05	64375.5	88183	1054.65	47023.5	27213.5	420.97	35276.2	38142.7	871.31	101385	73024.5	4991.12	94664.2	121651	1741.73	58524	40353.5	1270.92	64305	85956.2	353.33	84114	82876.8	1066.22
1092	35876.2	33223.7	395.16	52815.8	29904	347.99	61050.8	45121.2	387.15	34651.5	29158.2	399.61	80022.8	113376	166.43	53037.8	38800.4	922.93	61428	66420.7	825.03	68964.8	44873.8	846.39	99705	102173	872.2	62796.8	60838.6	795.66	66309.8	99008.9	851.73	169109	121238	1982.03
1093	34851.8	27491.2	199.36	60107.2	47251.9	484.16	101614	137118	968.32	47545.5	55371.3	1070.67	57692.2	66762.5	377.36	40858.5	31819.3	364.9	39619.5	32126.3	476.15	80136	100406	1690.11	63213.8	90636.7	2286.41	93159.8	45738	362.23	50299.5	30755.7	165.54	155665	158910	22925.5
1094	30284.2	32327.5	314.17	97365.8	89407.6	1405.31	108890	116384	924.71	35120.2	35399.8	469.92	121108	156697	1067.11	112744	89534	1247.78	34158.8	36656.4	368.46	44375.2	36149.1	1256.68	69594.8	86469.7	489.5	48076.5	30582.2	269.67	135042	223004	3427.39	101841	94695.1	838.38
1095	56779.5	70423.9	2098.62	91742.2	61831	932.72	82430.2	115040	737.81	43971.8	28767.5	986.12	61435.5	48397.3	131.72	88506.8	45439.8	610.54	52230	112346	2339.81	35747.2	39148.4	1373.27	71353.5	88512.3	2400.33	71659.5	34527.6	855.29	99849.8	158464	1522.79	211442	206252	9997.37
1096	47443.5	46272.9	584.73	42264	28353.6	674.62	72076.5	99919.4	1280.71	41334.8	30669.4	253.65	72361.5	114262	2442.16	44652.8	27593.6	51.62	115214	151859	644.36	109036	80132	1050.2	108026	109886	4246.19	118012	127942	18124.8	126144	214252	2967.26	184016	137861	10573.2
1097	33644.2	30481.6	258.99	54054.8	46651.1	365.79	82569	106140	994.13	61003.5	68382.3	643.47	108194	123136	997.69	49446.8	35034	1097.37	50883.8	65541.4	901.57	63435.8	59391.5	1058.21	51772.5	64304.3	467.25	123352	92942.7	1513	64837.5	88970.6	403.17	199170	154705	3985.42
1098	94741.5	123983	4765.95	48918	35276	594.52	56558.2	56658.3	372.91	45299.2	59357.7	652.37	105380	132638	1369.71	53380.5	45902.6	1718.59	83917.5	78403.7	342.65	75079.5	72922.1	359.56	75267	128934	6424.02	71291.2	62789.5	433.43	146890	195407	2082.6	95787	104188	773.41
1099	41201.2	39965.4	347.1	64600.5	42955	709.33	72964.5	88363.6	934.5	39429.8	19978.7	303.49	69010.5	103055	393.38	96529.5	69471.6	1082.24	50093.2	74370.2	597.19	125650	103218	5419.21	62499.8	80003	181.56	51582	30996	367.57	70856.2	83448.2	1157.89	129303	161238	8993.45
1100	67851.8	81604.1	2427.03	46511.2	34184	177.11	70489.5	80791.5	634.57	50191.5	65767.4	707.55	71902.5	100475	1046.64	94563	76647.7	1051.09	35939.2	27759.1	460.13	54471.8	36521.1	1185.48	262143	262143	9120.72	72635.2	68323.5	479.71	100009	99938.1	3001.08	71269.5	58811.2	1221.08
1101	53872.5	62607.9	801	226384	156364	1027.06	78229.5	113897	1017.27	35310	24958.3	303.49	126585	145687	2390.54	57205.5	45058	1103.6	38127.8	17959.3	69.42	167748	186692	1043.08	71335.5	78474	640.8	90375.8	112051	5642.6	111456	198207	1541.48	79387.5	73723.1	1584.2
1102	64251	70612.6	509.08	53211	51610.2	391.6	62957.2	74230.4	350.66	35439.8	34985.9	227.84	114972	201023	1607.34	74145	58378.7	2895.17	41406	44116.4	412.96	40482	31085	68.53	172322	246305	1560.17	179290	170118	2522.26	117217	200158	2087.05	63777.8	51512.3	573.16
1103	38633.2	43535.2	186.9	43883.2	36191	328.41	68774.2	99400.5	931.83	37868.2	33311.8	80.99	90676.5	143945	789.43	84770.2	98168.8	1132.08	56717.2	64169.9	1452.48	262143	262143	10783.2	99059.2	199500	5906.04	106132	137331	6087.6	44057.2	50557.3	280.35	132093	118623	3020.66
1104	51102	50970.3	439.66	65688.8	56297.8	705.77	107903	118881	1013.71	120353	97770.1	1098.26	62778.8	80292.2	768.07	45126	31926.1	836.6	42230.2	50524.4	670.17	82874.2	75340.3	2115.53	178601	222971	4894.11	78926.2	55390	785.87	89372.2	105460	1661.63	85242	120833	4003.22
1105	36046.5	33350.1	637.24	62365.5	57763.7	510.86	19615.5	57583	3958.72	71463	103499	1383.06	159496	206044	4491.83	42236.2	27777.8	881.1	86824.5	92153.3	946.96	106462	64880.1	1654.51	101816	201477	968.32	48585.8	43463.1	1755.97	86226.8	126301	1062.66	67531.5	51956.4	889.11
1106	42364.5	57706.7	893.56	59697.8	43893	695.98	89684.2	116622	1528.13	43222.5	36574.6	563.37	123335	164126	1481.85	47448	30767.3	412.96	35111.2	32688.8	1062.66	40185	34296.1	1015.49	132314	70708.7	2382.53	107200	95691.9	6262.04	81547.5	102957	1339.45	91128.8	85065.3	925.6
1107	36072.8	35538.6	427.2	52722.8	36360.1	475.26	92566.5	136668	730.69	33141.8	34082.6	529.55	75537	81183.1	559.81	68334.8	48505.9	946.07	47622.8	59057.7	645.25	76497	46970.6	1132.97	151675	192599	2825.75	251630	262143	7005.19	95698.5	151040	2969.93	76606.5	89348	926.49
1108	78891.8	92333	963.87	43309.5	38285.1	385.37	76919.2	93018.4	471.7	36033.8	37640.8	281.24	234485	262143	3624.97	69341.2	66552.4	819.69	76090.5	120202	1395.52	76836.8	49996.6	4836.26	77568	105232	834.82	179020	147884	3807.42	111628	118415	2556.08	71955	64719.9	383.59
1109	61423.5	58212.2	753.83	44501.2	31134.9	330.19	116537	164589	2438.6	38352	24631.6	82.77	73172.2	94827.7	420.08	53112	44683.3	601.64	47160.8	51416.2	1319.87	86892	103593	1023.5	74403.8	73559.4	2136.89	73702.5	61356.6	950.52	112057	122932	831.26	104057	99850	1428.45
1110	35757	41192.8	560.7	46401.8	23588.6	311.5	108644	135747	1214.85	33482.2	29028.2	224.28	91148.2	124063	1616.24	234625	209793	10249.2	42958.5	49699.4	494.84	159864	156017	7233.92	135679	172798	1190.82	105944	122941	728.91	224054	262143	1076.01	96052.5	115726	4655.59
1111	34500.8	26466.8	354.22	63678.8	46003.2	508.19	192531	262143	2688.69	48707.2	63992.8	518.87	189511	253091	1674.09	75417	74256.3	860.63	88920	109202	1713.25	59991	70653.5	381.81	101912	230262	1402.64	123113	101616	818.8	86931	161017	1231.76	58697.2	71076.3	1789.79
1112	74397	81954.8	771.63	55515	41671.6	469.92	49266	49206.3	347.1	55191.8	54694.1	466.36	67080	71267.6	3637.43	40413.8	33029.7	399.61	38917.5	38895.7	1627.81	143656	73920.7	3195.99	67902	68692.9	788.54	161490	136797	2610.37	62445	94526	820.58	91060.5	63630.6	878.43
1113	66828.8	70018.1	1328.77	58727.2	54107.6	166.43	83371.5	118252	708.44	59226	86801.7	3286.77	91695.8	137765	1816.49	55218	49089.7	2171.6	35453.2	30447.8	641.69	94512.8	88788.2	1231.76	107205	110714	1475.62	115598	127654	1747.96	103373	104652	752.94	81424.5	64752.8	3281.43
1114	58383.8	65221	895.34	58091.2	42800.1	418.3	79119	117158	1030.62	39486	26431.2	347.1	61357.5	71737.6	595.41	48045	35799.4	511.75	55460.2	85064.4	1691.89	75725.2	48611.8	508.19	78196.5	102415	3325.93	66313.5	63275.4	1449.81	98868.8	170890	2822.19	55669.5	56191.9	515.31
1115	53972.2	66580	194.02	86263.5	65098.2	2693.14	58031.2	78565.6	513.53	51406.5	66270.3	1100.93	200944	262143	14951.1	42722.2	36137.6	720.01	112378	188872	4551.46	160268	124454	1919.73	75852.8	180666	1148.1	51680.2	42298.1	234.96	91587	129893	883.77	50057.2	42537.6	349.77
1116	52464	39807.9	1232.65	40646.2	26013.8	283.91	70632	84144.2	877.54	48378.8	48969.6	378.25	69078.8	103934	580.28	75608.2	55018	883.77	39219.8	44933.4	104.13	43246.5	36695.6	590.96	82885.5	110861	1911.72	142151	132425	1428.45	98499	135435	1230.87	41097.8	43895.7	236.74
1117	35283	18269	302.6	63312	50980.1	643.47	42380.2	45168.4	315.95	57680.2	67866.1	708.44	97481.2	170295	1150.77	45032.2	27449.4	790.32	78694.5	96314.9	1011.04	53370.8	46683.2	134.39	97983.8	71192	999.47	77733.8	57826.9	1684.77	54135.8	62342.7	1171.24	96113.2	90715	1246.89
1118	34697.2	35526.1	391.6	68796	52951.4	890	61832.2	63014.7	528.66	53494.5	50204.9	725.35	67351.5	104585	629.23	67213.5	66963.6	991.46	100736	177589	5967.45	126862	102346	1320.76	65348.2	111312	800.11	127774	150173	2119.98	105796	149561	1108.94	176626	250800	662.16
1119	33444.8	32786.7	755.61	67211.2	52659.5	1222.86	61758	84465.4	1225.53	38191.5	38116	32.04	93969	131163	814.35	66501.8	47507.3	654.15	41274	43200.6	120.15	44709	38172.1	448.56	60789.8	52499.3	1100.04	41592.8	36202.5	404.06	74690.2	101726	1001.25	161037	242234	1733.72
1120	80066.2	109970	879.32	49774.5	35841.2	509.08	83005.5	107547	774.3	109992	98464.3	2176.05	80730	209687	1259.35	90408.8	79686.1	863.3	42055.5	43806.7	639.02	139234	128695	1338.56	68973.8	133358	840.16	71552.2	56605.8	632.79	114745	192287	1051.09	59992.5	52400.5	776.97
1121	40080.8	44756.3	1009.26	60470.2	48102.7	889.11	64937.2	101892	216.27	116594	168377	2764.34	73415.2	103824	884.66	66020.2	46955.5	721.79	110919	153257	1921.51	110200	104020	1471.17	262143	262143	8969.42	89100.8	84517.1	585.62	128413	194979	8638.34	58428	42409.4	24.92
1122	56458.5	32790.3	884.66	48020.2	32798.3	445.89	112462	186181	1408.87	61460.2	77139	660.38	71193	93619.1	1004.81	98406.8	115324	5190.48	64365	74502.8	1618.02	149476	97195.1	5752.07	83099.2	109301	991.46	55139.2	47370.2	624.78	106310	164243	905.13	42927.8	53682.1	317.73
1123	32502.8	31983.9	306.16	41938.5	24964.5	445.89	66154.5	92814.5	490.39	73240.5	80850.3	1242.44	76164.8	96850.7	566.04	42414.8	26237.2	288.36	41955.8	43470.3	1275.37	120177	102229	1344.79	55491	54251.7	92.56	76250.2	79285.6	396.05	80118.8	117310	835.71	124061	106093	9831.83
1124	44645.2	51805.1	497.51	58203	43402.6	1003.92	60679.5	77143.4	1717.7	37254.8	41567.4	453.01	164297	216500	2634.4	45577.5	42284.8	483.27	68534.2	79930	2234.79	83866.5	69036.4	871.31	49227.8	46636	67.64	75780.8	69689.7	607.87	105408	140753	1260.24	101159	84855.3	1160.56
1125	39917.2	45457.6	404.95	95007.8	75957	1329.66	73937.2	103822	1218.41	48315	57049	689.75	51563.2	118735	753.83	46869.8	35477.2	1698.12	46131	81786.5	706.66	128958	104314	1753.3	58653	65355.4	350.66	101935	90105.4	2544.51	46156.5	53753.3	1037.74	78989.2	77965.8	7100.42
1126	36087.8	36113.5	343.54	64402.5	37107.7	695.09	147847	201849	1689.22	35634.8	27054.2	192.24	109802	167029	2740.31	84005.2	77870.5	900.68	36654	32170.8	330.19	81537.8	85797.8	1634.04	262143	262143	2797.27	46277.2	54004.3	1135.64	118918	219531	1289.61	66587.2	40507.5	532.22
1127	37773	39273	1349.24	72886.5	69391.5	828.59	75488.2	108185	797.44	46579.5	55501.3	542.9	252525	262143	3090.97	52159.5	49829.3	1817.38	46223.2	34362	242.08	51953.2	50482.6	552.69	159195	230053	9549.7	182025	201064	14014.8	133760	131845	5526.9	142756	137196	1179.25
1128	32662.5	34110.1	349.77	72315	63867.3	944.29	99414	137119	2625.5	33852.8	38456	1252.23	100179	166037	1371.49	45481.5	31190	466.36	80129.2	103373	4595.07	81165	64195.7	283.91	97508.2	124628	1171.24	82645.5	79243.8	1261.13	123274	210021	4073.53	80616	73537.1	1392.85
1129	43522.5	48628.7	641.69	42734.2	28636.6	271.45	60695.2	80172.1	589.18	35726.2	29168	62.3	97986.8	120616	1030.62	58473.8	46738.3	926.49	41760.8	55651.7	641.69	210186	262143	5451.25	109808	179978	3486.13	93360.8	104460	952.3	121357	214592	3115	50330.2	52107.7	505.52
1130	36552	33812.9	717.34	67580.2	52976.4	659.49	67425	95917.1	1453.37	95538.8	106831	1201.5	92757.8	145864	812.57	52376.2	39296.2	672.84	50517	51370.8	883.77	81893.2	66238.2	1270.03	58352.2	71975.2	749.38	80372.2	77009	1832.51	137910	249267	1539.7	54981.8	49480.4	586.51
1131	37312.5	33605.5	449.45	60051.8	61869.2	2995.74	89540.2	144022	1229.98	35155.5	39662.8	638.13	50333.2	54896.1	140.62	68976.8	73481.1	820.58	41993.2	60821.7	387.15	138811	150476	3749.57	127967	165121	3495.92	64673.2	69671.9	630.12	52299.8	64078.2	942.51	133425	190427	11442.7
1132	48348.8	64906.8	744.04	64580.2	60590.3	974.55	53416.5	59907.7	772.52	62633.2	75735.4	1299.4	67866	90108	618.55	70695.8	51361.9	1204.17	45632.2	52081.9	542.9	108569	122401	873.09	166174	219794	5145.98	82554.8	74825.9	335.53	77897.2	117334	2092.39	44521.5	34565.8	479.71
1133	58134.8	82479	858.85	81090.8	66268.5	1460.49	62620.5	76334.4	337.31	45534.8	16973.2	97.9	102019	155058	1335.89	59760.8	46716.1	911.36	48096	40631.2	1612.68	69869.2	68786.3	901.57	150609	181374	2370.96	51441.8	59759.1	609.65	59246.2	74174.4	1454.26	72927	59729.7	1280.71
1134	35960.2	30679.2	329.3	48731.2	27595.3	1003.03	65929.5	93922.6	194.91	83823.8	120805	1107.16	90547.5	133508	928.27	154028	159425	3579.58	40825.5	35673	436.99	39031.5	39682.4	641.69	114890	147747	1249.56	75271.5	75279.8	1512.11	125345	230384	3776.27	87729.8	84220.7	1731.05
1135	98127.8	76108.4	801.89	66473.2	46898.6	654.15	55395.8	54055.9	308.83	37584	31813	410.29	126200	209554	2312.22	64340.2	48438.2	1318.09	33305.2	35324.1	711.11	67427.2	50740.7	688.86	94686.8	165099	982.56	90594.8	76101.2	1255.79	111069	184389	1913.5	131288	101823	1578.86
1136	80417.2	131011	1769.32	47755.5	27770.7	372.02	58150.5	78296	206.48	63821.2	77802	1366.15	86469	136815	847.28	145807	117240	4107.35	36951	30688.1	287.47	69012	51866.5	688.86	70662	76360.2	574.94	115749	103456	582.06	87677.2	124453	1592.21	54187.5	47400.5	159.31
1137	42206.2	45550.2	1461.38	44865	31276.4	352.44	55264.5	41195.4	773.41	40120.5	24801.6	443.22	170028	254358	1466.72	110098	88287.1	1220.19	50110.5	59987.8	1262.02	64181.2	72761.9	687.08	150710	213049	6268.27	55649.2	38950.8	1135.64	93560.2	116399	826.81	57223.5	39759	686.19
1138	33081	35661.4	97.9	69021	48700.8	134.39	65859	84550.9	550.02	43972.5	48476.5	175.33	76327.5	75338.5	2249.92	68091.8	45871.5	814.35	51768.8	67063.3	479.71	52711.5	49077.3	1935.75	47994.8	63868.2	559.81	56020.5	37937.1	592.74	146476	167534	1848.53	51174.8	21472.1	1173.02
1139	47962.5	57746.8	484.16	146289	143424	2168.04	95494.5	153290	1088.47	41560.5	29717.1	280.35	70722	109311	222.5	64530	58884.2	935.39	40859.2	43058.2	712.89	45385.5	38463.1	194.02	131476	188615	1257.57	61623.8	95188.2	957.64	59228.2	62162.1	736.92	66594.8	54347	1359.03
1140	37198.5	47326.6	477.04	87176.2	57790.4	766.29	68019	89348	629.23	42081	45175.5	598.97	219987	262143	3050.92	48346.5	42414.7	478.82	41722.5	45947.1	517.09	82023.8	80375	399.61	109302	116740	323.07	92452.5	77096.2	4675.17	71179.5	90996.3	771.63	156736	74531.3	1173.91
1141	77199.8	81680.6	1691.89	53024.2	43108	500.18	172142	166051	1324.32	46401.8	53069.8	492.17	57692.2	70666	212.71	43048.5	28132.9	914.03	72603.8	144804	1819.16	82014.8	58636.8	401.39	99260.2	199785	1754.19	59695.5	43859.2	744.04	72130.5	154007	1031.51	53850	45887.5	1234.43
1142	41548.5	45180.8	767.18	75330	65986.4	1050.2	61314.8	73400.1	1110.72	48219.8	38591.3	541.12	91898.2	167281	1172.13	144507	128812	1794.24	34545	39926.3	661.27	75873.8	88233.7	275.01	93346.5	126319	1471.17	155230	186642	4709.88	59058	64921.1	493.06	118430	102920	4617.32
1143	18730.5	148195	1721.26	57198	41976.8	480.6	57561	71365.5	414.74	51087.8	66871.9	522.43	103946	184821	785.87	49232.2	32169	719.12	67659	96340.7	1488.08	33391.5	46347.6	687.97	64375.5	71622.8	497.51	229068	252660	12393.2	54048.8	104433	851.73	262143	262143	13451.5
1144	34237.5	33534.3	383.59	50281.5	28288.7	43.61	82663.5	92412.3	1464.05	95725.5	78110	979	56920.5	84235.8	944.29	68349.8	48941.1	967.43	37592.2	38723.9	342.65	68303.2	58939.4	671.95	37212.8	33942.8	362.23	185452	257401	2425.25	100599	120204	2432.37	98478	132755	8309.93
1145	48926.2	68846.8	544.68	188062	167458	4521.2	94318.5	110418	922.93	37419	49046.1	1480.96	60646.5	76459.9	727.13	72155.2	77670.3	1602.89	91392	137585	2316.67	65961	53006.6	473.48	228631	262143	8555.57	90459.8	78916.3	2885.38	107756	110780	1676.76	58068.8	90496.1	541.12
1146	36185.2	42790.3	1344.79	71844.8	64178.8	1440.02	103268	163906	4220.38	134921	140834	1434.68	60306.8	64069.3	347.99	78038.2	56853.2	1070.67	99720	174121	7423.49	86853	91313.1	1462.27	112134	120333	850.84	54349.5	42015.1	543.79	51802.5	68918.9	639.91	116777	80862.7	4120.7
1147	59940.8	58826.3	1442.69	63004.5	44031	2386.98	81063	97472.8	1103.6	46236	55898.2	476.15	68584.5	99712.9	1080.46	58404	43230.9	584.73	37294.5	43700.8	464.58	66645	58930.5	768.07	151928	191691	750.27	61684.5	56680.5	1487.19	86802	167948	985.23	59118.8	60069.7	411.18
1148	36996.8	25498.5	287.47	72546	49315.8	821.47	111699	187676	1344.79	46644.8	65559.2	210.93	94872.8	131924	1307.41	94320.8	64663.8	1157	84232.5	84202.9	2656.65	77111.2	82331.2	2213.43	98273.2	123366	1614.46	79750.5	79597.1	1190.82	79444.5	137689	1314.53	49699.5	41139.4	469.03
1149	42076.5	61161.7	2159.14	50359.5	36426.8	535.78	100368	161426	1257.57	55810.5	66735.8	668.39	110747	138165	1241.55	74299.5	62508.3	1873.45	48918.8	48473	793.88	119556	115817	5315.08	128812	148690	962.09	80099.2	107556	522.43	93942	120081	890	68121	74937.1	1117.84
1150	113011	95083.1	1121.4	118748	100292	1351.02	60316.5	79047.1	501.07	69035.2	70739.9	417.41	57081	69510.8	332.86	66270	46605.7	643.47	55152.8	71216.9	830.37	132422	262143	1995.38	78122.2	107493	4999.13	77070.8	64250	2436.82	87045.8	115044	1045.75	107853	128867	1467.61
1151	36962.2	40654.3	2677.12	70464.8	49095.1	723.57	229219	262143	10059.7	37996.5	37890.9	559.81	56778.8	70768.4	304.38	93101.2	72547.5	2062.13	36940.5	32828.5	796.55	72043.5	49048.8	813.46	104151	89164.6	817.02	42093	36720.5	640.8	83057.2	118943	1601.11	262143	249722	4114.47
1152	70652.2	68618.1	900.68	50606.2	37722.6	634.57	79884.8	112519	1465.83	47745	73477.5	632.79	130717	178855	1833.4	62822.2	58052	1448.03	45046.5	45230.7	1097.37	109160	83907.4	1343.9	64419.8	85056.4	760.06	36204	39846.2	783.2	191470	262143	3366.87	60289.5	42807.2	1192.6
1153	45637.5	59599.7	1172.13	56039.2	50943.6	218.94	116704	100555	2161.81	45477.8	50596.5	534.89	65931.8	85874.3	1183.7	47499	41838.9	506.41	67666.5	96710.1	1796.02	76375.5	41940.4	1035.96	60342	82555.5	1610.01	120497	126934	2294.42	166456	262143	11180.2	136424	106716	1488.97
1154	43372.5	54783.9	469.03	93049.5	50297.5	1409.76	79641	114512	921.15	53944.5	76159.1	1071.56	124555	207932	1276.26	73338.8	44689.6	1456.93	73937.2	119636	6519.25	167214	187621	2758.11	53190	52791.2	346.21	65537.2	74737.8	989.68	169310	240668	3343.73	90274.5	98878.1	453.9
1155	48520.5	44843.5	195.8	39512.2	29232	285.69	62496.8	75768.4	1595.77	113106	146494	1284.27	106588	128148	1178.36	74472.8	63510.4	942.51	47286.8	54253.5	548.24	107087	89827.7	1322.54	131522	193498	2060.35	54756.8	33578.8	139.73	73589.2	56227.5	195.8	132213	133208	1302.96
1156	38043.8	21319.1	636.35	63126.8	50770.9	922.93	126697	196575	2021.19	48711.8	52587.4	333.75	43818.8	56463.4	889.11	74385.8	47291.9	685.3	54396.8	61702.8	617.66	95116.5	88666.2	1197.94	55008	84096.1	1171.24	87805.5	94650.6	1255.79	124006	165044	3402.47	128969	95600.2	1462.27
1157	50643.8	53813.8	704.88	66063	45488.8	1175.69	88620	122015	591.85	41805.8	46717.9	404.06	187009	262143	720.9	74568.8	75926.8	2040.77	65296.5	80271.8	1367.04	51366.8	53445.4	3752.24	113187	181831	4219.49	68692.5	52278.6	586.51	84168	121204	5596.32	61131	45270.7	416.52
1158	37070.2	26472.2	406.73	75578.2	59099.6	1854.76	60002.2	76029.1	580.28	54354	61602.2	690.64	145274	149371	1246.89	93417	98915.5	2686.02	64828.5	72428.2	840.16	137555	87932.9	2799.05	101486	169948	790.32	44475.8	55807.4	1783.56	132098	189599	1363.48	57071.2	48481	584.73
1159	35645.2	34675.3	340.87	57546	54881.8	660.38	100306	110694	718.23	37596	29556.9	94.34	97106.2	158797	1001.25	57126	33444.4	636.35	38857.5	30708.6	284.8	210708	260621	3766.48	94752.8	159112	3520.84	47364.8	41951.9	970.99	53941.5	58435.6	923.82	142475	124711	1491.64
1160	49112.2	45248.5	1337.67	89458.5	55053.6	1076.9	51908.2	56002.4	218.05	36447	17457.3	411.18	107056	139499	893.56	93358.5	109069	3443.41	49587	67070.4	1120.51	55010.2	49577.4	1896.59	77661.8	87246.7	1165.01	53122.5	45757.6	32.93	172507	187319	1358.14	85529.2	68531.8	2298.87
1161	75489	92188	740.48	44598	33142.7	495.73	86606.2	113555	1175.69	44261.2	20543.9	1097.37	88463.2	123835	1026.17	59412	46979.5	1084.91	53556	65148.9	590.96	75501.8	49590.8	1291.39	60174.8	78276.4	510.86	74035.5	62566.1	304.38	74142	105081	913.14	44459.2	27704.8	325.74
1162	36105	42730.7	804.56	193544	116431	1712.36	58592.2	87596.5	316.84	41772	34177.8	825.92	82532.2	107579	799.22	69655.5	39843.5	749.38	66242.2	97398.9	2888.94	38485.5	37353.3	1025.28	97250.2	138860	388.04	60854.2	56052.2	1115.17	116926	131149	908.69	61332	66362	621.22
1163	30320.2	24154.6	201.14	63138.8	44558.7	817.02	117510	165617	2280.18	54336.8	76803.4	639.91	106950	159131	2326.46	126536	84103.2	563.37	45807	67395.2	567.82	42958.5	31061.9	474.37	57854.2	54646.9	736.92	74465.2	80574.4	1890.36	71187.8	87280.5	425.42	82608.8	87068.7	829.48
1164	40399.5	48382.2	760.95	110897	75242.4	695.09	63123.8	91074.6	907.8	59214.8	77880.3	660.38	60822.8	83136.7	728.02	89808.8	79609.6	2583.67	39293.2	47801	316.84	54793.5	47983.5	346.21	71633.2	119219	773.41	84378.8	58003.1	669.28	77720.2	100335	1537.03	84219.8	81159.1	1238.88
1165	95450.2	149112	1290.5	47058	24543.5	163.76	56514	70164.9	450.34	37769.2	23828	302.6	77255.2	102964	520.65	78138.8	54547.2	1925.07	43722.8	50656.1	269.67	73739.2	71000.6	768.96	139103	240375	593.63	55944.8	61139.4	0.89	99528	122257	483.27	105370	59333.6	884.66
1166	35970.8	31327.1	250.98	43197	25939.9	570.49	54072.8	48304.8	243.86	38898.8	50520	453.9	106042	135676	443.22	42582	30664.1	603.42	81807	91307.8	1569.96	139542	118354	1658.96	262143	262143	9479.39	72843	53971.4	181.56	96744.8	180504	1391.07	40602.8	30897.2	186.01
1167	45533.2	52439.7	492.17	64182	52467.3	600.75	82350.8	155013	1680.32	49644	58692.8	1436.46	138340	230747	7041.68	77343.8	68631.5	930.94	76055.2	87646.3	867.75	39088.5	28888.5	179.78	130043	188660	2972.6	47590.5	45324.1	268.78	117740	167053	1781.78	54005.2	55693.5	429.87
1168	41315.2	54163.6	978.11	65988.8	38756.8	761.84	60524.2	71628.1	614.1	46636.5	48371.5	515.31	68505.8	98539	408.51	262143	235320	3679.26	47418.8	54917.4	970.99	87074.2	61202.6	2189.4	74116.5	97592.9	906.91	45196.5	42348.9	436.99	115892	153614	630.12	102906	121207	683.52
1169	46757.2	57089.9	458.35	50889.8	37710.2	536.67	62628	79347.1	572.27	62594.2	85261.1	1869.89	48820.5	43325.2	293.7	88724.2	79660.3	989.68	65440.5	89847.3	752.05	121598	126053	5362.25	41901.8	49346.9	312.39	66681	123312	914.92	54012.8	86533.8	942.51	54843	66453.6	497.51
1170	44832.8	45937.3	444.11	58260	40074.9	578.5	91573.5	121877	964.76	47562.8	64383.5	183.34	89983.5	121021	769.85	47158.5	39585.4	635.46	91020.8	221036	1824.5	66146.2	52250.1	608.76	119770	192296	1734.61	40235.2	34526.7	440.55	117362	140909	1154.33	75192.8	76427	866.86
1171	42695.2	41795.3	515.31	117230	140136	2395.88	59508.8	55610.8	265.22	49841.2	92827	1237.1	93891	110709	969.21	43527.8	31635.9	939.84	47481	50810.1	307.94	162858	148985	4636.01	132012	205109	4364.56	262143	262143	2827.53	195625	262143	2549.85	51042.8	53299.4	3633.87
1172	45048	51246.2	426.31	102475	67466.4	3991.65	38623.5	32228.7	173.55	53354.2	52900.7	479.71	55494.8	67463.8	549.13	66069	51905.7	943.4	41973.8	44653.1	448.56	71651.2	82587.5	1238.88	121855	187292	1885.02	122075	134636	1753.3	60467.2	82069.6	645.25	87582	66785.6	2245.47
1173	55584.8	53416.9	652.37	123358	94508.2	2180.5	88585.5	107322	877.54	56904.8	100608	930.05	93018.8	138190	603.42	50166.8	37826.8	692.42	60575.2	78602.1	2087.94	95694	95027.1	3404.25	84581.2	108834	1246	89348.2	76576.5	664.83	148262	178554	2310.44	59343.8	55771	547.35
1174	36288.8	31222.1	499.29	61594.5	42946.9	558.03	61868.2	75759.5	534.89	73233.8	83150	937.17	49249.5	67636.4	487.72	51597	38771.1	352.44	56037.8	53340.4	595.41	187197	196144	14002.4	58955.2	71017.5	533.11	170522	140735	1928.63	52483.5	40414	139.73	139378	152285	3940.03
1175	56742.8	68820.1	1086.69	79344.8	68530	1627.81	68626.5	98463.4	587.4	35205.8	40668.6	469.03	130310	179049	1343.9	106466	102939	2233.9	34951.5	33932.1	349.77	42648.8	33512.9	28.48	178483	262143	696.87	74412.8	64398.6	2412.79	80336.2	104236	1687.44	61213.5	51095.8	129.94
1176	45928.5	48313.6	142.4	73843.5	57702.3	1556.61	67795.5	121606	776.97	55191.8	82688.1	1943.76	59631.8	78027.2	635.46	44104.5	39273	605.2	53352.8	57805.5	1609.12	222780	176504	1880.57	80676	106355	792.1	52835.2	58457.9	349.77	91698	131000	1215.74	68384.2	63382.2	501.07
1177	48687.8	58037.8	546.46	47942.2	36770.3	410.29	108302	176920	5698.67	85854.8	100812	749.38	53856	63715.1	594.52	52833	38586.8	179.78	29967	31177.6	201.14	120217	232206	7046.13	86526	108603	1321.65	82446.8	83315.6	630.12	153710	190298	431.65	65908.5	48954.4	2060.35
1178	35354.2	34188.5	678.18	41796.8	28990	519.76	61529.2	71386.9	407.62	37503.8	45265.4	1707.91	75817.5	124363	517.98	60972	51005	1262.02	41262	60701.6	303.49	130572	81411.9	1606.45	79158.8	115882	898.9	49545	36743.6	909.58	113024	134774	428.98	110911	80199.7	1250.45
1179	43332.8	38505.8	465.47	47209.5	28203.2	414.74	117046	133451	2119.09	40423.5	28355.4	1828.06	87764.2	160968	257.21	39743.2	27152.1	122.82	43557	68737.4	959.42	69785.2	57027.6	1496.98	157852	262143	3765.59	83860.5	57143.3	764.51	82970.2	102282	569.6	54306	41971.5	347.1
1180	36517.5	34151.1	459.24	120633	102882	1512.11	57727.5	94566.1	719.12	61490.2	59934.4	557.14	72903	112419	1037.74	50872.5	48060.9	1833.4	64479.8	102343	2819.52	76657.5	106566	1868.11	91329	155188	3786.06	103198	109401	1212.18	99860.2	161190	2730.52	68015.2	73432.1	886.44
1181	77306.2	93839.8	3832.34	82792.5	62190.5	477.04	112740	150319	1043.97	37131.8	29563.1	446.78	62063.2	94958.5	794.77	61789.5	53319	662.16	115627	120560	494.84	69134.2	63104.6	679.96	242104	262143	752.05	96316.5	109245	8624.1	56154	79849	1054.65	99614.2	82565.3	729.8
1182	61459.5	69379.1	4598.63	96850.5	71305	1415.99	99985.5	140058	1648.28	123122	187365	274.12	73048.5	87070.5	337.31	81319.5	59634.4	766.29	59812.5	72903.5	1257.57	99950.2	68931.4	1447.14	52456.5	67548.3	571.38	94810.5	77647.2	1021.72	68387.2	81095	137.95	66619.5	46765.1	1877.9
1183	77109.8	67330.3	1332.33	164026	111155	1698.12	96256.5	133771	3051.81	34764	26078.8	363.12	81390	112775	2992.18	74635.5	51923.5	845.5	58461.8	66784.7	1808.48	101024	120115	2374.52	67942.5	94222.5	610.54	99281.2	68244.3	866.86	80556.8	79848.1	496.62	60947.2	65463.1	478.82
1184	100068	96011.4	1987.37	52382.2	57854.4	576.72	83802	112058	696.87	44099.2	51317.4	404.95	164582	203328	1533.47	52654.5	42084.5	585.62	85391.2	117922	648.81	186981	205720	9643.15	74991	94070.3	292.81	74784.8	82672.1	823.25	139330	201094	593.63	107733	86560.5	1673.2
1185	45552.8	63643	814.35	47622.8	36735.6	509.08	76568.2	94265.2	291.03	37242.8	39229.4	598.08	52077.8	47168.2	335.53	40523.2	27079.1	307.05	113361	131135	829.48	88928.2	71310.4	2180.5	43140	49937.9	264.33	67910.2	58173.1	1774.66	59349	83570.1	616.77	36871.5	47800.1	639.91
1186	126040	121027	1341.23	209396	194217	5644.38	73557	118566	1640.27	51355.5	60965.9	652.37	58754.2	67013.4	491.28	59315.2	61493.7	364.9	49356	64031.1	892.67	54114	38911.7	1074.23	100025	120778	1011.93	218307	169635	1561.95	76239.8	94330.2	1484.52	64245	53344.8	728.91
1187	61098.8	62289.3	697.76	77255.2	67015.2	907.8	113104	165540	2364.73	47166.8	57043.7	572.27	162345	185033	1577.97	96901.5	80202.4	1205.06	63529.5	66996.5	784.09	69804.8	56024.6	2503.57	97386.8	146299	1552.16	70621.5	53072.5	713.78	97978.5	148007	4557.69	73239.8	85600.2	329.3
1188	57030	50000.2	380.92	40950	29499.9	600.75	105790	146444	1847.64	39919.5	42244.7	545.57	77418.8	106898	1190.82	75945	57433.5	780.53	64264.5	78970.6	387.15	45234.8	41474.9	397.83	187435	262143	1976.69	100552	102313	994.13	53288.2	76887.1	424.53	55884.8	44536.5	182.45
1189	36351	32608.7	313.28	69996.8	60669.5	795.66	62349	79721.8	1579.75	48709.5	66812.3	228.73	103866	167993	1233.54	62529.8	49864.9	350.66	43762.5	46458	905.13	38352.8	23195.2	584.73	84790.5	116337	936.28	139690	119994	1997.16	55977.8	69460	222.5	40207.5	53272.7	772.52
1190	38658	48019.1	517.09	118540	117222	1937.53	71291.2	120845	662.16	38673.8	41142.9	231.4	76736.2	132724	542.01	43641	36433	387.15	38533.5	49699.4	465.47	148363	137695	5607	163494	173658	5122.84	37964.2	28003	318.62	70313.2	117080	676.4	51866.2	55069.6	516.2
1191	34772.2	36019.2	137.06	39289.5	28018.1	270.56	61733.2	94882.9	441.44	43200	56293.4	428.98	85367.2	91247.2	300.82	181120	143741	2234.79	52930.5	78214.1	309.72	59542.5	39129.7	354.22	138909	156812	1683.88	61584	59411.1	2575.66	142264	195765	1872.56	71685	58978.5	374.69
1192	41826.8	55011.8	479.71	42027.8	25032.1	294.59	71008.5	104994	1296.73	69911.2	79962	755.61	87648	120230	723.57	47916	24348.6	695.09	58752	76294.4	513.53	34930.5	37250.1	238.52	64147.5	64270.5	1505.88	70728.8	53437.4	1607.34	64059	71938.7	1002.14	51883.5	42751.1	727.13
1193	40077.8	48759.5	898.9	50879.2	37259	198.47	63742.5	69168.1	420.97	49497	51620.9	910.47	62499	87504.8	963.87	63777.8	52837.5	639.91	44160	59323.8	620.33	121852	74485	4576.38	119205	134699	1020.83	64470.8	74438.7	2928.1	52698	46397.5	154.86	164222	172749	6288.74
1194	78930	69524.1	1570.85	73081.5	52777	534.89	56502.8	60154.2	309.72	43704.8	52447.7	347.99	61489.5	74544.6	635.46	53575.5	31581.7	387.15	82674.8	95173	1471.17	62580.8	52796.6	1709.69	51431.2	59838.3	378.25	42262.5	43236.2	900.68	126322	191552	2710.94	98885.2	99917.6	1854.76
1195	39257.2	38552.1	142.4	41892	27950.4	120.15	64860.8	95484.5	777.86	68273.2	114793	1189.93	95580.8	115815	855.29	131628	109546	2904.96	48268.5	63214.9	629.23	262143	262143	12137.8	66130.5	66410	1244.22	124688	94988.8	1559.28	50271.8	52963.9	532.22	103449	119628	13164
1196	37499.2	38034.1	324.85	98541	62393.4	2724.29	76314.8	90838.7	768.96	87475.5	87524.4	948.74	113587	176684	2426.14	65766	45615.2	908.69	37488	43058.2	451.23	176507	215693	3654.34	58422.8	87530.6	868.64	49452	36673.3	491.28	53607.8	40415.8	304.38	56377.5	42190.4	231.4
1197	42751.5	49546.3	306.16	77342.2	59145.8	1581.53	75225.8	106514	1748.85	37453.5	36684.9	226.06	59199	67246.6	371.13	68937	56096.7	1189.04	32966.2	38526.3	621.22	139375	100373	5853.53	222904	262143	4871.86	68409.8	55695.3	673.73	62514	68263.9	542.01	69859.5	76295.2	470.81
1198	32667.8	27946	493.06	54459.8	44313.1	821.47	76185	110053	1143.65	40321.5	44350.5	182.45	72510	150971	1022.61	49812.8	35531.5	708.44	38385.8	31282.6	259.88	64824.8	53238.9	507.3	176776	193694	2611.26	54289.5	47815.2	1519.23	91755.8	150214	1227.31	61488	47335.5	2431.48
1199	36350.2	20914.1	186.9	54297.8	45187.1	685.3	80056.5	116803	896.23	38673.8	36752.6	904.24	58427.2	81459.9	608.76	67875	42868.6	637.24	50304	58002.2	1290.5	76011.8	70222.8	927.38	153016	93669.8	406.73	68863.5	58229.1	255.43	92261.2	156116	1594.88	66519	61797.1	1159.67
1200	39934.5	29160	304.38	81876.8	58768.5	1950.88	111524	169222	1005.7	50774.2	59954	488.61	56980.5	65472	223.39	95569.5	87977.4	4487.38	43700.2	53748	194.02	78405	67637.3	885.55	148365	226048	3527.96	58995.8	47847.3	1005.7	206024	262143	5181.58	64464	56971.6	996.8
1201	45731.2	53236.2	728.91	81026.2	83439.3	1124.07	52583.2	57616.8	348.88	56002.5	83079.7	559.81	59108.2	60135.5	351.55	107516	85764.9	1356.36	33229.5	35493.2	53.4	82449.8	69315.9	1531.69	54906.8	68574.5	596.3	52988.2	40014.4	723.57	188654	234092	5071.22	119366	87250.3	1429.34
1202	40928.2	42099.7	773.41	68289	50034.9	481.49	64356	97860.8	595.41	38088.8	45390	64.97	127035	167291	1687.44	52066.5	52388.1	1412.43	55080	59722.6	1157	68546.2	50945.4	768.07	96822	122242	1011.04	98676.8	140914	1450.7	127814	154085	582.06	142243	124118	1765.76
1203	36207.8	42119.2	1640.27	60282.8	46268.4	739.59	59868	48181.9	234.96	47402.2	51070	499.29	67491.8	98137.6	150.41	122468	89052.5	1092.92	52321.5	77934.6	680.85	260594	170376	3462.99	134940	211958	1687.44	74402.2	75819.1	767.18	87483	103371	1939.31	62021.2	66013.1	946.07
1204	73335	136615	1835.18	43497	26662.6	650.59	143384	177462	1157	43920.8	59734.1	910.47	125222	188161	1437.35	50106	24230.2	98.79	93530.2	85988.2	1226.42	107852	64350.6	2205.42	54439.5	47495.7	382.7	98027.2	109267	1208.62	62555.2	72073.1	521.54	61038.8	84565.1	1240.66
1205	44690.2	53250.5	501.96	71352	59742.1	1134.75	98943	126760	1743.51	38005.5	36128.7	334.64	79855.5	105358	1139.2	45180	35042	458.35	51387.8	49094.2	1153.44	88698.8	76265	1073.34	39742.5	43027.1	329.3	191634	185425	1175.69	58838.2	39306	172.66	98502	54849.8	939.84
1206	36669.8	26414.3	1259.35	87762	70924.1	1156.11	74976	101951	595.41	40410	46497.2	603.42	90456.8	113578	749.38	73246.5	66549.8	1182.81	63910.5	81653	283.02	36132	36572.8	573.16	70551	103503	1594.88	71192.2	48255.8	550.02	64764.8	80814.7	641.69	71190	59312.3	1235.32
1207	46181.2	57236.8	519.76	80925.8	54581.9	1872.56	71264.2	90811.1	1320.76	71553.8	84897.1	2489.33	115999	121486	999.47	44326.5	28580.6	709.33	29960.2	37893.5	398.72	61326.8	40053.6	558.03	128948	135878	922.93	110500	84749.4	2940.56	262143	262143	2104.85	66704.2	58765.8	929.16
1208	39815.2	39717.1	321.29	67447.5	35996.9	2048.78	98846.2	151425	747.6	57196.5	60539.6	2707.38	111289	153843	1263.8	62947.5	53976.7	962.98	126313	259290	9313.85	117562	123043	5208.28	119365	247946	1496.98	143195	128722	1019.94	172328	182383	1469.39	73402.5	71482.1	979.89
1209	40790.2	36649.3	664.83	208018	192147	19121.7	59773.5	59593.5	143.29	43056	51946.6	670.17	132821	188971	2927.21	43771.5	34647.7	426.31	67261.5	75169.4	322.18	98600.2	67416.6	1133.86	106444	150197	2219.66	202730	232369	2509.8	127170	164915	1070.67	95231.2	65480	672.84
1210	43884	52712.9	175.33	61083.8	61420.7	1396.41	100681	159088	1355.47	39563.2	44384.3	1634.04	95951.2	161384	1164.12	63735	52169.1	1124.96	53609.2	63669.7	712.89	75992.2	79906	4697.42	50472	52358.7	1221.08	115046	102799	2062.13	118948	188584	3526.18	54644.2	49135.1	901.57
1211	38583.8	49762.6	508.19	55914	40479	497.51	62155.5	74564.2	381.81	40294.5	46768.6	405.84	96451.5	158183	3302.79	62386.5	56035.3	836.6	50638.5	70822.6	477.93	89518.5	72569.7	1144.54	103810	150219	1131.19	145460	138255	422.75	102333	144256	5732.49	67445.2	66841.7	836.6
1212	44986.5	55770.1	1078.68	40809	25676.5	-16.02	49950	56214.2	317.73	95213.2	78418.8	1361.7	98970.8	151305	719.12	86064.8	58931.3	865.97	81560.2	114408	3823.44	58995.8	40626.7	1205.95	123058	200919	3197.77	116181	99560.7	1588.65	195565	262143	1910.83	53662.5	33872.5	193.13
1213	39346.5	47576.7	872.2	40954.5	32207.3	606.09	104984	153572	963.87	40825.5	41960.8	549.13	82062.8	140091	754.72	103365	90024.4	3511.05	41817.8	49735.9	483.27	107624	112300	1161.45	132904	188849	1398.19	154838	120656	1590.43	137702	232558	324.85	73976.2	80911.7	642.58
1214	40821	34734	802.78	49232.2	39815	573.16	83685.8	116635	1012.82	38412.8	32696.8	404.95	62657.2	43585.1	291.92	52017.8	53270.9	1015.49	47549.2	58245.2	475.26	72750.8	90846.8	1642.05	89112.8	128157	2095.95	188740	163637	5845.52	192848	262143	4254.2	70773.8	70397.2	1279.82
1215	32815.5	34108.4	271.45	63195.8	49260.6	720.9	116876	217602	939.84	44482.5	41711.6	551.8	57824.2	68710.7	453.01	80397.8	67442.4	1401.75	35669.2	24386.9	379.14	74407.5	58930.5	753.83	93150.8	262143	3896.42	46044.8	49565	350.66	87789	147063	1915.28	139113	104629	3783.39
1216	47097.8	46665.4	216.27	69148.5	56656.5	1231.76	58839	59615.8	235.85	38617.5	58275.4	773.41	64130.2	90646.5	586.51	175165	109188	1833.4	65475	79006.2	1211.29	103171	101145	1367.04	107359	141156	3428.28	47517.8	32975.4	362.23	104157	121390	2063.02	86724.8	89393.4	818.8
1217	38559.8	35266.2	696.87	64615.5	47382.7	1500.54	70178.2	88300.5	461.02	54375.8	67006.3	528.66	70584	100991	650.59	73073.2	57277.7	816.13	44085.8	53319	929.16	128010	98568.4	1198.83	80838.8	106734	1252.23	66921	67893.6	673.73	262143	262143	4801.55	101527	115796	1798.69
1218	35002.5	27142.3	339.98	94555.5	66222.2	2288.19	103168	152783	1719.48	53190.8	57439.7	190.46	91308.8	139812	839.27	121049	76070.1	1471.17	60087	66971.6	632.79	57684	43019	181.56	134834	262143	17244.6	41526.8	33111.6	639.91	177565	242260	1974.91	125035	57392.5	695.98
1219	32894.2	24494.6	211.82	63222	35347.2	707.55	93408	88040.6	403.17	35235.8	39885.3	541.12	47478	41222.1	160.2	71827.5	63646.6	308.83	62766	59670.9	662.16	83113.5	99796.6	3849.25	105668	137699	1188.15	217964	242147	4773.96	160238	256322	2561.42	94065.8	129703	1496.09
1220	37890.8	23869.8	77.43	59041.5	42974.5	222.5	116212	159371	1255.79	37111.5	36046.8	943.4	76430.2	119531	447.67	52081.5	53125.9	700.43	38574	52601.7	1008.37	49964.2	39429.7	409.4	121174	155945	549.13	233695	245773	4473.14	110586	165271	1916.17	105333	73693.8	815.24
1221	56579.2	61313	849.06	59586	52834	726.24	63009.8	63703.5	394.27	33069	25300	189.57	103503	102653	769.85	37198.5	30080.2	324.85	89517	133870	1462.27	63895.5	46914.6	542.9	216243	262143	4994.68	46350.8	39191.1	930.94	127180	251035	6208.64	77253	81482.2	1576.19
1222	55596	62856.2	232.29	123814	128488	4401.94	53673.8	69418.2	400.5	37198.5	31420.6	363.12	97255.5	144742	804.56	63666	47537.6	744.93	144788	173456	2166.26	118204	85839.6	1645.61	63900.8	72257.3	90.78	65361.8	46122.5	1308.3	225992	259431	8705.98	69432	57680.9	657.71
1223	46073.2	32034.7	597.19	45582.8	32051.6	596.3	79705.5	125738	471.7	72863.2	90970.5	1884.13	84128.2	135969	1205.95	72258.8	53992.7	551.8	63942.8	60087.5	833.04	39583.5	28349.2	459.24	81991.5	114630	385.37	74678.2	50249.4	785.87	81570.8	110796	1692.78	84372	82993.4	4304.93
1224	31719	18588.5	163.76	57795.8	54409.3	775.19	74145	117265	712.89	91868.2	105640	369.35	62336.2	87819	330.19	83671.5	61855.9	917.59	69021.8	91820.4	1105.38	59268	41890.5	1093.81	55200.8	43030.6	340.87	73202.2	59235.7	955.86	66000	77999.6	1108.94	66057.8	57905.2	451.23
1225	46233	59531.2	727.13	88628.2	55868.9	853.51	60616.5	55332.2	534.89	38223.8	28246.8	199.36	57405	65998.8	485.94	42959.2	31932.3	507.3	118996	136311	695.09	76357.5	64960.2	1844.97	128212	182252	2261.49	65885.2	95330.6	983.45	100636	194075	1284.27	76739.2	69906.8	1731.94
1226	59594.2	63045.8	287.47	107266	130406	547.35	60843	81572.1	1122.29	44045.2	53339.5	822.36	168607	219367	1785.34	114732	122993	1701.68	38027.2	43008.4	395.16	84384	44685.1	1347.46	115165	144361	3249.39	131521	116459	4663.6	126606	170383	3932.91	97341.8	103503	3800.3
1227	47160.8	54831.1	844.61	82107	56024.6	999.47	69597	120692	648.81	41205.8	56120.7	558.03	50956.5	48727.5	46.28	67447.5	54062.2	699.54	54464.2	70383.9	661.27	42162	32750.2	704.88	70995	87764.7	690.64	126846	159763	2353.16	71763.8	89105	658.6	165049	139916	3705.96
1228	96510.8	87376.6	1034.18	78521.2	64053.3	2441.27	53240.2	71047.8	939.84	38888.2	25386.4	297.26	70156.5	79697.7	1777.33	42201	35351.7	670.17	108628	184606	3095.42	120839	87115.9	2299.76	262143	262143	4769.51	174487	164905	2963.7	160392	191395	3389.12	98102.2	103772	2320.23
1229	48432.8	44524	610.54	55716.8	39989.5	2063.02	52617	53510.4	365.79	45279	55382.9	421.86	76329.8	107129	493.95	137284	78682.2	1998.94	60977.2	68579.8	797.44	104119	78893.2	974.55	132725	165015	4689.41	72072.8	63094.8	1479.18	135722	229411	1921.51	60559.5	59303.4	1797.8
1230	39351.8	33638.4	224.28	105971	80515.6	1148.99	83478.8	123787	704.88	72747.8	103388	1463.16	129512	163693	2814.18	63534	61695.7	1376.83	36340.5	38916.1	245.64	42612	31900.3	84.55	58333.5	65269.9	258.1	55735.5	37111.2	1973.13	98156.2	125941	905.13	70530.8	49048.8	1254.01
1231	46767.8	48565.5	623.89	77537.2	72042.8	928.27	53545.5	50370.4	478.82	34892.2	26968.8	64.08	72222	102961	517.98	60761.2	49601.5	482.38	97905	96519.6	4994.68	36207.8	34614.8	525.99	55608.8	51765.1	526.88	65444.2	51844.3	2007.84	168506	184982	441.44	49416	37715.5	327.52
1232	45510	62916.8	1471.17	87005.2	89268.8	575.83	147992	173817	2516.92	77730.8	108625	864.19	154925	262143	2296.2	43574.2	32796.5	846.39	59391	102507	2541.84	36479.2	33579.7	497.51	132256	210771	3466.55	66949.5	42243.8	712	144233	191734	1091.14	41601.8	35699.7	1213.07
1233	61482	52380.9	1246	63422.2	46700.1	736.03	101038	127292	2017.63	51784.5	58246.9	1679.43	62050.5	81083.4	469.92	62725.5	59950.4	748.49	41259.8	50201.3	580.28	79347.8	51550.6	1582.42	128632	199361	1640.27	43236	46353	251.87	92917.5	143189	313.28	122741	106512	687.97
1234	85339.5	76050.5	976.33	61327.5	46724.1	323.07	76034.2	101615	946.96	37430.2	51292.5	606.98	65905.5	135616	513.53	72348	67009.9	1413.32	54421.5	67608	1031.51	83365.5	67469.1	839.27	97983	137068	2764.34	66858.8	94120.2	398.72	109033	132170	1016.38	159032	123273	3510.16
1235	48446.2	56534.6	692.42	66959.2	45612.5	850.84	76174.5	116195	845.5	44383.5	59672.7	396.94	73295.2	105918	2132.44	50532.8	35587.5	90.78	51942	75447.1	1187.26	67673.2	51547	488.61	99933	145424	2016.74	109757	92459.4	1558.39	65827.5	109838	2141.34	72503.2	65221.9	297.26
1236	34020	29105.7	674.62	43425	30282.2	227.84	79066.5	101914	897.12	54221.2	69808.9	1246	239342	262143	8043.82	85188	91466.2	2022.97	56797.5	74825.9	1279.82	122107	88866.5	2932.55	72866.2	87111.4	167.32	88235.2	105392	1298.51	191317	262143	10942.5	103592	95386.6	2578.33
1237	37886.2	34975.2	278.57	46892.2	35203.9	389.82	55635.8	58847.7	172.66	51144	85095.6	1044.86	54150	57326.7	804.56	99741	86215.2	3051.81	123188	105039	437.88	57230.2	48748	565.15	104163	175153	2727.85	255623	205709	1966.9	123985	192137	1567.29	92342.2	73828.2	1185.48
1238	42758.2	50704.2	511.75	64027.5	59767.9	1238.88	64306.5	89013.4	663.05	34810.5	37847.2	424.53	77889	116457	1595.77	68204.2	72240.4	1383.95	121180	125162	565.15	37593.8	27018.6	371.13	58998.8	81527.6	1105.38	120632	136467	1172.13	126721	150187	1229.09	80714.2	59436.9	991.46
1239	37172.2	27323	439.66	60669	55423.9	550.91	68988	83420.6	688.86	39177.8	31613.7	343.54	52527	63833.5	392.49	46123.5	28957.9	391.6	32682	37752.9	418.3	132256	79179.7	1247.78	76848.8	118931	400.5	57762.8	61989.4	971.88	96597	109682	453.9	130015	98291.6	4029.92
1240	43719.8	53537.9	403.17	52685.2	36350.3	461.91	155062	188755	11728.4	46343.2	44283.7	513.53	71385	129104	840.16	105122	61953.8	1737.28	79647	86625.5	2436.82	68977.5	60000.2	724.46	94079.2	124937	1931.3	71174.2	77225.3	397.83	207903	262143	4432.2	114938	84122.8	917.59
1241	38512.5	44516	479.71	79329.8	57690.7	552.69	53613	42674.6	260.77	42550.5	56180.4	651.48	67527	118891	512.64	82677.8	61612.9	790.32	40953	42978.1	152.19	65438.2	55383.8	3781.61	95472	143047	2646.86	37974	57409.4	550.02	91116.8	118863	859.74	56594.2	55547.6	501.96
1242	39022.5	38621.6	671.06	62685	48973.1	2128.88	72266.2	101909	564.26	63007.5	93064.6	706.66	77490	106365	1219.3	72735.8	46471.3	798.33	55286.2	75508.5	1682.1	124912	107686	6696.36	111534	169867	5679.98	150664	220562	3746.9	52558.5	29580.9	322.18	81977.2	68425	1320.76
1243	53477.2	80705.2	922.04	86087.2	61936	1077.79	60966	67387.2	536.67	51177	60555.6	443.22	61508.2	53651.9	122.82	68862.8	61814.9	596.3	43487.2	51395.7	2658.43	76515	43904.6	1122.29	57185.2	68633.2	1261.13	53976.8	42616.8	623	54737.2	41440.2	610.54	167820	169799	1810.26
1244	43129.5	38959.8	533.11	63762.8	60164.9	742.26	45624.8	38434.6	330.19	45312	60562.7	613.21	74974.5	119425	926.49	57226.5	40860.8	193.13	32509.5	36121.5	264.33	102695	80597.5	6714.16	88359	158846	368.46	111249	63255.9	4121.59	76777.5	91215.2	566.93	134350	138288	1800.47
1245	44783.2	60186.2	901.57	77105.2	93048.6	950.52	60468.8	66333.5	165.54	37658.2	40990.7	367.57	113278	144965	789.43	48198.8	39093.2	619.44	47289.8	55374	1334.11	76110.8	79121	2099.51	54854.2	50932.9	129.05	105542	101377	1173.91	94910.2	126531	353.33	93233.2	96274	1485.41
1246	59523.8	76906.7	1055.54	95177.2	107415	1498.76	77887.5	106190	1043.08	46590	55706	535.78	70857.8	114010	917.59	42133.5	64868.5	332.86	48071.2	41929.7	1171.24	98268	79292.8	1451.59	55963.5	69638.9	944.29	124058	72644.5	1359.03	116538	150299	2520.48	193156	262143	2475.98
1247	104914	107715	1501.43	64710	62917.7	1187.26	63891	72944.4	844.61	42403.5	46238.2	418.3	131316	160355	1445.36	39132.8	24981.4	278.57	38146.5	37068.5	652.37	117646	87481.7	6554.85	56064.8	51499.8	96.12	78604.5	81250.8	1366.15	108958	140709	445	89032.5	80819.1	609.65
1248	34736.2	27186.8	258.1	48818.2	25317.8	474.37	86274	112656	1325.21	33383.2	34409.2	364.9	148798	243504	4492.72	167039	151384	3270.75	45108	61732.2	590.07	66627.8	49591.7	942.51	78096.8	75658.9	701.32	48294.8	28450.6	141.51	68307.8	47499.3	509.97	262143	262143	6838.76
1249	34650	24567.6	529.55	52981.5	44252.6	822.36	78473.2	112747	812.57	39798.8	36029.9	756.5	189650	262143	2715.39	43848	32566	562.48	56190	63279	1196.16	110355	104753	1851.2	61564.5	73811.3	1012.82	145816	149605	5920.28	89257.5	123789	614.99	75846.8	61709	310.61
1250	44748.8	52994.2	550.02	43721.2	28059.9	509.97	84150.8	87258.3	885.55	43626	57612.4	421.86	88280.2	151450	630.12	59723.2	34678.8	816.13	39575.2	48597.6	785.87	166658	157125	4685.85	47393.2	70385.6	899.79	14793	113427	176.22	262143	262143	6740.86	104016	128882	1506.77
1251	69823.5	73182.9	180.67	119367	88164.3	1492.53	61539	74499.2	1342.12	42514.5	46766.8	493.06	76191	102082	648.81	55329	43849.4	999.47	37242	28255.7	335.53	88961.2	87890.2	210.93	103546	262143	3339.28	116735	109560	2014.96	107037	153423	2286.41	53532	57741.4	552.69
1252	67326.8	64124.5	910.47	75490.5	66653.9	410.29	83099.2	117487	2028.31	51362.2	54358.5	850.84	57667.5	101667	629.23	68961.8	70988.2	1205.95	48100.5	58680.4	463.69	34098	35221.8	985.23	59721	72175.4	2279.29	108322	79930	1588.65	129016	203539	1239.77	175418	151903	2603.25
1253	67564.5	80395.5	2862.24	89565.8	68751.6	517.98	69999.8	90547.7	776.08	65754.8	82151.4	1833.4	86598.8	145092	882.88	70469.2	63093	317.73	52746.8	62292	575.83	62416.5	51125.2	235.85	40344.8	66553.3	90.78	70683	46515.8	671.95	86100	166701	1140.09	183086	111587	3219.13
1254	38064.8	27752.9	210.04	62694	67632.9	736.92	47232	48757.8	294.59	54327.8	52525.1	642.58	61043.2	74959.4	353.33	71919.8	59273.1	1801.36	44764.5	75231.7	1359.03	118644	77741.5	1246.89	85511.2	155714	1432.01	111673	120492	1067.11	148666	212827	3175.52	79191	51247.1	810.79
1255	45855.8	54883.6	536.67	40203.8	22933.5	484.16	62564.2	70114.2	1433.79	70369.5	98001.5	284.8	54600.8	70573.4	396.05	109777	103701	3209.34	65758.5	91042.5	857.96	84143.2	43311.8	914.03	152408	202111	1958.89	75357.8	79330.1	441.44	178913	262143	13881.3	70403.2	71157.3	1310.08
1256	33868.5	34568.5	260.77	44077.5	35968.5	374.69	64549.5	81588.1	493.06	44592	47737.8	419.19	52720.5	64705.7	380.03	52752	41467.8	1386.62	56928	60293.1	878.43	85986	88899.4	991.46	58566.8	62049.9	1144.54	123695	125040	1456.93	99222	151996	1534.36	66255	45284.1	609.65
1257	62826.8	82769.1	2272.17	51219	40463.8	846.39	57345	74364.8	943.4	76493.2	120898	1325.21	53679.8	44515.1	799.22	63398.2	48886.8	495.73	102860	111444	1377.72	116419	116854	1605.56	99480	152822	1779.11	106076	66106.5	1059.99	213044	262143	14187.5	116227	130439	10771.7
1258	52733.2	58615.4	673.73	50392.5	20458.4	63.19	98142	150001	2072.81	37150.5	42996.8	373.8	80110.5	107617	937.17	56370	46110.9	1066.22	43101	50016.2	620.33	62493.8	75590.4	2183.17	52515.8	50830.6	781.42	41620.5	27305.2	430.76	74671.5	36164.3	283.91	98301.8	63487.3	1059.99
1259	36291	42979	622.11	54075.8	48420.4	521.54	151827	256774	1586.87	47650.5	63679.5	1017.27	113594	116274	755.61	146845	139969	3996.99	67598.2	74736	725.35	88074.8	127098	1212.18	35973.8	57802.8	340.87	55285.5	40206.6	1391.07	70738.5	84224.3	1901.04	96764.2	66579.1	1162.34
1260	46396.5	52550.9	761.84	43049.2	21485.5	342.65	19062	262143	104.13	34267.5	28952.6	235.85	61954.5	86646.8	660.38	85777.5	100186	1815.6	36623.2	39505.3	443.22	99472.5	69891.7	3878.62	114993	175803	406.73	66252	85772	791.21	132329	212399	1266.47	187819	186003	4399.27
1261	49709.2	56937.8	943.4	48465	23129.3	573.16	63739.5	84561.6	1654.51	44318.2	39783.9	1116.95	70281	98820.3	729.8	146204	136543	5433.45	91146	100914	1018.16	79702.5	75554.8	3800.3	262143	262143	7497.36	91306.5	103535	513.53	102523	143020	1073.34	56411.2	62075.7	2163.59
1262	54180.8	48222.9	970.1	57728.2	49860.5	644.36	125328	153972	1282.49	71751	113930	384.48	124736	167677	2071.03	49850.2	52122.8	249.2	69851.2	89677.3	2059.46	75662.2	105877	4446.44	65660.2	83573.7	736.92	79087.5	81408.3	1398.19	187457	218001	8309.04	105070	109939	1315.42
1263	35972.2	26961.7	333.75	91362.8	76192.9	1043.97	82698.8	143837	1895.7	73557.8	104328	813.46	72771.8	103527	928.27	70225.5	59011.4	1132.08	50762.2	54856	616.77	176096	186850	1751.52	75936	92635.6	598.08	193965	197267	33509.4	123282	180402	1264.69	77049.8	57847.3	630.12
1264	71753.2	82327.7	3420.27	87654	97779.9	449.45	58495.5	53715.9	217.16	91065.8	99307.1	1584.2	83018.2	112642	692.42	119108	109587	1568.18	71721	61895.9	2775.91	100436	88010.3	1003.03	137030	135101	2477.76	56307	55199.6	2055.01	90754.5	89174.4	605.2	79788	100958	4267.55
1265	60486.8	62621.3	861.52	90520.5	69051.5	929.16	49715.2	66235.6	327.52	52387.5	63452.6	1061.77	71025	94513.5	1068.89	67215.8	42062.3	700.43	92262	86969	5226.97	131654	89924.7	1909.94	54657	62687.1	2087.94	119745	95190.8	3424.72	110682	199791	1314.53	63668.2	53487.2	178.89
1266	35573.2	43568.2	625.67	54303.8	49324.7	1000.36	94586.2	147064	1211.29	53739.8	72002.8	566.93	104962	185245	396.94	57937.5	35487.9	590.07	36081	36778.4	721.79	57663.8	47877.6	559.81	141776	166983	2627.28	113430	111973	1127.63	77373.8	95020	801	70596	63637.7	265.22
1267	47868	51224.8	452.12	76504.5	58263	833.04	71422.5	109680	434.32	42824.2	46968	469.03	107242	128366	679.96	47408.2	46595.9	527.77	42510	53735.5	752.94	60057.8	51358.3	1673.2	104991	118657	975.44	73661.2	91465.3	1462.27	49068.8	82448.7	558.92	74786.2	62350.7	868.64
1268	55254.8	73047.6	2948.57	85256.2	59535.7	1059.1	84062.2	126295	790.32	45358.5	59275.8	614.1	129446	145758	544.68	96606.8	92777.2	6189.95	51396.8	56129.6	542.9	69734.2	59537.4	1345.68	186982	223596	2274.84	77171.2	54825.8	567.82	78210.8	84593.6	865.97	90970.5	119700	1651.84
1269	38717.2	51326.3	460.13	89550	93785.5	2216.99	63106.5	89623.9	916.7	39320.2	30732.6	330.19	57046.5	76289.9	944.29	61040.2	46777.5	1148.1	33273.8	43331.4	375.58	84893.2	107097	1026.17	188880	262143	2619.27	51168	40358.8	178.89	49296	43544.1	186.9	150370	137598	4992.9
1270	51576	65166.7	1984.7	61266	43293.2	575.83	66540	83927.9	577.61	36403.5	38122.3	566.04	82441.5	108634	885.55	42470.2	41466.9	251.87	41129.2	57344.5	1194.38	60567	45115	756.5	77141.2	106502	628.34	99162	88299.6	1178.36	121036	195331	1741.73	49465.5	49233.9	97.01
1271	42379.5	53445.4	195.8	39735.8	31609.2	387.15	79836	85968.7	1206.84	109739	84828.6	1269.14	107466	140122	650.59	78678	51761.5	1773.77	175814	239708	7817.76	96235.5	93724.1	1565.51	107575	154508	871.31	79738.5	91112	3299.23	91065.8	124832	1010.15	128704	94716.5	1503.21
1272	42646.5	51911	578.5	47234.2	26856.6	151.3	50303.2	73255	934.5	63398.2	86609.5	1601.11	69431.2	96807.1	701.32	48405	36445.5	760.95	55068	77454	2897.84	180993	86161.8	2731.41	193737	262143	1675.87	127226	125039	3033.12	183314	201736	776.97	64417.5	51743.7	396.94
1273	33342	33957.9	508.19	54486.8	41188.3	1335	71959.5	87511.9	886.44	53868.8	70721.2	1112.5	145801	193017	4778.41	47994	40090.9	419.19	81206.2	145178	2516.03	98905.5	107695	2006.95	86724.8	95274.5	1746.18	182114	203543	7985.08	67176.8	59403.1	1692.78	153326	162159	3806.53
1274	42721.5	46152.7	1326.99	73008	62389	663.05	89970	138610	1030.62	38700.8	37857.9	416.52	57430.5	59729.7	487.72	73425	53232.7	613.21	46637.2	50061.6	752.94	134446	127597	1812.04	61556.2	78440.1	468.14	64965	39626.4	632.79	69378	92910.7	1333.22	69648.8	56863	3025.11
1275	77565	97586.7	3236.93	41080.5	30422.9	445.89	73173	102184	1560.17	36846	34191.1	553.58	220535	262143	9861.2	84736.5	59691.4	655.93	87856.5	118372	5145.98	61480.5	51417.1	792.1	112190	187273	561.59	59888.2	70957	833.04	83019.8	128246	1210.4	127727	94544.7	2057.68
1276	36975	42426.3	824.14	85346.2	94960.3	1075.12	91288.5	146203	701.32	38147.2	47373.8	219.83	149329	185545	1035.07	44892.8	35463.8	159.31	32724.8	47046.3	285.69	38770.5	31655.5	439.66	51879.8	74388.9	428.09	232352	173159	1760.42	78837.8	90036.9	2342.48	81462	89601.6	1690.11
1277	50203.5	55442.6	821.47	45094.5	24943.1	433.43	53765.2	66200	598.97	41370	36731.2	363.12	56154	68136.6	413.85	79679.2	67344.5	913.14	95742.8	144422	176.22	262143	262143	11894	77895	104320	1817.38	98001	84385.4	14171.5	99622.5	97335.7	396.94	98086.5	127355	1040.41
1278	57857.2	85550.4	1566.4	93727.5	74608.7	1201.5	58198.5	58756	117.48	36509.2	29833.7	324.85	63193.5	90123.2	543.79	66848.2	60304.6	776.97	91843.5	107781	2476.87	60057	51428.6	2415.46	120493	157016	325.74	104092	86411.9	1273.59	79146	111915	1683.88	61494	49923.7	734.25
1279	37099.5	33922.3	225.17	75707.2	41489.1	420.08	77627.2	101974	594.52	51490.5	66875.5	510.86	80212.5	149742	759.17	62105.2	43882.3	634.57	154850	262143	1132.97	55387.5	54239.3	284.8	48218.2	51857.6	948.74	113360	126492	9408.19	108206	161239	1410.65	65560.5	49712.7	750.27
1280	57774.8	52667.5	927.38	59715.8	50443.4	1711.47	62220.8	78196.3	628.34	55747.5	73529.1	654.15	74798.2	124632	874.87	57259.5	44864	1282.49	98577	105233	1734.61	100214	142055	4352.99	74781	100461	825.03	112298	147080	1124.07	142801	167957	2704.71	73325.2	86856.9	1029.73
1281	32981.2	32557.1	612.32	95748	94820.6	2022.97	135817	190500	2688.69	41193.8	50799.4	865.08	126417	159265	1204.17	62809.5	57284	1251.34	47119.5	61751.8	3193.32	36757.5	26479.3	239.41	161492	262143	2443.05	72614.2	62891	1359.92	91275	150196	2122.65	111339	125275	6524.59
1282	43893.8	45080.3	412.07	101743	85444.4	2459.96	60844.5	72066.9	267.89	42853.5	45304.6	460.13	73554	113007	273.23	44363.2	25097.1	64.08	79433.2	118366	1854.76	144693	150240	9239.09	96862.5	126713	767.18	68735.2	55087.4	318.62	58056	78056.6	529.55	49842	34616.6	419.19
1283	33621	37522.4	271.45	234580	167914	3172.85	73109.2	102241	2081.71	38962.5	44409.2	529.55	98713.5	166361	958.53	67962.8	60245	1190.82	108236	196013	3509.27	74947.5	47485.9	1869.89	57583.5	66686.8	1227.31	42744.8	24615.6	89.89	82539.8	106476	1128.52	63741	46862.9	898.01
1284	40271.2	47774.3	591.85	54297	54889.9	689.75	124924	181489	3017.99	62143.5	75334	1489.86	87224.2	157170	1158.78	43853.2	23900.9	853.51	68827.5	84766.3	1055.54	41100.8	28019.9	780.53	94365	144595	1272.7	48045	39479.5	528.66	57783.8	71070.1	910.47	92707.5	98822.9	819.69
1285	35399.2	38617.1	355.11	75651.8	62041	655.93	98156.2	134326	640.8	44282.2	57190.5	473.48	104536	166920	388.04	65917.5	41555	1052.87	40363.5	62709.4	784.09	113144	89243.9	1069.78	142506	166111	3700.62	159329	143857	1310.08	155678	225026	3082.96	72358.5	77157.7	1745.29
1286	35530.5	28819.1	244.75	55281	40333	803.67	69382.5	87093.6	498.4	67425	113309	936.28	167516	262143	1748.85	51117.8	38418.6	1012.82	37077.8	44290	1105.38	59399.2	43053.8	500.18	70902.8	104536	1585.98	36918.8	35745.1	979.89	107546	219942	2291.75	70747.5	65072.3	2963.7
1287	34986.8	30199.5	783.2	45968.2	32357.7	552.69	93637.5	146081	792.99	38091	18493.3	378.25	60975	81315.7	465.47	58169.2	35470.1	869.53	81519	156989	5342.67	52009.5	44420.8	699.54	102538	191908	846.39	69573.8	59640.7	530.44	79897.5	115106	1194.38	207223	223448	1373.27
1288	55191.8	63155.3	810.79	43546.5	34928.9	685.3	61278.8	65218.3	436.1	37264.5	45016.2	663.94	52891.5	73539.8	645.25	78993.8	51830.9	324.85	35654.2	43279.8	950.52	65214	56999.2	1201.5	110359	138238	1331.44	102052	80478.2	464.58	72216.8	109380	2080.82	79245.8	74783.1	6133.88
1289	83532	93112.7	1035.07	81844.5	60295.7	722.68	77616	117849	835.71	51275.2	89471.7	501.96	79431.8	120148	559.81	73269	48192.6	373.8	85050	115627	3459.43	99671.2	108487	2764.34	65674.5	94029.4	993.24	134888	172195	4161.64	60288	79000	337.31	135220	108475	3454.98
1290	53848.5	59923.7	469.03	40281.8	30509.2	863.3	117501	139296	2783.03	54108.8	69480.5	1665.19	102860	179766	1681.21	124285	105447	1443.58	74097.8	68023.6	825.03	180974	141794	9781.1	120575	138186	1108.05	93826.5	86122.6	1739.06	99706.5	212666	1750.63	43392	33037.7	1059.1
1291	68499	76215.1	820.58	36985.5	29896	346.21	70533	106830	502.85	39027.8	38405.3	708.44	68536.5	96144.9	1221.97	42173.2	35572.4	325.74	56730.8	65768.3	608.76	172784	151273	2433.26	68445.8	84507.3	505.52	48453	31475.7	578.5	153494	208943	6373.29	43394.2	41223	2170.71
1292	47106	53413.3	1303.85	45192.8	25395.3	153.97	91147.5	131360	250.09	47657.2	58416.9	608.76	65310	103126	590.07	89478.8	90679.4	4060.18	53406	43176.6	529.55	49416.8	43305.6	430.76	72768	108078	836.6	73458	65041.2	1142.76	71205	68043.2	251.87	50677.5	40044.7	272.34
1293	48876.8	57019.6	627.45	50571	40362.4	578.5	94391.2	132127	575.83	34610.2	30664.1	310.61	92547	124714	597.19	45817.5	24008.6	539.34	41341.5	50436.3	511.75	61270.5	57632.8	1007.48	71535.8	102190	1441.8	126440	86336.2	1225.53	148590	202252	4375.24	99928.5	61796.3	843.72
1294	41030.2	44619.3	398.72	83081.2	53764	1521.9	53688.8	49139.6	277.68	49741.5	54810.6	429.87	72159	85639.4	1657.18	70317.8	48816.5	1544.15	65381.2	78777.5	855.29	101109	73515.8	857.96	128752	237586	2123.54	48990.8	34160	313.28	94712.2	71103	579.39	53181.8	48412.4	2238.35
1295	67449.8	82834.1	2722.51	58137	44861.3	969.21	88283.2	120213	2283.74	34996.5	29674.4	276.79	108284	144480	326.63	73860.8	60041.2	560.7	61042.5	86726	853.51	122215	99175.4	1415.99	106984	139081	982.56	125609	105850	1354.58	137140	218078	1841.41	37086.8	21147.3	-11.57
1296	35258.2	26834.4	506.41	62502.8	44996.6	2016.74	58902.8	77709.5	559.81	54500.2	77075.8	287.47	184514	262143	1537.92	44510.2	29032.7	202.03	57921.8	84877.5	1403.53	119530	100211	4019.24	142402	144028	1220.19	128266	96767	1267.36	89072.2	122181	1823.61	157598	104590	850.84
1297	44179.5	47245.6	525.99	160128	140920	2710.94	61897.5	81922.7	777.86	48409.5	69502.8	582.95	90174.8	118690	2458.18	64791	52555.4	2010.51	54178.5	62260.8	830.37	63102.8	65508.4	70.31	262143	262143	5785	84487.5	68933.2	951.41	61675.5	77965.8	1036.85	112998	119871	671.95
1298	35596.5	26560.3	258.99	53677.5	36354.7	706.66	57007.5	59063.1	347.99	79487.2	93282.7	681.74	59396.2	57346.3	234.07	46293	33666.9	792.1	84232.5	125624	540.23	40446.8	34920.9	751.16	105339	97703.3	6553.07	81489	67511.8	250.09	203248	189601	7072.83	77145.8	88443.8	1084.02
1299	34399.5	21305.7	325.74	41304	30838.5	542.01	89328	137110	778.75	42128.2	46432.2	486.83	57410.2	65069.7	447.67	60195	41599.5	799.22	37866.8	35172.8	333.75	87506.2	86611.2	1541.48	200951	182739	1552.16	83520.8	69468.1	1171.24	76148.2	72135.4	359.56	50835.8	39551.6	525.99
1300	51905.2	77554.6	669.28	46537.5	35309	687.08	58908.8	77526.1	1239.77	38120.2	36535.4	248.31	139144	235352	1327.88	53544.8	39057.6	899.79	36612	34868.4	353.33	44253.8	45407.8	42.72	124190	176518	6568.2	73146	63795.2	798.33	62223	107687	1309.19	46088.2	38809.3	495.73
1301	55149	60098.1	2386.98	42273.8	30433.5	671.95	176304	232554	1472.95	41277.8	44518.7	353.33	116429	162942	1883.24	56784.8	60565.4	717.34	42468	37878.4	286.58	44517.8	30755.7	340.87	90933	158100	2073.7	66582	54998.4	730.69	115290	152855	2762.56	107282	104798	2483.99
1302	37734.8	56985.8	549.13	38760	29836.4	431.65	153372	212360	4485.6	80704.5	120789	915.81	64897.5	73482.9	182.45	60834.8	46416.2	1421.33	47446.5	62993.3	740.48	59478	58942.9	907.8	149038	254210	1755.08	43547.2	53088.5	380.03	111463	204138	4397.49	96138.8	80997.1	2248.14
1303	62292.8	60266.3	1221.97	86193.8	67017.9	567.82	75789.8	104038	664.83	45168	63956.3	1724.82	72953.2	108216	914.03	70575.8	58336.8	1631.37	40676.2	55170.2	597.19	58297.5	57784.1	635.46	181013	262143	21110.8	107573	97626.8	2810.62	80858.2	76844.4	1296.73	95193.8	127779	6780.91
1304	51755.2	48380.4	2917.42	61074.8	66256	1796.91	112751	179024	1881.46	40310.2	49787.5	420.97	69153	92598.3	589.18	63920.2	47456.6	532.22	35721	38908.1	863.3	62274	51979.6	796.55	90239.2	123095	1026.17	172663	131845	7577.46	164020	198725	2084.38	84028.5	100252	750.27
1305	82466.2	84838.4	2364.73	73314	57116.6	586.51	79377.8	77016.1	979	43608	46392.1	566.93	110872	187112	2823.97	50345.2	44252.6	542.01	43335	44848.9	712.89	54354.8	34344.2	510.86	71139	79578.5	1035.07	76161	74597.1	3131.02	107150	173539	1629.59	63465	56284.5	4437.54
1306	99269.2	115270	1192.6	76107	71295.2	1023.5	63874.5	85562.8	809.01	54412.5	62676.5	363.12	139507	221606	1718.59	71417.2	46584.4	482.38	51428.2	69541.9	687.08	72304.5	56627.1	1543.26	197579	203653	929.16	115340	83665.3	995.91	85545.8	125355	2066.58	44615.2	38469.4	1193.49
1307	43056	54027.4	506.41	135784	106195	631.9	75437.2	82919.5	865.97	76337.2	91264.2	1398.19	102112	142896	2134.22	75771.8	75691.8	1106.27	36177.8	37205.6	511.75	113006	138333	1270.03	69832.5	84234.9	1610.01	70497.8	74672.8	1410.65	132446	251514	3145.26	87072.8	97145.3	1442.69
1308	71794.5	113852	1012.82	42918	29803.4	554.47	101545	99027.6	1368.82	44763.8	47459.2	1313.64	79433.2	106109	655.93	46285.5	38966.9	395.16	63615.8	81111	921.15	37867.5	28967.7	444.11	84189	96597	833.04	86597.2	48908.2	1498.76	170122	262143	7059.48	54336	52995.1	267
1309	51370.5	55732.7	759.17	226525	207374	2668.22	133877	151528	2910.3	42452.2	46563.9	466.36	56937	66486.6	507.3	90196.5	67209.2	1203.28	43576.5	53559.3	528.66	156346	96421.7	1839.63	76655.2	97367.8	244.75	147723	146179	999.47	61242	89991.5	628.34	64606.5	63648.3	582.06
1310	53716.5	45785.2	520.65	41535.8	22219.7	436.1	64372.5	104339	509.97	58524	62516.3	542.9	85503	104385	517.98	87507.8	56856.8	1496.98	40485.8	28278	408.51	70269.8	57074.8	1914.39	88216.5	136596	1061.77	93738	87744.2	1387.51	58993.5	64765.3	492.17	163381	137522	7910.32
1311	42768	47491.3	383.59	44799	32444.9	484.16	73936.5	100323	863.3	31734.8	33911.7	299.93	54151.5	72459.4	99.68	63448.5	46025.5	1073.34	78944.2	106459	298.15	116318	89942.5	1615.35	82170.8	113625	960.31	67332.8	60389.2	477.04	132056	157852	1300.29	63012	54689.6	1116.06
1312	47602.5	46057.5	468.14	84636.8	77244	1239.77	93908.2	129673	990.57	32340.8	25775.3	205.59	58455	66051.4	428.98	227122	237763	5840.18	102053	178628	1793.35	48208.5	32794.7	5.34	189802	262143	2823.97	128265	127260	6201.52	244523	262143	12081.8	50424.8	26506	458.35
1313	89232.8	89791.2	1789.79	47422.5	27356.8	739.59	91383	148401	685.3	82044	108544	1070.67	65501.2	81431.4	403.17	46026	35386.4	791.21	143814	262143	6651.86	102437	83791.7	1097.37	64695	66397.6	653.26	169042	105857	3603.61	87616.5	141069	1331.44	105257	71018.4	1097.37
1314	14346.8	48724.8	13.35	50836.5	35150.6	401.39	80695.5	119196	1958.89	66283.5	88746.4	375.58	77167.5	122915	1326.99	94598.2	80645.6	1996.27	67428	70014.5	238.52	56364	43667.8	532.22	112132	115877	226.95	57375	75493.4	1121.4	49062.8	41083.3	301.71	143736	120328	3342.84
1315	39028.5	46362.8	287.47	56828.2	31220.3	522.43	71678.2	89030.3	1105.38	48483	48558.4	783.2	58217.2	60004.7	325.74	50600.2	36833.5	541.12	104380	87943.6	1404.42	46605	36508.7	700.43	55083.8	45848.3	922.93	104631	122820	1808.48	68050.5	88499.8	493.06	106408	71149.3	1117.84
1316	44608.5	56526.6	493.95	48976.5	37876.6	569.6	69780.8	88067.3	810.79	51885	71295.2	199.36	137515	193350	1796.02	88016.2	76174.2	2276.62	57686.2	58109.9	852.62	69231	47119.3	1382.17	65523	74850.8	411.18	114376	95647.4	1888.58	71120.2	119669	641.69	78780.8	78112.6	1895.7
1317	33754.5	24983.2	271.45	37643.2	22911.3	273.23	137832	232514	1150.77	37794	18570.7	513.53	121294	241743	6837.87	59190	39136.9	530.44	69765	81694.9	788.54	262143	262143	37113	149913	184869	1845.86	63482.2	33865.4	1282.49	79815	105762	1817.38	41760.8	27116.5	438.77
1318	41550.8	49735	435.21	59767.5	51027.3	730.69	96742.5	146360	1326.99	34918.5	38756.8	340.87	59291.2	74106.7	563.37	92548.5	71425.2	1562.84	158015	258069	2694.03	100616	128079	491.28	64510.5	66070	2084.38	119606	106175	3608.06	125570	220090	2100.4	112694	100998	2160.92
1319	58797	86411.9	915.81	38899.5	19922.7	286.58	94308	157291	1695.45	46182	52128.2	654.15	102279	118461	2561.42	262143	262143	23179.2	40392	38916.1	485.05	66905.2	52393.4	1033.29	52812.8	57317.8	1173.91	240916	227012	3188.87	146164	213203	6821.85	76626	72870.5	2566.76
1320	36516.8	40666.8	339.09	59253	42791.2	696.87	72636	94712	1211.29	78522.8	87074.9	3218.24	101451	133048	1124.96	49628.2	47308.8	1006.59	34138.5	31969.7	541.12	69634.5	55888.4	868.64	113819	145230	3862.6	108644	110392	598.08	74566.5	109286	760.06	84198.8	99698.7	1730.16
1321	64166.2	71197.3	894.45	45785.2	28221.9	427.2	73521	81439.4	558.92	36817.5	44103.1	323.96	127225	191253	2011.4	46860.8	40260.9	833.04	52260.8	57555.4	867.75	130304	93299.6	3932.02	112876	93097.6	325.74	85101.8	45944.5	1032.4	76307.2	103277	1516.56	79166.2	86853.3	5153.99
1322	28745.2	21814.8	415.63	44901	35004.6	1387.51	73193.2	90022.6	475.26	49090.5	56941.3	479.71	89835.8	143805	1342.12	41946.8	30153.2	656.82	76053	111735	1190.82	39448.5	26045	548.24	78330.8	141783	780.53	47325.8	53317.2	923.82	65484.8	85331.4	779.64	40728.8	59385.2	388.04
1323	32924.2	21513.1	182.45	96655.5	76017.6	784.98	78551.2	115975	4292.47	41981.2	34861.3	548.24	68598	97976.5	784.09	81027	63528.2	2115.53	61499.2	70074.1	1243.33	115262	106602	4196.35	135014	176048	2768.79	115573	83409	1400.86	156567	262143	681.74	262143	262143	5557.16
1324	83518.5	93478.5	2186.73	84406.5	51753.5	848.17	55557.8	43608.2	459.24	44367	55558.2	586.51	59279.2	63526.4	131.72	38573.2	31047.7	1021.72	56570.2	47743.2	664.83	169904	136994	4409.95	83780.2	143059	1366.15	80235	97248.5	1060.88	112232	153298	1206.84	81797.2	136491	1443.58
1325	49725	60809.2	1294.06	72640.5	41908.3	857.96	72401.2	128091	1082.24	54083.2	51650.3	775.19	110494	169921	1168.57	79000.5	59164.5	1822.72	56243.2	94175.4	925.6	119091	112670	1589.54	84413.2	119521	3348.18	116910	99584.8	2891.61	58984.5	72351.7	542.01	121568	134091	1754.19
1326	40146	32592.7	428.09	48227.2	47399.6	494.84	75493.5	102234	307.05	43890.8	30044.6	274.12	104565	136912	2241.02	64334.2	49486.7	742.26	101500	116315	374.69	99829.5	62384.6	2506.24	59535.8	69785.8	505.52	82689	92390	346.21	120495	204285	1669.64	63294.8	51361	303.49
1327	80766	98523.9	1219.3	50553	36870.9	214.49	203686	226404	3837.68	76159.5	87715.7	721.79	58796.2	55210.3	223.39	103735	95042.2	2481.32	37381.5	45323.2	366.68	66432	77052.6	2041.66	94761	122833	277.68	179675	163183	1576.19	61507.5	69624.7	780.53	46614.8	29161.7	442.33
1328	33769.5	30122	210.93	69886.5	73163.3	1245.11	56350.5	74250	529.55	63917.2	84697.7	108.58	63678	115005	866.86	63565.5	42882.9	572.27	33939	45278.8	535.78	106322	104224	5118.39	49374	58970.5	566.04	45807.8	53097.4	375.58	95122.5	110907	1099.15	117712	88001.4	3350.85
1329	41779.5	45686.4	1148.1	46649.2	41121.6	305.27	141815	195296	484.16	48156.8	61866.6	202.03	60133.5	80221	1160.56	90393.8	106530	1720.37	144241	213563	2532.05	60207.8	45324.1	1194.38	90849.8	215745	1066.22	38176.5	28891.2	429.87	82837.5	125353	954.08	43574.2	41098.4	420.97
1330	36076.5	32608.7	339.98	56667	41031.7	731.58	54261.8	77941.8	644.36	42090	54238.4	418.3	75896.2	98037.1	814.35	57438.8	39776.8	113.03	43694.2	58477.4	769.85	94982.2	71655.7	901.57	151120	201421	1649.17	44825.2	32075.6	21.36	65506.5	102626	982.56	65010.8	48416	1486.3
1331	54147.8	57459.3	549.13	51305.2	46891.4	620.33	68683.5	76677.1	670.17	42075.8	40234.2	505.52	108425	134106	1931.3	75256.5	73097.5	2531.16	71420.2	116890	1378.61	128278	83594.1	1523.68	134097	214818	1200.61	60502.5	47621.2	679.96	91203.8	145152	1427.56	64407.8	57838.4	1286.05
1332	43790.2	48809.4	443.22	63480	39782.1	485.94	61874.2	82545.7	655.93	59173.5	67566.1	679.07	74499.8	111804	380.92	96357.8	80147.2	1208.62	31345.5	34722.5	229.62	63690	42513.5	703.1	110366	174271	1180.14	50690.2	36110.9	238.52	134175	190424	2401.22	143560	106859	3238.71
1333	29266.5	20422.8	254.54	120687	117854	2465.3	79717.5	107214	1027.95	49469.2	58753.3	121.04	132935	178440	1116.95	65987.2	48431.1	1051.09	41704.5	49690.5	460.13	74634	46441.1	524.21	65010	79904.2	1752.41	37118.2	32653.2	956.75	128804	159646	1389.29	76576.5	55427.4	778.75
1334	34301.2	37709.3	340.87	78740.2	70519.1	782.31	103648	175710	7359.41	39857.2	38015.5	769.85	72001.5	99502.9	789.43	48894.8	35945.3	368.46	57419.2	59566.8	778.75	59824.5	44786.6	959.42	127761	180463	1031.51	59761.5	51199.9	2385.2	103179	120273	582.06	40355.2	36003.2	407.62
1335	45744.8	61555.1	1781.78	46998.8	37408.5	279.46	55424.2	60761.2	1270.92	67689	107880	874.87	73548	96351.4	1327.88	43391.2	32102.3	322.18	105468	160807	2116.42	53745.8	41837.1	912.25	136450	175617	4399.27	64984.5	62446	2297.09	139630	172765	2213.43	80151	88541.6	4212.37
1336	48657	53910	429.87	53455.5	18992.6	374.69	62378.2	73662.6	361.34	72133.5	64747.5	1086.69	90879.8	119771	1359.03	69446.2	56687.7	1011.93	105534	134799	3809.2	171342	136287	3026.89	66195	118115	482.38	169596	167283	2865.8	94089	126788	1609.12	116964	126359	4849.61
1337	64711.5	59038.1	1073.34	58495.5	52137.1	1051.09	118592	158347	1324.32	46027.5	63620.8	669.28	85295.2	118948	1712.36	43005	20389	353.33	40636.5	50274.3	475.26	140757	153722	2139.56	76630.5	101698	660.38	160550	147925	2581.89	77736	55924.9	171.77	141726	133541	1102.71
1338	43581	44980.6	746.71	48454.5	43896.6	234.96	105628	180552	709.33	39300.8	32422.7	64.08	153812	202942	4809.56	45236.2	28316.2	415.63	86621.2	63442.8	811.68	51966	47714.7	586.51	84018	118917	248.31	213388	167102	4652.03	199121	262143	2116.42	42888.8	48478.3	656.82
1339	54151.5	59460	1236.21	135691	154584	3725.54	57898.5	53047.6	130.83	51028.5	78851.3	1396.41	72175.5	123689	752.94	48627.8	41158.9	952.3	58499.2	79740.4	696.87	106040	91005.2	1346.57	115154	216149	2277.51	141554	147535	954.97	159225	121456	1265.58	141942	110305	7006.97
1340	39246	43317.2	433.43	71129.2	54922.8	651.48	105098	138644	1084.91	54116.2	84971	508.19	60588	84233.2	679.07	98198.2	94047.2	1278.04	62061.8	85303.8	1954.44	118496	109314	2354.94	72707.2	91837.3	606.09	90355.5	71066.5	1347.46	66375.8	74223.3	602.53	92320.5	106321	2323.79
1341	37266	36417.9	364.9	49164	29873.7	486.83	61386	79589.1	976.33	43134.8	44297.1	421.86	122267	213810	1615.35	96593.2	71671.7	1031.51	39525	41979.5	702.21	98080.5	91834.6	987.01	262143	262143	6528.15	87250.5	95480.1	746.71	79144.5	105008	781.42	66532.5	55919.6	1318.09
1342	34213.5	23490.7	230.51	43784.2	27291.8	576.72	57533.2	69779.6	698.65	44009.2	47340	396.05	86696.2	170580	844.61	38352.8	36467.8	731.58	39504.8	35767.3	790.32	164884	160236	6838.76	50494.5	86277.5	654.15	61581	42627.4	1258.46	77866.5	56422.4	437.88	108734	118835	2465.3
1343	43910.2	51221.3	426.31	51729.8	37631	563.37	113693	163185	973.66	43763.2	46602.2	261.66	117064	171081	1071.56	66243.8	49007	650.59	44513.2	54958.4	2584.56	99489	85829.8	977.22	99653.2	180098	724.46	134047	116642	1809.37	150552	165739	2184.06	98334	111443	2321.12
1344	31049.2	26442.8	262.55	49349.2	35263.6	540.23	88842.8	128239	1728.38	45810	51828.3	1364.37	75635.2	102688	591.85	49386	42520.6	678.18	59453.2	55301.9	2870.25	52755	35367.7	476.15	115461	134467	1704.35	110806	112631	1477.4	74183.2	102413	1213.07	54606	42356.9	229.62
1345	34088.2	41389.4	576.72	95117.2	68208.7	2163.59	63799.5	60244.1	435.21	61996.5	87708.6	679.96	94290	148593	1992.71	45454.5	25458.4	428.98	62826.8	63471.2	294.59	75258	102063	2113.75	98350.5	262143	5313.3	143275	98993.8	1510.33	76903.5	185821	411.18	169654	162916	13829.7
1346	42858	42449.4	751.16	83315.2	84882	792.99	111782	152967	394.27	32374.5	26160.7	104.13	137556	262143	439.66	81015.8	60917.8	752.94	35726.2	36143.8	479.71	127186	106111	2204.53	114608	177634	1341.23	101344	93566.6	875.76	70926	82720.2	491.28	69126	65580.5	655.93
1347	48915	51790	873.98	69918.8	48940.2	1296.73	72539.2	103998	698.65	36453.8	40435.4	422.75	71925	129708	255.43	79404	71252.5	792.1	53741.2	60768.3	674.62	177777	148635	4967.98	90843.8	110940	2377.19	96348	85274.5	1200.61	84775.5	155166	1473.84	114588	98024.6	1108.94
1348	38320.5	37420.9	975.44	41647.5	29944	403.17	116641	127964	875.76	33681.8	35307.2	302.6	111156	167553	1212.18	86337	68704.4	1096.48	42306	51650.3	517.09	49759.5	38840.5	1794.24	158881	222842	643.47	72109.5	71600.5	905.13	85307.2	138180	1285.16	95366.2	100308	988.79
1349	69738.8	78230.1	1228.2	89598.8	71623.6	1035.96	58734	81874.7	376.47	42792.8	38047.5	205.59	62305.5	66206.2	247.42	54449.2	46211.5	459.24	60057	56675.2	1235.32	31965	28488	276.79	78468	99833.1	122.82	76066.5	46501.6	926.49	107260	173660	2632.62	81432	66591.6	2735.86
1350	44844.8	41675.1	565.15	53692.5	33745.2	553.58	72758.2	102549	129.94	35856.8	29274.8	564.26	83505.8	143016	979	51415.5	39034.5	385.37	95401.5	146421	1846.75	53216.2	37420.1	688.86	65544.8	83027.2	1341.23	111892	73356.5	1983.81	193138	262143	7814.2	71499	57607.9	1261.13
1351	35572.5	37166.4	456.57	68464.5	45963.2	662.16	81864	160528	1053.76	106180	145345	3827	100100	143464	794.77	55995.8	40976.5	496.62	38066.2	45207.6	418.3	138563	90175.7	1733.72	59488.5	85626	600.75	79291.5	67179	1241.55	167208	262143	2494.67	48312	50406.9	255.43
1352	38937.8	49515.1	352.44	44135.2	26352	458.35	78093.8	139796	920.26	45527.2	48861.9	489.5	73086.8	110176	1447.14	83922.8	85515.6	1723.04	50493	68286.1	651.48	103583	121018	1175.69	132592	201743	1156.11	69892.5	43454.2	619.44	126268	193563	1538.81	67863.8	55836.8	690.64
1353	43689	56036.2	921.15	48460.5	38169.4	544.68	68276.2	86535.6	738.7	43656	58707.1	614.99	103021	117161	1978.47	68649.8	55425.6	449.45	56703	82820.7	897.12	115033	126327	2038.99	59567.2	56383.3	105.02	66800.2	55577.8	706.66	102366	167854	1335	97773.8	85925.9	1273.59
1354	60942	82729.1	1104.49	42956.2	24809.6	189.57	103735	157527	870.42	42612.8	43990.9	1369.71	97307.2	140597	905.13	40394.2	34498.2	712	80123.2	151672	11649.2	35820.8	50374.9	1464.94	149491	160677	2736.75	120905	84524.2	501.96	85135.5	139727	1050.2	127822	84867.7	2636.18
1355	40816.5	48937.5	567.82	78147.8	53105.4	703.99	63204	88994.7	703.1	74610.8	106686	999.47	56469	65571.6	755.61	47256.8	35751.3	434.32	150504	223511	5971.01	84608.2	60270.8	637.24	65978.2	89216.3	2095.06	48527.2	40457.6	347.99	131542	175755	3904.43	146896	84032	4726.79
1356	45492.8	57054.3	516.2	64904.2	45765.6	791.21	66919.5	76443.9	424.53	51647.2	69436	163.76	97780.5	145603	364.01	83294.2	76222.3	3294.78	129909	218645	3390.9	120970	91505.4	1973.13	91838.2	182130	10540.3	80143.5	108391	1148.1	67980	69860.5	99.68	50144.2	50364.2	2669.11
1357	55600.5	61212.4	1025.28	40693.5	33311.8	363.12	99135	129815	661.27	73245.8	74356.8	1181.03	54549.8	68209.6	412.96	42499.5	24962.7	309.72	33954	28755	233.18	43242.8	31154.4	415.63	92141.2	121060	833.04	107926	57381.9	1083.13	81874.5	175069	1667.86	138961	75880.5	1576.19
1358	40080	39038.1	420.08	44821.5	35762	353.33	61068	75987.3	779.64	46980.8	50918.7	629.23	64873.5	99189.6	477.93	78071.2	61480.3	945.18	58843.5	76459.9	605.2	33540.8	30179.9	450.34	95889.8	119562	677.29	82961.2	83226.6	673.73	74939.2	164702	3380.22	118383	108015	3463.88
1359	35274	28848.5	323.07	69284.2	47512.6	925.6	77280	101467	1984.7	48401.2	58292.3	1383.06	59739	58928.7	258.99	78027.8	61353	1002.14	48971.2	66939.6	1145.43	157782	116959	1864.55	88757.2	129152	1688.33	66730.5	56657.4	2667.33	73405.5	108705	849.95	69818.2	48442.7	3110.55
1360	93553.5	139240	5367.59	58594.5	35613.3	1375.94	85413.8	141116	936.28	42021	45313.5	367.57	95612.2	161214	1850.31	66325.5	48663.4	621.22	43119	57069.5	399.61	53859.8	45435.4	721.79	137353	172181	1111.61	64492.5	63749.8	1308.3	69022.5	50116.8	192.24	66211.5	51094.9	284.8
1361	49319.2	58114.3	336.42	50465.2	40250.2	632.79	50412.8	49905	202.92	34255.5	36559.4	350.66	66795.8	87147.9	800.11	53883	44251.7	597.19	54795.8	63632.3	663.94	97012.5	73537.1	1889.47	63446.2	69122.7	1714.14	91444.5	87576	949.63	150410	235610	7096.86	227760	262143	9927.95
1362	38225.2	33070.6	468.14	99901.5	105184	1579.75	67237.5	87037.5	1265.58	60847.5	82614.2	756.5	87822	116831	574.05	85271.2	57306.2	1257.57	29238	39466.2	946.07	207241	246629	7932.57	77307.8	107317	1391.96	77420.2	86254.4	1207.73	159326	207739	1432.01	58794	45208.4	740.48
1363	36879	26310.2	375.58	96595.5	98916.4	2077.26	89419.5	152698	1228.2	42761.2	49714.5	702.21	59559.8	63159.7	1121.4	116973	101742	1621.58	166577	171882	2127.99	70212	37012.4	314.17	88847.2	146125	378.25	98218.5	82046.4	5164.67	103770	166833	1661.63	128316	166374	2055.01
1364	54440.2	63006.7	441.44	96336	63203.3	792.1	63832.5	78290.6	453.01	44595.8	50767.4	843.72	120444	143453	1228.2	82185.8	63149.1	899.79	34757.2	42832.1	828.59	43270.5	28069.7	89	53976	32674.6	2556.97	70193.2	99359.6	1267.36	71417.2	52809	211.82	220379	194254	2082.6
1365	36707.2	37934.5	467.25	60231	43104.5	546.46	110392	173464	1267.36	50231.2	64525	671.95	56565	64404	752.05	71560.5	56054	669.28	70806.8	99235.9	2373.63	50406	50663.2	2981.5	77091.8	82287.6	1365.26	73368	63146.4	742.26	127395	132120	2548.07	71022.8	62637.3	1136.53
1366	41697	38056.4	717.34	54640.5	48239.8	550.91	125644	96938.8	2776.8	43217.2	46457.1	457.46	97320.8	131248	222.5	128116	120092	2555.19	117950	160721	1907.27	60744	63130.4	923.82	90675.8	150215	758.28	174156	153255	2299.76	130657	261224	4443.77	137750	99680	2323.79
1367	39081	42609.6	325.74	55624.5	51468.7	197.58	79012.5	113168	1050.2	60666	79972.7	740.48	59715.8	83111.8	617.66	48725.2	38986.4	431.65	39372.8	46530.1	434.32	43574.2	70892.1	412.96	72195	68255.9	3051.81	262143	262143	8791.42	179689	262143	10115.7	155122	146265	2888.94
1368	58740.8	72662.3	244.75	41427	35038.4	178.89	112522	168020	1404.42	46389.8	55504.8	372.02	52012.5	74843.7	363.12	113924	84622.1	2113.75	42074.2	53247.8	1020.83	39330.8	36662.7	760.95	95121	150585	1000.36	83000.2	78476.6	4297.81	153230	185862	2149.35	38590.5	42375.6	179.78
1369	77453.2	75116	1740.84	69731.2	66759.8	962.09	106394	136587	1781.78	60773.2	74283	996.8	52509	57273.3	166.43	71089.5	51805.1	1409.76	51001.5	93862.1	1351.91	67170	56641.4	487.72	74556.8	99810.8	318.62	59185.5	51091.3	380.03	170198	262143	2654.87	104754	107872	1283.38
1370	43931.2	52998.6	672.84	68331.8	57546.5	380.92	62133	77357.9	1078.68	119946	167818	1356.36	73443.8	110403	698.65	70779.8	55654.4	727.13	94054.5	81637.9	8063.4	58465.5	40862.6	223.39	262143	262143	3394.46	63802.5	50478.1	954.08	97083.8	161659	1171.24	224570	257061	2060.35
1371	37617	39341.6	316.84	85935	70765.7	4796.21	78114	95250.5	1353.69	35861.2	28828.9	508.19	96503.2	121917	517.98	118822	77456.7	319.51	98596.5	198607	1626.92	55365.8	52965.7	1464.94	121678	141169	1102.71	73449.8	69762.6	1046.64	141976	260339	9979.57	141074	151612	2288.19
1372	38989.5	38203.2	680.85	92477.2	50673	1298.51	142950	227298	1545.04	41721.8	34513.3	525.99	180497	210392	5469.05	73738.5	71127	962.98	36445.5	48133	936.28	172382	145534	4980.44	82723.5	140371	3012.65	184093	262143	3055.37	61435.5	85505	1608.23	59586	50432.7	1575.3
1373	33403.5	22406.6	221.61	59007	62523.4	598.97	67863	93059.3	581.17	70308	119985	2446.61	61716.8	67721	882.88	111937	93946.6	1399.08	42690.8	51462.5	990.57	44711.2	42654.1	372.91	56177.2	56690.3	1199.72	53505	46038.8	1080.46	60830.2	42245.6	289.25	96468.8	135064	1068
1374	32768.2	38152.5	260.77	67815	53108.1	1810.26	172315	207722	2832.87	92616.8	163444	2157.36	151958	262143	6795.15	81162	86338.9	348.88	33341.2	38747.9	536.67	56888.2	36947.5	1228.2	77720.2	107752	1231.76	60504.8	47267	350.66	86003.2	41255.1	306.16	60869.2	65310	1149.88
1375	43012.5	42240.3	237.63	74378.2	72949.7	968.32	76670.2	108527	1357.25	35093.2	34122.6	244.75	58248	60939.2	676.4	51975.8	40870.6	517.98	95996.2	178754	675.51	187909	169998	3590.26	108116	152750	2573.88	43089	32068.5	253.65	156832	177810	2620.16	65772.8	60141.8	1755.97
1376	46996.5	48895.7	445.89	43982.2	30128.3	458.35	58431	42743.1	299.93	55295.2	62123.8	619.44	52743	57777.9	252.76	49747.5	42723.6	460.13	46557.8	30636.5	1708.8	138409	154699	3475.45	99292.5	114652	2247.25	119414	110044	1589.54	132339	262143	11764.9	99480	164565	1789.79
1377	43162.5	42408.5	818.8	43542.8	21569.2	177.11	83931	116769	730.69	41262	30295.6	311.5	102612	159438	241.19	76093.5	65667.8	1427.56	86550.8	89461.9	1508.55	153758	117601	3720.2	78781.5	100478	342.65	45175.5	37288.3	825.03	147545	262143	1820.05	43875	39426.1	527.77
1378	73407	81071	1096.48	61039.5	45885.7	482.38	75543.8	104129	590.07	60323.2	57793.9	695.09	84464.2	120685	536.67	66117.8	46806.9	766.29	39571.5	40543.9	596.3	67851.8	42899.8	775.19	106930	110530	4150.07	94304.2	60070.6	542.01	164177	262143	8289.46	96168	104922	1722.15
1379	41408.2	42098.8	429.87	47380.5	24177.7	102.35	73118.2	125317	497.51	36156	33023.4	270.56	109022	148281	420.08	42808.5	36969.7	645.25	38301.8	41103.8	512.64	90105	70968.6	1039.52	69919.5	82656.1	735.14	73601.2	77764.6	971.88	176986	258352	4115.36	90803.2	101737	4160.75
1380	36688.5	47642.6	399.61	102610	80885	2516.03	78559.5	110805	503.74	37279.5	26035.2	469.03	150614	195566	1510.33	95006.2	77570.6	1085.8	36039.8	35239.6	356	37863.8	28092.8	198.47	117493	171952	1359.03	88056	59292.7	809.01	113672	105065	1054.65	68337.8	51581.7	841.05
1381	67261.5	93125.1	1117.84	45331.5	26597.7	453.01	85944	118215	558.03	42924	65978.4	819.69	75405.8	96548.1	582.06	41055	24449.2	676.4	42769.5	50883.1	664.83	82893	64008.8	842.83	166406	262143	2306.88	102683	60335.8	1682.99	86466.8	61560.4	576.72	68214.8	73884.2	1435.57
1382	52974	71668.1	1309.19	55388.2	38489.8	513.53	172292	192513	1685.66	32787.8	30053.5	154.86	114175	174161	1869	151735	120081	1615.35	141206	130041	3298.34	104695	86708.2	4986.67	92370.8	222204	1228.2	74772.8	78345.8	314.17	88567.5	132979	497.51	94785.8	102864	5024.94
1383	51235.5	51040.6	1734.61	66903	43058.2	821.47	85869.8	107506	708.44	36174	19240	254.54	81405	111422	844.61	72292.5	58077.8	731.58	78727.5	113165	3883.07	79933.5	70844.9	2764.34	76333.5	118385	679.07	103270	67661.4	1327.88	128092	156603	1703.46	72704.2	74896.2	891.78
1384	34961.2	32835.7	661.27	59252.2	54896.1	1643.83	56786.2	60374.9	302.6	40821.8	32774.2	328.41	50271.8	41228.4	185.12	104449	116481	1534.36	53965.5	59258	744.04	55209.8	70104.4	117.48	59404.5	71440.3	566.04	60255.8	41231.9	619.44	158426	160843	1085.8	85552.5	59249.1	2191.18
1385	38606.2	36494.4	314.17	49718.2	40462.1	384.48	226822	262143	4670.72	36759	35166.6	244.75	63801	75642	411.18	43107	27684.3	380.92	37212.8	41854.9	621.22	44996.2	27214.4	555.36	60972	81620.1	851.73	98461.5	114544	1184.59	141718	177833	2224.11	61939.5	49669.1	760.06
1386	38517	34402.1	445	42831.8	23265.5	406.73	69469.5	91795.5	545.57	50868.8	61475	565.15	79497	123245	420.08	74812.5	58803.2	2315.78	54525	67292.9	616.77	107750	58636.8	1138.31	74024.2	91018.5	1643.83	84851.2	87909.8	801.89	54659.2	38200.6	258.99	42689.2	33629.5	456.57
1387	57393.8	77231.5	750.27	65711.2	41734.8	1021.72	77535.8	100159	1381.28	39936.8	43806.7	345.32	94212	132843	734.25	43155.8	20271.5	362.23	42985.5	49630	281.24	83487	43567.3	1841.41	46057.5	68997.2	1179.25	154924	120623	8110.57	148045	209277	1618.02	96470.2	81672.6	1863.66
1388	36086.2	37491.2	227.84	78324	57491.3	1385.73	54251.2	59336.3	547.35	38790.8	28267.3	21.36	137582	152598	1262.02	69068.2	47738.7	1133.86	84684.8	98575.5	1232.65	66609.8	71497.3	327.52	88937.2	124441	5703.12	97778.2	54509.8	1237.1	110050	130834	1186.37	52015.5	42901.6	896.23
1389	43461	50729.1	653.26	46006.5	24641.4	97.01	89060.2	124739	508.19	45086.2	33640.2	1084.02	94107	107086	1000.36	142657	189828	2702.93	31062.8	37615	1084.02	86916	62454.9	1076.9	81423.8	112376	611.43	41293.5	32240.2	575.83	103304	84486.8	1041.3	262143	209826	7712.74
1390	57539.2	64731.5	722.68	57704.2	34188.5	262.55	60004.5	51292.5	881.99	59562.8	72981.8	756.5	159026	249399	2164.48	81832.5	65642.8	860.63	54097.5	101998	1058.21	39120	22674.5	69.42	90279.8	148559	1012.82	65037	53567.3	810.79	98664.8	133913	936.28	62629.5	52631	923.82
1391	43011	33737.2	404.95	61514.2	45148.8	915.81	156476	254164	1942.87	70124.2	91395	841.94	57871.5	84696.9	457.46	67033.5	68926	3562.67	67041.8	59673.6	1192.6	80122.5	79285.6	3613.4	67641.8	66293.4	165.54	107509	87959.6	3516.39	76592.2	116865	477.04	84343.5	90174.8	941.62
1392	57173.2	80161.4	193.13	85056	105097	2286.41	58300.5	87043.8	489.5	49403.2	60415.9	498.4	53699.2	55612.5	243.86	45467.2	47214.5	1335	60524.2	42908.7	251.87	56890.5	46906.6	511.75	71433.8	105933	1300.29	62511	49899.6	174.44	98970.8	148183	1610.9	123117	134715	1746.18
1393	56186.2	79656.8	814.35	78302.2	50407.8	1376.83	71990.2	100076	607.87	44094	45786.9	433.43	68670	104404	635.46	184149	101628	1793.35	68998.5	62105.1	884.66	106036	79868.6	1240.66	130850	254290	2127.1	67971	76594.3	2080.82	177700	200687	2173.38	49312.5	60554.7	565.15
1394	44184	47296.4	525.1	76225.5	52873.1	1550.38	71932.5	101423	1609.12	54498.8	60034.1	461.02	58026.8	78077.9	480.6	40271.2	27194.8	433.43	85669.5	115780	2118.2	34402.5	28471.1	664.83	173126	241878	2319.34	92058.8	80178.3	2994.85	55027.5	55291.2	456.57	87292.5	92851.9	1063.55
1395	56025.8	65102.6	664.83	116882	99761.9	1511.22	70740	80719.4	378.25	43237.5	53368.8	390.71	173069	262143	1832.51	75018.8	67575.9	900.68	31452	31940.3	364.01	106451	76230.3	1054.65	56670	55255.6	299.04	104944	117480	1222.86	48894	49193.9	580.28	90366	75122.2	4111.8
1396	67565.2	57793.9	700.43	64589.2	42524.2	646.14	64619.2	78439.3	508.19	56528.2	76764.3	750.27	65585.2	92146.1	408.51	61113.8	64007	1435.57	42607.5	47048.1	550.91	64511.2	57131.8	1213.07	59526.8	55238.7	602.53	61959.8	47844.6	1513	54925.5	28245.9	88.11	67191	48712.4	631.01
1397	61422.8	84489.5	998.58	115181	87398.9	1270.92	101381	141371	790.32	34282.5	30281.4	147.74	262143	262143	9825.6	125404	104089	1396.41	44808	65006.5	1027.95	55519.5	41967.1	1368.82	66837.8	85223.7	559.81	50363.2	48232.7	600.75	159717	262143	672.84	86187	87090.9	991.46
1398	66621.8	73693.8	1056.43	102130	65147.1	912.25	54087	48979.4	427.2	37671.8	42011.6	715.56	85437.8	118924	663.94	61356.8	59498.3	947.85	63543	117611	754.72	138222	121892	4921.7	171029	262143	11872.6	106808	96066.6	1044.86	66798	90170.4	455.68	70788.8	62141.6	2964.59
1399	50150.2	53731.1	1402.64	72984	68633.2	3526.18	63634.5	55880.4	257.21	55085.2	85127.6	1510.33	80003.2	124342	327.52	66464.2	61658.3	335.53	62920.5	92379.3	2067.47	88808.2	112200	323.07	91885.5	153909	1747.07	58533	40357.9	1473.84	61544.2	48411.6	334.64	178061	168890	4522.98
1400	36179.2	21874.4	210.93	55309.5	47763.6	625.67	149413	228571	1795.13	30487.5	21630.6	252.76	68564.2	93493.6	1694.56	103162	56265.8	1060.88	52726.5	52166.5	703.99	72292.5	50719.3	811.68	64769.2	79215.3	573.16	48984.8	53972.3	528.66	132842	162858	339.98	122240	122650	2491.11
1401	53339.2	62846.5	1623.36	81186	69221.5	969.21	58865.2	62208.3	436.1	58426.5	79453	1139.2	67345.5	56279.1	357.78	53084.2	37980.8	949.63	74215.5	76735.8	1628.7	117861	116340	1521.9	81828.8	91539.2	1173.02	240297	236515	1518.34	100454	105715	1591.32	101273	48476.5	865.97
1402	73935.8	91937	2289.97	152084	105617	1325.21	118182	172947	1797.8	120496	159991	4973.32	112684	144878	1289.61	61623	49726.1	626.56	48182.2	45617.8	631.01	53189.2	39488.4	1047.53	78453.8	104058	653.26	165055	155407	671.95	82656	114856	234.07	131725	113049	868.64
1403	37571.2	37556.2	309.72	45583.5	23535.2	495.73	105350	155155	990.57	54392.2	69112.9	647.92	103979	147258	814.35	53138.2	36494.4	1580.64	99032.2	134791	1197.94	43971.8	19555.1	296.37	57261.8	82925.8	2137.78	113574	116232	1326.1	55269.8	72974.7	518.87	99967.5	53694.6	1581.53
1404	38596.5	25098	525.1	57363	44499.1	659.49	111034	154798	1288.72	42651.8	50379.3	631.01	86835	124068	1599.33	88773.8	54858.7	731.58	60981.8	68263.9	533.11	114558	97507.5	2711.83	77656.5	103438	1880.57	105754	65830.6	1577.08	109374	180273	1200.61	97278.8	56057.5	1949.99
1405	50796.8	54849.8	169.1	67986	54029.2	675.51	128959	206378	4355.66	41934	55739.8	898.9	79227.8	120272	542.01	41385.8	37216.2	666.61	37657.5	41206.1	681.74	80628.8	70341.1	761.84	168303	171900	2706.49	72660	101228	526.88	83953.5	112849	986.12	94463.2	80341.2	1266.47
1406	49506.8	60384.7	542.01	87279	70836.9	936.28	99328.5	146214	971.88	43845.8	57712.1	443.22	73015.5	119210	685.3	124286	108342	1376.83	26952	13194.2	50.73	60696	46038.8	561.59	89506.5	138148	1183.7	95142	51515.9	939.84	58844.2	74458.3	388.04	60511.5	48056.4	525.99
1407	46617	62233.2	582.06	92350.5	59525.9	776.97	103556	142215	1960.67	53064	62525.2	2508.91	186992	262143	2766.12	64288.5	51060.2	713.78	80252.2	182546	1176.58	231782	220198	3586.7	50249.2	43470.3	380.03	115558	89223.4	1027.06	51015.8	69166.4	130.83	77616	58077.8	494.84
1408	34435.5	28078.6	76.54	70978.5	52201.2	1518.34	76171.5	86831.1	1782.67	43551.8	54160.9	622.11	63923.2	89547.4	460.13	73887	78921.6	437.88	41269.5	63185.6	138.84	62264.2	82576	2352.27	91044	138230	4105.57	85691.2	138760	809.9	60450	262143	3011.76	123736	104814	2678.01
1409	38366.2	38823.6	412.96	41092.5	33985.5	426.31	61818	74438.7	782.31	35248.5	19579.1	198.47	75028.5	111082	1749.74	67098.8	68034.3	890	83077.5	73504.2	969.21	214012	201467	1041.3	60102	71087.9	3349.96	67379.2	102306	760.95	71870.2	98180.4	182.45	74606.2	84346.2	2252.59
1410	48170.2	53990.1	200.25	67349.2	56512.3	1470.28	193090	262143	2450.17	49707	72837.6	762.73	70220.2	99195.8	908.69	67524.8	75852	816.13	148613	159444	3482.57	155882	168883	2408.34	110946	188854	1960.67	82238.2	78135.8	171.77	86744.2	143292	2225.89	76918.5	54634.4	376.47
1411	39197.2	38926.8	476.15	114907	95617.1	1637.6	58101.8	46284.4	303.49	35766	38869.9	646.14	102323	159195	387.15	43790.2	28726.5	995.02	35059.5	32942.5	350.66	68760.8	53368	1507.66	57723.8	84379.1	1073.34	127288	143054	2640.63	106972	143184	603.42	142441	138229	5529.57
1412	59179.5	46854.1	1092.92	39781.5	29080.8	364.01	75089.2	92778	1629.59	50958	63212.2	685.3	80902.5	112714	636.35	60433.5	44583.7	475.26	58617.8	64129.8	1090.25	132886	107917	3839.46	57639.8	77187	1327.88	52470.8	42652.4	855.29	97872	137861	292.81	105032	66897.7	1121.4
1413	41398.5	44480.4	532.22	38933.2	28182.7	404.06	74867.2	101811	700.43	50156.2	56850.5	552.69	45081.8	39527.6	439.66	62081.2	53894.8	538.45	87855.8	100364	1134.75	87804.8	91411	1760.42	102530	191270	3670.36	51927.8	50868.8	388.93	85133.2	104413	3338.39	81833.2	66234.7	8820.79
1414	43081.5	52934.5	130.83	74973	56903	750.27	89696.2	99732.5	777.86	65886.8	93911.9	1366.15	59073.8	67195	817.91	61653	49529.4	510.86	41025	67189.7	929.16	61395	54902.3	974.55	69288.8	74130.8	841.05	164233	131766	1893.03	121307	183278	2721.62	101403	98660.1	1509.44
1415	58769.2	70494.2	659.49	112382	95188.2	1289.61	90981	153327	1176.58	180428	262143	4843.38	81282.8	110248	824.14	174567	167180	2083.49	46804.5	50695.3	642.58	63882.8	44484.9	1457.82	78714.8	106472	869.53	80389.5	89727.1	1628.7	54268.5	80536.1	1502.32	50232.8	53720.4	450.34
1416	66627	57256.4	1125.85	48952.5	34695.8	673.73	69626.2	85803.1	1060.88	41845.5	24982.3	402.28	66783.8	89701.3	2318.45	77182.5	63843.3	943.4	43577.2	48897.5	247.42	138196	107781	3335.72	83813.2	101940	497.51	123949	113951	2869.36	61061.2	106691	798.33	108868	121017	2267.72
1417	57687.8	61313	1084.02	152729	127443	3989.87	73841.2	130095	1590.43	48550.5	74194.9	838.38	92175.8	125197	1737.28	45290.2	27991.4	548.24	41602.5	61349.5	238.52	78432	90070.7	7273.08	49768.5	45579.6	631.01	118169	82220.9	4082.43	101797	180355	261.66	49046.2	42582.9	484.16
1418	34640.2	24247.2	746.71	107008	49720.7	737.81	145977	171401	1544.15	34309.5	37913.1	380.92	73862.2	126713	1515.67	65967	49223.2	573.16	39372	26485.5	276.79	124216	89444.1	2383.42	114744	166631	2763.45	105236	89622.1	415.63	99167.2	146447	1297.62	53466.8	57296.4	953.19
1419	34649.2	42577.6	374.69	68833.5	58428.5	842.83	76089	96331.8	373.8	57519.8	58618.1	146.85	139966	171219	1341.23	44698.5	29039.8	437.88	41161.5	50347.3	542.01	63900	49387	3061.6	79623.8	118977	1479.18	104248	117238	2500.01	199542	262143	5322.2	43689	36743.6	107.69
1420	42775.5	56593.3	501.96	40449	29022.9	306.16	82355.2	123676	386.26	35049.8	26118.8	260.77	219158	262143	4021.91	76907.2	60425.7	1547.71	86744.2	83412.6	1176.58	61439.2	58898.4	839.27	110034	193626	1653.62	126894	153284	1644.72	96519.8	122233	1234.43	100731	135359	1913.5
1421	34155.8	33922.3	606.98	115108	64311.4	1732.83	88701	145780	2142.23	79369.5	98399.3	1711.47	58754.2	60582.3	374.69	85242	89151.3	4229.28	32269.5	26707.1	235.85	60900	48469.4	1464.05	79161	105374	687.08	66490.5	58598.5	674.62	101407	144991	1002.14	87723.8	64312.3	296.37
1422	84368.2	88407.3	1324.32	56942.2	50455.9	448.56	114266	195398	1129.41	47089.5	51803.3	760.06	76688.2	110189	1513.89	84804	75211.2	272.34	59061.8	95146.3	1439.13	55655.2	39138.6	1066.22	71421	100042	1022.61	49223.2	37853.5	183.34	64755	43964.2	269.67	129007	80035	1348.35
1423	65512.5	61819.4	1293.17	51012.8	46837.1	627.45	109097	174719	2182.28	35959.5	40702.4	354.22	114615	140292	1132.97	109757	91612.1	2018.52	39167.2	49106.6	1160.56	37588.5	31833.5	445	52665	62148.7	501.96	155651	139913	3553.77	67834.5	107737	2613.93	77544	121567	490.39
1424	37439.2	26650.2	290.14	38955.8	31134	683.52	98857.5	124546	1111.61	36011.2	34685.1	847.28	127639	194682	1853.87	77403	65019.8	975.44	116596	208949	7122.67	55755.8	50331.3	326.63	55694.2	63372.4	989.68	38290.5	35797.6	970.1	68326.5	86217.9	1246	82459.5	80762.2	746.71
1425	49751.2	56544.4	861.52	65106	64209.9	603.42	65964.8	72640.9	309.72	47212.5	61935.1	1358.14	60351	80274.4	845.5	45525	26257.7	554.47	53862	62635.5	454.79	105208	97399.8	1230.87	85212.8	100411	1387.51	151130	175039	2571.21	63555	89365.8	513.53	112212	150858	1388.4
1426	46586.2	62001	1253.12	56487	37992.3	841.05	200874	262143	5378.27	105593	123703	1098.26	98253.8	189915	415.63	123880	81000.7	1075.12	104769	148650	1590.43	35408.2	30080.2	261.66	39025.5	36128.7	759.17	130650	117240	710.22	148145	262143	7094.19	42640.5	52480.6	290.14
1427	43801.5	58912.7	988.79	70656.8	48826.3	677.29	87930.8	104055	665.72	164219	262143	9053.97	127796	143724	869.53	76055.2	55326	380.03	43803.8	61307.6	1054.65	68752.5	64216.2	369.35	99152.2	137019	1269.14	97036.5	83557.6	3463.88	63006.8	81837.3	518.87	64254	59874.8	502.85
1428	47277	64025.7	856.18	76690.5	60588.5	914.03	81217.5	105184	755.61	33152.2	30658.7	366.68	78520.5	146239	682.63	56502	43930.4	1813.82	42009.8	52666.6	733.36	60432	45741.6	514.42	208077	128271	465.47	70339.5	60632.1	2574.77	60424.5	99957.7	792.1	262143	227731	9961.77
1429	42355.5	46680.5	452.12	61771.5	45039.3	1004.81	92070.8	128744	1525.46	43083	63070.7	1232.65	93639	145204	2342.48	129805	137307	1359.03	91275.8	123140	500.18	62943.8	58563.8	873.09	115148	125073	3890.19	93609	87290.3	1500.54	74279.2	217835	5778.77	66708	47854.4	1164.12
1430	51283.5	51753.5	194.91	56230.5	48367.1	918.48	55941	53082.3	360.45	37262.2	40612.5	339.09	62649	88591.5	463.69	62436	53625.2	1298.51	70569.8	71001.5	978.11	77452.5	75182.8	851.73	212047	262143	2216.99	121553	108913	5178.91	251768	262143	8560.91	107186	103436	791.21
1431	42435	45860.8	657.71	41778.8	24082.5	387.15	150944	172793	987.9	44047.5	54919.2	370.24	93991.5	137736	1944.65	57005.2	39440.3	1097.37	85137	132684	340.87	46455.8	37056.9	747.6	262143	262143	18512.9	70500.8	37373.8	342.65	91245	121596	1230.87	45330	53298.5	528.66
1432	62196.8	68271	779.64	67295.2	56391.3	1561.06	86567.2	147288	2183.17	68572.5	68844.2	517.98	156242	225092	1062.66	76152.8	57867.8	648.81	46528.5	48007.5	2176.94	99786	75291.3	1971.35	209582	242427	2216.1	51870	36860.2	460.13	153852	197454	1611.79	110407	165180	1132.08
1433	44232.8	50353.5	721.79	57699	47183.3	587.4	61707	87830.5	199.36	41082.8	41227.5	426.31	67032.8	77211.1	720.9	48078	34205.4	261.66	35950.5	42545.6	652.37	44328	28982	547.35	78307.5	104506	657.71	41649	30310.7	626.56	82607.2	50868.8	286.58	117151	135559	1737.28
1434	71938.5	90918.8	998.58	67544.2	49141.3	1095.59	71443.5	104555	1183.7	59193.8	64464.5	1462.27	83785.5	136970	591.85	112701	78578.1	2592.57	44331.8	50082.1	1555.72	63042	45241.4	1100.93	53835.8	98221.3	1192.6	72923.2	55433.6	810.79	91096.5	137106	1205.06	85033.5	103249	4690.3
1435	32837.2	28793.3	1302.96	58653	41982.2	399.61	136526	133094	784.98	39106.5	41051.2	752.94	90849	159009	1011.93	60460.5	46737.5	159.31	54423	55054.5	984.34	71292	60091.9	712.89	140933	185723	3897.31	121270	101864	2483.99	214940	262143	9222.18	182344	194447	2377.19
1436	50363.2	55061.6	252.76	56495.2	41657.3	421.86	102232	128875	2121.76	50523	61869.2	631.01	102705	143356	970.1	60313.5	68455.2	1656.29	54926.2	71244.5	1741.73	60138.8	48708.8	669.28	55716.8	73595	433.43	89866.5	83966.2	409.4	62680.5	75436.4	1918.84	57980.2	44887.1	522.43
1437	46044.8	52885.6	531.33	58240.5	48017.3	946.07	103028	120554	952.3	55356	72792.2	1064.44	64269.8	75674.9	329.3	59808	51817.6	143.29	48175.5	47463.7	1414.21	60309	57546.5	1331.44	109989	122727	2141.34	78155.2	92209.3	749.38	76613.2	123476	760.06	163242	104432	12339.8
1438	50532.8	53542.4	1220.19	49482	43262.9	538.45	82500	103719	888.22	51558	70327.8	645.25	122927	249909	2228.56	64410.8	45229.8	572.27	46128	54357.6	535.78	85492.5	67368.5	2031.87	97388.2	126370	1761.31	73812	87129.2	1233.54	154360	235329	5546.48	60968.2	65253.9	690.64
1439	49195.5	64469.8	415.63	59133.8	47459.2	523.32	64176	90294.1	1298.51	53369.2	72599.1	237.63	56039.2	57834.9	375.58	109748	98025.5	1169.46	115144	103448	1401.75	135357	103867	5027.61	80517	96054.1	1213.96	77688.8	106745	1352.8	84512.2	133484	820.58	206578	225944	3621.41
1440	38820.8	44426.1	49.84	44326.5	27102.3	102.35	118085	200444	975.44	47557.5	50189.8	203.81	49048.5	41967.9	159.31	66325.5	60509.3	589.18	86765.2	111650	1439.13	114223	69088.9	1196.16	74543.2	194477	844.61	142323	115388	8207.58	70194	113856	946.07	76340.2	59428	267
1441	36045	35128.3	464.58	68012.2	65771.9	980.78	128888	160351	2637.96	115190	145081	1895.7	59529	66447.4	853.51	78855.8	74380.9	1496.09	38190	44709.1	1361.7	35757.8	46723.2	635.46	53296.5	72547.5	1827.17	128229	126074	2231.23	106728	158450	1439.13	131476	164108	2025.64
1442	37824	56482.1	450.34	71442	52061.4	765.4	115580	170029	1272.7	38782.5	39093.2	639.91	84418.5	94543.8	645.25	74511	73791.7	151.3	56006.2	58343.9	427.2	47733	45024.2	415.63	123957	209530	5644.38	51770.2	39526.7	851.73	72210.8	98999.1	911.36	59363.2	54004.3	827.7
1443	30333.8	30377.5	309.72	48807.8	33035.9	505.52	117622	128189	947.85	48224.2	61118.1	420.97	138639	159853	1237.1	56950.5	45887.5	1071.56	27502.5	54313.1	130.83	74379.8	57348.9	832.15	132964	186375	2593.46	71502	60216.5	893.56	52020.8	65579.6	738.7	68679	80028.8	1566.4
1444	45870	62163.8	1150.77	75358.5	58093	1258.46	104547	123002	610.54	47961	55348.2	143.29	70217.2	92665.9	826.81	51600.8	26372.5	341.76	42129	49465.3	1281.6	49005	38857.4	1262.91	48588	55590.3	525.99	98572.5	63703.5	1449.81	197806	262143	2645.08	74519.2	61066.5	1737.28
1445	35269.5	26464.2	667.5	66074.2	47987.9	-21.36	53589.8	51831.8	592.74	47643.8	58324.4	417.41	128856	215902	1044.86	91124.2	75682.9	2038.99	53811.8	54587.3	1071.56	207203	144248	5605.22	57321	71707.3	720.01	61337.2	48605.6	231.4	94620.8	65157.8	159.31	95479.5	96430.6	731.58
1446	93361.5	99377.4	1343.01	71337	58370.6	998.58	53848.5	70002.1	488.61	42549	41511.4	56.96	64956	68449.9	542.9	57921	41036.1	776.08	52584.8	76628.1	1793.35	51866.2	46924.4	1402.64	86029.5	131912	5760.97	171415	140969	546.46	112612	194381	3402.47	81021.8	70805.7	477.04
1447	57040.5	61263.1	565.15	68658.8	51256.9	474.37	119164	158005	1287.83	59982	106832	869.53	60066.8	86842.6	544.68	127746	85650.9	1513	125501	136973	3333.94	262143	262143	11084.1	80781.8	79712.9	219.83	50907.8	38861	817.91	74743.5	87935.6	1089.36	50541	36658.2	971.88
1448	38550	47078.3	502.85	78892.5	72677.4	569.6	68681.2	79370.2	697.76	37788	32544.6	228.73	55989	75357.2	189.57	39567	19079.8	355.11	71397	111268	1189.04	74829.8	66517.7	1143.65	152912	225275	1869	57727.5	58651.9	1047.53	50537.2	38921.5	210.93	73977.8	41154.5	905.13
1449	42645	37688.8	679.07	99789	71257.9	955.86	51500.2	41943	105.91	36464.2	38223.7	514.42	97661.2	105172	848.17	41574.8	25309.8	375.58	88277.2	137346	1320.76	90451.5	89842.8	952.3	66260.2	84603.4	742.26	53086.5	42206.5	395.16	98738.2	203679	981.67	48996	23131.1	1626.92
1450	40733.2	43859.2	1100.93	45213	32709.3	386.26	58411.5	67533.2	726.24	67542.8	38057.3	148.63	59420.2	68204.3	438.77	56616	39506.2	517.98	43860	57651.5	307.94	102209	98410.9	1771.99	38066.2	44221.4	736.03	169375	201559	2783.03	105186	121252	1389.29	43618.5	36214.1	451.23
1451	37140	33887.6	640.8	58836	52051.6	727.13	93558	122413	1614.46	37368	44833.8	695.98	143655	254690	1360.81	127943	87443.4	1024.39	65142	75073.3	1034.18	122687	103840	2595.24	114368	201377	2243.69	114694	64019.5	1270.92	80164.5	107356	332.86	51797.2	41364.5	784.09
1452	69426.8	70645.5	1486.3	41354.2	30695.2	194.91	59534.2	61119	89.89	80407.5	98094.9	2053.23	84261.8	97690.9	1326.99	45562.5	22979.8	356.89	106259	148355	1608.23	84889.5	70187.2	1664.3	107127	176666	1187.26	71220	70159.6	1012.82	91104.8	126578	308.83	97173	86581	1845.86
1453	67655.2	85470.3	1652.73	51290.2	37363.1	961.2	54162.8	75722.1	556.25	41260.5	58670.6	514.42	112110	234120	1543.26	53621.2	43181.9	1560.17	58532.2	71454.5	854.4	79302	59272.2	909.58	100690	139630	566.93	57307.5	49789.3	711.11	97467.8	142487	959.42	44948.2	42342.6	308.83
1454	40324.5	37909.6	964.76	84896.2	62187	150.41	73670.2	100827	1464.94	57644.2	74817	740.48	64113.8	91940.6	717.34	118128	102847	2113.75	42666	50758.5	477.04	57721.5	42744	474.37	86180.2	103903	909.58	130276	111286	1130.3	210119	262143	2945.9	227007	153298	3446.97
1455	75534	94016.9	1093.81	70496.2	61423.3	1311.86	71244	94461	723.57	45863.2	53772	537.56	63439.5	84248.3	882.88	42552	31848.7	310.61	37556.2	58751.6	547.35	75251.2	81739.4	1030.62	55932.8	87826.1	2780.36	68041.5	78642.2	4117.14	157900	194493	5948.76	76554	54415.5	247.42
1456	46998	57756.6	754.72	44415	29389.6	558.03	59172.8	70872.5	777.86	36729.8	34363.8	130.83	63447	83609.3	707.55	115127	91972.6	2712.72	39003	51076.2	493.95	148238	130092	1815.6	93918	184446	1244.22	120551	120511	893.56	71723.2	106910	802.78	70200	58426.7	2534.72
[truncated: 48,880 more rows]

## Sheet: Fig 1E
Figure 1E: Relative PM GFP-P4C fluorescence in Wild type, tcb1/2/3D, scs2/22 ist2D and Dtether cells
[truncated: 57 more rows]
[truncated: 24 more columns]

## Sheet: Fig 1F
Figure 1F: Relative PM GFP-2xPH(PLCd) fluorescence in Wild type, tcb1/2/3D, scs2/22 ist2D and Dtether cells
[truncated: 57 more rows]
[truncated: 24 more columns]
