# Supplementary material for: Tricalbin proteins regulate plasma membrane phospholipid homeostasis
Source: Life Sci Alliance. 2022 Apr 19;5(8):e202201430. doi: 10.26508/lsa.202201430 (PMC9018018; doi:10.26508/lsa.202201430)
Supplement: Supplementary file 10 [file LSA-2022-01430_TableS3.xlsx]

## Sheet: lipotype_results_processed
Supplemental table 3: Glycerolipid Composition of Wild type, tcb1/2/3Δ, and sfk1Δ Cells Following 10min Incubation at 42oC, Related to Figure 5.
%mol of total lipids
feature	class	structuralcategory	functionalcategory	totallength	totaldb	totaloh	fullname	sfk1D-42-1	sfk1D-42-2	sfk1D-42-3	sfk1D-42-4	tcb123D-42-1	tcb123D-42-2	tcb123D-42-3	tcb123D-42-4	wildtype-42-1	wildtype-42-2	wildtype-42-3	wildtype-42-4
							shortname	p9	p10	p11	p12	p5	p6	p7	p8	p1	p2	p3	p4
							cohort	sfk1-42	sfk1-42	sfk1-42	sfk1-42	tcb123-42	tcb123-42	tcb123-42	tcb123-42	wildtype-42	wildtype-42	wildtype-42	wildtype-42
DAG 30:0;0	DAG	GL	MEM	30	0	0		NA	NA	0.129338	NA	NA	0.129957	NA	NA	NA	NA	NA	NA
DAG 30:1;0	DAG	GL	MEM	30	1	0		0.079101	0.0880369	0.110519	NA	NA	NA	NA	NA	NA	0.0971434	0.109934	0.118518
DAG 32:0;0	DAG	GL	MEM	32	0	0		0.115392	0.131282	0.215836	0.324817	NA	0.266459	NA	NA	NA	NA	0.139357	0.156137
DAG 32:1;0	DAG	GL	MEM	32	1	0		0.561322	0.561796	0.573511	NA	0.637806	0.531716	0.565598	NA	0.701068	0.721009	0.835489	0.789265
DAG 32:2;0	DAG	GL	MEM	32	2	0		0.662036	0.621448	0.568707	0.577377	0.529487	0.494054	0.587177	NA	0.680966	0.674797	0.65953	0.713984
DAG 33:0;0	DAG	GL	MEM	33	0	0		0.0531946	NA	NA	0.278219	NA	NA	NA	NA	NA	NA	NA	NA
DAG 33:1;0	DAG	GL	MEM	33	1	0		NA	NA	0.116562	NA	NA	NA	NA	NA	NA	NA	NA	NA
DAG 34:0;0	DAG	GL	MEM	34	0	0		0.964379	1.22899	0.973045	2.15725	1.29148	1.0738	1.48547	1.3963	1.70256	1.37218	1.35623	1.56426
DAG 34:1;0	DAG	GL	MEM	34	1	0		1.42046	1.28985	1.14391	1.10916	1.38979	1.01324	1.15758	1.16934	1.42144	1.33289	1.49622	1.28889
DAG 34:2;0	DAG	GL	MEM	34	2	0		1.359	1.18696	1.01982	1.09188	1.08382	1.01758	1.10724	1.04886	1.2383	1.40714	1.10741	1.17232
DAG 35:1;0	DAG	GL	MEM	35	1	0		NA	0.0709737	0.096507	NA	0.194455	NA	NA	NA	NA	NA	NA	NA
DAG 36:0;0	DAG	GL	MEM	36	0	0		3.38842	4.52648	3.61641	8.10272	5.0363	4.14156	5.2374	5.47677	6.32123	4.90194	5.19365	5.61748
DAG 36:1;0	DAG	GL	MEM	36	1	0		0.794389	1.13432	1.36416	0.96223	2.11873	0.701557	0.991041	1.3221	0.909837	0.829775	0.987416	0.704917
DAG 36:2;0	DAG	GL	MEM	36	2	0		0.325985	0.339547	0.382071	0.259397	0.392799	0.256343	0.255314	0.254903	0.26586	0.282879	0.247305	0.223805
DAG 38:0;0	DAG	GL	MEM	38	0	0		NA	0.0728196	NA	NA	0.212886	NA	NA	NA	0.125457	0.0798276	0.0874239	0.0841999
DAG 40:0;0	DAG	GL	MEM	40	0	0		NA	0.0743317	NA	NA	NA	NA	NA	NA	0.144045	0.0764213	0.0772414	NA
DAG 40:10;0	DAG	GL	MEM	40	10	0		NA	NA	NA	NA	NA	NA	NA	NA	NA	NA	0.159856	NA
DAG 40:11;0	DAG	GL	MEM	40	11	0		NA	NA	NA	NA	NA	NA	NA	NA	NA	NA	3.42326	NA
EE 16:0;0	EE	STE	STO	16	0	0		0.949783	0.957156	0.814085	0.762286	0.855593	NA	1.0823	1.14678	1.21114	1.11011	1.17802	1.11944
EE 16:1;0	EE	STE	STO	16	1	0		5.49973	5.08197	4.74729	4.77631	4.98616	1.45067	5.44961	5.21314	5.32928	5.65379	5.21031	6.03968
EE 18:1;0	EE	STE	STO	18	1	0		4.64172	3.65634	3.10459	2.99204	4.01916	0.985642	3.75673	3.40327	4.11077	4.12623	3.49722	3.80998
EE 18:2;0	EE	STE	STO	18	2	0		0.322361	0.301614	NA	NA	NA	NA	NA	NA	NA	0.234442	NA	0.337959
EE 20:1;0	EE	STE	STO	20	1	0		NA	NA	NA	NA	0.447492	NA	NA	NA	NA	NA	NA	NA
PA 32:1;0	PA	GPL	MEM	32	1	0		0.110033	0.130208	0.125491	0.210702	0.279493	0.258451	0.327449	0.357961	0.143916	0.120688	0.163913	0.15846
PA 32:2;0	PA	GPL	MEM	32	2	0		0.220158	0.224721	0.210764	0.315336	0.20019	0.180587	0.21166	0.250829	0.0939107	0.0855644	0.0818262	0.0865525
PA 34:1;0	PA	GPL	MEM	34	1	0		0.213542	0.210342	0.198318	0.291317	0.747244	0.62148	0.717262	0.786186	0.257897	0.205784	0.256153	0.22623
PA 34:2;0	PA	GPL	MEM	34	2	0		0.35054	0.305056	0.279545	0.449046	0.780948	0.671856	0.744127	0.837634	0.169284	0.153379	0.137966	0.132513
PC 28:0;0	PC	GPL	MEM	28	0	0		0.0470253	0.0446718	0.0505833	0.0769713	0.05368	0.0622371	0.056207	0.0710715	0.0594507	0.0500653	0.0605976	0.0592595
PC 28:1;0	PC	GPL	MEM	28	1	0		0.934433	0.942611	1.38014	2.81307	1.70998	1.61744	1.83776	2.78948	1.49529	1.22644	1.29768	1.15093
PC 30:2;0	PC	GPL	MEM	30	2	0		0.141271	0.154785	0.180485	0.248967	0.167726	0.148367	0.198483	0.210673	0.207052	0.198841	0.254928	0.264545
PC 32:1;0	PC	GPL	MEM	32	1	0		1.18853	1.128	1.09385	1.33663	1.12114	1.06045	1.10937	1.30322	1.22726	1.19965	1.23392	1.20315
PC 32:2;0	PC	GPL	MEM	32	2	0		5.03315	4.95151	4.76291	6.17346	4.92002	4.7449	5.42274	5.73517	5.5579	5.43092	5.78933	5.61873
PC 34:1;0	PC	GPL	MEM	34	1	0		0.873593	0.713802	0.628313	0.693211	0.612551	0.621959	0.591977	0.767641	0.666574	0.733075	0.612915	0.560318
PC 34:2;0	PC	GPL	MEM	34	2	0		7.14553	6.00484	5.23767	6.38666	5.71739	5.53168	5.5217	6.09653	7.07621	7.28445	6.47628	6.08766
PC 34:3;0	PC	GPL	MEM	34	3	0		0.0751904	0.0612641	0.0618271	0.0676049	0.0582043	0.0532794	0.0505992	0.0644645	0.0832452	0.0927806	0.0712341	0.071544
PC 36:1;0	PC	GPL	MEM	36	1	0		0.250613	0.15668	0.147216	0.165652	0.147006	0.167991	0.170731	0.155713	0.163153	0.204338	NA	0.138755
PC 36:2;0	PC	GPL	MEM	36	2	0		1.20817	0.827572	0.630596	0.735829	0.767849	0.736328	0.643941	0.730578	1.05371	1.1071	0.787364	0.743621
PE 28:0;0	PE	GPL	MEM	28	0	0		0.0354101	0.0346795	0.0335952	0.0552552	0.0302413	0.0340988	0.0382247	0.0501366	0.0348581	0.0337521	0.0405761	0.0416139
PE 28:1;0	PE	GPL	MEM	28	1	0		0.052799	0.0518357	0.0592553	0.0410818	0.0424296	0.0241634	0.0468544	0.0516466	0.0580425	0.0589911	0.0667494	0.0676483
PE 30:1;0	PE	GPL	MEM	30	1	0		0.0885311	0.09245	0.0946189	0.113044	0.083331	0.0700829	0.0847568	0.121872	0.0982854	0.0951536	0.120994	0.107331
PE 30:2;0	PE	GPL	MEM	30	2	0		0.0156393	NA	NA	NA	NA	NA	NA	0.0239987	NA	0.0159644	0.0178904	0.0169142
PE 31:1;0	PE	GPL	MEM	31	1	0		0.0815175	0.0182156	0.0629616	0.018865	NA	0.01621	0.0201928	0.0687077	0.0729407	0.0667096	0.084268	0.0750151
PE 32:1;0	PE	GPL	MEM	32	1	0		0.875436	0.86763	0.869742	0.940463	0.777465	0.676295	0.745677	0.782632	0.984147	0.947075	1.15411	1.1255
PE 32:2;0	PE	GPL	MEM	32	2	0		1.94028	1.92922	1.78258	1.97203	1.72592	1.54272	1.74176	1.72014	2.05738	2.02977	2.23541	2.26181
PE 33:2;0	PE	GPL	MEM	33	2	0		0.105504	0.0948422	0.0961509	0.124647	0.115021	0.0807718	0.0847185	0.0986356	0.133464	0.12621	0.193632	0.160359
PE 34:1;0	PE	GPL	MEM	34	1	0		1.79209	1.68947	1.48986	1.63439	1.37198	1.19396	1.27457	1.26588	1.74853	1.78697	1.89954	1.90413
PE 34:2;0	PE	GPL	MEM	34	2	0		6.85663	5.87383	5.06141	5.30917	4.918	4.53966	4.8058	4.66198	6.44863	6.62328	6.27569	6.24566
PE 34:3;0	PE	GPL	MEM	34	3	0		0.0443128	0.038188	0.0353179	0.032007	0.0302299	0.0248426	0.0314114	0.0421391	0.0348618	0.0460773	0.0436959	0.0436355
PE 35:2;0	PE	GPL	MEM	35	2	0		0.215087	0.195729	0.16579	0.185649	NA	0.152616	0.148276	0.166395	0.251304	0.236028	0.344737	0.265483
PE 36:2;0	PE	GPL	MEM	36	2	0		1.06017	0.846856	0.703142	0.726349	0.831783	0.683803	0.663998	0.724603	0.846391	0.886775	0.902442	0.837201
PG 28:2;0	PG	GPL	MEM	28	2	0		0.0131248	NA	0.0109679	NA	0.0109791	0.0139564	0.0146739	0.0150272	0.0186738	0.0134272	0.0128142	0.0117622
PG 34:1;0	PG	GPL	MEM	34	1	0		0.0320791	0.0267338	0.0225556	0.0281435	0.0288178	0.0216201	0.0210628	0.0295045	0.0281626	0.0315601	0.0327552	0.0317598
PG 34:2;0	PG	GPL	MEM	34	2	0		0.0262144	0.0229356	0.021956	0.0190072	0.0136671	0.0245401	0.0204522	0.0199659	0.0230746	0.0244545	0.0182005	0.020929
PI 26:0;0	PI	GPL	MEM	26	0	0		0.670485	0.823104	1.18047	1.85524	1.49415	1.20564	1.80884	2.2867	0.877445	0.767209	1.53357	1.16803
PI 26:1;0	PI	GPL	MEM	26	1	0		NA	0.136602	0.185472	0.276905	0.255582	0.200962	0.314587	0.404376	NA	0.15536	0.292786	0.23651
PI 28:0;0	PI	GPL	MEM	28	0	0		0.715124	0.802291	1.04555	1.62808	1.12345	1.00969	1.44487	1.72513	0.767863	0.701777	1.07155	0.90394
PI 28:1;0	PI	GPL	MEM	28	1	0		0.183024	0.201417	0.243358	0.363179	0.251883	0.261729	0.335656	0.384698	0.211462	0.220679	0.276783	0.241513
PI 30:0;0	PI	GPL	MEM	30	0	0		0.156606	0.17827	0.21715	0.349514	0.221017	0.200325	0.262643	0.31628	0.1582	0.147559	0.209341	0.203986
PI 30:1;0	PI	GPL	MEM	30	1	0		0.25879	0.317077	0.351651	0.514363	0.345531	0.330416	0.45982	0.490372	0.337876	0.311081	0.379659	0.338671
PI 30:2;0	PI	GPL	MEM	30	2	0		NA	NA	0.0320334	0.0583871	0.036554	NA	NA	NA	0.0354725	0.0356806	0.0344837	NA
PI 31:1;0	PI	GPL	MEM	31	1	0		0.0856181	NA	0.0712069	NA	NA	0.0497623	0.0785867	0.0491163	NA	0.0472632	0.0735558	0.0308685
PI 32:1;0	PI	GPL	MEM	32	1	0		2.40929	2.77809	2.82954	4.18781	3.0123	2.76011	3.65951	4.14737	2.80951	2.74711	2.95927	2.83026
PI 32:2;0	PI	GPL	MEM	32	2	0		0.620841	0.680656	0.671409	0.879124	0.687267	0.68358	0.892716	0.928076	0.732799	0.754492	0.702907	0.70146
PI 33:1;0	PI	GPL	MEM	33	1	0		0.0948802	0.0939422	0.0724302	0.112112	0.0673072	0.0851724	0.0942668	0.110435	0.0997647	0.105469	0.0801475	0.0616564
PI 34:1;0	PI	GPL	MEM	34	1	0		5.83511	6.00844	5.28007	7.5817	6.15605	5.71312	6.8267	7.56481	6.17877	5.98744	5.32471	5.31357
PI 34:2;0	PI	GPL	MEM	34	2	0		1.70131	1.557	1.34907	1.8084	1.49737	1.52544	1.67311	1.88023	1.66812	1.73055	1.30875	1.29277
PI 36:1;0	PI	GPL	MEM	36	1	0		1.65843	1.47109	1.27108	1.72483	1.49003	1.45686	1.63603	1.66597	1.65943	1.58528	1.23685	1.28986
PI 36:2;0	PI	GPL	MEM	36	2	0		0.268849	0.199135	0.166687	0.221112	0.195942	0.231804	0.211629	0.217228	0.241413	0.262121	0.152529	0.160029
PS 28:0;0	PS	GPL	MEM	28	0	0		NA	NA	0.0457178	NA	0.0337619	NA	NA	NA	0.0359179	0.0334342	0.0501627	NA
PS 28:1;0	PS	GPL	MEM	28	1	0		NA	NA	0.0322562	NA	NA	NA	NA	NA	0.0248556	NA	NA	NA
PS 30:1;0	PS	GPL	MEM	30	1	0		0.0557012	NA	0.0725955	NA	0.0642257	0.0574541	0.065567	0.0697061	0.0605828	0.0600295	0.06262	0.069054
PS 31:1;0	PS	GPL	MEM	31	1	0		NA	NA	NA	NA	NA	NA	NA	NA	NA	NA	0.017058	NA
PS 32:1;0	PS	GPL	MEM	32	1	0		0.824754	0.960853	0.901133	1.28955	0.731687	0.689523	0.817014	0.953695	0.979331	0.978757	1.02221	1.02818
PS 32:2;0	PS	GPL	MEM	32	2	0		0.436351	0.518596	0.497906	0.677501	0.479081	0.40471	0.467435	0.536503	0.446819	0.450353	0.467643	0.484924
PS 33:1;0	PS	GPL	MEM	33	1	0		0.0668016	NA	0.0861501	NA	NA	NA	NA	NA	0.0820674	0.0788361	0.082175	0.0670043
PS 34:1;0	PS	GPL	MEM	34	1	0		2.43945	2.78559	2.17694	2.93089	1.93563	1.72038	1.86693	2.14651	2.90944	2.87169	2.55668	2.50509
PS 34:2;0	PS	GPL	MEM	34	2	0		2.55628	2.56533	2.14131	2.83928	2.02883	1.85769	2.0788	2.21554	2.60141	2.58481	2.27412	2.21803
PS 36:1;0	PS	GPL	MEM	36	1	0		0.0386953	NA	NA	NA	NA	0.0506103	NA	NA	0.0524512	0.0449423	0.0287889	NA
PS 36:2;0	PS	GPL	MEM	36	2	0		0.0647239	0.0606872	0.0482798	NA	NA	0.087182	NA	NA	0.0528699	0.0568655	0.0422496	NA
TAG 34:0;0	TAG	GL	STO	34	0	0		NA	0.0643811	NA	NA	0.0571905	NA	NA	NA	NA	NA	NA	NA
TAG 35:0;0	TAG	GL	STO	35	0	0		NA	NA	NA	NA	NA	0.5411	NA	NA	NA	NA	NA	NA
TAG 35:1;0	TAG	GL	STO	35	1	0		NA	NA	NA	NA	NA	0.055358	NA	NA	NA	NA	NA	NA
TAG 36:0;0	TAG	GL	STO	36	0	0		NA	0.138559	NA	0.249241	0.10747	4.81665	0.129985	NA	0.104032	0.0808358	0.0905108	0.0977806
TAG 36:1;0	TAG	GL	STO	36	1	0		NA	NA	0.527657	NA	NA	0.833017	NA	NA	NA	NA	NA	NA
TAG 36:2;0	TAG	GL	STO	36	2	0		NA	NA	0.0647929	NA	NA	0.107032	NA	NA	NA	NA	NA	NA
TAG 38:0;0	TAG	GL	STO	38	0	0		0.177807	NA	NA	NA	NA	NA	NA	NA	NA	NA	NA	NA
TAG 38:1;0	TAG	GL	STO	38	1	0		NA	0.062266	0.991811	NA	NA	NA	NA	NA	NA	NA	NA	NA
TAG 39:1;0	TAG	GL	STO	39	1	0		NA	NA	0.110822	NA	NA	0.14956	NA	NA	NA	NA	NA	NA
TAG 40:0;0	TAG	GL	STO	40	0	0		0.112101	0.0588452	1.16024	0.101526	0.0581304	1.63058	NA	NA	NA	NA	NA	NA
TAG 40:1;0	TAG	GL	STO	40	1	0		0.0624836	0.102771	0.66069	0.0925104	0.107049	1.04985	0.0966105	0.0742531	0.088009	0.0837414	0.115608	0.122266
TAG 40:2;0	TAG	GL	STO	40	2	0		NA	0.0359083	0.172571	NA	NA	0.330073	NA	NA	NA	NA	NA	0.0412502
TAG 41:0;0	TAG	GL	STO	41	0	0		NA	NA	0.173542	NA	NA	0.20809	NA	NA	NA	NA	NA	NA
TAG 41:1;0	TAG	GL	STO	41	1	0		NA	NA	0.065595	NA	NA	0.0786919	NA	NA	NA	NA	NA	NA
TAG 42:0;0	TAG	GL	STO	42	0	0		NA	NA	0.941851	NA	NA	1.32578	NA	NA	NA	NA	NA	NA
TAG 42:1;0	TAG	GL	STO	42	1	0		0.290429	0.422141	0.732503	0.427353	0.452966	0.893144	0.42408	0.412493	0.39542	0.342235	0.511928	0.584297
TAG 42:2;0	TAG	GL	STO	42	2	0		0.233814	0.351759	0.376026	0.308516	NA	0.419731	0.351037	0.321403	0.272335	0.261464	0.353505	0.446982
TAG 43:0;0	TAG	GL	STO	43	0	0		0.0313863	0.0347753	0.174276	0.0825535	NA	0.196241	NA	NA	NA	NA	NA	NA
TAG 43:1;0	TAG	GL	STO	43	1	0		NA	NA	0.0807283	NA	NA	0.0916954	NA	NA	NA	NA	NA	NA
TAG 44:0;0	TAG	GL	STO	44	0	0		NA	NA	0.770278	NA	NA	1.01021	NA	NA	NA	NA	NA	NA
TAG 44:1;0	TAG	GL	STO	44	1	0		0.41201	0.529603	0.838818	NA	NA	NA	NA	NA	NA	NA	0.632992	0.701022
TAG 44:2;0	TAG	GL	STO	44	2	0		NA	0.55813	0.586532	NA	0.563002	0.607361	0.591922	NA	0.470602	0.512213	0.585743	0.678003
TAG 45:0;0	TAG	GL	STO	45	0	0		NA	NA	0.197	NA	NA	0.222128	NA	NA	NA	NA	NA	NA
TAG 45:1;0	TAG	GL	STO	45	1	0		NA	0.0595532	0.12383	NA	NA	0.107785	NA	NA	NA	NA	NA	NA
TAG 46:0;0	TAG	GL	STO	46	0	0		NA	NA	0.581356	NA	NA	0.969468	NA	NA	NA	NA	NA	NA
TAG 46:1;0	TAG	GL	STO	46	1	0		0.294807	0.434227	0.687746	0.332388	0.478003	0.811099	0.399959	0.369801	0.371182	0.363621	0.439288	0.457389
TAG 46:2;0	TAG	GL	STO	46	2	0		0.529604	0.642089	0.65611	0.607561	0.615946	0.65349	0.650315	0.618568	0.561241	0.648715	0.64274	0.7332
TAG 46:3;0	TAG	GL	STO	46	3	0		0.10046	0.136885	0.142087	0.132408	0.125819	0.13917	0.140547	0.104572	0.103704	0.10081	0.10981	0.143093
TAG 47:1;0	TAG	GL	STO	47	1	0		NA	0.100226	0.171575	NA	0.198053	0.160037	0.0604459	NA	NA	0.0354714	0.0472726	NA
TAG 47:2;0	TAG	GL	STO	47	2	0		0.0484005	0.0881729	0.105607	NA	0.1211	0.0902632	0.0979515	NA	0.0434753	0.0663098	0.048417	0.0498383
TAG 48:0;0	TAG	GL	STO	48	0	0		NA	NA	0.432288	NA	NA	0.690789	NA	NA	NA	NA	NA	NA
TAG 48:1;0	TAG	GL	STO	48	1	0		NA	0.489729	0.812425	NA	0.643891	0.997663	NA	NA	NA	NA	0.499907	0.53706
TAG 48:2;0	TAG	GL	STO	48	2	0		1.71605	2.01495	1.86739	NA	1.84958	1.73353	1.98298	NA	1.72541	1.88452	1.83973	2.19596
TAG 48:3;0	TAG	GL	STO	48	3	0		2.22839	2.51498	2.22148	2.23233	2.34824	2.15607	2.41773	2.16468	1.7276	1.87381	1.6615	2.14939
TAG 49:1;0	TAG	GL	STO	49	1	0		NA	0.0780329	0.166141	NA	0.181535	0.158826	0.0671192	0.0889549	NA	0.0454557	NA	NA
TAG 49:2;0	TAG	GL	STO	49	2	0		0.100465	0.155876	0.139181	NA	0.200215	0.135037	0.128603	0.130472	0.0934255	0.116564	0.0972228	0.0907504
TAG 49:3;0	TAG	GL	STO	49	3	0		0.115832	0.124257	0.10226	0.0882138	0.107999	0.108087	0.0780056	NA	0.0969739	0.0897085	NA	0.0782388
TAG 50:1;0	TAG	GL	STO	50	1	0		NA	0.449106	0.815799	NA	NA	1.08995	NA	NA	NA	NA	0.442694	0.466944
TAG 50:2;0	TAG	GL	STO	50	2	0		3.01335	3.20657	2.76027	NA	3.06258	2.81563	3.32184	3.0811	2.89626	2.9656	2.66563	3.13362
TAG 50:3;0	TAG	GL	STO	50	3	0		6.33459	6.32725	5.25497	5.35429	5.80386	5.31899	6.20945	5.69929	4.75039	5.0516	4.11999	5.111
TAG 50:4;0	TAG	GL	STO	50	4	0		0.0896668	0.0834896	0.0837485	NA	0.0976799	0.074802	0.0790659	0.076353	0.0660713	0.0812897	0.0563957	0.0665169
TAG 51:1;0	TAG	GL	STO	51	1	0		NA	0.0376185	0.0921397	NA	0.100455	0.114539	NA	NA	NA	NA	NA	NA
TAG 51:2;0	TAG	GL	STO	51	2	0		0.0716417	0.0820019	0.103794	NA	0.116127	0.100704	0.0657264	0.073473	0.0673809	0.0781251	0.0418586	0.0527987
TAG 51:3;0	TAG	GL	STO	51	3	0		0.111617	0.103036	0.0844167	NA	0.090482	0.061819	0.0632197	NA	0.0628907	0.10268	0.0394406	0.0593084
TAG 52:1;0	TAG	GL	STO	52	1	0		0.276724	0.292245	0.425328	NA	NA	0.548964	0.300905	NA	NA	NA	NA	NA
TAG 52:2;0	TAG	GL	STO	52	2	0		2.10412	1.96886	1.72997	1.55322	2.05449	2.05394	1.94524	1.90872	1.7768	1.89473	1.42854	1.73902
TAG 52:3;0	TAG	GL	STO	52	3	0		4.55399	4.02009	3.13986	3.11326	3.60754	3.19518	3.58381	3.48392	3.14309	3.49982	2.5238	2.95372
TAG 52:4;0	TAG	GL	STO	52	4	0		0.0919455	0.0855694	0.0700661	NA	0.08984	0.103183	0.0802454	NA	0.0554749	0.0878848	0.0568137	0.0682528
TAG 54:0;0	TAG	GL	STO	54	0	0		0.0613365	0.0994344	0.107312	0.229104	0.090023	0.0987233	0.085942	0.13188	0.0967156	0.0856487	0.0847018	0.0794908
TAG 54:1;0	TAG	GL	STO	54	1	0		0.132771	0.151895	0.201929	0.161916	0.577927	0.16724	0.153799	0.189861	0.148209	0.143472	0.139455	0.1333
TAG 54:2;0	TAG	GL	STO	54	2	0		0.801855	0.616407	0.560701	0.48307	0.751373	0.601278	0.566234	0.543735	0.543243	0.556269	0.452681	0.488808
TAG 54:3;0	TAG	GL	STO	54	3	0		0.757917	0.58119	0.481699	0.434058	0.674482	0.538699	0.50346	0.527815	0.471533	0.578191	0.362784	0.414853
TAG 56:1;0	TAG	GL	STO	56	1	0		0.288201	0.295117	0.328966	NA	0.667915	NA	0.356294	0.560949	0.362633	0.330854	0.273115	0.298191
TAG 56:2;0	TAG	GL	STO	56	2	0		0.190076	0.191948	0.187231	NA	0.363851	NA	0.140472	0.155649	0.131475	0.14212	0.120062	0.129375
TAG 56:3;0	TAG	GL	STO	56	3	0		0.0824146	0.0917138	0.10068	NA	0.197999	NA	0.0715467	0.0918612	0.0562136	0.0746023	0.0691556	0.0486666
TAG 58:1;0	TAG	GL	STO	58	1	0		0.297645	0.282906	0.263276	NA	NA	0.27185	0.32079	NA	0.433868	0.366173	NA	0.352074
TAG 58:2;0	TAG	GL	STO	58	2	0		0.275168	0.251044	0.244349	0.138633	0.351504	0.176559	0.196662	0.206426	0.169557	0.197533	0.194294	0.183219
TAG 60:1;0	TAG	GL	STO	60	1	0		NA	NA	0.0760724	NA	0.06737	NA	NA	NA	0.0960457	0.0924741	NA	NA
TAG 60:2;0	TAG	GL	STO	60	2	0		0.405142	0.317776	0.287332	NA	0.378924	0.346859	0.298532	0.328302	0.278073	0.339729	0.223478	0.26828
	sfk1-42	sfk1-42	sfk1-42	sfk1-42	AVG	STD		tcb123D-42-1	tcb123D-42-2	tcb123D-42-3	tcb123D-42-4	AVG	STD		wildtype-42-1	wildtype-42-2	wildtype-42-3	wildtype-42-4	AVG	STD
DAG	9.72368	11.3268	10.3104	14.863	11.556	1.99362		12.8876	9.62628	11.3868	10.6683	11.1422	1.18625		13.5108	11.776	15.8803	12.4338	13.4002	1.56006
EE	11.4136	9.99708	8.66596	8.53063	9.65182	1.16748		10.3084	2.43631	10.2886	9.7632	8.19913	3.33435		10.6512	11.1246	9.88555	11.3071	10.7421	0.549414
PA	0.894272	0.870328	0.814119	1.2664	0.96128	0.178548		2.00788	1.73237	2.0005	2.23261	1.99334	0.177212		0.665007	0.565416	0.639857	0.603755	0.618509	0.0375979
PC	16.8975	14.9857	14.1736	18.6981	16.1887	1.75407		15.2756	14.7446	15.6035	17.9245	15.8871	1.21561		17.5899	17.5276	16.5842	15.8985	16.9001	0.702234
PE	13.1634	11.7329	10.4544	11.153	11.6259	0.996423		9.92641	9.03923	9.68624	9.77877	9.60766	0.339177		12.7688	12.9528	13.3797	13.1523	13.0634	0.227482
PG	0.0714182	0.0496693	0.0554795	0.0471507	0.0559294	0.00943874		0.053464	0.0601166	0.0561889	0.0644976	0.0585668	0.00416141		0.0699109	0.0694419	0.0637699	0.064451	0.0668934	0.00279829
PI	14.6584	15.2471	14.9672	21.5608	16.6083	2.86685		16.8344	15.7146	19.699	22.1708	18.6047	2.51996		15.7781	15.5591	15.6369	14.7731	15.4368	0.391144
PS	6.48276	6.89105	6.00228	7.73722	6.77833	0.636748		5.27321	4.86755	5.29575	5.92195	5.33961	0.376929		7.24574	7.15972	6.6037	6.37228	6.84536	0.367876
TAG	26.3942	28.7334	34.2351	16.1222	26.3712	6.56629		27.3606	41.1565	25.9605	21.3445	28.9555	7.38758		21.6593	23.1743	20.9711	25.154	22.7397	1.60568
Total Lipids	99.6992	99.8341	99.6786	99.9784				99.9275	99.3776	99.9771	99.8691				99.9387	99.9089	99.6451	99.7592

## Sheet: PS
%mol of total lipids
feature		class	structuralcategory	functionalcategory	totallength	totaldb	totaloh		sfk1-42	sfk1-42	sfk1-42	sfk1-42	AVG	STD		tcb123-42	tcb123-42	tcb123-42	tcb123-42	AVG	STD		wildtype-42	wildtype-42	wildtype-42	wildtype-42	AVG	STD
PS 30:1;0	PS	GPL	MEM	30	1	0			0.0557012	NA	0.0725955	NA	0.0641484	0.00844715		0.0642257	0.0574541	0.065567	0.0697061	0.0642382	0.00440702		0.0605828	0.0600295	0.06262	0.069054	0.0630716	0.00358615
PS 32:1;0	PS	GPL	MEM	32	1	0			0.824754	0.960853	0.901133	1.28955	0.994073	0.177284		0.731687	0.689523	0.817014	0.953695	0.79798	0.100954		0.979331	0.978757	1.02221	1.02818	1.00212	0.0231725
PS 32:2;0	PS	GPL	MEM	32	2	0			0.436351	0.518596	0.497906	0.677501	0.532589	0.0889664		0.479081	0.40471	0.467435	0.536503	0.471932	0.0467962		0.446819	0.450353	0.467643	0.484924	0.462435	0.0151881
PS 33:1;0	PS	GPL	MEM	33	1	0			0.0668016	NA	0.0861501	NA	0.0764759	0.00967427		NA	NA	NA	NA	#DIV/0!	#DIV/0!		0.0820674	0.0788361	0.082175	0.0670043	0.0775207	0.00621812
PS 34:1;0	PS	GPL	MEM	34	1	0			2.43945	2.78559	2.17694	2.93089	2.58322	0.294774		1.93563	1.72038	1.86693	2.14651	1.91736	0.15345		2.90944	2.87169	2.55668	2.50509	2.71072	0.181255
PS 34:2;0	PS	GPL	MEM	34	2	0			2.55628	2.56533	2.14131	2.83928	2.52555	0.249295		2.02883	1.85769	2.0788	2.21554	2.04521	0.128037		2.60141	2.58481	2.27412	2.21803	2.41959	0.174747
PS 36:1;0	PS	GPL	MEM	36	1	0			0.0386953	NA	NA	NA	0.0386953	0		NA	0.0506103	NA	NA	0.0506103	0		0.0524512	0.0449423	0.0287889	NA	0.0420608	0.00987263
PS 36:2;0	PS	GPL	MEM	36	2	0			0.0647239	0.0606872	0.0482798	NA	0.057897	0.00699719		NA	0.087182	NA	NA	0.087182	0		0.0528699	0.0568655	0.0422496	NA	0.0506617	0.00616785
total lipid in class:									6.41803	6.83037	5.87603	7.73722	6.71541	0.68013		5.23945	4.78036	5.29575	5.92195	5.30938	0.406258		7.1321	7.06942	6.49423	6.37228	6.76701	0.337254
%mol of class									sfk1-42	sfk1-42	sfk1-42	sfk1-42	AVG	STD		tcb123-42	tcb123-42	tcb123-42	tcb123-42	AVG	STD		wildtype-42	wildtype-42	wildtype-42	wildtype-42	AVG	STD
PS 30:1;0	PS	GPL	MEM	30	1	0			0.867886		1.23545		1.05167	0.183783		1.22581	1.20188	1.23811	1.17708	1.21072	0.0233861		0.849438	0.849144	0.96424	1.08366	0.936621	0.0970017
PS 32:1;0	PS	GPL	MEM	32	1	0			12.8506	14.0674	15.3357	16.6668	14.7301	1.42212		13.965	14.4241	15.4277	16.1044	14.9803	0.83727		13.7313	13.845	15.7402	16.1352	14.8629	1.08458
PS 32:2;0	PS	GPL	MEM	32	2	0			6.79883	7.5925	8.47351	8.75639	7.90531	0.769634		9.14372	8.4661	8.82661	9.05957	8.874	0.262588		6.26491	6.37044	7.2009	7.6099	6.86154	0.563996
PS 33:1;0	PS	GPL	MEM	33	1	0			1.04084		1.46613		1.25349	0.212643						#DIV/0!	#DIV/0!		1.15068	1.11517	1.26535	1.0515	1.14567	0.077698
PS 34:1;0	PS	GPL	MEM	34	1	0			38.0093	40.7824	37.0477	37.8804	38.43	1.40746		36.9433	35.9885	35.2534	36.2466	36.108	0.604476		40.7936	40.6213	39.3685	39.3123	40.0239	0.686527
PS 34:2;0	PS	GPL	MEM	34	2	0			39.8297	37.5577	36.4414	36.6963	37.6313	1.33493		38.7222	38.8608	39.2541	37.4123	38.5624	0.692052		36.4746	36.5633	35.0175	34.8074	35.7157	0.807288
PS 36:1;0	PS	GPL	MEM	36	1	0			0.602915				0.602915	0			1.05871			1.05871	0		0.735424	0.635729	0.4433		0.604818	0.121246
PS 36:2;0	PS	GPL	MEM	36	2	0			1.00847	0.888491	0.82164		0.9062	0.0772937			1.82375			1.82375	0		0.741295	0.804388	0.650571		0.732084	0.0631324
								Total	100	100	100	100				100	100	100	100				100	100	100	100

## Sheet: PE
%mol of total lipids
feature		class	structuralcategory	functionalcategory	totallength	totaldb	totaloh		sfk1-42	sfk1-42	sfk1-42	sfk1-42	AVG	STD		tcb123-42	tcb123-42	tcb123-42	tcb123-42	AVG	STD		wildtype-42	wildtype-42	wildtype-42	wildtype-42	AVG	STD
PE 28:0;0	PE	GPL	MEM	28	0	0			0.0354101	0.0346795	0.0335952	0.0552552	0.039735	0.00898384		0.0302413	0.0340988	0.0382247	0.0501366	0.0381753	0.00746057		0.0348581	0.0337521	0.0405761	0.0416139	0.0377001	0.00343704
PE 28:1;0	PE	GPL	MEM	28	1	0			0.052799	0.0518357	0.0592553	0.0410818	0.051243	0.00652342		0.0424296	0.0241634	0.0468544	0.0516466	0.0412735	0.0104024		0.0580425	0.0589911	0.0667494	0.0676483	0.0628578	0.00436555
PE 30:1;0	PE	GPL	MEM	30	1	0			0.0885311	0.09245	0.0946189	0.113044	0.0971609	0.00942588		0.083331	0.0700829	0.0847568	0.121872	0.0900106	0.0192643		0.0982854	0.0951536	0.120994	0.107331	0.105441	0.0100313
PE 30:2;0	PE	GPL	MEM	30	2	0			0.0156393	NA	NA	NA	0.0156393	0		NA	NA	NA	0.0239987	0.0239987	0		NA	0.0159644	0.0178904	0.0169142	0.016923	0.000786321
PE 31:1;0	PE	GPL	MEM	31	1	0			0.0815175	0.0182156	0.0629616	0.018865	0.0453899	0.0276405		NA	0.01621	0.0201928	0.0687077	0.0350368	0.0238643		0.0729407	0.0667096	0.084268	0.0750151	0.0747333	0.00629649
PE 32:1;0	PE	GPL	MEM	32	1	0			0.875436	0.86763	0.869742	0.940463	0.888318	0.0302412		0.777465	0.676295	0.745677	0.782632	0.745517	0.0423966		0.984147	0.947075	1.15411	1.1255	1.05271	0.0886549
PE 32:2;0	PE	GPL	MEM	32	2	0			1.94028	1.92922	1.78258	1.97203	1.90603	0.0729852		1.72592	1.54272	1.74176	1.72014	1.68264	0.0811648		2.05738	2.02977	2.23541	2.26181	2.14609	0.103405
PE 33:2;0	PE	GPL	MEM	33	2	0			0.105504	0.0948422	0.0961509	0.124647	0.105286	0.0119103		0.115021	0.0807718	0.0847185	0.0986356	0.0947866	0.0134352		0.133464	0.12621	0.193632	0.160359	0.153416	0.0264756
PE 34:1;0	PE	GPL	MEM	34	1	0			1.79209	1.68947	1.48986	1.63439	1.65145	0.109118		1.37198	1.19396	1.27457	1.26588	1.2766	0.0633362		1.74853	1.78697	1.89954	1.90413	1.83479	0.0684271
PE 34:2;0	PE	GPL	MEM	34	2	0			6.85663	5.87383	5.06141	5.30917	5.77526	0.690273		4.918	4.53966	4.8058	4.66198	4.73136	0.143124		6.44863	6.62328	6.27569	6.24566	6.39832	0.151228
PE 34:3;0	PE	GPL	MEM	34	3	0			0.0443128	0.038188	0.0353179	0.032007	0.0374564	0.00452258		0.0302299	0.0248426	0.0314114	0.0421391	0.0321558	0.00627321		0.0348618	0.0460773	0.0436959	0.0436355	0.0420676	0.00427526
PE 35:2;0	PE	GPL	MEM	35	2	0			0.215087	0.195729	0.16579	0.185649	0.190564	0.0177901		NA	0.152616	0.148276	0.166395	0.155763	0.00772423		0.251304	0.236028	0.344737	0.265483	0.274388	0.0419303
PE 36:2;0	PE	GPL	MEM	36	2	0			1.06017	0.846856	0.703142	0.726349	0.83413	0.14145		0.831783	0.683803	0.663998	0.724603	0.726047	0.0648399		0.846391	0.886775	0.902442	0.837201	0.868202	0.0271759
total lipid in class:									13.1634	11.7329	10.4544	11.153	11.6259	0.996423		9.92641	9.03923	9.68624	9.77877	9.60766	0.339177		12.7688	12.9528	13.3797	13.1523	13.0634	0.227482
%mol of class									sfk1-42	sfk1-42	sfk1-42	sfk1-42	AVG	STD		tcb123-42	tcb123-42	tcb123-42	tcb123-42	AVG	STD		wildtype-42	wildtype-42	wildtype-42	wildtype-42	AVG	STD
PE 28:0;0	PE	GPL	MEM	28	0	0			0.269004	0.295574	0.321349	0.495431	0.34534	0.0886098		0.304655	0.377231	0.394629	0.512709	0.397306	0.0746861		0.272994	0.260578	0.303265	0.3164	0.28831	0.0224518
PE 28:1;0	PE	GPL	MEM	28	1	0			0.401105	0.441796	0.566797	0.368349	0.444512	0.0752429		0.427442	0.267317	0.483721	0.528151	0.426658	0.0986754		0.454564	0.455432	0.498884	0.514346	0.480807	0.0263826
PE 30:1;0	PE	GPL	MEM	30	1	0			0.672554	0.787953	0.905061	1.01358	0.844786	0.127492		0.839488	0.77532	0.875023	1.24629	0.934029	0.183789		0.76973	0.73462	0.904309	0.816059	0.806179	0.0635929
PE 30:2;0	PE	GPL	MEM	30	2	0			0.118809				0.118809	0					0.245416	0.245416	0			0.123251	0.133713	0.128602	0.128522	0.0042714
PE 31:1;0	PE	GPL	MEM	31	1	0			0.619273	0.155252	0.602249	0.169148	0.38648	0.224415			0.17933	0.208469	0.702621	0.363473	0.240109		0.571241	0.515022	0.629818	0.570357	0.571609	0.0405957
PE 32:1;0	PE	GPL	MEM	32	1	0			6.65053	7.39482	8.31937	8.43241	7.69928	0.727078		7.83229	7.48178	7.69831	8.00338	7.75394	0.19074		7.70743	7.31176	8.62577	8.55742	8.05059	0.559316
PE 32:2;0	PE	GPL	MEM	32	2	0			14.7399	16.4427	17.0509	17.6817	16.4788	1.09536		17.3872	17.067	17.9818	17.5905	17.5066	0.331807		16.1125	15.6706	16.7074	17.1971	16.4219	0.57937
PE 33:2;0	PE	GPL	MEM	33	2	0			0.801491	0.808341	0.919715	1.11761	0.91179	0.127763		1.15873	0.893569	0.874628	1.00867	0.983901	0.113226		1.04523	0.974385	1.44721	1.21925	1.17152	0.182409
PE 34:1;0	PE	GPL	MEM	34	1	0			13.6142	14.3993	14.251	14.6543	14.2297	0.383542		13.8215	13.2087	13.1585	12.9452	13.2835	0.326024		13.6937	13.7961	14.1972	14.4775	14.0411	0.314463
PE 34:2;0	PE	GPL	MEM	34	2	0			52.0886	50.0627	48.4141	47.6033	49.5422	1.71662		49.5446	50.2218	49.6147	47.6746	49.2639	0.954638		50.5029	51.1341	46.9044	47.4872	49.0072	1.83663
PE 34:3;0	PE	GPL	MEM	34	3	0			0.336636	0.325477	0.337827	0.286982	0.321731	0.0206323		0.304541	0.274831	0.324288	0.430925	0.333646	0.058858		0.273022	0.355734	0.326582	0.331771	0.321777	0.0302201
PE 35:2;0	PE	GPL	MEM	35	2	0			1.63398	1.6682	1.58584	1.66457	1.63815	0.0329965			1.68838	1.53079	1.70159	1.64025	0.0775896		1.96811	1.82222	2.57656	2.01853	2.09636	0.286465
PE 36:2;0	PE	GPL	MEM	36	2	0			8.05394	7.21776	6.72579	6.51262	7.12753	0.592853		8.37949	7.56483	6.85506	7.40997	7.55234	0.54562		6.62857	6.84622	6.74484	6.36543	6.64627	0.179499
								Total	100	100	100	100	100	1.58882e-14		100	100	100	100	100	1.00486e-14		100	100	100	100	100	7.10543e-15

## Sheet: PC
%mol of total lipids
feature		class	structuralcategory	functionalcategory	totallength	totaldb	totaloh		sfk1-42	sfk1-42	sfk1-42	sfk1-42	AVG	STD		tcb123-42	tcb123-42	tcb123-42	tcb123-42	AVG	STD		wildtype-42	wildtype-42	wildtype-42	wildtype-42	AVG	STD
PC 28:0;0	PC	GPL	MEM	28	0	0			0.0470253	0.0446718	0.0505833	0.0769713	0.0548129	0.0129651		0.05368	0.0622371	0.056207	0.0710715	0.0607989	0.00669624		0.0594507	0.0500653	0.0605976	0.0592595	0.0573433	0.00423297
PC 28:1;0	PC	GPL	MEM	28	1	0			0.934433	0.942611	1.38014	2.81307	1.51756	0.769389		1.70998	1.61744	1.83776	2.78948	1.98867	0.468923		1.49529	1.22644	1.29768	1.15093	1.29258	0.128021
PC 30:2;0	PC	GPL	MEM	30	2	0			0.141271	0.154785	0.180485	0.248967	0.181377	0.0414873		0.167726	0.148367	0.198483	0.210673	0.181312	0.0246316		0.207052	0.198841	0.254928	0.264545	0.231342	0.0287448
PC 32:1;0	PC	GPL	MEM	32	1	0			1.18853	1.128	1.09385	1.33663	1.18675	0.0929393		1.12114	1.06045	1.10937	1.30322	1.14855	0.092155		1.22726	1.19965	1.23392	1.20315	1.216	0.0148381
PC 32:2;0	PC	GPL	MEM	32	2	0			5.03315	4.95151	4.76291	6.17346	5.23026	0.553308		4.92002	4.7449	5.42274	5.73517	5.20571	0.394143		5.5579	5.43092	5.78933	5.61873	5.59922	0.128992
PC 34:1;0	PC	GPL	MEM	34	1	0			0.873593	0.713802	0.628313	0.693211	0.72723	0.0902001		0.612551	0.621959	0.591977	0.767641	0.648532	0.0696168		0.666574	0.733075	0.612915	0.560318	0.64322	0.0640518
PC 34:2;0	PC	GPL	MEM	34	2	0			7.14553	6.00484	5.23767	6.38666	6.19367	0.687909		5.71739	5.53168	5.5217	6.09653	5.71682	0.232664		7.07621	7.28445	6.47628	6.08766	6.73115	0.47546
PC 34:3;0	PC	GPL	MEM	34	3	0			0.0751904	0.0612641	0.0618271	0.0676049	0.0664716	0.0056123		0.0582043	0.0532794	0.0505992	0.0644645	0.0566369	0.00527862		0.0832452	0.0927806	0.0712341	0.071544	0.079701	0.00897029
PC 36:1;0	PC	GPL	MEM	36	1	0			0.250613	0.15668	0.147216	0.165652	0.18004	0.0412634		0.147006	0.167991	0.170731	0.155713	0.16036	0.00956163		0.163153	0.204338	NA	0.138755	0.168749	0.0270651
PC 36:2;0	PC	GPL	MEM	36	2	0			1.20817	0.827572	0.630596	0.735829	0.850542	0.217922		0.767849	0.736328	0.643941	0.730578	0.719674	0.0459691		1.05371	1.1071	0.787364	0.743621	0.922949	0.159335
total lipid in class:									16.8975	14.9857	14.1736	18.6981	16.1887	1.75407		15.2756	14.7446	15.6035	17.9245	15.8871	1.21561		17.5899	17.5276	16.5842	15.8985	16.9001	0.702234
%mol of class									sfk1-42	sfk1-42	sfk1-42	sfk1-42	AVG	STD		tcb123-42	tcb123-42	tcb123-42	tcb123-42	AVG	STD		wildtype-42	wildtype-42	wildtype-42	wildtype-42	AVG	STD
PC 28:0;0	PC	GPL	MEM	28	0	0			0.278297	0.298096	0.356884	0.411654	0.336233	0.0522632		0.351411	0.422099	0.36022	0.396504	0.382559	0.0284038		0.337983	0.285636	0.365393	0.372736	0.340437	0.0341876
PC 28:1;0	PC	GPL	MEM	28	1	0			5.53001	6.29006	9.73741	15.0447	9.15055	3.75421		11.1942	10.9697	11.7778	15.5624	12.376	1.86313		8.50086	6.99715	7.82475	7.23922	7.64049	0.580755
PC 30:2;0	PC	GPL	MEM	30	2	0			0.836049	1.03288	1.27339	1.33151	1.11846	0.197783		1.09801	1.00624	1.27204	1.17533	1.13791	0.097877		1.17711	1.13444	1.53717	1.66396	1.37817	0.227368
PC 32:1;0	PC	GPL	MEM	32	1	0			7.03377	7.52713	7.71752	7.14851	7.35673	0.276974		7.33944	7.19214	7.10976	7.27059	7.22798	0.085877		6.97711	6.84431	7.44033	7.56768	7.20736	0.303695
PC 32:2;0	PC	GPL	MEM	32	2	0			29.7863	33.0415	33.6041	33.0166	32.3621	1.50558		32.2085	32.1805	34.7534	31.9962	32.7846	1.13956		31.5972	30.9849	34.9086	35.3412	33.208	1.93519
PC 34:1;0	PC	GPL	MEM	34	1	0			5.16995	4.76321	4.43298	3.7074	4.51838	0.536068		4.01001	4.2182	3.79387	4.28262	4.07618	0.191614		3.78953	4.18239	3.69576	3.52434	3.79801	0.241439
PC 34:2;0	PC	GPL	MEM	34	2	0			42.2875	40.0704	36.9537	34.1568	38.3671	3.082		37.4284	37.5165	35.3875	34.0122	36.0862	1.46944		40.2289	41.5598	39.0508	38.2908	39.7826	1.2368
PC 34:3;0	PC	GPL	MEM	34	3	0			0.444979	0.408816	0.436213	0.361561	0.412892	0.0324998		0.381029	0.361348	0.324281	0.359644	0.356575	0.020452		0.473257	0.529339	0.429529	0.450004	0.470532	0.0373106
PC 36:1;0	PC	GPL	MEM	36	1	0			1.48313	1.04553	1.03866	0.88593	1.11331	0.222844		0.962363	1.13933	1.09418	0.868715	1.01615	0.107114		0.927542	1.16581		0.872755	0.988701	0.127214
PC 36:2;0	PC	GPL	MEM	36	2	0			7.14999	5.5224	4.44909	3.93532	5.2642	1.23016		5.02665	4.99387	4.1269	4.07585	4.55582	0.45495		5.99046	6.31628	4.74766	4.6773	5.43293	0.73002
								Total	100	100	100	100				100	100	100	100				100	100	100	100

## Sheet: PI
%mol of total lipids
feature		class	structuralcategory	functionalcategory	totallength	totaldb	totaloh		sfk1-42	sfk1-42	sfk1-42	sfk1-42	AVG	STD		tcb123-42	tcb123-42	tcb123-42	tcb123-42	AVG	STD		wildtype-42	wildtype-42	wildtype-42	wildtype-42	AVG	STD
PI 26:0;0	PI	GPL	MEM	26	0	0			0.670485	0.823104	1.18047	1.85524	1.13233	0.456575		1.49415	1.20564	1.80884	2.2867	1.69883	0.400883		0.877445	0.767209	1.53357	1.16803	1.08656	0.29672
PI 26:1;0	PI	GPL	MEM	26	1	0			NA	0.136602	0.185472	0.276905	0.19966	0.0581501		0.255582	0.200962	0.314587	0.404376	0.293877	0.0753966		NA	0.15536	0.292786	0.23651	0.228219	0.0564092
PI 28:0;0	PI	GPL	MEM	28	0	0			0.715124	0.802291	1.04555	1.62808	1.04776	0.356259		1.12345	1.00969	1.44487	1.72513	1.32578	0.280405		0.767863	0.701777	1.07155	0.90394	0.861282	0.141599
PI 28:1;0	PI	GPL	MEM	28	1	0			0.183024	0.201417	0.243358	0.363179	0.247745	0.0701416		0.251883	0.261729	0.335656	0.384698	0.308491	0.0546273		0.211462	0.220679	0.276783	0.241513	0.237609	0.0251006
PI 30:0;0	PI	GPL	MEM	30	0	0			0.156606	0.17827	0.21715	0.349514	0.225385	0.0748768		0.221017	0.200325	0.262643	0.31628	0.250066	0.0443297		0.1582	0.147559	0.209341	0.203986	0.179771	0.0272198
PI 30:1;0	PI	GPL	MEM	30	1	0			0.25879	0.317077	0.351651	0.514363	0.36047	0.0948452		0.345531	0.330416	0.45982	0.490372	0.406535	0.0696122		0.337876	0.311081	0.379659	0.338671	0.341822	0.0245059
PI 32:1;0	PI	GPL	MEM	32	1	0			2.40929	2.77809	2.82954	4.18781	3.05118	0.675956		3.0123	2.76011	3.65951	4.14737	3.39483	0.544418		2.80951	2.74711	2.95927	2.83026	2.83654	0.0771846
PI 32:2;0	PI	GPL	MEM	32	2	0			0.620841	0.680656	0.671409	0.879124	0.713008	0.0985729		0.687267	0.68358	0.892716	0.928076	0.79791	0.113186		0.732799	0.754492	0.702907	0.70146	0.722914	0.0221101
PI 33:1;0	PI	GPL	MEM	33	1	0			0.0948802	0.0939422	0.0724302	0.112112	0.0933412	0.0140744		0.0673072	0.0851724	0.0942668	0.110435	0.0892953	0.015589		0.0997647	0.105469	0.0801475	0.0616564	0.0867594	0.0172704
PI 34:1;0	PI	GPL	MEM	34	1	0			5.83511	6.00844	5.28007	7.5817	6.17633	0.854832		6.15605	5.71312	6.8267	7.56481	6.56517	0.700187		6.17877	5.98744	5.32471	5.31357	5.70112	0.387947
PI 34:2;0	PI	GPL	MEM	34	2	0			1.70131	1.557	1.34907	1.8084	1.60394	0.172082		1.49737	1.52544	1.67311	1.88023	1.64404	0.151828		1.66812	1.73055	1.30875	1.29277	1.50005	0.200586
PI 36:1;0	PI	GPL	MEM	36	1	0			1.65843	1.47109	1.27108	1.72483	1.53136	0.176744		1.49003	1.45686	1.63603	1.66597	1.56222	0.0901728		1.65943	1.58528	1.23685	1.28986	1.44286	0.18237
PI 36:2;0	PI	GPL	MEM	36	2	0			0.268849	0.199135	0.166687	0.221112	0.213946	0.0371432		0.195942	0.231804	0.211629	0.217228	0.214151	0.0128357		0.241413	0.262121	0.152529	0.160029	0.204023	0.048375
total lipid in class:									14.5727	15.2471	14.8639	21.5024	16.5465	2.87123		16.7979	15.6648	19.6204	22.1217	18.5512	2.51478		15.7427	15.4761	15.5288	14.7422	15.3725	0.377301
%mol of class								% of class	sfk1-42	sfk1-42	sfk1-42	sfk1-42	AVG	STD		tcb123-42	tcb123-42	tcb123-42	tcb123-42	AVG	STD		wildtype-42	wildtype-42	wildtype-42	wildtype-42	AVG	STD
PI 26:0;0	PI	GPL	MEM	26	0	0			4.60095	5.39842	7.94186	8.62809	6.64233	1.68423		8.89485	7.69644	9.2192	10.3369	9.03685	0.940782		5.57368	4.95737	9.87563	7.92299	7.08242	1.95581
PI 26:1;0	PI	GPL	MEM	26	1	0				0.895923	1.2478	1.28779	1.14384	0.17606		1.52152	1.28288	1.60337	1.82796	1.55893	0.194907			1.00387	1.88543	1.6043	1.49787	0.36768
PI 28:0;0	PI	GPL	MEM	28	0	0			4.90727	5.26192	7.03414	7.57165	6.19375	1.13228		6.68805	6.44557	7.36411	7.79835	7.07402	0.536826		4.8776	4.53458	6.90038	6.13163	5.61105	0.952644
PI 28:1;0	PI	GPL	MEM	28	1	0			1.25594	1.32102	1.63724	1.68902	1.4758	0.189619		1.49949	1.67081	1.71075	1.73901	1.65501	0.0930035		1.34324	1.42593	1.78238	1.63824	1.54745	0.173135
PI 30:0;0	PI	GPL	MEM	30	0	0			1.07465	1.16921	1.46092	1.62547	1.33256	0.221061		1.31574	1.27882	1.33862	1.42973	1.34073	0.0556388		1.00491	0.953459	1.34808	1.38368	1.17253	0.194608
PI 30:1;0	PI	GPL	MEM	30	1	0			1.77585	2.07959	2.3658	2.39212	2.15334	0.250046		2.05699	2.10929	2.34358	2.21671	2.18164	0.109803		2.14624	2.01007	2.44486	2.29729	2.22461	0.162759
PI 32:1;0	PI	GPL	MEM	32	1	0			16.5328	18.2204	19.0363	19.4761	18.3164	1.12398		17.9326	17.6198	18.6516	18.748	18.238	0.476072		17.8465	17.7506	19.0566	19.1983	18.463	0.667178
PI 32:2;0	PI	GPL	MEM	32	2	0			4.26029	4.46416	4.51704	4.0885	4.3325	0.170395		4.09139	4.36379	4.54994	4.19533	4.30011	0.173935		4.65486	4.8752	4.52646	4.75816	4.70367	0.128625
PI 33:1;0	PI	GPL	MEM	33	1	0			0.65108	0.616131	0.487288	0.521395	0.568974	0.0668983		0.400689	0.543717	0.480454	0.499216	0.481019	0.0517577		0.633722	0.681494	0.51612	0.418229	0.562391	0.10271
PI 34:1;0	PI	GPL	MEM	34	1	0			40.0413	39.4071	35.5227	35.2598	37.5577	2.18002		36.6478	36.471	34.7939	34.1964	35.5273	1.05536		39.2486	38.6882	34.2892	36.0431	37.0673	2.0095
PI 34:2;0	PI	GPL	MEM	34	2	0			11.6746	10.2117	9.07611	8.41022	9.84317	1.23812		8.91406	9.73797	8.52742	8.49948	8.91973	0.500016		10.5962	11.182	8.42783	8.76914	9.7438	1.17013
PI 36:1;0	PI	GPL	MEM	36	1	0			11.3803	9.64833	8.55143	8.02156	9.40041	1.28487		8.87034	9.30017	8.33843	7.53093	8.50997	0.659967		10.541	10.2434	7.96485	8.74942	9.37466	1.05989
PI 36:2;0	PI	GPL	MEM	36	2	0			1.84488	1.30605	1.12142	1.02832	1.32517	0.316266		1.16647	1.47977	1.07862	0.981969	1.17671	0.186747		1.5335	1.69371	0.98223	1.08551	1.32374	0.297599
								Total	100	100	100	100				100	100	100	100				100	100	100	100

## Sheet: EE
%mol of total lipids
feature		class	structuralcategory	functionalcategory	totallength	totaldb	totaloh		sfk1-42	sfk1-42	sfk1-42	sfk1-42	AVG	STD		tcb123-42	tcb123-42	tcb123-42	tcb123-42	AVG	STD		wildtype-42	wildtype-42	wildtype-42	wildtype-42	AVG	STD
EE 16:0;0	EE	STE	STO	16	0	0			0.949783	0.957156	0.814085	0.762286	0.870828	0.084687		0.855593		1.0823	1.14678	1.02822	0.124874		1.21114	1.11011	1.17802	1.11944	1.15468	0.041713
EE 16:1;0	EE	STE	STO	16	1	0			5.49973	5.08197	4.74729	4.77631	5.02632	0.303142		4.98616		5.44961	5.21314	5.2163	0.189214		5.32928	5.65379	5.21031	6.03968	5.55827	0.321865
EE 18:1;0	EE	STE	STO	18	1	0			4.64172	3.65634	3.10459	2.99204	3.59867	0.652568		4.01916		3.75673	3.40327	3.72639	0.252348		4.11077	4.12623	3.49722	3.80998	3.88605	0.25747
EE 18:2;0	EE	STE	STO	18	2	0			0.322361	0.301614	NA	NA	0.311988	0.0103733		NA		NA	NA	#DIV/0!	#DIV/0!		NA	0.234442	NA	0.337959	0.2862	0.0517582
EE 20:1;0	EE	STE	STO	20	1	0			NA	NA	NA	NA	#DIV/0!	#DIV/0!		0.447492		NA	NA	0.447492	0		NA	NA	NA	NA	#DIV/0!	#DIV/0!
total lipid in class:									11.4136	9.99708	8.66596	8.53063	9.65182	1.16748		10.3084		10.2886	9.7632	10.1201	0.252483		10.6512	11.1246	9.88555	11.3071	10.7421	0.549414
%mol of class									sfk1-42	sfk1-42	sfk1-42	sfk1-42	AVG	STD		tcb123-42	tcb123-42	tcb123-42	tcb123-42	AVG	STD		wildtype-42	wildtype-42	wildtype-42	wildtype-42	AVG	STD
EE 16:0;0	EE	STE	STO	16	0	0			8.32151	9.57436	9.39405	8.93587	9.05645	0.483962		8.29995		10.5193	11.7459	10.1884	1.42615		11.3709	9.97893	11.9166	9.90038	10.7917	0.874051
EE 16:1;0	EE	STE	STO	16	1	0			48.1858	50.8345	54.7808	55.9901	52.4478	3.11279		48.3699		52.9673	53.3959	51.5777	2.27499		50.0346	50.8225	52.7064	53.4151	51.7447	1.36837
EE 18:1;0	EE	STE	STO	18	1	0			40.6683	36.5741	35.8251	35.0741	37.0354	2.16347		38.9891		36.5134	34.8582	36.7869	1.69751		38.5944	37.0911	35.3771	33.6956	36.1896	1.8355
EE 18:2;0	EE	STE	STO	18	2	0			2.82436	3.01702			2.92069	0.0963315						#DIV/0!	#DIV/0!			2.10743		2.98892	2.54817	0.440745
EE 20:1;0	EE	STE	STO	20	1	0							#DIV/0!	#DIV/0!		4.34104				4.34104	0						#DIV/0!	#DIV/0!
								Total	100	100	100	100				100		100	100				100	100	100	100

## Sheet: DAG
%mol of total lipids
feature		class	structuralcategory	functionalcategory	totallength	totaldb	totaloh		sfk1-42	sfk1-42	sfk1-42	sfk1-42	AVG	STD		tcb123-42	tcb123-42	tcb123-42	tcb123-42	AVG	STD		wildtype-42	wildtype-42	wildtype-42	wildtype-42	AVG	STD
DAG 30:1;0	DAG	GL	MEM	30	1	0			0.079101	0.0880369	0.110519	NA	0.0925524	0.0132179		NA	NA	NA	NA	#DIV/0!	#DIV/0!		NA	0.0971434	0.109934	0.118518	0.108532	0.00878217
DAG 32:0;0	DAG	GL	MEM	32	0	0			0.115392	0.131282	0.215836	0.324817	0.196832	0.0831724		NA	0.266459	NA	NA	0.266459	0		NA	NA	0.139357	0.156137	0.147747	0.00838985
DAG 32:1;0	DAG	GL	MEM	32	1	0			0.561322	0.561796	0.573511	NA	0.565543	0.00563777		0.637806	0.531716	0.565598	NA	0.578373	0.0442434		0.701068	0.721009	0.835489	0.789265	0.761708	0.0537043
DAG 32:2;0	DAG	GL	MEM	32	2	0			0.662036	0.621448	0.568707	0.577377	0.607392	0.0373528		0.529487	0.494054	0.587177	NA	0.536906	0.0383774		0.680966	0.674797	0.65953	0.713984	0.682319	0.0198774
DAG 34:0;0	DAG	GL	MEM	34	0	0			0.964379	1.22899	0.973045	2.15725	1.33092	0.488785		1.29148	1.0738	1.48547	1.3963	1.31176	0.153588		1.70256	1.37218	1.35623	1.56426	1.49881	0.143319
DAG 34:1;0	DAG	GL	MEM	34	1	0			1.42046	1.28985	1.14391	1.10916	1.24084	0.123895		1.38979	1.01324	1.15758	1.16934	1.18249	0.134548		1.42144	1.33289	1.49622	1.28889	1.38486	0.0800762
DAG 34:2;0	DAG	GL	MEM	34	2	0			1.359	1.18696	1.01982	1.09188	1.16442	0.127022		1.08382	1.01758	1.10724	1.04886	1.06437	0.0340816		1.2383	1.40714	1.10741	1.17232	1.23129	0.111577
DAG 36:0;0	DAG	GL	MEM	36	0	0			3.38842	4.52648	3.61641	8.10272	4.90851	1.89269		5.0363	4.14156	5.2374	5.47677	4.97301	0.504723		6.32123	4.90194	5.19365	5.61748	5.50858	0.533726
DAG 36:1;0	DAG	GL	MEM	36	1	0			0.794389	1.13432	1.36416	0.96223	1.06377	0.211001		2.11873	0.701557	0.991041	1.3221	1.28336	0.529927		0.909837	0.829775	0.987416	0.704917	0.857986	0.104483
DAG 36:2;0	DAG	GL	MEM	36	2	0			0.325985	0.339547	0.382071	0.259397	0.32675	0.0440487		0.392799	0.256343	0.255314	0.254903	0.28984	0.059446		0.26586	0.282879	0.247305	0.223805	0.254962	0.0219515
DAG 38:0;0	DAG	GL	MEM	38	0	0			NA	0.0728196	NA	NA	0.0728196	0		0.212886	NA	NA	NA	0.212886	0		0.125457	0.0798276	0.0874239	0.0841999	0.0942271	0.0182311
total lipid in class:									9.67048	11.1815	9.96799	14.5848	11.3512	1.95085		12.6931	9.49632	11.3868	10.6683	11.0611	1.15892		13.3667	11.6996	12.22	12.4338	12.43	0.603133
%mol of class									sfk1-42	sfk1-42	sfk1-42	sfk1-42	AVG	STD		tcb123-42	tcb123-42	tcb123-42	tcb123-42	AVG	STD		wildtype-42	wildtype-42	wildtype-42	wildtype-42	AVG	STD
DAG 30:1;0	DAG	GL	MEM	30	1	0			0.817963	0.787342	1.10874		0.904682	0.144833						#DIV/0!	#DIV/0!			0.830316	0.899623	0.953192	0.894377	0.0503008
DAG 32:0;0	DAG	GL	MEM	32	0	0			1.19324	1.1741	2.16529	2.22709	1.68993	0.506778			2.80592			2.80592	0				1.14041	1.25575	1.19808	0.0576705
DAG 32:1;0	DAG	GL	MEM	32	1	0			5.80448	5.02432	5.75353		5.52744	0.35637		5.02483	5.59918	4.96713		5.19704	0.285327		5.24488	6.16269	6.83708	6.34775	6.1481	0.576752
DAG 32:2;0	DAG	GL	MEM	32	2	0			6.84594	5.5578	5.70533	3.95875	5.51696	1.02851		4.17146	5.20259	5.15663		4.84356	0.475618		5.09449	5.7677	5.39715	5.74229	5.50041	0.276307
DAG 34:0;0	DAG	GL	MEM	34	0	0			9.9724	10.9913	9.76169	14.7911	11.3791	2.02403		10.1747	11.3076	13.0455	13.0883	11.904	1.23004		12.7373	11.7284	11.0985	12.5808	12.0362	0.66371
DAG 34:1;0	DAG	GL	MEM	34	1	0			14.6886	11.5355	11.4758	7.60491	11.3262	2.51098		10.9492	10.6699	10.166	10.9609	10.6865	0.322308		10.6342	11.3926	12.244	10.366	11.1592	0.730771
DAG 34:2;0	DAG	GL	MEM	34	2	0			14.053	10.6154	10.231	7.48638	10.5965	2.33208		8.53865	10.7155	9.72389	9.83155	9.70241	0.774257		9.26404	12.0273	9.06227	9.42852	9.94553	1.20888
DAG 36:0;0	DAG	GL	MEM	36	0	0			35.0388	40.4818	36.2803	55.5558	41.8392	8.17212		39.6774	43.6123	45.9953	51.337	45.1555	4.22218		47.2909	41.8984	42.5014	45.1792	44.2175	2.16179
DAG 36:1;0	DAG	GL	MEM	36	1	0			8.21457	10.1446	13.6854	6.59747	9.6605	2.64134		16.692	7.38768	8.7034	12.3928	11.294	3.6165		6.80674	7.09235	8.08035	5.66937	6.9122	0.859182
DAG 36:2;0	DAG	GL	MEM	36	2	0			3.37093	3.03668	3.83297	1.77854	3.00478	0.762341		3.09459	2.69939	2.24218	2.38936	2.60638	0.326624		1.98897	2.41785	2.02378	1.79998	2.05765	0.224725
DAG 38:0;0	DAG	GL	MEM	38	0	0				0.651248			0.651248	0		1.67718				1.67718	0		0.938579	0.682312	0.715419	0.677187	0.753374	0.10793
								Total	100	100	100	100				100	100	100	100				100	100	100	100

## Sheet: PA
%mol of total lipids
feature		class	structuralcategory	functionalcategory	totallength	totaldb	totaloh		sfk1-42	sfk1-42	sfk1-42	sfk1-42	AVG	STD		tcb123-42	tcb123-42	tcb123-42	tcb123-42	AVG	STD		wildtype-42	wildtype-42	wildtype-42	wildtype-42	AVG	STD
PA 32:1;0	PA	GPL	MEM	32	1	0			0.110033	0.130208	0.125491	0.210702	0.144109	0.0391651		0.279493	0.258451	0.327449	0.357961	0.305839	0.0391259		0.143916	0.120688	0.163913	0.15846	0.146744	0.0167253
PA 32:2;0	PA	GPL	MEM	32	2	0			0.220158	0.224721	0.210764	0.315336	0.242745	0.0422114		0.20019	0.180587	0.21166	0.250829	0.210817	0.0256343		0.0939107	0.0855644	0.0818262	0.0865525	0.0869634	0.00438128
PA 34:1;0	PA	GPL	MEM	34	1	0			0.213542	0.210342	0.198318	0.291317	0.22838	0.0367774		0.747244	0.62148	0.717262	0.786186	0.718043	0.0608714		0.257897	0.205784	0.256153	0.22623	0.236516	0.0217541
PA 34:2;0	PA	GPL	MEM	34	2	0			0.35054	0.305056	0.279545	0.449046	0.346047	0.0646754		0.780948	0.671856	0.744127	0.837634	0.758641	0.060166		0.169284	0.153379	0.137966	0.132513	0.148286	0.0143364
total lipid in class:									0.894272	0.870328	0.814119	1.2664	0.96128	0.178548		2.00788	1.73237	2.0005	2.23261	1.99334	0.177212		0.665007	0.565416	0.639857	0.603755	0.618509	0.0375979
%mol of class
PA 32:1;0	PA	GPL	MEM	32	1	0			sfk1-42	sfk1-42	sfk1-42	sfk1-42	AVG	STD		tcb123-42	tcb123-42	tcb123-42	tcb123-42	AVG	STD		wildtype-42	wildtype-42	wildtype-42	wildtype-42	AVG	STD
PA 32:2;0	PA	GPL	MEM	32	2	0			12.3042	14.9608	15.4144	16.6379	14.8293	1.58166		13.9199	14.9189	16.3684	16.0333	15.3101	0.965498		21.6413	21.3449	25.6171	26.2457	23.7122	2.23269
PA 34:1;0	PA	GPL	MEM	34	1	0			24.6186	25.8203	25.8886	24.9002	25.3069	0.557023		9.97025	10.4242	10.5804	11.2348	10.5524	0.453258		14.1218	15.133	12.7882	14.3357	14.0947	0.843182
PA 34:2;0	PA	GPL	MEM	34	2	0			23.8788	24.1682	24.3599	23.0035	23.8526	0.519249		37.2157	35.8745	35.8542	35.2138	36.0395	0.72917		38.781	36.3952	40.0328	37.4705	38.1699	1.3677
									39.1983	35.0508	34.3372	35.4584	36.0112	1.88336		38.8942	38.7824	37.1971	37.5181	38.098	0.75005		25.4559	27.1268	21.562	21.9482	24.0232	2.34779
								Total	100	100	100	100				100	100	100	100				100	100	100	100

## Sheet: TAG
%mol of total lipids
feature		class	structuralcategory	functionalcategory	totallength	totaldb	totaloh		sfk1-42	sfk1-42	sfk1-42	sfk1-42	AVG	STD		tcb123-42	tcb123-42	tcb123-42	tcb123-42	AVG	STD		wildtype-42	wildtype-42	wildtype-42	wildtype-42	AVG	STD
TAG 36:0;0	TAG	GL	STO	36	0	0			NA	0.138559	NA		0.138559	0		0.10747		0.129985	NA	0.118727	0.0112578		0.104032	0.0808358	0.0905108	0.0977806	0.0932899	0.00863703
TAG 40:0;0	TAG	GL	STO	40	0	0			0.112101	0.0588452	1.16024		0.44373	0.507118		0.0581304		NA	NA	0.0581304	0		NA	NA	NA	NA	#DIV/0!	#DIV/0!
TAG 40:1;0	TAG	GL	STO	40	1	0			0.0624836	0.102771	0.66069		0.275315	0.272997		0.107049	1.04985	0.0966105	0.0742531	0.331941	0.414656		0.088009	0.0837414	0.115608	0.122266	0.102406	0.0167657
TAG 40:2;0	TAG	GL	STO	40	2	0			NA	0.0359083	0.172571		0.10424	0.0683312		NA	0.330073	NA	NA	0.330073	0		NA	NA	NA	0.0412502	0.0412502	0
TAG 42:1;0	TAG	GL	STO	42	1	0			0.290429	0.422141	0.732503		0.481691	0.185323		0.452966	0.893144	0.42408	0.412493	0.545671	0.201155		0.39542	0.342235	0.511928	0.584297	0.45847	0.0951
TAG 42:2;0	TAG	GL	STO	42	2	0			0.233814	0.351759	0.376026		0.320533	0.062115		NA	0.419731	0.351037	0.321403	0.364057	0.0411846		0.272335	0.261464	0.353505	0.446982	0.333572	0.0745129
TAG 44:1;0	TAG	GL	STO	44	1	0			0.41201	0.529603	0.838818		0.593477	0.180002		NA	NA	NA	NA	#DIV/0!	#DIV/0!		NA	NA	0.632992	0.701022	0.667007	0.0340148
TAG 44:2;0	TAG	GL	STO	44	2	0			NA	0.55813	0.586532		0.572331	0.0142009		0.563002	0.607361	0.591922	NA	0.587428	0.0183863		0.470602	0.512213	0.585743	0.678003	0.56164	0.078823
TAG 46:1;0	TAG	GL	STO	46	1	0			0.294807	0.434227	0.687746		0.47226	0.162655		0.478003	0.811099	0.399959	0.369801	0.514715	0.175614		0.371182	0.363621	0.439288	0.457389	0.40787	0.0410587
TAG 46:2;0	TAG	GL	STO	46	2	0			0.529604	0.642089	0.65611		0.609268	0.0566208		0.615946	0.65349	0.650315	0.618568	0.63458	0.0173838		0.561241	0.648715	0.64274	0.7332	0.646474	0.0608381
TAG 46:3;0	TAG	GL	STO	46	3	0			0.10046	0.136885	0.142087		0.126478	0.0185193		0.125819	0.13917	0.140547	0.104572	0.127527	0.0144474		0.103704	0.10081	0.10981	0.143093	0.114354	0.0169074
TAG 47:1;0	TAG	GL	STO	47	1	0			NA	0.100226	0.171575		0.135901	0.0356745		0.198053	0.160037	0.0604459	NA	0.139512	0.0580225		NA	0.0354714	0.0472726	NA	0.041372	0.00590063
TAG 47:2;0	TAG	GL	STO	47	2	0			0.0484005	0.0881729	0.105607		0.0807269	0.0239407		0.1211	0.0902632	0.0979515	NA	0.103105	0.0131059		0.0434753	0.0663098	0.048417	0.0498383	0.0520101	0.00858706
TAG 48:1;0	TAG	GL	STO	48	1	0			NA	0.489729	0.812425		0.651077	0.161348		0.643891	0.997663	NA	NA	0.820777	0.176886		NA	NA	0.499907	0.53706	0.518484	0.0185767
TAG 48:2;0	TAG	GL	STO	48	2	0			1.71605	2.01495	1.86739		1.86613	0.122031		1.84958	1.73353	1.98298	NA	1.85536	0.101922		1.72541	1.88452	1.83973	2.19596	1.9114	0.17423
TAG 48:3;0	TAG	GL	STO	48	3	0			2.22839	2.51498	2.22148		2.32162	0.136761		2.34824	2.15607	2.41773	2.16468	2.27168	0.114024		1.7276	1.87381	1.6615	2.14939	1.85307	0.187535
TAG 49:1;0	TAG	GL	STO	49	1	0			NA	0.0780329	0.166141		0.122087	0.0440539		0.181535	0.158826	0.0671192	0.0889549	0.124109	0.047399		NA	0.0454557	NA	NA	0.0454557	0
TAG 49:2;0	TAG	GL	STO	49	2	0			0.100465	0.155876	0.139181		0.131841	0.0232093		0.200215	0.135037	0.128603	0.130472	0.148582	0.0299022		0.0934255	0.116564	0.0972228	0.0907504	0.0994907	0.010122
TAG 49:3;0	TAG	GL	STO	49	3	0			0.115832	0.124257	0.10226		0.114116	0.00906208		0.107999	0.108087	0.0780056	NA	0.0980305	0.0141598		0.0969739	0.0897085	NA	0.0782388	0.088307	0.00771248
TAG 50:1;0	TAG	GL	STO	50	1	0			NA	0.449106	0.815799		0.632453	0.183347		NA	1.08995	NA	NA	1.08995	0		NA	NA	0.442694	0.466944	0.454819	0.0121248
TAG 50:2;0	TAG	GL	STO	50	2	0			3.01335	3.20657	2.76027		2.9934	0.182744		3.06258	2.81563	3.32184	3.0811	3.07029	0.179101		2.89626	2.9656	2.66563	3.13362	2.91528	0.167995
TAG 50:3;0	TAG	GL	STO	50	3	0			6.33459	6.32725	5.25497		5.97227	0.507218		5.80386	5.31899	6.20945	5.69929	5.7579	0.317052		4.75039	5.0516	4.11999	5.111	4.75824	0.393042
TAG 50:4;0	TAG	GL	STO	50	4	0			0.0896668	0.0834896	0.0837485		0.085635	0.00285287		0.0976799	0.074802	0.0790659	0.076353	0.0819752	0.00919464		0.0660713	0.0812897	0.0563957	0.0665169	0.0675684	0.00889454
TAG 51:1;0	TAG	GL	STO	51	1	0			NA	0.0376185	0.0921397		0.0648791	0.0272606		0.100455	0.114539	NA	NA	0.107497	0.00704195		NA	NA	NA	NA	#DIV/0!	#DIV/0!
TAG 51:2;0	TAG	GL	STO	51	2	0			0.0716417	0.0820019	0.103794		0.0858126	0.0133999		0.116127	0.100704	0.0657264	0.073473	0.0890077	0.0203447		0.0673809	0.0781251	0.0418586	0.0527987	0.0600408	0.0138199
TAG 51:3;0	TAG	GL	STO	51	3	0			0.111617	0.103036	0.0844167		0.0996898	0.0113537		0.090482	0.061819	0.0632197	NA	0.0718402	0.0131941		0.0628907	0.10268	0.0394406	0.0593084	0.0660799	0.0229413
TAG 52:1;0	TAG	GL	STO	52	1	0			0.276724	0.292245	0.425328		0.331432	0.0666961		NA	0.548964	0.300905	NA	0.424935	0.124029		NA	NA	NA	NA	#DIV/0!	#DIV/0!
TAG 52:2;0	TAG	GL	STO	52	2	0			2.10412	1.96886	1.72997		1.93432	0.154691		2.05449	2.05394	1.94524	1.90872	1.9906	0.0649174		1.7768	1.89473	1.42854	1.73902	1.70977	0.17223
TAG 52:3;0	TAG	GL	STO	52	3	0			4.55399	4.02009	3.13986		3.90465	0.583059		3.60754	3.19518	3.58381	3.48392	3.46761	0.163986		3.14309	3.49982	2.5238	2.95372	3.03011	0.351987
TAG 52:4;0	TAG	GL	STO	52	4	0			0.0919455	0.0855694	0.0700661		0.082527	0.00918766		0.08984	0.103183	0.0802454	NA	0.0910896	0.00940598		0.0554749	0.0878848	0.0568137	0.0682528	0.0671065	0.0129835
TAG 54:0;0	TAG	GL	STO	54	0	0			0.0613365	0.0994344	0.107312		0.0893609	0.0200755		0.090023	0.0987233	0.085942	0.13188	0.101642	0.0180579		0.0967156	0.0856487	0.0847018	0.0794908	0.0866392	0.00627233
TAG 54:1;0	TAG	GL	STO	54	1	0			0.132771	0.151895	0.201929		0.162198	0.0291583		0.577927	0.16724	0.153799	0.189861	0.272207	0.176977		0.148209	0.143472	0.139455	0.1333	0.141109	0.00547029
TAG 54:2;0	TAG	GL	STO	54	2	0			0.801855	0.616407	0.560701		0.659654	0.103091		0.751373	0.601278	0.566234	0.543735	0.615655	0.0809954		0.543243	0.556269	0.452681	0.488808	0.51025	0.041774
TAG 54:3;0	TAG	GL	STO	54	3	0			0.757917	0.58119	0.481699		0.606936	0.114226		0.674482	0.538699	0.50346	0.527815	0.561114	0.0666852		0.471533	0.578191	0.362784	0.414853	0.45684	0.0799239
TAG 56:1;0	TAG	GL	STO	56	1	0			0.288201	0.295117	0.328966		0.304094	0.0178119		0.667915	NA	0.356294	0.560949	0.528386	0.129286		0.362633	0.330854	0.273115	0.298191	0.316198	0.0337318
TAG 56:2;0	TAG	GL	STO	56	2	0			0.190076	0.191948	0.187231		0.189752	0.00193927		0.363851	NA	0.140472	0.155649	0.219991	0.101913		0.131475	0.14212	0.120062	0.129375	0.130758	0.00784097
TAG 56:3;0	TAG	GL	STO	56	3	0			0.0824146	0.0917138	0.10068		0.0916029	0.00745731		0.197999	NA	0.0715467	0.0918612	0.120469	0.0554459		0.0562136	0.0746023	0.0691556	0.0486666	0.0621595	0.0102613
TAG 58:1;0	TAG	GL	STO	58	1	0			0.297645	0.282906	0.263276		0.281276	0.0140784		NA	0.27185	0.32079	NA	0.29632	0.0244703		0.433868	0.366173	NA	0.352074	0.384038	0.0357018
TAG 58:2;0	TAG	GL	STO	58	2	0			0.275168	0.251044	0.244349		0.256854	0.0132358		0.351504	0.176559	0.196662	0.206426	0.232788	0.0693817		0.169557	0.197533	0.194294	0.183219	0.18615	0.0109524
TAG 60:1;0	TAG	GL	STO	60	1	0			NA	NA	0.0760724		0.0760724	0		0.06737	NA	NA	NA	0.06737	0		0.0960457	0.0924741	NA	NA	0.0942599	0.0017858
TAG 60:2;0	TAG	GL	STO	60	2	0			0.405142	0.317776	0.287332		0.33675	0.0499321		0.378924	0.346859	0.298532	0.328302	0.338154	0.0291758		0.278073	0.339729	0.223478	0.26828	0.27739	0.041461
total lipid in class:									26.185	28.5124	28.9993		27.8989	1.2281		27.3034	28.1223	25.9605	21.3445	25.6827	2.62086		21.6593	23.1743	20.9711	25.154	22.7397	1.60568
%mol of class
TAG 36:0;0	TAG	GL	STO	36	0	0			sfk1-42	sfk1-42	sfk1-42	sfk1-42	AVG	STD		tcb123-42	tcb123-42	tcb123-42	tcb123-42	AVG	STD		wildtype-42	wildtype-42	wildtype-42	wildtype-42	AVG	STD
TAG 40:0;0	TAG	GL	STO	40	0	0				0.48596			0.48596	0		0.393612		0.500703		0.447157	0.0535454		0.480312	0.348817	0.431599	0.388729	0.412364	0.0489481
TAG 40:1;0	TAG	GL	STO	40	1	0			0.428109	0.206385	4.00094		1.54514	1.73887		0.212905				0.212905	0						#DIV/0!	#DIV/0!
TAG 40:2;0	TAG	GL	STO	40	2	0			0.238623	0.360443	2.2783		0.959121	0.934123		0.392071	3.73316	0.372144	0.347879	1.21131	1.45607		0.406333	0.361355	0.551272	0.486072	0.451258	0.0729993
TAG 42:1;0	TAG	GL	STO	42	1	0				0.125939	0.595086		0.360512	0.234573			1.1737			1.1737	0					0.163991	0.163991	0
TAG 42:2;0	TAG	GL	STO	42	2	0			1.10914	1.48055	2.52593		1.70521	0.599822		1.65901	3.17592	1.63356	1.93255	2.10026	0.632		1.82563	1.47679	2.44112	2.32288	2.01661	0.387907
TAG 44:1;0	TAG	GL	STO	44	1	0			0.892929	1.23371	1.29667		1.1411	0.177358			1.49252	1.35219	1.50579	1.45017	0.069488		1.25736	1.12825	1.68568	1.77699	1.46207	0.275006
TAG 44:2;0	TAG	GL	STO	44	2	0			1.57346	1.85745	2.89254		2.10782	0.56687						#DIV/0!	#DIV/0!				3.01841	2.78692	2.90267	0.115742
TAG 46:1;0	TAG	GL	STO	46	1	0				1.9575	2.02257		1.99004	0.0325374		2.06202	2.15971	2.28009		2.16727	0.0891858		2.17275	2.21026	2.7931	2.69541	2.46788	0.278842
TAG 46:2;0	TAG	GL	STO	46	2	0			1.12586	1.52294	2.37159		1.67347	0.519586		1.75071	2.88418	1.54064	1.73253	1.97702	0.530179		1.71373	1.56907	2.09474	1.81836	1.79897	0.192337
TAG 46:3;0	TAG	GL	STO	46	3	0			2.02255	2.25196	2.2625		2.179	0.110716		2.25593	2.32374	2.50502	2.89802	2.49568	0.249503		2.59122	2.79929	3.06489	2.91485	2.84256	0.17299
TAG 47:1;0	TAG	GL	STO	47	1	0			0.383654	0.48009	0.489968		0.451237	0.0479582		0.460818	0.494873	0.541388	0.489926	0.496751	0.0288692		0.478794	0.43501	0.523628	0.56887	0.501575	0.0499116
TAG 47:2;0	TAG	GL	STO	47	2	0				0.351518	0.591653		0.471585	0.120068		0.725379	0.569075	0.232838		0.509097	0.205503			0.153064	0.225419		0.189241	0.0361774
TAG 48:1;0	TAG	GL	STO	48	1	0			0.184841	0.309244	0.364172		0.286085	0.0750207		0.443534	0.320966	0.377309		0.380603	0.0500923		0.200723	0.286135	0.230875	0.198133	0.228967	0.0354271
TAG 48:2;0	TAG	GL	STO	48	2	0				1.7176	2.80153		2.25957	0.541966		2.35828	3.54758			2.95293	0.594651				2.38379	2.13509	2.25944	0.124351
TAG 48:3;0	TAG	GL	STO	48	3	0			6.55354	7.06693	6.43944		6.68664	0.272913		6.77418	6.16423	7.63845		6.85895	0.604825		7.96612	8.13193	8.77272	8.73006	8.40021	0.35636
TAG 49:1;0	TAG	GL	STO	49	1	0			8.51015	8.82066	7.66046		8.33042	0.490405		8.60053	7.66676	9.31309	10.1416	8.9305	0.910917		7.97624	8.08574	7.9228	8.54493	8.13243	0.245294
TAG 49:2;0	TAG	GL	STO	49	2	0				0.27368	0.572912		0.423296	0.149616		0.66488	0.564768	0.258543	0.416758	0.476237	0.153584			0.196147			0.196147	0
TAG 49:3;0	TAG	GL	STO	49	3	0			0.383675	0.546696	0.479947		0.470106	0.0669162		0.733295	0.480177	0.495379	0.611266	0.580029	0.101983		0.431341	0.502989	0.463605	0.36078	0.439679	0.0521422
TAG 50:1;0	TAG	GL	STO	50	1	0			0.44236	0.435801	0.352628		0.410263	0.0408418		0.395552	0.384344	0.300478		0.360125	0.0424244		0.447723	0.387104		0.31104	0.381956	0.0559194
TAG 50:2;0	TAG	GL	STO	50	2	0				1.57512	2.81317		2.19415	0.619023			3.87575			3.87575	0				2.11098	1.85634	1.98366	0.127317
TAG 50:3;0	TAG	GL	STO	50	3	0			11.5079	11.2462	9.51842		10.7575	0.882666		11.2168	10.0121	12.7958	14.4351	12.1149	1.66397		13.3719	12.797	12.711	12.4578	12.8344	0.334424
TAG 50:4;0	TAG	GL	STO	50	4	0			24.1917	22.1912	18.121		21.5013	2.52589		21.2569	18.9137	23.9188	26.7014	22.6977	2.91184		21.9323	21.7983	19.6461	20.3189	20.9239	0.972158
TAG 51:1;0	TAG	GL	STO	51	1	0			0.342435	0.292819	0.288795		0.308016	0.0243934		0.357757	0.265988	0.304562	0.357717	0.321506	0.0387128		0.305048	0.350776	0.268922	0.264439	0.297296	0.0346586
TAG 51:2;0	TAG	GL	STO	51	2	0				0.131937	0.317731		0.224834	0.0928967		0.36792	0.407287			0.387603	0.0196836						#DIV/0!	#DIV/0!
TAG 51:3;0	TAG	GL	STO	51	3	0			0.273598	0.287601	0.35792		0.306373	0.0368947		0.425321	0.358094	0.253178	0.344224	0.345204	0.0613486		0.311094	0.33712	0.199602	0.209902	0.264429	0.0604925
TAG 52:1;0	TAG	GL	STO	52	1	0			0.426262	0.361371	0.291099		0.359578	0.0551947		0.331394	0.219822	0.243522		0.264913	0.0479949		0.290363	0.443076	0.188072	0.235782	0.289323	0.0958641
TAG 52:2;0	TAG	GL	STO	52	2	0			1.0568	1.02497	1.46668		1.18282	0.201142			1.95206	1.15909		1.55557	0.396485						#DIV/0!	#DIV/0!
TAG 52:3;0	TAG	GL	STO	52	3	0			8.0356	6.90529	5.96554		6.96881	0.846292		7.52467	7.30359	7.49305	8.94242	7.81593	0.655849		8.20341	8.17602	6.81194	6.91351	7.52622	0.664534
TAG 52:4;0	TAG	GL	STO	52	4	0			17.3916	14.0994	10.8274		14.1061	2.67984		13.2128	11.3617	13.8048	16.3223	13.6754	1.77412		14.5115	15.1022	12.0347	11.7426	13.3477	1.47759
TAG 54:0;0	TAG	GL	STO	54	0	0			0.351138	0.300113	0.241613		0.297621	0.0447481		0.329043	0.366909	0.309106		0.335019	0.0239735		0.256125	0.379234	0.270915	0.27134	0.294404	0.0493589
TAG 54:1;0	TAG	GL	STO	54	1	0			0.234243	0.348741	0.37005		0.317678	0.0596355		0.329713	0.351049	0.331049	0.617864	0.407419	0.121794		0.446531	0.369586	0.403898	0.316017	0.384008	0.04779
TAG 54:2;0	TAG	GL	STO	54	2	0			0.50705	0.532732	0.696323		0.578702	0.083829		2.11668	0.594686	0.592436	0.889505	1.04833	0.628537		0.684271	0.6191	0.664987	0.529938	0.624574	0.0595458
TAG 54:3;0	TAG	GL	STO	54	3	0			3.06227	2.16189	1.9335		2.38588	0.487278		2.75194	2.13808	2.18113	2.54742	2.40464	0.255935		2.50812	2.40037	2.1586	1.94326	2.25259	0.218892
TAG 56:1;0	TAG	GL	STO	56	1	0			2.89447	2.03838	1.66107		2.19797	0.516024		2.47032	1.91556	1.93933	2.47284	2.19951	0.2722		2.17704	2.49497	1.72993	1.64926	2.0128	0.343382
TAG 56:2;0	TAG	GL	STO	56	2	0			1.10063	1.03505	1.13439		1.09002	0.0412457		2.44627		1.37245	2.62807	2.14893	0.55405		1.67426	1.42768	1.30234	1.18546	1.39743	0.181328
TAG 56:3;0	TAG	GL	STO	56	3	0			0.725896	0.673209	0.645641		0.681582	0.0332947		1.33262		0.541099	0.729224	0.867648	0.337637		0.607012	0.613267	0.572514	0.514331	0.576781	0.0392536
TAG 58:1;0	TAG	GL	STO	58	1	0			0.31474	0.321663	0.347182		0.327861	0.0139508		0.725181		0.275598	0.430374	0.477051	0.186486		0.259535	0.321919	0.329767	0.193475	0.276174	0.0549562
TAG 58:2;0	TAG	GL	STO	58	2	0			1.1367	0.992221	0.907871		1.01226	0.0944882			0.966668	1.23569		1.10118	0.134508		2.00315	1.58008		1.39968	1.66097	0.252916
TAG 60:1;0	TAG	GL	STO	60	1	0			1.05086	0.880471	0.842602		0.924645	0.0905777		1.2874	0.627825	0.757543	0.967114	0.90997	0.249278		0.782835	0.852381	0.926484	0.728389	0.822522	0.0743907
TAG 60:2;0	TAG	GL	STO	60	2	0					0.262325		0.262325	0		0.246745				0.246745	0		0.443438	0.399038			0.421238	0.0222
									1.54723	1.11452	0.990823		1.21752	0.238543		1.38783	1.23339	1.14995	1.53811	1.32732	0.14864		1.28385	1.46597	1.06565	1.06655	1.22051	0.167294
								Total	100	100	100					100	100	100	100				100	100	100	100
