# Supplementary material for: Tricalbin proteins regulate plasma membrane phospholipid homeostasis
Source: Life Sci Alliance. 2022 Apr 19;5(8):e202201430. doi: 10.26508/lsa.202201430 (PMC9018018; doi:10.26508/lsa.202201430)
Supplement: Supplementary file 12 [file LSA-2022-01430_TableS4.xlsx]

## Sheet: Sheet1
Supplemental table 4: Cellular PI, PI4P and PI(4,5)P2 levels in Wild type and tcb1/2/3Δ Cells at 26oC and following 10min incubation at 42oC as measured by 3H-inositol labelling, Related to Figure S5.
Counts per minute (cpm)
	WT_26_1	WT_26_2	WT_26_3	AVG	STDEV		tcb123_26_1	tcb123_26_2	tcb123_26_3	AVG	STDEV		WT_42_1	WT_42_2	WT_42_3	AVG	STDEV		tcb123_42_1	tcb123_42_2	tcb123_42_3	AVG	STDEV
free inositol	18515.6	15921	18223.6	17553.4	1004.95		27141.8	46430.8	3509.19	25693.9	15200.9		17879	31171	11888.8	20312.9	6978.32		35638	37029	42787.9	38485	2680.5
PI	774608	756582	871610	800934	43747.3		1.11584e+06	1.63117e+06	1.29652e+06	1.34784e+06	184887		871692	1160573	667519	899928	175176		1.3269e+06	1.42502e+06	1.79945e+06	1.51712e+06	176333
PI3P	14188.2	12293	13708.4	13396.5	696.739		13301.2	35712.8	26683.8	25232.6	7973.38		16378.4	26228	12741.2	18449.2	4934.05		18450	34132.6	47451.2	33344.6	10264.8
PI4P	13194.8	11621	13680.2	12832	761.181		21704	33099.8	24623.6	26475.8	4185.63		17774	21978	13052.4	17601.5	3157.44		32535.6	28572.6	42433.6	34513.9	5048.13
PI45P2	10418.2	9608	11160.4	10395.5	549.032		22704	26825.6	20091.6	23207.1	2400.68		19971.6	27667	17224.2	21620.9	3827.74		29105.2	34510.4	25082	29565.9	3345.36
% total phosphoinositides
	WT_26_1	WT_26_2	WT_26_3	AVG	STDEV		tcb123_26_1	tcb123_26_2	tcb123_26_3	AVG	STDEV		WT_42_1	WT_42_2	WT_42_3	AVG	STDEV		tcb123_42_1	tcb123_42_2	tcb123_42_3	AVG	STDEV
free inositol	2.22831	1.97525	1.96294	2.0555	0.105914		2.26051	2.61841	0.255878	1.7116	0.90038		1.89457	2.45902	1.64568	1.99976	0.294686		2.47035	2.37477	2.18618	2.34377	0.102248
PI	93.2224	93.8658	93.8848	93.6577	0.266632		92.9332	91.9882	94.538	93.1531	0.911489		92.3701	91.5555	92.3997	92.1084	0.338761		91.9779	91.3905	91.9398	91.7694	0.23241
PI3P	1.70752	1.52514	1.47659	1.56975	0.0860948		1.10779	2.01399	1.94569	1.68916	0.356829		1.73556	2.06908	1.76367	1.8561	0.130799		1.27892	2.18902	2.42444	1.96413	0.42778
PI4P	1.58796	1.44177	1.47355	1.50109	0.0543711		1.80762	1.86663	1.79547	1.82324	0.0269154		1.88345	1.7338	1.80675	1.808	0.0529124		2.2553	1.83244	2.16808	2.08527	0.157869
PI45P2	1.25381	1.19202	1.20213	1.21599	0.0234339		1.89091	1.5128	1.46501	1.62291	0.164984		2.11632	2.1826	2.38422	2.22771	0.0986635		2.01751	2.21325	1.28152	1.83743	0.347383
