# Supplementary material for: Tricalbin proteins regulate plasma membrane phospholipid homeostasis
Source: Life Sci Alliance. 2022 Apr 19;5(8):e202201430. doi: 10.26508/lsa.202201430 (PMC9018018; doi:10.26508/lsa.202201430)
Supplement: Supplementary file 13 [file LSA-2022-01430_SdataF6.xlsx]

## Sheet: Fig 6C and D
Figure 6C and D: Relative PM Pkc1-GFP fluorescencein mother/ daughter cell before/after heat shock in Wild type and tcb1/2/3D cells
	Strain	Wild type, 26C																								Wild type, 10min 42C
	Exp.	1						2						3						4						1						2						3						4
		Aver. Mother PM	Aver. Daughter PM	Cyto	BG	Mother PM/Cyto	Daughter PM/Cyto	Aver. Mother PM	Aver. Daughter PM	Cyto	BG	Mother PM/Cyto	Daughter PM/Cyto	Aver. Mother PM	Aver. Daughter PM	Cyto	BG	Mother PM/Cyto	Daughter PM/Cyto	Aver. Mother PM	Aver. Daughter PM	Cyto	BG	Mother PM/Cyto	Daughter PM/Cyto	Aver. Mother PM	Aver. Daughter PM	Cyto	BG	Mother PM/Cyto	Daughter PM/Cyto	Aver. Mother PM	Aver. Daughter PM	Cyto	BG	Mother PM/Cyto	Daughter PM/Cyto	Aver. Mother PM	Aver. Daughter PM	Cyto	BG	Mother PM/Cyto	Daughter PM/Cyto	Aver. Mother PM	Aver. Daughter PM	Cyto	BG	Mother PM/Cyto	Daughter PM/Cyto
	1	222.041	351.318	352.103	122.417	0.43374	0.996582	311.134	420.566	459.5	125.692	0.555535	0.883364	644.588	571.313	800.706	133.719	0.765935	0.656076	630.465	909.819	937.625	138.059	0.615842	0.965224	1987.97	3937.3	1795.4	129.667	1.11561	2.28586	362.883	384.992	214.3	131.55	2.79556	3.06274	1288.68	2584.85	1026.47	126.412	1.29134	2.73143	1410.59	2982.33	1285.31	124.644	1.10794	2.46211
	2	244.167	243.861	255.95	127.351	0.908374	0.905995	180.311	560.55	259	131.438	0.383131	3.36395	516.392	501.63	779.727	133.056	0.592784	0.569956	791.306	1087.53	1121.79	136.842	0.664468	0.965216	1576.6	3595.18	1442.25	122.636	1.10181	2.63148	426.843	387.497	202.625	136.143	4.37261	3.78078	725.003	1473.6	542.636	129.667	1.4416	3.25431	2123.44	4014.73	1727.8	134.4	1.2483	2.43525
	3	812.717	1373.96	1200.44	459.386	0.476797	1.23415	225.165	629.453	294.5	140.458	0.549895	3.17443	514.201	746.136	692.1	134.227	0.681112	1.09686	1024.33	1500.47	1582.33	138.586	0.613506	0.943298	1021.48	2042.88	814.786	128.174	1.30104	2.78863	222.395	219.246	163.1	138.167	3.37817	3.25188	826.126	778.557	629.529	134.862	1.39743	1.30127	1270.26	3776.57	1056.89	130.041	1.23021	3.93434
	4	571.344	1255.37	1229.93	130.038	0.401226	1.02313	312.773	578.957	416.429	124	0.645534	1.55579	1064.05	1135.15	1356.35	133.089	0.761044	0.819172	939.192	1041.69	1168.21	135.167	0.778304	0.877524	1075.83	1345.79	826.3	125.762	1.3562	1.74156	421.321	470.753	229.727	146.5	3.30207	3.89601	895.476	643.199	823.75	131.615	1.10363	0.739139	708.618	2064.89	767.5	128.118	0.907908	3.02912
	5	914.774	1304.58	1578.35	151.833	0.534828	0.808085	295.451	460.617	442	126.923	0.534879	1.05909	317.338	414.43	415.583	134.973	0.649888	0.995891	855.475	878.062	1061.54	133.75	0.777895	0.80224	1207.61	3133.74	827	268.522	1.68152	5.13041	412.75	459.809	256.316	143	2.38051	2.7958	2062.58	2994.82	953.892	140.8	2.36355	3.51008	329.177	1040.48	372.741	124.297	0.824653	3.68768
	6	429.675	647.019	602.357	124.071	0.638957	1.09338	709.613	711.386	884.444	128	0.768878	0.771222	409.461	452.296	598.833	129.714	0.596324	0.687634	312.662	486.015	416.308	129.316	0.638854	1.24289	558.295	1532.86	433.5	124.964	1.40447	4.56315	377.122	404.596	220.545	139.471	2.93128	3.27016	1280.27	3032.57	820.429	130.421	1.66643	4.20597	455.615	1856.62	394.7	126	1.2267	6.44071
	7	457.708	670.766	667	125.412	0.613559	1.00695	389.932	428.208	464.6	123.357	0.781188	0.893355	248.547	388.53	318.25	131.522	0.626714	1.37638	505.263	959.723	776.154	131.879	0.579541	1.28492	1043.7	2542.07	714.8	131.958	1.5643	4.13511	1107.32	2174.16	880.057	129.657	1.30285	2.72455	1556.64	2321.34	1177.5	139.583	1.36529	2.10205	2295.92	3951.96	1257.53	133.87	1.92411	3.3979
	8	920.366	1111.28	1092.36	131.378	0.821019	1.01968	501.756	575.445	624.562	128.391	0.752493	0.901008	325.914	410.506	560.188	135.4	0.448492	0.647631	847.106	1375.11	982.167	142	0.839245	1.46769	2130.2	3316.15	1101.3	242.083	2.19749	3.57775	777.27	1472.18	582.75	125.821	1.42571	2.94655	1207.98	1384.43	951.667	132.4	1.31286	1.52824	470.454	1413.44	449.857	123.189	1.06305	3.94973
	9	626.853	831.077	838.471	132.171	0.700385	0.989531	893.368	713.166	1442.29	126.269	0.582894	0.445965	506.703	489.876	714	133.118	0.643134	0.614166	1265.31	1577.59	1547.24	127.967	0.801355	1.02139	1099.15	2080.18	978.333	126.333	1.14181	2.29325	1632.23	3773.87	1521.92	198.95	1.08339	2.7022	1294.46	2220.54	995.8	130.778	1.34527	2.41585	737.498	797.244	605.667	130.967	1.27771	1.40357
	10	495.038	374.346	714	128.676	0.625913	0.419716	701.52	1126.57	993.333	132.042	0.661191	1.1547	561.721	710.988	737	153.763	0.699472	0.955401	274.393	319.009	313.9	132.231	0.782533	1.02812	787.513	1945.26	455.083	133	2.03213	5.62668	672.673	1193.61	628.091	129.786	1.08947	2.13488	1735.05	3639.82	1615.33	138	1.08104	2.37036	718.316	1499.76	648.333	127.8	1.13444	2.63569
	11	567.03	616.597	779.5	131.789	0.671968	0.748494	723.573	881.233	989.375	129.438	0.690905	0.874244	567.357	746.437	636.55	189.824	0.845111	1.24598	992.443	1784.24	1799.8	133.233	0.515557	0.990665	608.845	1255	603.5	132.875	1.01136	2.38434	2561.41	3928.93	1834.76	138.553	1.4284	2.23462	1381.45	2483.87	912.2	132.571	1.60189	3.01592	1077.45	2771.72	885.312	140.69	1.25804	3.53337
	12	1086.86	1214.1	1619.52	129.324	0.642557	0.727945	328.836	470.332	632	127.706	0.398835	0.679417	479.434	621.707	653.5	131.125	0.66678	0.939138	710.308	775.951	978.15	132.806	0.683156	0.760809	1148.05	1958.64	936.375	125.381	1.26101	2.26051	1004.75	2418.34	726.062	133.257	1.47012	3.85469	793.962	1525.33	765.389	131.5	1.04508	2.19886	787.827	668.863	578.25	123.062	1.46042	1.19907
	13	1438.44	1433.37	1784.47	128.545	0.791038	0.787972	532.177	636.795	778.875	131.667	0.618827	0.780472	384.17	699.872	609.375	136.65	0.523603	1.19144	537.673	1200.76	797.857	130.023	0.610406	1.6033	797.129	2178.35	728.667	131	1.11455	3.42556	531.978	1074.61	421.812	125.848	1.37223	3.20568	702.087	726.608	438.471	128.356	1.85006	1.92913	649.56	1747.01	509.857	121.786	1.35999	4.18796
	14	1004.3	1055.5	1505.29	139.786	0.633109	0.670607	1345.13	1392.45	1511.81	143.609	0.878172	0.912761	479.643	716.033	595.143	131.571	0.750848	1.26078	250.113	229.272	304.7	139.361	0.669848	0.543798	769.082	1125.5	485	123.577	1.78601	2.77215	1244.03	3119.25	842.222	137	1.56976	4.22881	896.178	927.082	702.7	126.45	1.33575	1.38938	448.026	1164.87	505.625	125.923	0.848305	2.73621
	15	545.717	571.038	728.25	129	0.695398	0.737652	1284.29	1733.62	1501.35	132.7	0.841409	1.16971	519.88	884.606	887.941	147.636	0.502825	0.995495	237.605	479.882	295.562	132.846	0.643815	2.13277	617.85	1308	295.312	122	2.86103	6.84317	1397.02	3348.34	884.714	131.926	1.68054	4.27267	805.969	858.935	667.2	127.65	1.25719	1.35536	1554.67	3528.63	1243.5	127.857	1.27892	3.04826
	16	974.531	1324.1	1475.6	128.429	0.628058	0.887539	1326.07	1651.35	1393.44	130.219	0.946663	1.20417	468.753	595.349	632.148	148.364	0.662256	0.923935	411.023	518.498	553.8	128.367	0.664396	0.917021	1350.9	3439.07	1143.36	142.962	1.20747	3.29481	2101.99	4018.64	1469.95	136.618	1.47404	2.91153	798.202	1554.4	659.7	139.438	1.26622	2.7197	1086.22	1940.68	907.75	128	1.22889	2.32469
	17	395.912	540.974	475.571	126.733	0.771645	1.18749	1056.64	1080.63	1448	124.935	0.704201	0.722336	995	1092.82	1329	191.043	0.706492	0.792453	732.838	782.059	1300.89	134.447	0.513003	0.5552	927.314	1725.79	864.167	125.5	1.08549	2.16646	1604.41	3610.36	1291.07	142.125	1.27272	3.01862	1389.17	3052.99	1172.2	134.738	1.20913	2.81288	2138.6	3900.67	1603.64	149.562	1.3679	2.57971
	18	312.424	381.806	343.929	143.143	0.843092	1.18864	1271.74	1280.15	1997.14	133.107	0.610845	0.615353	1035.02	2208.94	1685.22	142	0.578677	1.33937	230.256	272.445	269.84	130.411	0.716099	1.01868	551.502	1093.72	416.5	129.969	1.47116	3.36353	1110.06	2432.18	815.889	137.25	1.43348	3.38166	1178.35	2782.18	756.5	134.152	1.67783	4.25489	835.286	2189.14	675.615	124.378	1.28966	3.74568
	19	349.024	489.392	447.438	127.429	0.692465	1.1311	245.01	198.528	310.059	150.214	0.59305	0.302255	1071.92	1687.92	1623.3	142.692	0.627602	1.04364	245.134	259.948	323.562	127.4	0.600188	0.675707	942.291	2154.23	892.6	123.675	1.06462	2.64077	1342.49	3887.37	1373.5	129.32	0.975074	3.0205	1191.75	2709.81	929.706	131.056	1.32811	3.22889	726.987	1754.23	721.5	123.471	1.00918	2.72689
	20	515.715	589.468	544.3	122.885	0.932169	1.10718	260.015	284.712	313.933	122.607	0.718188	0.847271	608.151	1012.31	761.962	135.617	0.754431	1.3997	376.359	408.582	626.6	142.75	0.482813	0.54941	869.1	2925.99	701.182	122.906	1.29038	4.84731	758.263	2020.08	608.957	131.925	1.31299	3.95814	890.016	2395.51	891.2	134.389	0.998436	2.9877	1194.65	1972	781.25	157.917	1.66322	2.9103
	21	1254.63	1722.03	1469.71	127.241	0.839784	1.18795					#DIV/0!	#DIV/0!	454.099	709.839	687.962	130.667	0.58036	1.03926	330.445	325.327	411.824	131.483	0.709714	0.691458	458.801	1321.33	448.8	122.176	1.03062	3.67137	749.024	1820.21	547.542	130.681	1.48333	4.05298	1004.6	2340.39	612.818	131.767	1.81442	4.59123	1565.8	3493.69	932.077	127.786	1.78793	4.18493
	22	839.073	1178.71	1456.89	128.312	0.534979	0.790622					#DIV/0!	#DIV/0!	486.834	615.86	664.444	132.553	0.666078	0.908658	371.298	388.01	569.833	141.643	0.536339	0.575368	883.256	1532.48	601.143	123.474	1.5906	2.94975	1812.61	3380.39	1317.29	132.956	1.41823	2.742	1137.97	2353.01	881.8	133.25	1.34222	2.96542	984.897	2245.2	960.062	135.875	1.03013	2.55928
	23	411.865	553.949	565.188	149.192	0.631432	0.972983					#DIV/0!	#DIV/0!	407.167	622.22	611.2	138.395	0.568463	1.02331					#DIV/0!	#DIV/0!	533.485	1448.91	571.714	126	0.91423	2.96806	1233.98	2826.68	1000.21	131.206	1.269	3.10178	724.142	1864.9	595.286	131.638	1.27792	3.73833	945.797	971.466	791.6	129.591	1.23292	1.2717
	24	568.481	1212.1	934.476	127.426	0.546503	1.344					#DIV/0!	#DIV/0!					#DIV/0!	#DIV/0!					#DIV/0!	#DIV/0!	1445.3	2912.96	619.267	138.182	2.71701	5.76775					#DIV/0!	#DIV/0!					#DIV/0!	#DIV/0!					#DIV/0!	#DIV/0!
	25	715.027	736.52	1209.33	125.794	0.543804	0.56364					#DIV/0!	#DIV/0!					#DIV/0!	#DIV/0!					#DIV/0!	#DIV/0!					#DIV/0!	#DIV/0!					#DIV/0!	#DIV/0!					#DIV/0!	#DIV/0!					#DIV/0!	#DIV/0!
[truncated: 48 more columns]

## Sheet: Fig 6E
Figure 6E: Percentage of cells with distinct Pkc1-GFP puncta before/after heat shock in Wild type and tcb1/2/3D cells
	% cells with Pkc1-GFP puncta	Expt_1		Expt_2		Expt_3
	Strain	26C	10min 42C	26C	10min 42C	26C	10min 42C
	Wild type	2	6	2	0	0	4
	tcb1/2/3Δ	60	50	54	58	57	58

## Sheet: Fig 6F
Figure 6F: PM integrity assays before/after heat shock in Wild type and tcb1/2/3D cells +/- PKC1 overexpression plasmids
% cells with PI staining	Expt_1						Expt_2					Expt_3					Expt_4
		Raw data			-background		Raw data			-background		Raw data			-background		Raw data			-background
Strain	Construct	background	26C	10min 42C	26C	10min 42C	background	26C	10min 42C	26C	10min 42C	background	26C	10min 42C	26C	10min 42C	background	26C	10min 42C	26C	10min 42C
SEY6210.1 (Wild type)	none	0	0.1	0.2	0.1	0.2	0	0.1	0.2	0.1	0.2	0	0.1	0.2	0.1	0.2	0	0.1	0.2	0.1	0.2
	pkc1 OE	0	0.1	0.3	0.1	0.3	0	0.1	0.3	0.1	0.3	0	0.1	0.5	0.1	0.5	0	0.1	0.2	0.1	0.2
	pkc1 T16S OE	0	4	4.5	4	4.5	0	2.1	2.7	2.1	2.7	0	3.9	4.3	3.9	4.3	0	3.8	3.5	3.8	3.5
tcb1/2/3Δ	none	0.1	0.3	15.4	0.2	15.3	0.1	0.7	15	0.6	14.9	0	1.3	13.6	1.3	13.6	0	0.2	17.5	0.2	17.5
	pkc1 OE	0	0.3	12.7	0.3	12.7	0	0.3	14.3	0.3	14.3	0	0.8	15	0.8	15	0	0.3	8.8	0.3	8.8
	pkc1 T16S OE	0	3.5	8.9	3.5	8.9	0	3.8	8	3.8	8	0	6.2	8.1	6.2	8.1	0	4.9	14.6	4.9	14.6
