# Supplementary material for: Tricalbin proteins regulate plasma membrane phospholipid homeostasis
Source: Life Sci Alliance. 2022 Apr 19;5(8):e202201430. doi: 10.26508/lsa.202201430 (PMC9018018; doi:10.26508/lsa.202201430)
Supplement: Supplementary file 14 [file LSA-2022-01430_SdataFS6.xlsx]

## Sheet: Fig S6A
Figure S6A: Relative daughter/mother cell PM Pkc1-GFP fluorescence before/after heat shock in Wild type and sfk1D
	Strain	Wild type, 26C, N=3 n=59																		sfk1D, 26C, N=3 n=62																		Wild type, 10min 42C, N=3 n=62
	Exp.	1						2						3						1						2						3						1						2
		Aver. Mother PM	Aver. Daughter PM	Cyto	BG	Mother PM/Cyto	Daughter PM/Cyto	Aver. Mother PM	Aver. Daughter PM	Cyto	BG	Mother PM/Cyto	Daughter PM/Cyto	Aver. Mother PM	Aver. Daughter PM	Cyto	BG	Mother PM/Cyto	Daughter PM/Cyto	Aver. Mother PM	Aver. Daughter PM	Cyto	BG	Mother PM/Cyto	Daughter PM/Cyto	Aver. Mother PM	Aver. Daughter PM	Cyto	BG	Mother PM/Cyto	Daughter PM/Cyto	Aver. Mother PM	Aver. Daughter PM	Cyto	BG	Mother PM/Cyto	Daughter PM/Cyto	Aver. Mother PM	Aver. Daughter PM	Cyto	BG	Mother PM/Cyto	Daughter PM/Cyto	Aver. Mother PM	Aver. Daughter PM	Cyto	BG	Mother PM/Cyto	Daughter PM/Cyto
	1	3866.47	4226.82	4231.64	2605.29	0.77547	0.997036	3896.96	3564.17	3997.05	2590.82	0.928824	0.692173	4224.33	3968.03	5359.3	2517.52	0.600613	0.510423	5158.75	6236.05	6211.44	2762.82	0.694751	1.00714	5813.08	6188.45	6977.29	2815.43	0.720267	0.810459	12649.5	14080.1	21346.3	2814.57	0.53071	0.607905	6199.38	11674.8	4350.66	2449.14	1.97223	4.8517	8932.57	7525.77	6728.9	4337.02	1.92132	1.33316
	2	3526.53	3867.89	3908.46	2613.98	0.704952	0.968662							5439.73	6107.6	5507.49	2547.97	0.977106	1.20277	20261.7	24254.1	34258	3346.86	0.547209	0.676365							14456.4	13053.9	21775.6	3052.31	0.609086	0.534177	5681.99	9470.06	4325.67	2567.18	1.7713	3.92545	26476	53393.1	12948.4	5768.19	2.88403	6.63284
								14334	11929.8	23210	3919.15	0.539888	0.415259													3160.91	3367.81	5429.09	2554.68	0.210904	0.282885
	3	3809.4	3907.57	4421.38	2532.24	0.676056	0.728021							5385.07	7217.36	5896.28	2479.93	0.850364	1.38669	8695.89	7879.54	12099	2562.1	0.643164	0.557565							5211.47	5410.99	7809.75	2759.09	0.485555	0.52506	4277.76	6502.77	4329.68	2624	0.96956	2.27403	17959.7	27172.3	14404.4	3040.71	1.31286	2.12356
								5008.79	4637.65	4780.02	3159.5	1.14117	0.912149													3578.87	3607.59	4186.59	2596.73	0.617751	0.635814
	4	3552.83	3617.27	4278.72	2620.58	0.562227	0.601092							3841.49	3626.24	3955.88	2664.56	0.911417	0.744727	3567.48	3484.98	3823.18	2725.07	0.767151	0.69202							9714.74	12626.8	15093.4	3401.81	0.539955	0.789026	59376.2	56650.4	31867.7	4453.71	2.00345	1.90402	9454.47	23826.1	11264.5	4248.94	0.742	2.79054
								6825.1	7714.9	9117.52	3431.62	0.596824	0.753317													7557.15	7611.25	10025.4	2783.86	0.659153	0.666623
	5	4753.54	5351.34	5577.13	2743.88	0.709311	0.920306							3835.4	3774.05	4438.52	2564.3	0.678203	0.645473	6952.77	6785.02	10436.9	2776.75	0.545165	0.523265							9646.25	11456.4	16660	2700.47	0.497566	0.627235	12587.7	33746.2	6460.34	2923.92	2.73263	8.71566	9842.24	20387.4	11052.5	3694.65	0.835519	2.2687
	6	4560.72	4445.72	5489.16	2505.03	0.688874	0.650337	8714.6	8644.31	11994.8	3937.18	0.592907	0.584183	3711.39	3822.9	4031.9	2444.31	0.798112	0.868354	5914.9	7082.2	8232.47	3148.05	0.544183	0.773766	6863.26	6256.11	9129.77	4191.25	0.541055	0.418112	6042.08	7117.8	8654.21	2953.64	0.541778	0.730481	42836.7	63532.9	39909.3	3612.63	1.08065	1.65084	31508.5	58086.2	21095.5	3233.19	1.58296	3.07089
	7	3876.66	3723.98	5047.9	2508.32	0.538807	0.478685							12555	14246.2	24635.7	3224.4	0.435778	0.514768	7905.08	9433.47	13474.5	3043.45	0.466071	0.612593							11278.4	12162.6	19457.1	3040.58	0.501798	0.555662	15723	44764.3	9632.77	3187.61	1.94494	6.45084	22870.8	55872.8	20468.5	3750.48	1.14369	3.11774
								6108.34	5415.75	7185.26	3614.07	0.698442	0.504505													7108.16	7135.64	10345.1	3683.59	0.514083	0.518208
	8	4133.92	4604.92	4322.69	2731.11	0.8814	1.17733							5272.76	4949.37	6267.15	2892.75	0.705314	0.609477	7617.42	8907.89	10761.8	3144.39	0.587213	0.756624							10668	6764.17	15981.8	2809.32	0.596594	0.300236	6495.51	17466.7	7654.07	2655.45	0.768224	2.96307	11614.3	24724.2	8439.78	2751.73	1.5581	3.86292
								10574	10520.5	16453.5	3554.74	0.544184	0.540034													7098.61	7796.38	6995.85	4282.66	1.03787	1.29505
	9	4565.15	4310.93	6640.36	2538.72	0.494053	0.432074							4148.64	3660.87	4620.21	2976.67	0.713078	0.416296	14106.1	12551.9	24013.2	3068.5	0.526988	0.452783							5911.82	5863.69	8524.94	2569.57	0.561215	0.553134	12732.8	39090.8	10448.3	3234.36	1.31668	4.97044	21975.9	39847.7	22563.4	3172.5	0.969706	1.89136
								5811.57	6972.02	9259.88	3157.84	0.434892	0.625066													4304.32	3917.82	3996.3	2425.06	1.19604	0.950055
	10	3342.16	3479.26	3764.52	2388.09	0.693148	0.792749							4394.01	4642.46	5519.73	2675.32	0.604234	0.691582	7219.47	8003.66	10596.7	3149.81	0.546493	0.651797							6004.04	6864.66	7235.9	2829.42	0.720443	0.915749	22544	48920	16840.6	2665.78	1.40236	3.26314	10847.5	42869.5	9345	2869.22	1.23202	6.1769
	11	3541.77	3923.24	4282.05	2604.91	0.558603	0.786056	9842.73	9376.54	10307.7	5291.92	0.907306	0.814362	5261.16	4091.83	6845.04	2632.57	0.624002	0.346413	7448.48	7538.98	9821.41	2908.84	0.656723	0.669815	10762.6	10933.8	15832.2	3297.15	0.595566	0.609226	5228.72	6885.4	5184.76	2914.28	1.01936	1.74902	14134.5	32127.6	11494.8	2633.33	1.29788	3.32838	17679.1	44146.9	19527.3	3114.6	0.88739	2.50004
	12	3616.83	3955.12	4099.49	2529.27	0.692616	0.908059							4579.17	5010.45	6492.47	2791.18	0.483072	0.599592	11376.3	12508.3	14105.9	3291.57	0.747591	0.852269							10018.8	10678.7	15802.3	2648.42	0.560321	0.610487	26533.6	60952.7	24586.6	5123.76	1.10004	2.8685	17648.3	31939.5	13866.6	3558.66	1.36687	2.7533
								10600.7	11741	16491.7	3072.03	0.561023	0.645989													8581.54	8270.01	13941.2	2653.46	0.525177	0.497578
	13	3595.63	3595.12	3810.47	2543.4	0.830447	0.830041							6701.73	6497.65	8552.84	2862.73	0.67468	0.638814	14453.2	19540.9	28809.5	3485.73	0.433092	0.633997							18490	22762	38151.7	3296.88	0.435897	0.558461	9687.71	19258.5	8236.07	2844.7	1.26925	3.04446	6589.14	16799.1	6776	2657.77	0.954626	3.43384
								4083.25	5074.44	6422.08	2761.39	0.361093	0.631862													10429.7	12585.8	17807.3	2643.03	0.513486	0.655671
	14	28128.5	24682.8	8038.07	3935.32	5.89682	5.05697							13885.7	16041.8	23619.3	3737.19	0.510436	0.618877	17207.9	19266.2	19988.6	3761.73	0.828635	0.955481							11671.9	12671.8	24639.3	2978.34	0.401346	0.447509	12620.7	39265.2	11460.1	2665.43	1.13197	4.1616	11771.1	37062.9	14492	2966.56	0.763927	2.95837
								4896.29	4375.93	4298.5	2652.17	1.36311	1.04703													8745.52	10342.8	11270.9	2819.91	0.701171	0.890174
	15	4157.31	4729.53	4337.09	2600.14	0.896498	1.22594							19031.2	22380.4	42172.2	2919.94	0.410455	0.49578	7017.6	6355.13	9866.39	2896.6	0.591267	0.496217							8499.54	11039.7	14930.1	2680.17	0.475054	0.682419	9205.84	22498.7	6706.16	3043.8	1.68253	5.31214	6516.12	18177.7	6988.31	2731.76	0.889066	3.62874
	16	3532.93	3769.96	3959.85	2814.84	0.627149	0.834162	7565.51	7138.74	12032.2	2722.51	0.520211	0.47437	3801.74	3946.75	3568.9	2549.21	1.22835	1.37056	18426.4	21554	31301.1	3707.22	0.533423	0.646765	10141.6	8891.06	15197.8	2993.62	0.585702	0.483232	14873	11114.5	24844.2	3179.99	0.539739	0.36625	26187.3	57219.7	16039.1	3177.86	1.78905	4.20192	6796.36	10743.8	5523.38	2790.55	1.46581	2.91027
	17	3692.6	3751.7	4539.66	2479.2	0.588897	0.617577							3920.4	4139.72	4669.02	2503.65	0.654274	0.755561	8773.64	11299.4	13128	2919.84	0.573445	0.820873							9814.1	11395.5	15567.5	3891.93	0.507227	0.642675	12522.8	32997.2	9626.99	2487.89	1.40562	4.27355	21240.4	41088.9	18862.5	3589.82	1.15569	2.4553
								9894.5	13119.1	14869.6	3219.64	0.572952	0.849742													18197.9	16703.7	32210.2	3138.31	0.518011	0.466616
	18	3695.66	3941.09	4281.1	2604.91	0.650733	0.797155							4007.59	5023.8	4913.5	2613.2	0.606174	1.04795	7390.22	7009.3	9697.34	2671	0.671648	0.617433							9646.25	11456.4	16660	2700.47	0.497566	0.627235	30118.2	58107.1	28263.7	3126.59	1.07378	2.18723	19447.1	49991.2	17362.2	3134.05	1.14654	3.29328
								5960.82	7119.99	9059.83	2788.89	0.505814	0.690663													6274.26	5956.92	8562.9	2834.1	0.600502	0.545109
	19	3958.85	3934.79	4182.34	2507.02	0.866599	0.852236							4166.07	4391.87	4400.87	2650.99	0.865816	0.994855	5370.23	5379.74	7198.29	2748.7	0.589161	0.5913							5370.23	5379.74	7198.29	2748.7	0.589161	0.5913	12209.7	26309.1	9152.05	2840.46	1.48444	3.71834	20360.5	53959.8	19089.2	3147.22	1.07975	3.18735
								12158.3	14357.6	20347.9	2989.44	0.52821	0.654907													12672.5	10870.6	18983.7	3401.19	0.594982	0.479344
	20	4753.91	4366.13	4878.47	3304.02	0.920887	0.674593													12649.5	14080.1	21346.3	2814.57	0.53071	0.607905							10215.6	10430.1	13855.6	3843.79	0.636432	0.65785	29356.8	63113.8	18322.7	2848.92	1.71308	3.89464	21909.9	46283.4	16791.1	4417.58	1.41369	3.3835
	21	3928.41	3975.43	4294.88	2629.93	0.779891	0.808128	4786.24	4939.61	6540.56	2489.43	0.566956	0.604814							14456.4	13053.9	21775.6	3052.31	0.609086	0.534177	8802.67	9505.5	14621.2	2947.58	0.501563	0.56177	9373.65	9444.19	12241.2	5170.91	0.594425	0.604403							14300	35614.8	13895.8	2923.29	1.03683	2.9794
	22																			5211.47	5410.99	7809.75	2759.09	0.485555	0.52506
								11977.8	13051.7	17764.1	3352.7	0.598491	0.673009													7281.61	7481.1	9353.87	2693.82	0.688853	0.718805
	23																			9714.74	12626.8	15093.4	3401.81	0.539955	0.789026
								22344.7	22081	40686.5	3176.73	0.511012	0.503981
	24
								16322.7	18588.1	28554.1	2973.07	0.521855	0.610415
	25
[truncated: 24 more columns]

## Sheet: Fig S6C and D
Figure S6C and D: Relative daughter/mother cell PM Pkc1-GFP fluorescence before/after heat shock in Wild type +/-myriocin
	Strain	Wild type, 26C, N=3 n=63																		Wild type, 10min 42C, N=3, n=66																		Wild type + myriocin, 26C, N=3 n=63
	Exp.	1						2						3						1						2						3						1						2
		Aver. Mother PM	Aver. Daughter PM	Cyto	BG	Mother PM/Cyto	Daughter PM/Cyto	Aver. Mother PM	Aver. Daughter PM	Cyto	BG	Mother PM/Cyto	Daughter PM/Cyto	Aver. Mother PM	Aver. Daughter PM	Cyto	BG	Mother PM/Cyto	Daughter PM/Cyto	Aver. Mother PM	Aver. Daughter PM	Cyto	BG	Mother PM/Cyto	Daughter PM/Cyto	Aver. Mother PM	Aver. Daughter PM	Cyto	BG	Mother PM/Cyto	Daughter PM/Cyto	Aver. Mother PM	Aver. Daughter PM	Cyto	BG	Mother PM/Cyto	Daughter PM/Cyto	Aver. Mother PM	Aver. Daughter PM	Cyto	BG	Mother PM/Cyto	Daughter PM/Cyto	Aver. Mother PM	Aver. Daughter PM	Cyto	BG	Mother PM/Cyto	Daughter PM/Cyto
	1	734.848	718.61	1161.91	124.065	0.588513	0.572867	1199.07	1181.14	1735.83	121.955	0.667407	0.656302	268.005	263.185	333.396	125.313	0.685746	0.662582	994.693	1488.88	891.156	132.572	1.13649	1.78795	1337.89	1018.41	1045.85	136.528	1.32116	0.969824	922.36	1867.27	852.325	131.576	1.09717	2.40818	242.217	307.136	406.33	122.56	0.421669	0.650442	359.566	370.766	542.7	132.127	0.553955	0.581234
	2	356.79	527.514	429.191	120.897	0.765156	1.31893	219.842	178.982	199.999	122.42	1.25578	0.729089	554.37	707.735	1019.96	122.978	0.48094	0.65192	1168.12	3168.83	974.416	158.122	1.2373	3.68827	782.575	2400.8	666.3	125.312	1.21493	4.20618	1699.88	1812.05	1305.29	146.085	1.3404	1.43716	639.657	808.364	1118.41	125.951	0.517611	0.6876	326.822	539.655	475.101	131.049	0.569022	1.18763
	3	314.769	536.172	433.708	122.683	0.61759	1.32944	842.903	758.857	1650.26	128.426	0.469486	0.414259	830.667	874.166	1219.43	139.022	0.640167	0.680429	1454.71	3616.07	1081.97	135.902	1.39399	3.67855	3172.46	3414.91	2069.76	136.028	1.57025	1.69562	1190.1	3283.8	698.278	133.943	1.87151	5.58153	653.958	1130.57	1570	126.108	0.365573	0.695662	440.132	579.116	614.619	144.727	0.628666	0.924444
	4	634.879	981.392	870.769	130.714	0.681253	1.14948	923.144	1014.31	1555.1	132.64	0.55573	0.619822	401.939	480.491	633.767	123.24	0.545905	0.699769	2675.73	3894.66	2404.58	164.86	1.12107	1.6653	1686.96	1019.41	1293.44	141.618	1.34165	0.762095	968.087	933.596	722.317	135.739	1.41899	1.36019	1197.13	1409.72	2069.46	125.996	0.551147	0.660536	602.865	730.376	1079.67	149.483	0.487408	0.624489
	5	829.98	1623.57	1293.12	121.853	0.604579	1.28213	667.867	655.127	1102.18	129.589	0.553449	0.54035	457.422	424.201	962.589	122.03	0.399011	0.359488	1055.13	2826.43	707.056	155.825	1.63144	4.8448	2734.92	2427.82	1634.17	135.685	1.73458	1.52964	1152.42	1137.18	758.586	147.711	1.6447	1.61976	581.389	760.756	1000.38	126.625	0.520471	0.725754	687.184	1075.73	1646.32	129.238	0.367776	0.62389
	6	293.059	281.658	451.644	121.108	0.520219	0.485726	672.668	617.646	1349.82	126.379	0.44652	0.401547	604.898	672.944	882.294	126.629	0.632911	0.722959	453.028	880.027	608.526	128.619	0.675983	1.56574	2741.2	2816.96	1858.97	135.491	1.51189	1.55584	1387.98	1486.45	966.887	144.131	1.51181	1.6315	655.486	802.015	1200.5	127.726	0.491957	0.628545	473.372	791.098	1195.06	133.579	0.320112	0.619436
	7	280.432	287.275	345.661	122.901	0.707178	0.737897	644.376	540.989	1041.82	123.667	0.567125	0.454522	370.864	528.889	629.331	137.843	0.474113	0.795637	1179.06	1524.35	1166.84	134.338	1.01184	1.34626	817.236	1334.83	831.163	131.917	0.980083	1.7203	867.72	1306.43	709.421	130.938	1.27365	2.03202	430.119	481.554	616.703	125.63	0.620048	0.724788	370.981	385.153	455.754	127.66	0.74162	0.784815
	8	234.83	230.659	300.208	130.63	0.614466	0.58987	227.023	276.61	351.478	124.754	0.451073	0.669784	1095.27	1227.42	2211.56	130.566	0.463579	0.527081	1227.66	3302.26	808.017	141.219	1.62935	4.74063	728.239	1967.03	391.574	131.211	2.29306	7.05098	1278.11	3567.75	1475.08	154.975	0.850794	2.58523	318.187	580.757	473.747	128.725	0.54913	1.31015	359.299	338.39	567.235	134.054	0.519979	0.47171
	9	227.754	217.865	369.08	123.963	0.423435	0.383091	985.541	1106.42	2085.41	145.883	0.432919	0.495245	987.653	1249.73	1761.56	136.439	0.523786	0.685051	1395.82	3513.7	1098.99	136.828	1.3085	3.50967	839.99	2923.7	992.345	128.814	0.823567	3.23658	1138.09	1550.72	779.177	131.846	1.55444	2.19189	762.03	941.927	1084.48	123.922	0.664308	0.851592	929.369	1066.84	1598.01	136.849	0.542392	0.636474
	10	388.243	565.586	561.167	134.867	0.594361	1.01037	256.957	282.184	341.947	127.23	0.604177	0.721666	740.683	879.403	756.582	127.183	0.974739	1.19514	757.032	687.844	546.782	132.461	1.50746	1.34047	1810.3	3206.66	1158.09	131.315	1.6352	2.99515	1160	1461.49	764.875	139.511	1.63183	2.11394	633.132	798.607	1440.12	127.194	0.385351	0.511386	250.427	382.016	412.849	127.894	0.430008	0.891797
	11	422.846	396.051	766.231	128.812	0.461288	0.419252	545.426	674.925	891.831	129	0.545895	0.715657	317.916	415.82	580.468	131.442	0.415286	0.633322	642.403	935.865	480.537	135.917	1.46969	2.32125	856.046	2217.31	476.934	127.888	2.08614	5.9861	1696.98	4026.83	1651.49	248.533	1.03242	2.69309	976.808	1068.63	1626.62	123.35	0.567735	0.628817	432.49	480.087	884.769	128.582	0.401895	0.464839
	12	353.511	417.676	569.58	130.287	0.508144	0.654208	1127.27	1242.58	1834.63	124.869	0.586282	0.653723	549.629	624.217	819.042	133.115	0.607228	0.715968	1197.51	2983	861.86	126.377	1.45637	3.88401	3206.44	3556.68	2245.16	192.467	1.4683	1.63893	790.793	1540.57	661.303	138.09	1.24749	2.68052	1075.15	1144.64	1796.44	129.932	0.567185	0.608881	376.761	400.855	655.492	121.436	0.478087	0.523202
	13	341.265	417.547	450.329	133.489	0.655776	0.896535	809.381	2657.32	1364.77	136.019	0.548005	2.05192	237.637	254.099	236.732	126.206	1.00819	1.15713	1154.79	2383.34	993.635	131.111	1.18684	2.61121	1730.95	3453.27	1402.32	135.899	1.25949	2.61948	1208.04	1800.87	902.631	140.593	1.40078	2.17873	1382.01	1287.56	2258.97	130.688	0.587948	0.543569	839.387	824.706	1358.41	122.704	0.579977	0.568096
	14	329.125	323.865	594.361	126.408	0.433199	0.421959	504.137	542.193	657.436	132.031	0.708227	0.780659	616.769	685.932	892.961	124.711	0.640492	0.730519	1658.01	1335.51	792.388	127.227	2.30138	1.81653	2858.2	3394.51	1862.88	155.92	1.5831	1.89729	1612.32	1715.87	1230.98	144.98	1.35113	1.44649	206.072	186.223	235.461	127.045	0.728924	0.545842	529.484	610.89	818.593	125.531	0.582853	0.700311
	15	326.359	409.601	517.59	131.12	0.505185	0.720576	670.022	788.086	970.977	134.659	0.640143	0.781314	236.524	253.339	262.973	119.28	0.815934	0.932954	765.414	2073.44	584.971	131.118	1.39758	4.27963	1251.79	1321.04	863.62	150.013	1.54396	1.641	2215.06	3394.1	1885.6	147.766	1.18958	1.86803	344.225	302.61	524.772	126.337	0.54686	0.442413	353.091	390.501	595.315	121.501	0.488778	0.567733
	16	248.352	368.596	413.598	125.109	0.427202	0.844008	630.015	667.468	924.283	133.805	0.627734	0.675114	299.874	396.588	453.575	120.665	0.538311	0.828822	1540.36	1361.92	1304.65	128.706	1.20044	1.0487	2394.93	2362.48	1435.29	167.279	1.75681	1.73122	841.031	2959.78	922.427	145.067	0.895292	3.62086	377.141	732.306	813.669	125.764	0.365424	0.881723	924.041	838.933	1375.09	128.09	0.638293	0.570043
	17	709.954	601.969	1073.84	128.984	0.614879	0.500591	220.765	504.873	365.547	124.937	0.398271	1.57905	266.845	249.968	318.261	125.506	0.733257	0.645701	1070.42	1353.93	1085.57	133.489	0.984095	1.28187	1175.56	1059.77	796.383	128.011	1.56732	1.39407	1887.38	2106.16	1914.74	136.479	0.984615	1.10764	497.513	564.714	782.337	125.905	0.566103	0.668476	274.458	216.092	353.2	127.61	0.650951	0.392225
	18	825.773	1024.5	1297.55	139.274	0.592692	0.764266	439.261	449.224	736.356	125.751	0.513442	0.529758	853.191	1113.41	1882.61	156.525	0.403612	0.554369	477.408	982.019	411.459	131.001	1.23515	3.03439	699.47	2886.57	634.548	132.202	1.12924	5.48302	1630.92	3633.27	1124.28	135.266	1.51226	3.53685	386.913	300.2	627.361	126.736	0.519704	0.346495	351.939	373.703	495.714	124.339	0.612858	0.671461
	19	643.932	623.644	964.047	131.207	0.615634	0.591274	995.056	1011.54	1207.73	125.348	0.80351	0.818743	274.276	255.219	393.384	129.632	0.548409	0.476156	542.975	504.942	305.783	131.658	2.36219	2.14377	647.865	1661.39	545.959	125.41	1.24232	3.65233	939.201	1655.85	895.065	132.55	1.05788	1.99773	231.852	215.246	311.052	122.962	0.578925	0.490637	534.257	474.171	931.789	122.036	0.50907	0.434867
	20	668.542	739.657	721.73	139.037	0.90872	1.03077	740.523	653.727	1369.21	122.162	0.495858	0.426257					#DIV/0!	#DIV/0!	1670.58	1560.62	1170.68	147.98	1.48881	1.38128	507.819	1440.99	581.475	128.042	0.837559	2.89557	847.235	1933.74	934.977	139.517	0.889697	2.25558	582.792	503.874	1015.46	125.6	0.51378	0.425094	968.255	1060.02	1341.3	127.436	0.69268	0.768278
	21	771.429	969.396	1439.62	145.102	0.483832	0.63676	1075.36	1039.83	1685.32	122.976	0.609587	0.586848					#DIV/0!	#DIV/0!	834.804	2766.17	1279.76	144.529	0.608047	2.30934	1834.87	1481.91	1099.35	165.785	1.78787	1.40978	1213.32	2299.46	895.813	130.464	1.41485	2.83399					#DIV/0!	#DIV/0!					#DIV/0!	#DIV/0!
	22	912.045	847.39	1543.51	179.917	0.536913	0.489498	824.28	671.916	1269.78	125.199	0.610774	0.477656					#DIV/0!	#DIV/0!	1222.44	2388.17	971.367	126.791	1.29728	2.67753	1410.11	3497.14	1140.33	166.952	1.27716	3.42127					#DIV/0!	#DIV/0!					#DIV/0!	#DIV/0!					#DIV/0!	#DIV/0!
	23					#DIV/0!	#DIV/0!					#DIV/0!	#DIV/0!					#DIV/0!	#DIV/0!	1734.45	2997.85	1048.91	167.741	1.77798	3.21176					#DIV/0!	#DIV/0!					#DIV/0!	#DIV/0!					#DIV/0!	#DIV/0!					#DIV/0!	#DIV/0!
	24					#DIV/0!	#DIV/0!					#DIV/0!	#DIV/0!					#DIV/0!	#DIV/0!					#DIV/0!	#DIV/0!					#DIV/0!	#DIV/0!					#DIV/0!	#DIV/0!					#DIV/0!	#DIV/0!					#DIV/0!	#DIV/0!
	25					#DIV/0!	#DIV/0!					#DIV/0!	#DIV/0!					#DIV/0!	#DIV/0!					#DIV/0!	#DIV/0!					#DIV/0!	#DIV/0!					#DIV/0!	#DIV/0!					#DIV/0!	#DIV/0!					#DIV/0!	#DIV/0!
[truncated: 24 more columns]
